# Supplementary material
Source: publisher site journal article supplement (https://www.spandidos-publications.com/1337/downloadSupplementary)
Supplement: Supplementary file 1 [file downloadSupplementary]

## Sheet: Table S3
Table SIII. Lung adenocarcinoma-specific differentially methylated probes analysis.
CpGs	logFC	AveExpr	t	P.Value	adj.P.Val	B	C_AVG	T_AVG	deltaBeta	CHR	MAPINFO	Strand	Type	gene	feature	cgi	feat.cgi	UCSC_CpG_Islands_Name	DHS	Enhancer	Phantom	Probe_SNPs	Probe_SNPs_10
cg27663938	-0.448765	0.368353	-21.1827	9.02621e-29	1.20566e-23	54.9977	0.592735	0.14397	-0.448765	12	103696381	F	I	C12orf42	Body	island	Body-island	chr12:103696090-103696418	NA	NA		rs10860980
cg24938752	-0.161208	0.839698	-20.997	1.41235e-28	1.41489e-23	54.5655	0.920302	0.759094	-0.161208	3	128294769	F	I	C3orf27	1stExon	opensea	1stExon-opensea		NA	NA		rs7626811
cg14823851	-0.311113	0.387023	-20.5687	4.01315e-28	3.21629e-23	53.556	0.54258	0.231467	-0.311113	17	59532306	R	I	TBX4	TSS1500	island	TSS1500-island	chr17:59531723-59535254	NA	NA
cg07004744	-0.221989	0.744475	-20.4064	5.98618e-28	3.99796e-23	53.169	0.855469	0.63348	-0.221989	8	641479	R	I	ERICH1	Body	shelf	Body-shelf	chr8:637393-638251	NA	NA
cg11201447	0.541307	0.510928	20.2942	7.90546e-28	4.13924e-23	52.8997	0.240274	0.781581	0.541307	8	128808063	F	II	MIR1204	TSS200	shore	TSS200-shore	chr8:128806081-128806899	NA	NA
cg27616751	-0.196876	0.803426	-20.2737	8.31802e-28	4.13924e-23	52.8504	0.901864	0.704988	-0.196876	7	100883077	F	I	FIS1	3'UTR	opensea	3'UTR-opensea		NA	NA
cg12595013	-0.328898	0.313609	-20.229	9.29657e-28	4.13924e-23	52.7427	0.478057	0.14916	-0.328898	3	147128123	F	I	ZIC1	1stExon	island	1stExon-island	chr3:147126988-147128999	TRUE	TRUE	high-CpG:148610539-148610905
cg10707788	-0.247503	0.768451	-19.8158	2.62052e-27	1.05009e-22	51.7381	0.892203	0.6447	-0.247503	6	1635847	R	I	GMDS	Body	opensea	Body-opensea		NA	NA
cg19336198	-0.195188	0.637813	-19.5425	5.24853e-27	1.91199e-22	51.0639	0.735407	0.540219	-0.195188	7	4746462	R	I	FOXK1	Body	opensea	Body-opensea		NA	TRUE
cg25247520	0.475628	0.600663	19.1691	1.37136e-26	3.55646e-22	50.1305	0.362849	0.838477	0.475628	8	128808017	F	II	MIR1204	TSS200	shore	TSS200-shore	chr8:128806081-128806899	NA	NA
cg09251197	-0.258311	0.802783	-19.168	1.37532e-26	3.55646e-22	50.1277	0.931939	0.673628	-0.258311	16	30000254	R	I	TAOK2	Body	shore	Body-shore	chr16:29998786-29999006	NA	NA
cg16768018	-0.444262	0.348354	-19.1557	1.42003e-26	3.55646e-22	50.0966	0.570486	0.126223	-0.444262	3	147108843	R	I	ZIC4	Body	island	Body-island	chr3:147108511-147111703	NA	NA
cg24586978	-0.331408	0.712985	-19.0826	1.71674e-26	4.04664e-22	49.9121	0.878689	0.547281	-0.331408	13	99612723	R	II	DOCK9	Body	opensea	Body-opensea		NA	TRUE
cg12419685	-0.16632	0.821664	-19.0004	2.12613e-26	4.73323e-22	49.704	0.904824	0.738504	-0.16632	20	33451367	R	I	GGT7	Body	island	Body-island	chr20:33451148-33451374	NA	TRUE
cg20779964	-0.336522	0.376018	-18.9218	2.61071e-26	5.5061e-22	49.5042	0.544278	0.207757	-0.336522	20	54580070	R	I	CBLN4	TSS200	island	TSS200-island	chr20:54578603-54580678	NA	NA
cg06215107	-0.308581	0.679411	-18.7799	3.78796e-26	7.08596e-22	49.1419	0.833702	0.525121	-0.308581	4	151504725	R	II	LRBA	Body	island	Body-island	chr4:151504011-151505085	NA	TRUE
cg13521620	-0.291906	0.758859	-18.7698	3.89029e-26	7.08596e-22	49.1159	0.904812	0.612905	-0.291906	17	57410687	R	II	YPEL2	5'UTR	shore	5'UTR-shore	chr17:57408787-57410145	NA	NA
cg19002941	-0.203144	0.71227	-18.7216	4.41707e-26	7.69567e-22	48.9922	0.813842	0.610699	-0.203144	8	641497	F	I	ERICH1	Body	shelf	Body-shelf	chr8:637393-638251	NA	NA
cg11731300	0.183238	0.193015	18.685	4.86461e-26	8.12226e-22	48.8982	0.101396	0.284634	0.183238	1	161008542	F	I	TSTD1	Body	island	Body-island	chr1:161008377-161008830	TRUE	NA		rs3766383
cg01302240	-0.205402	0.817359	-18.4964	8.01873e-26	1.19491e-21	48.4113	0.92006	0.714658	-0.205402	9	116263669	R	II	RGS3	TSS200	opensea	TSS200-opensea		NA	NA
cg08943107	-0.186772	0.766962	-18.4948	8.05116e-26	1.19491e-21	48.4073	0.860348	0.673576	-0.186772	1	39943966	F	I	MACF1	Body	opensea	Body-opensea		NA	TRUE
cg20309677	-0.249323	0.802598	-18.458	8.87999e-26	1.26228e-21	48.3118	0.927259	0.677936	-0.249323	1	116925753	F	II	ATP1A1	TSS1500	opensea	TSS1500-opensea		NA	NA
cg17159699	-0.208347	0.770907	-18.4158	9.93821e-26	1.28465e-21	48.2021	0.87508	0.666733	-0.208347	8	53081140	R	I	ST18	Body	opensea	Body-opensea		NA	TRUE
cg25774643	-0.520644	0.380492	-18.3491	1.18757e-25	1.48713e-21	48.0284	0.640814	0.12017	-0.520644	11	627175	R	I	SCT	TSS200	island	TSS200-island	chr11:626728-628037	NA	NA
cg06495961	-0.492628	0.42261	-18.3119	1.3119e-25	1.59304e-21	47.9313	0.668924	0.176296	-0.492628	7	153584582	R	II	DPP6	1stExon	island	1stExon-island	chr7:153583317-153585666	NA	NA
cg01280080	0.316054	0.30796	18.0999	2.31989e-25	2.54322e-21	47.3752	0.149932	0.465987	0.316054	2	216177276	R	II	ATIC	Body	shore	Body-shore	chr2:216176549-216177132	NA	NA
cg08293531	-0.232184	0.775025	-18.0992	2.32447e-25	2.54322e-21	47.3733	0.891118	0.658933	-0.232184	15	101601180	F	I	LRRK1	Body	opensea	Body-opensea		NA	NA		rs35376186
cg14427009	-0.346887	0.455884	-18.0954	2.34826e-25	2.54322e-21	47.3633	0.629328	0.282441	-0.346887	13	58207058	R	II	PCDH17	1stExon	island	1stExon-island	chr13:58206526-58208930	NA	NA
cg01701649	-0.408301	0.558534	-18.0088	2.96867e-25	3.13053e-21	47.1345	0.762685	0.354383	-0.408301	16	48589954	F	II	N4BP1	Body	opensea	Body-opensea		NA	TRUE
cg04549287	-0.18496	0.695789	-17.9777	3.22954e-25	3.2666e-21	47.0523	0.78827	0.603309	-0.18496	13	52952319	F	I	THSD1	Body	opensea	Body-opensea		NA	NA
cg07714812	-0.210952	0.66551	-17.9742	3.26074e-25	3.2666e-21	47.0429	0.770986	0.560034	-0.210952	6	1635611	F	I	GMDS	Body	opensea	Body-opensea		NA	NA
cg14750948	-0.387362	0.375266	-17.8885	4.11642e-25	4.02324e-21	46.8153	0.568947	0.181585	-0.387362	3	147130477	F	I	ZIC1	Body	island	Body-island	chr3:147130342-147130577	NA	NA
cg13962372	-0.283142	0.659054	-17.7355	6.25211e-25	5.69395e-21	46.4071	0.800625	0.517483	-0.283142	1	22415149	F	II	CDC42	Body	opensea	Body-opensea		NA	TRUE
cg07967632	-0.234245	0.784655	-17.6379	8.17126e-25	7.2764e-21	46.1455	0.901778	0.667533	-0.234245	15	101601131	R	I	LRRK1	Body	opensea	Body-opensea		NA	NA
cg06097704	-0.265515	0.693319	-17.5831	9.50333e-25	8.27862e-21	45.9978	0.826077	0.560562	-0.265515	17	820939	F	I	NXN	Body	opensea	Body-opensea		NA	NA
cg17724627	-0.19922	0.777616	-17.4894	1.23068e-24	1.00644e-20	45.7451	0.877226	0.678006	-0.19922	12	50041367	F	I	FMNL3	Body	opensea	Body-opensea		NA	TRUE
cg03964958	-0.369021	0.313243	-17.4687	1.3034e-24	1.04459e-20	45.689	0.497754	0.128733	-0.369021	2	176964720	F	I	HOXD12	1stExon	island	1stExon-island	chr2:176964062-176965509	NA	NA
cg05798501	-0.23641	0.760571	-17.4536	1.35891e-24	1.06773e-20	45.6482	0.878776	0.642366	-0.23641	7	30492171	R	I	NOD1	Body	opensea	Body-opensea		NA	NA
cg04738965	-0.398003	0.34581	-17.4232	1.47856e-24	1.1394e-20	45.5657	0.544811	0.146809	-0.398003	3	147127662	R	I	ZIC1	1stExon	island	1stExon-island	chr3:147126988-147128999	TRUE	TRUE
cg12492087	-0.363741	0.625994	-17.2254	2.56434e-24	1.86832e-20	45.027	0.807864	0.444123	-0.363741	15	42749885	F	II	ZFP106	TSS200	opensea	TSS200-opensea		TRUE	TRUE
cg00754604	-0.358141	0.702955	-17.1094	3.54972e-24	2.49551e-20	44.7087	0.882025	0.523884	-0.358141	2	161230046	R	II	RBMS1	Body	opensea	Body-opensea		NA	TRUE
cg08610862	-0.476208	0.459989	-17.0936	3.71024e-24	2.56339e-20	44.6654	0.698093	0.221885	-0.476208	1	197888469	F	II	LHX9	Body	shore	Body-shore	chr1:197887088-197887791	NA	NA
cg05027258	-0.180087	0.844375	-17.0629	4.04483e-24	2.74719e-20	44.5808	0.934419	0.754332	-0.180087	2	9459293	R	II	ASAP2	Body	island	Body-island	chr2:9459243-9459454	NA	TRUE
cg12739119	-0.178678	0.865548	-16.998	4.85602e-24	3.24316e-20	44.4019	0.954887	0.776209	-0.178678	1	43770523	R	II	TIE1	Body	island	Body-island	chr1:43770522-43770880	NA	NA			rs12022684
cg03169557	-0.23269	0.792928	-16.9541	5.49743e-24	3.61135e-20	44.2804	0.909272	0.676583	-0.23269	16	89598950	F	I	SPG7	Body	opensea	Body-opensea		NA	NA
cg07724304	-0.160868	0.835883	-16.9311	5.86756e-24	3.79233e-20	44.2166	0.916317	0.755449	-0.160868	17	73509955	R	II	CASKIN2	5'UTR	shore	5'UTR-shore	chr17:73511016-73513176	NA	NA
cg02098786	0.223289	0.358163	16.9221	6.01877e-24	3.80454e-20	44.1916	0.246519	0.469808	0.223289	14	24801794	R	I	ADCY4	Body	island	Body-island	chr14:24801680-24802153	NA	TRUE
cg22297934	-0.211591	0.683291	-16.9187	6.07634e-24	3.80454e-20	44.1823	0.789086	0.577495	-0.211591	17	76421671	R	I	DNAH17	Body	island	Body-island	chr17:76421441-76421766	NA	NA
cg12041266	-0.178656	0.818314	-16.877	6.83868e-24	4.21598e-20	44.0665	0.907642	0.728986	-0.178656	11	75050147	F	II	ARRB1	Body	opensea	Body-opensea		NA	TRUE			rs79781165
cg21768042	-0.157755	0.824311	-16.8608	7.15828e-24	4.34615e-20	44.0218	0.903189	0.745433	-0.157755	5	141059890	F	II	ARAP3	Body	opensea	Body-opensea		NA	NA
cg14214165	-0.308605	0.661431	-16.8451	7.48579e-24	4.47716e-20	43.978	0.815734	0.507129	-0.308605	2	218777482	R	II	TNS1	5'UTR	opensea	5'UTR-opensea		NA	TRUE
cg15672768	-0.348629	0.46177	-16.7066	1.11021e-23	6.27544e-20	43.5917	0.636084	0.287456	-0.348629	5	140741220	R	I	PCDHGA4	Body	island	Body-island	chr5:140741174-140741738	NA	NA
cg03517024	-0.209151	0.778493	-16.706	1.11189e-23	6.27544e-20	43.5902	0.883069	0.673917	-0.209151	16	2221057	R	I	TRAF7	Body	opensea	Body-opensea		NA	NA
cg02050917	-0.257985	0.634381	-16.5706	1.63808e-23	8.87041e-20	43.2104	0.763373	0.505388	-0.257985	1	2173571	F	I	SKI	Body	opensea	Body-opensea		NA	NA
cg23346516	-0.257969	0.659754	-16.5284	1.84914e-23	9.85872e-20	43.0916	0.788738	0.530769	-0.257969	17	76421646	F	I	DNAH17	Body	island	Body-island	chr17:76421441-76421766	NA	NA
cg24663845	-0.190741	0.759097	-16.5246	1.8698e-23	9.85872e-20	43.0807	0.854467	0.663727	-0.190741	3	125820497	F	II	SLC41A3	TSS200	opensea	TSS200-opensea		NA	TRUE
cg02075410	-0.244525	0.791976	-16.4836	2.10353e-23	1.08067e-19	42.9652	0.914238	0.669713	-0.244525	4	151504138	F	I	LRBA	Body	island	Body-island	chr4:151504011-151505085	NA	TRUE
cg21179088	-0.469094	0.439933	-16.476	2.15026e-23	1.0907e-19	42.9436	0.674481	0.205386	-0.469094	7	54612333	R	II	VSTM2A	Body	island	Body-island	chr7:54612324-54612558	NA	NA
cg15138339	0.354264	0.693293	16.4593	2.25602e-23	1.11609e-19	42.8965	0.516161	0.870425	0.354264	17	40715222	F	I	COASY	1stExon	island	1stExon-island	chr17:40714087-40715282	NA	NA	low-CpG:37968723-37968775
cg12691004	-0.450924	0.366237	-16.4182	2.54005e-23	1.24128e-19	42.7802	0.591699	0.140774	-0.450924	2	88352949	R	II	KRCC1	5'UTR	shore	5'UTR-shore	chr2:88354840-88355574	NA	NA
cg05139788	-0.420687	0.428754	-16.3986	2.68788e-23	1.29769e-19	42.7247	0.639098	0.218411	-0.420687	6	50690647	R	II	TFAP2D	Body	shore	Body-shore	chr6:50692149-50692375	NA	TRUE
cg15711404	-0.173138	0.830652	-16.3795	2.84032e-23	1.31523e-19	42.6706	0.917221	0.744083	-0.173138	17	80803949	F	II	TBCD	Body	opensea	Body-opensea		NA	NA			rs77339079
cg09934056	0.266222	0.211443	16.3793	2.84263e-23	1.31523e-19	42.6698	0.0783319	0.344554	0.266222	19	8400203	R	II	KANK3	Body	island	Body-island	chr19:8397958-8400461	NA	NA
cg20968743	0.438311	0.340713	16.3784	2.84997e-23	1.31523e-19	42.6673	0.121558	0.559868	0.438311	11	44883965	F	II	TSPAN18	5'UTR	opensea	5'UTR-opensea		NA	TRUE
cg09317554	-0.231709	0.795302	-16.2707	3.89302e-23	1.71429e-19	42.3612	0.911157	0.679447	-0.231709	4	151505084	F	II	LRBA	Body	island	Body-island	chr4:151504011-151505085	NA	NA
cg01275887	-0.195812	0.804753	-16.2654	3.95342e-23	1.72197e-19	42.3461	0.902659	0.706847	-0.195812	7	4747216	R	I	FOXK1	Body	opensea	Body-opensea		NA	TRUE		rs74974197
cg09479241	0.199246	0.217127	16.2321	4.35513e-23	1.85658e-19	42.2512	0.117504	0.31675	0.199246	17	27052676	F	I	TLCD1	Body	shore	Body-shore	chr17:27052941-27054084	TRUE	NA
cg18407955	-0.40621	0.445319	-16.1902	4.92005e-23	2.05371e-19	42.1315	0.648425	0.242214	-0.40621	7	158110685	R	II	PTPRN2	Body	island	Body-island	chr7:158110569-158110881	NA	TRUE
cg24444059	-0.260975	0.670933	-16.1614	5.35199e-23	2.18841e-19	42.0488	0.801421	0.540446	-0.260975	9	35909412	F	II	LOC158376	TSS200	opensea	TSS200-opensea		NA	NA		rs75732424
cg10853830	-0.186919	0.839665	-16.1338	5.7996e-23	2.34748e-19	41.97	0.933124	0.746205	-0.186919	11	67266176	R	I	PITPNM1	Body	shelf	Body-shelf	chr11:67260413-67262715	NA	NA		rs61755426
cg14410016	-0.297199	0.447552	-16.0641	7.11025e-23	2.81852e-19	41.77	0.596152	0.298953	-0.297199	2	176986659	F	I	HOXD9	TSS1500	island	TSS1500-island	chr2:176986424-176988291	NA	TRUE
cg02580005	-0.224823	0.803973	-16.0611	7.17433e-23	2.81852e-19	41.7611	0.916385	0.691561	-0.224823	4	151504187	F	II	LRBA	Body	island	Body-island	chr4:151504011-151505085	NA	TRUE
cg06794543	-0.370321	0.631554	-16.0466	7.48481e-23	2.90562e-19	41.7195	0.816714	0.446393	-0.370321	15	42749748	R	II	ZFP106	TSS200	opensea	TSS200-opensea		TRUE	TRUE
cg01636354	-0.225284	0.77603	-16.0441	7.54106e-23	2.90562e-19	41.7122	0.888672	0.663388	-0.225284	3	134078647	R	II	AMOTL2	Body	shore	Body-shore	chr3:134080390-134080596	NA	NA
cg06525280	0.274376	0.32738	16.0325	7.79998e-23	2.97676e-19	41.679	0.190192	0.464568	0.274376	2	216177303	R	II	ATIC	Body	shore	Body-shore	chr2:216176549-216177132	NA	NA
cg07792478	-0.4202	0.364995	-16.013	8.25887e-23	3.12216e-19	41.6229	0.575096	0.154895	-0.4202	8	65290484	F	I	MIR124-2	TSS1500	island	TSS1500-island	chr8:65290108-65290946	NA	NA
cg14162940	0.216316	0.244351	16.0063	8.42332e-23	3.15457e-19	41.6035	0.136193	0.352509	0.216316	20	30605868	F	I	C20orf160	Body	island	Body-island	chr20:30605744-30605970	TRUE	NA
cg20994118	0.325921	0.515608	15.9895	8.8489e-23	3.28326e-19	41.5551	0.352647	0.678568	0.325921	1	209780966	R	II	CAMK1G	Body	opensea	Body-opensea		TRUE	NA
cg20016631	-0.328327	0.637413	-15.9708	9.34932e-23	3.43711e-19	41.5011	0.801576	0.473249	-0.328327	4	38871320	R	II	FAM114A1	5'UTR	shore	5'UTR-shore	chr4:38869401-38869780	NA	NA
cg15888569	-0.358463	0.667126	-15.9599	9.65284e-23	3.51643e-19	41.4697	0.846358	0.487894	-0.358463	4	15033042	F	II	CPEB2	Body	opensea	Body-opensea		NA	TRUE
cg06807993	0.391832	0.669668	15.9077	1.12575e-22	4.02777e-19	41.3187	0.473752	0.865584	0.391832	17	79099785	R	I	MIR657	TSS1500	shelf	TSS1500-shelf	chr17:79102748-79102970	NA	NA
cg22274539	-0.378097	0.344676	-15.896	1.16515e-22	4.13183e-19	41.2849	0.533725	0.155628	-0.378097	12	103696209	R	I	C12orf42	Body	island	Body-island	chr12:103696090-103696418	NA	TRUE
cg20744163	-0.40736	0.621971	-15.8178	1.46789e-22	4.98483e-19	41.058	0.825651	0.418291	-0.40736	10	80999841	F	I	ZMIZ1	Body	shelf	Body-shelf	chr10:81002109-81003687	TRUE	TRUE		rs1749849
cg08171483	-0.220677	0.799331	-15.7769	1.65662e-22	5.53198e-19	40.9391	0.90967	0.688992	-0.220677	3	38010391	R	II	CTDSPL	Body	opensea	Body-opensea		NA	NA
cg17655624	0.161408	0.162304	15.761	1.73673e-22	5.66568e-19	40.8927	0.0815999	0.243008	0.161408	12	54785320	R	I	ZNF385A	TSS1500	shore	TSS1500-shore	chr12:54784900-54785238	TRUE	NA
cg04762412	-0.186578	0.813665	-15.7605	1.73907e-22	5.66568e-19	40.8914	0.906954	0.720376	-0.186578	20	44691505	R	I	NCOA5	Body	shelf	Body-shelf	chr20:44685771-44687610	NA	NA
cg11302791	-0.205651	0.826872	-15.7214	1.95315e-22	6.26131e-19	40.7773	0.929698	0.724047	-0.205651	8	10635419	R	II	PINX1	Body	opensea	Body-opensea		NA	TRUE
cg09803262	-0.486812	0.426672	-15.7154	1.98785e-22	6.32199e-19	40.76	0.670078	0.183267	-0.486812	7	96622608	R	II	DLX6AS	Body	opensea	Body-opensea		NA	TRUE
cg10507988	-0.353457	0.686503	-15.6769	2.22897e-22	6.94947e-19	40.6474	0.863232	0.509775	-0.353457	2	46593271	R	I	EPAS1	Body	opensea	Body-opensea		NA	TRUE
cg03971454	-0.235329	0.692409	-15.6753	2.23944e-22	6.94947e-19	40.6428	0.810073	0.574744	-0.235329	1	43770557	F	I	TIE1	Body	island	Body-island	chr1:43770522-43770880	NA	NA
cg10659886	-0.291484	0.39778	-15.6741	2.24756e-22	6.94947e-19	40.6393	0.543522	0.252038	-0.291484	19	58629719	R	I	ZSCAN18	Body	island	Body-island	chr19:58629309-58630241	NA	NA
cg06643271	0.250727	0.239416	15.6723	2.25963e-22	6.94947e-19	40.634	0.114053	0.36478	0.250727	17	76128170	F	II	TMC8	Body	island	Body-island	chr17:76127521-76128406	NA	NA
cg20568402	-0.193595	0.833875	-15.6705	2.27187e-22	6.94947e-19	40.6287	0.930672	0.737077	-0.193595	13	114126476	F	II	DCUN1D2	Body	opensea	Body-opensea		NA	NA
cg11601663	0.306999	0.667233	15.6638	2.31771e-22	7.036e-19	40.6091	0.513734	0.820733	0.306999	10	15666820	F	II	ITGA8	Body	opensea	Body-opensea		NA	TRUE
cg19760241	-0.418894	0.392563	-15.5843	2.93757e-22	8.85069e-19	40.3761	0.60201	0.183116	-0.418894	17	35300010	F	I	LHX1	Body	island	Body-island	chr17:35291899-35300875	NA	NA
cg12374721	-0.473182	0.356819	-15.5683	3.08103e-22	9.21364e-19	40.3292	0.593411	0.120228	-0.473182	17	46799640	F	I	C17orf93	TSS1500	shore	TSS1500-shore	chr17:46800533-46800746	NA	TRUE
cg12003230	-0.129141	0.8851	-15.5371	3.38177e-22	9.96426e-19	40.2376	0.949671	0.82053	-0.129141	21	44899139	R	II	C21orf84	TSS1500	opensea	TSS1500-opensea		NA	NA
cg26752613	-0.255854	0.667261	-15.5209	3.54986e-22	1.03079e-18	40.1899	0.795188	0.539334	-0.255854	7	30492160	R	I	NOD1	Body	opensea	Body-opensea		NA	NA
cg14343733	-0.222983	0.745759	-15.4309	4.65015e-22	1.331e-18	39.9244	0.857251	0.634268	-0.222983	9	130703735	R	II	FAM102A	3'UTR	shelf	3'UTR-shelf	chr9:130706912-130707273	NA	NA
cg13531667	0.324773	0.265312	15.4142	4.88894e-22	1.36783e-18	39.8751	0.102926	0.427699	0.324773	5	112825132	F	II	MCC	TSS1500	shore	TSS1500-shore	chr5:112823256-112824304	NA	NA
cg18623658	-0.226281	0.824566	-15.4124	4.91536e-22	1.36783e-18	39.8698	0.937707	0.711425	-0.226281	2	62900278	F	II	EHBP1	TSS1500	opensea	TSS1500-opensea		NA	TRUE
cg26495711	0.363268	0.656834	15.4051	5.0246e-22	1.38637e-18	39.8482	0.4752	0.838468	0.363268	2	240169280	R	I	HDAC4	Body	opensea	Body-opensea		NA	NA
cg10610428	0.338893	0.56753	15.4016	5.07802e-22	1.38637e-18	39.8378	0.398083	0.736977	0.338893	12	5884295	R	II	ANO2	Body	opensea	Body-opensea		NA	NA
cg12670305	0.188646	0.25093	15.4011	5.08575e-22	1.38637e-18	39.8363	0.156606	0.345253	0.188646	6	31762630	F	I	VARS	Body	shore	Body-shore	chr6:31763240-31763905	NA	NA
cg07000334	0.14988	0.204598	15.3936	5.20056e-22	1.39863e-18	39.8144	0.129658	0.279538	0.14988	12	54785286	R	I	ZNF385A	TSS1500	shore	TSS1500-shore	chr12:54784900-54785238	TRUE	NA
cg18886436	0.184857	0.164006	15.3708	5.57063e-22	1.46859e-18	39.7467	0.0715776	0.256435	0.184857	12	54785171	R	I	ZNF385A	TSS200	island	TSS200-island	chr12:54784900-54785238	TRUE	NA
cg00129232	-0.190951	0.852023	-15.3663	5.64724e-22	1.47275e-18	39.7333	0.947498	0.756547	-0.190951	17	37814104	R	I	STARD3	Body	opensea	Body-opensea		NA	NA
cg14754787	-0.407582	0.368913	-15.3427	6.06211e-22	1.55773e-18	39.6636	0.572704	0.165122	-0.407582	17	35299600	F	I	LHX1	Body	island	Body-island	chr17:35291899-35300875	NA	NA
cg15219228	-0.454818	0.361052	-15.3219	6.45578e-22	1.64774e-18	39.6017	0.588461	0.133643	-0.454818	6	35479628	F	I	TULP1	Body	island	Body-island	chr6:35479388-35479678	NA	TRUE
cg19618279	0.326629	0.697949	15.2822	7.27776e-22	1.84032e-18	39.4838	0.534634	0.861264	0.326629	17	40715228	F	I	COASY	1stExon	island	1stExon-island	chr17:40714087-40715282	NA	NA	low-CpG:37968723-37968775
cg23303108	0.343202	0.749083	15.281	7.30216e-22	1.84032e-18	39.4805	0.577483	0.920684	0.343202	8	23083578	R	I	TNFRSF10A	TSS1500	shore	TSS1500-shore	chr8:23081956-23082975	NA	NA
cg04503570	-0.13642	0.820915	-15.2349	8.39605e-22	2.10278e-18	39.3431	0.889125	0.752705	-0.13642	1	226897117	F	II	ITPKB	Body	opensea	Body-opensea		NA	TRUE
cg19211880	-0.263027	0.711407	-15.2019	9.27926e-22	2.29529e-18	39.2447	0.84292	0.579893	-0.263027	3	134088357	F	I	AMOTL2	Body	shelf	Body-shelf	chr3:134092257-134093741	TRUE	NA		rs74725592
cg24327132	0.334876	0.359817	15.1962	9.43946e-22	2.31438e-18	39.2278	0.192379	0.527254	0.334876	15	72520632	F	II	PKM2	5'UTR	shore	5'UTR-shore	chr15:72522131-72524238	NA	NA
cg14585967	0.359623	0.652932	15.1951	9.47195e-22	2.31438e-18	39.2244	0.47312	0.832743	0.359623	9	118135710	F	II	2019-12-01	5'UTR	opensea	5'UTR-opensea		TRUE	NA
cg00014998	-0.364749	0.575911	-15.192	9.56247e-22	2.32234e-18	39.2151	0.758285	0.393537	-0.364749	2	177014962	R	II	HOXD4	TSS1500	island	TSS1500-island	chr2:177014948-177015214	NA	NA
cg11095383	-0.360068	0.423781	-15.1778	9.98262e-22	2.40853e-18	39.1728	0.603815	0.243747	-0.360068	5	140174887	R	I	PCDHA1	Body	island	Body-island	chr5:140174573-140174888	TRUE	NA			rs7727472
cg01789499	-0.259886	0.751396	-15.176	1.00376e-21	2.40853e-18	39.1674	0.881339	0.621453	-0.259886	4	81109888	R	II	PRDM8	5'UTR	island	5'UTR-island	chr4:81109887-81110460	NA	NA
cg18505593	-0.168976	0.850055	-15.1562	1.06582e-21	2.54224e-18	39.1083	0.934543	0.765567	-0.168976	14	100059479	R	I	CCDC85C	Body	opensea	Body-opensea		NA	TRUE
cg14640592	-0.368477	0.478807	-15.1537	1.07406e-21	2.54671e-18	39.1007	0.663045	0.294568	-0.368477	1	203044726	R	II	PPFIA4	Body	island	Body-island	chr1:203044722-203045390	NA	TRUE
cg24809269	0.395912	0.559159	15.1405	1.11779e-21	2.63305e-18	39.0615	0.361202	0.757115	0.395912	17	74260692	F	II	FAM100B	TSS1500	shore	TSS1500-shore	chr17:74261127-74262282	NA	NA
cg08979319	-0.281394	0.4396	-15.1388	1.12361e-21	2.63305e-18	39.0563	0.580297	0.298903	-0.281394	6	100896055	R	I	SIM1	Body	island	Body-island	chr6:100895773-100896062	NA	TRUE			rs71566344
cg11751806	-0.348702	0.245653	-15.1198	1.19039e-21	2.75694e-18	38.9995	0.420004	0.0713023	-0.348702	12	43945680	F	II	ADAMTS20	1stExon	island	1stExon-island	chr12:43944719-43946285	NA	TRUE
cg09197075	0.350374	0.736981	15.0847	1.32467e-21	2.99995e-18	38.8943	0.561794	0.912168	0.350374	16	11769691	R	II	SNN	5'UTR	opensea	5'UTR-opensea		TRUE	NA
cg17858500	-0.211528	0.804759	-15.0846	1.32509e-21	2.99995e-18	38.894	0.910523	0.698995	-0.211528	20	3734725	F	I	C20orf27	Body	shore	Body-shore	chr20:3732061-3732944	NA	NA			rs11539186
cg24005685	-0.38235	0.349764	-15.0155	1.63597e-21	3.52454e-18	38.6865	0.540939	0.158589	-0.38235	4	111549880	R	II	PITX2	Body	island	Body-island	chr4:111549879-111550203	NA	TRUE
cg27243685	-0.169952	0.83151	-14.9942	1.74596e-21	3.7018e-18	38.6224	0.916486	0.746534	-0.169952	21	43642366	F	II	ABCG1	Body	shelf	Body-shelf	chr21:43638948-43640132	NA	TRUE
cg26422458	-0.420818	0.395663	-14.9663	1.90156e-21	4.01048e-18	38.5384	0.606072	0.185254	-0.420818	1	79472452	F	I	ELTD1	5'UTR	island	5'UTR-island	chr1:79472281-79472537	NA	TRUE
cg03859915	0.114962	0.183294	14.9487	2.00644e-21	4.20953e-18	38.4855	0.125813	0.240775	0.114962	2	28112817	R	I	BRE	TSS1500	shore	TSS1500-shore	chr2:28113060-28113764	NA	NA
cg08363794	-0.379341	0.437779	-14.9432	2.04067e-21	4.21852e-18	38.4689	0.62745	0.248108	-0.379341	2	176986460	R	II	HOXD9	TSS1500	island	TSS1500-island	chr2:176986424-176988291	NA	NA
cg23767994	-0.393786	0.553813	-14.943	2.04231e-21	4.21852e-18	38.4681	0.750706	0.356919	-0.393786	7	96621323	F	II	DLX6AS	Body	opensea	Body-opensea		NA	NA		rs35510195
cg03532926	-0.422486	0.357757	-14.9354	2.09035e-21	4.29561e-18	38.4452	0.569	0.146514	-0.422486	7	153584839	R	I	DPP6	Body	island	Body-island	chr7:153583317-153585666	NA	NA
cg09575756	-0.148864	0.830238	-14.9264	2.14851e-21	4.3703e-18	38.4181	0.90467	0.755806	-0.148864	5	138842776	R	II	ECSCR	TSS1500	opensea	TSS1500-opensea		NA	NA
cg13944175	-0.353691	0.302935	-14.918	2.20432e-21	4.46118e-18	38.3929	0.47978	0.126089	-0.353691	19	52222698	R	I	HAS1	Body	island	Body-island	chr19:52222423-52223208	NA	NA
cg19588399	0.186924	0.265522	14.8948	2.36695e-21	4.76484e-18	38.3228	0.17206	0.358984	0.186924	1	27668445	F	I	SYTL1	TSS200	opensea	TSS200-opensea		TRUE	TRUE
cg26530341	0.351355	0.72842	14.8928	2.38205e-21	4.76484e-18	38.3165	0.552742	0.904097	0.351355	8	23083353	R	II	TNFRSF10A	TSS1500	shore	TSS1500-shore	chr8:23081956-23082975	NA	NA
cg24114556	-0.422542	0.308183	-14.8917	2.39004e-21	4.76484e-18	38.3132	0.519454	0.0969126	-0.422542	17	44897431	R	I	WNT3	TSS1500	shore	TSS1500-shore	chr17:44895800-44897025	TRUE	NA
cg13816466	-0.261687	0.647843	-14.8848	2.44129e-21	4.83249e-18	38.2923	0.778687	0.517	-0.261687	9	35909466	F	II	LOC158376	TSS200	opensea	TSS200-opensea		NA	NA
cg15105326	-0.262209	0.384679	-14.8263	2.92207e-21	5.65667e-18	38.1153	0.515783	0.253574	-0.262209	3	147108916	R	I	ZIC4	Body	island	Body-island	chr3:147108511-147111703	NA	NA
cg27615388	-0.376243	0.328515	-14.8169	3.00777e-21	5.79456e-18	38.0868	0.516637	0.140394	-0.376243	5	63257092	R	I	HTR1A	1stExon	island	1stExon-island	chr5:63256548-63257886	NA	NA
cg11755933	-0.220357	0.810816	-14.8031	3.13831e-21	5.98848e-18	38.0449	0.920995	0.700638	-0.220357	11	67266128	R	I	PITPNM1	Body	shelf	Body-shelf	chr11:67260413-67262715	NA	NA
cg00799748	-0.174982	0.81203	-14.7908	3.25941e-21	6.19009e-18	38.0076	0.899521	0.724538	-0.174982	16	1611052	F	I	IFT140	Body	opensea	Body-opensea		NA	NA
cg24278165	0.33992	0.770774	14.7581	3.60539e-21	6.78286e-18	37.9083	0.600814	0.940733	0.33992	8	23083551	F	I	TNFRSF10A	TSS1500	shore	TSS1500-shore	chr8:23081956-23082975	NA	NA
cg08491487	-0.329673	0.425438	-14.7526	3.6663e-21	6.85299e-18	37.8917	0.590275	0.260602	-0.329673	6	30039130	F	I	RNF39	Body	island	Body-island	chr6:30038881-30039477	NA	NA			rs9261293
cg27450010	0.359208	0.527174	14.7517	3.67687e-21	6.85299e-18	37.8889	0.34757	0.706778	0.359208	4	16639181	R	II	LDB2	Body	opensea	Body-opensea		NA	TRUE			rs78854951
cg27260772	-0.514086	0.365687	-14.7452	3.75167e-21	6.96003e-18	37.8691	0.62273	0.108644	-0.514086	6	50791202	F	I	TFAP2B	Body	island	Body-island	chr6:50791110-50791573	NA	NA
cg17760049	-0.212862	0.811838	-14.7395	3.81835e-21	7.02693e-18	37.8517	0.918269	0.705407	-0.212862	7	4774448	F	I	FOXK1	Body	opensea	Body-opensea		NA	NA
cg20785796	-0.3461	0.444998	-14.736	3.85994e-21	7.06279e-18	37.841	0.618048	0.271947	-0.3461	2	200326721	R	I	SATB2	TSS1500	island	TSS1500-island	chr2:200320502-200329681	NA	NA
cg17746316	-0.217815	0.785161	-14.7312	3.91757e-21	7.11244e-18	37.8264	0.894069	0.676253	-0.217815	2	9401362	R	II	ASAP2	Body	opensea	Body-opensea		NA	TRUE
cg05021643	-0.321271	0.367079	-14.7257	3.98418e-21	7.19161e-18	37.8098	0.527715	0.206444	-0.321271	2	177029608	F	I	HOXD3	5'UTR	island	5'UTR-island	chr2:177029413-177029941	NA	NA
cg26205859	-0.422397	0.54776	-14.7182	4.07757e-21	7.2807e-18	37.787	0.758959	0.336562	-0.422397	7	76967860	R	II	PION	Body	opensea	Body-opensea		NA	TRUE
cg25021051	0.243387	0.298393	14.703	4.2742e-21	7.47927e-18	37.7406	0.1767	0.420086	0.243387	12	53448178	F	II	TENC1	Body	island	Body-island	chr12:53448008-53448406	NA	NA	high-CpG:51734434-51734495
cg26908825	-0.177307	0.837751	-14.6509	5.02204e-21	8.71181e-18	37.5817	0.926405	0.749097	-0.177307	6	1635818	R	II	GMDS	Body	opensea	Body-opensea		NA	NA
cg04604142	0.37772	0.65532	14.6424	5.15654e-21	8.83045e-18	37.5557	0.46646	0.84418	0.37772	17	48796515	R	II	LUC7L3	TSS1500	shore	TSS1500-shore	chr17:48796750-48797317	NA	NA
cg02037307	-0.384292	0.421869	-14.6283	5.38736e-21	9.18646e-18	37.5125	0.614015	0.229723	-0.384292	5	134363562	R	I	PITX1	3'UTR	island	3'UTR-island	chr5:134363092-134365146	NA	TRUE
cg18637486	0.323085	0.74503	14.6031	5.82462e-21	9.86479e-18	37.4356	0.583488	0.906573	0.323085	17	79099777	R	I	MIR657	TSS1500	shelf	TSS1500-shelf	chr17:79102748-79102970	NA	NA
cg19161124	-0.290244	0.396614	-14.6026	5.8344e-21	9.86479e-18	37.434	0.541736	0.251492	-0.290244	7	153583563	F	I	DPP6	TSS1500	island	TSS1500-island	chr7:153583317-153585666	NA	NA
cg26766064	0.334009	0.613761	14.5829	6.20117e-21	1.03109e-17	37.3739	0.446756	0.780765	0.334009	17	79099711	R	II	MIR657	TSS1500	shelf	TSS1500-shelf	chr17:79102748-79102970	NA	NA
cg17250863	-0.21159	0.792757	-14.5654	6.54933e-21	1.08448e-17	37.32	0.898553	0.686962	-0.21159	20	33451272	F	I	GGT7	Body	island	Body-island	chr20:33451148-33451374	NA	TRUE
cg10026317	-0.348694	0.469803	-14.5582	6.69762e-21	1.10447e-17	37.298	0.644149	0.295456	-0.348694	1	47694919	R	I	TAL1	5'UTR	shore	5'UTR-shore	chr1:47696504-47698197	NA	NA
cg14231297	-0.335204	0.369557	-14.549	6.89048e-21	1.127e-17	37.27	0.537159	0.201955	-0.335204	19	58629901	F	I	ZSCAN18	TSS200	island	TSS200-island	chr19:58629309-58630241	NA	NA		rs8109359
cg20765408	0.281679	0.292418	14.5229	7.47578e-21	1.21283e-17	37.1896	0.151579	0.433258	0.281679	13	25085669	F	II	PARP4	5'UTR	shore	5'UTR-shore	chr13:25086522-25087067	NA	NA
cg08139247	-0.293766	0.423242	-14.5212	7.51498e-21	1.21427e-17	37.1845	0.570125	0.276359	-0.293766	14	38725312	R	I	CLEC14A	1stExon	island	1stExon-island	chr14:38724254-38725537	NA	NA	high-CpG:37795015-37795125
cg09325711	0.257933	0.18478	14.5158	7.64068e-21	1.22471e-17	37.1681	0.0558133	0.313746	0.257933	7	39662764	F	II	RALA	TSS1500	island	TSS1500-island	chr7:39662543-39663792	NA	NA
cg25594100	-0.351027	0.649669	-14.5017	7.98445e-21	1.2652e-17	37.1247	0.825182	0.474155	-0.351027	7	4786943	F	I	FOXK1	Body	island	Body-island	chr7:4786761-4786987	NA	NA
cg15368455	-0.343549	0.564877	-14.5016	7.98804e-21	1.2652e-17	37.1243	0.736651	0.393102	-0.343549	5	37835958	R	II	GDNF	TSS1500	shore	TSS1500-shore	chr5:37836747-37840726	NA	TRUE
cg06335867	-0.374835	0.442877	-14.4887	8.31553e-21	1.30674e-17	37.0847	0.630295	0.255459	-0.374835	7	8482325	F	I	NXPH1	Body	island	Body-island	chr7:8481974-8482762	NA	NA
cg26831119	-0.371964	0.366923	-14.4771	8.62227e-21	1.34965e-17	37.049	0.552905	0.180941	-0.371964	4	111550830	R	I	PITX2	Body	shore	Body-shore	chr4:111549879-111550203	NA	NA
cg11855693	-0.132304	0.86988	-14.4705	8.80227e-21	1.37247e-17	37.0286	0.936032	0.803728	-0.132304	12	96632551	R	II	ELK3	Body	opensea	Body-opensea		NA	TRUE
cg24030037	-0.196295	0.838962	-14.4535	9.2804e-21	1.44141e-17	36.9764	0.937109	0.740814	-0.196295	8	27457282	F	I	CLU	Body	opensea	Body-opensea		NA	NA
cg13394216	-0.206283	0.748131	-14.3917	1.12613e-20	1.72872e-17	36.7857	0.851273	0.64499	-0.206283	6	1635808	R	I	GMDS	Body	opensea	Body-opensea		NA	NA
cg01012445	-0.207665	0.777879	-14.3893	1.1346e-20	1.72872e-17	36.7783	0.881712	0.674047	-0.207665	4	151504920	F	II	LRBA	Body	island	Body-island	chr4:151504011-151505085	NA	NA
cg20146489	-0.147285	0.808765	-14.368	1.21281e-20	1.83278e-17	36.7126	0.882408	0.735123	-0.147285	1	169847977	R	I	SCYL3	Body	opensea	Body-opensea		NA	TRUE
cg15698065	-0.160529	0.844382	-14.367	1.21661e-20	1.83278e-17	36.7095	0.924647	0.764118	-0.160529	13	114127206	R	II	DCUN1D2	Body	opensea	Body-opensea		NA	NA
cg11117099	0.235048	0.263079	14.3617	1.23684e-20	1.84934e-17	36.6932	0.145555	0.380603	0.235048	17	43325657	F	II	LOC100133991	Body	island	Body-island	chr17:43324689-43325729	NA	NA
cg04875128	-0.281934	0.31307	-14.3586	1.24904e-20	1.86065e-17	36.6836	0.454036	0.172103	-0.281934	15	31775895	R	I	OTUD7A	Body	island	Body-island	chr15:31775540-31776988	NA	NA
cg06188545	-0.349544	0.491706	-14.3517	1.27632e-20	1.89424e-17	36.6623	0.666478	0.316934	-0.349544	1	156863643	R	I	PEAR1	5'UTR	island	5'UTR-island	chr1:156863415-156863711	NA	NA
cg24161057	0.233527	0.246642	14.3471	1.29486e-20	1.91467e-17	36.648	0.129879	0.363406	0.233527	1	161008811	F	I	TSTD1	TSS200	island	TSS200-island	chr1:161008377-161008830	TRUE	NA		rs6656547
cg03946762	0.289015	0.293454	14.3423	1.31456e-20	1.93665e-17	36.6331	0.148947	0.437961	0.289015	12	54785043	R	II	ZNF385A	5'UTR	island	5'UTR-island	chr12:54784900-54785238	NA	NA	high-CpG:53071285-53071425
cg15205441	-0.215024	0.702338	-14.3119	1.44602e-20	2.10708e-17	36.5391	0.80985	0.594826	-0.215024	10	126782357	R	I	CTBP2	5'UTR	opensea	5'UTR-opensea		NA	NA
cg21230493	-0.375878	0.282852	-14.2957	1.52165e-20	2.20695e-17	36.4889	0.470791	0.094913	-0.375878	8	26722496	R	II	ADRA1A	1stExon	island	1stExon-island	chr8:26721642-26724566	NA	TRUE
cg15084543	-0.40789	0.509348	-14.2949	1.52557e-20	2.20695e-17	36.4863	0.713293	0.305402	-0.40789	1	79472408	R	I	ELTD1	5'UTR	island	5'UTR-island	chr1:79472281-79472537	NA	TRUE
cg07027430	-0.344581	0.396921	-14.2873	1.56264e-20	2.25245e-17	36.4626	0.569212	0.224631	-0.344581	16	7354685	F	II	A2BP1	Body	shore	Body-shore	chr16:7354333-7354608	NA	NA
cg11856711	0.151375	0.162731	14.2799	1.5991e-20	2.2938e-17	36.4399	0.0870437	0.238418	0.151375	12	54785309	R	I	ZNF385A	TSS1500	shore	TSS1500-shore	chr12:54784900-54785238	TRUE	NA
cg05877497	-0.341307	0.415151	-14.2792	1.60278e-20	2.2938e-17	36.4376	0.585805	0.244497	-0.341307	2	66667946	R	I	MEIS1	Body	opensea	Body-opensea		NA	TRUE
cg25406779	0.200467	0.203533	14.2548	1.73085e-20	2.46827e-17	36.3618	0.103299	0.303766	0.200467	19	40732712	F	II	CNTD2	TSS200	shore	TSS200-shore	chr19:40732075-40732665	NA	NA
cg02470871	0.238392	0.284837	14.2481	1.76778e-20	2.50846e-17	36.341	0.165641	0.404033	0.238392	3	119278637	R	I	CD80	TSS200	opensea	TSS200-opensea		NA	NA
cg15759721	0.339031	0.37842	14.2474	1.77155e-20	2.50846e-17	36.3389	0.208905	0.547936	0.339031	17	57918630	F	II	MIR21	Body	opensea	Body-opensea		NA	NA
cg04009429	-0.140605	0.851985	-14.2358	1.83744e-20	2.5926e-17	36.3029	0.922288	0.781683	-0.140605	7	100883125	F	II	FIS1	Body	opensea	Body-opensea		NA	NA
cg16746576	-0.405559	0.362704	-14.2327	1.8552e-20	2.60847e-17	36.2934	0.565483	0.159925	-0.405559	8	99962118	R	II	OSR2	Body	shore	Body-shore	chr8:99960497-99961438	NA	TRUE
cg22500132	0.261384	0.327137	14.2211	1.92439e-20	2.6869e-17	36.2573	0.196445	0.457828	0.261384	1	155162752	F	I	MUC1	TSS200	shore	TSS200-shore	chr1:155163434-155163818	NA	NA
cg01465169	0.171723	0.14396	14.2008	2.05186e-20	2.83524e-17	36.194	0.0580982	0.229822	0.171723	17	27944849	F	I	CORO6	Body	island	Body-island	chr17:27942532-27945388	TRUE	NA
cg13906823	0.256735	0.282806	14.1856	2.15287e-20	2.95444e-17	36.1466	0.154439	0.411173	0.256735	1	161008824	F	I	TSTD1	TSS200	island	TSS200-island	chr1:161008377-161008830	TRUE	NA		rs6656547
cg23440816	-0.316165	0.673797	-14.169	2.26879e-20	3.10289e-17	36.0949	0.831879	0.515715	-0.316165	1	223948910	R	I	CAPN2	Body	opensea	Body-opensea		NA	TRUE			rs7548911
cg08328160	-0.1802	0.829288	-14.1651	2.29668e-20	3.13035e-17	36.0828	0.919388	0.739188	-0.1802	6	32151394	R	II	AGER	Body	opensea	Body-opensea		NA	NA
cg22443762	-0.322114	0.550908	-14.1609	2.32736e-20	3.15073e-17	36.0697	0.711965	0.389851	-0.322114	1	197890608	F	II	LHX9	Body	island	Body-island	chr1:197890478-197890824	NA	NA
cg02694427	-0.361258	0.336155	-14.1531	2.38558e-20	3.20871e-17	36.0453	0.516784	0.155526	-0.361258	2	176964512	R	I	HOXD12	TSS200	island	TSS200-island	chr2:176964062-176965509	NA	NA
cg17029193	-0.257858	0.680086	-14.1461	2.43842e-20	3.26797e-17	36.0237	0.809015	0.551157	-0.257858	1	8510607	R	I	RERE	Body	opensea	Body-opensea		NA	TRUE		rs301813
cg18193094	-0.401256	0.334944	-14.1398	2.48774e-20	3.31934e-17	36.004	0.535572	0.134316	-0.401256	6	101846905	F	II	GRIK2	1stExon	island	1stExon-island	chr6:101846766-101847135	NA	NA
cg04085768	-0.175193	0.766442	-14.1391	2.49332e-20	3.31934e-17	36.0018	0.854038	0.678845	-0.175193	4	113333052	F	I	ALPK1	Body	island	Body-island	chr4:113332941-113333323	NA	TRUE
cg23075337	-0.423731	0.455736	-14.1333	2.53982e-20	3.35662e-17	35.9835	0.667601	0.24387	-0.423731	7	8481460	R	II	NXPH1	Body	shore	Body-shore	chr7:8481974-8482762	NA	NA
cg27032232	-0.411393	0.352577	-14.1324	2.54645e-20	3.35662e-17	35.981	0.558273	0.14688	-0.411393	7	153584609	R	I	DPP6	1stExon	island	1stExon-island	chr7:153583317-153585666	NA	NA
cg00579520	-0.382736	0.32251	-14.1218	2.63348e-20	3.44865e-17	35.9478	0.513878	0.131142	-0.382736	12	128752586	F	II	TMEM132C	Body	island	Body-island	chr12:128751041-128753151	NA	NA
cg04291025	0.191068	0.188822	14.1201	2.64784e-20	3.45616e-17	35.9424	0.0932885	0.284356	0.191068	15	69746140	F	II	RPLP1	Body	shore	Body-shore	chr15:69745049-69745746	NA	NA
cg02174232	0.222475	0.224754	14.1044	2.78287e-20	3.6089e-17	35.8934	0.113517	0.335992	0.222475	3	49712164	F	II	APEH	Body	island	Body-island	chr3:49710968-49712279	NA	NA
cg01943585	-0.143261	0.851705	-14.103	2.79487e-20	3.61277e-17	35.8891	0.923336	0.780075	-0.143261	1	112981693	R	II	CTTNBP2NL	Body	opensea	Body-opensea		NA	TRUE
cg26203839	-0.20452	0.539806	-14.0974	2.84524e-20	3.65902e-17	35.8715	0.642066	0.437546	-0.20452	8	142174631	R	I	DENND3	Body	opensea	Body-opensea		TRUE	TRUE
cg05455720	-0.404598	0.36851	-14.086	2.95025e-20	3.75658e-17	35.8357	0.57081	0.166211	-0.404598	8	65291703	F	II	MIR124-2	TSS200	shore	TSS200-shore	chr8:65290108-65290946	NA	NA
cg03292206	-0.191878	0.820529	-14.0857	2.953e-20	3.75658e-17	35.8348	0.916467	0.72459	-0.191878	2	111424914	F	II	BUB1	Body	opensea	Body-opensea		NA	TRUE
cg03352106	-0.422727	0.478712	-14.0833	2.97553e-20	3.77326e-17	35.8273	0.690075	0.267348	-0.422727	12	21926476	R	I	KCNJ8	Body	opensea	Body-opensea		NA	NA
cg00007076	0.292069	0.386822	14.076	3.0447e-20	3.8488e-17	35.8046	0.240787	0.532856	0.292069	8	67342600	F	II	RRS1	1stExon	shore	1stExon-shore	chr8:67344497-67344989	NA	NA
cg05465955	0.339831	0.627527	14.0668	3.13464e-20	3.93765e-17	35.7759	0.457611	0.797442	0.339831	17	40715236	F	I	COASY	1stExon	island	1stExon-island	chr17:40714087-40715282	NA	NA	low-CpG:37968723-37968775
cg01772014	0.242996	0.265243	14.058	3.22428e-20	4.00009e-17	35.7481	0.143745	0.38674	0.242996	20	30606095	F	II	C20orf160	Body	shore	Body-shore	chr20:30606492-30607174	TRUE	NA
cg22731271	-0.381554	0.364964	-14.0498	3.30863e-20	4.09207e-17	35.7226	0.555741	0.174188	-0.381554	2	66667059	R	I	MEIS1	Body	opensea	Body-opensea		NA	NA	low-CpG:66520560-66520567
cg02753187	-0.437565	0.375193	-14.0415	3.39698e-20	4.17556e-17	35.6966	0.593975	0.156411	-0.437565	17	46919180	R	II	CALCOCO2	Body	opensea	Body-opensea		NA	NA
cg18737081	-0.2917	0.650774	-14.034	3.47925e-20	4.26362e-17	35.673	0.796624	0.504924	-0.2917	10	80999807	F	I	ZMIZ1	Body	shelf	Body-shelf	chr10:81002109-81003687	TRUE	TRUE
cg09882144	-0.133663	0.873543	-14.0273	3.55402e-20	4.32877e-17	35.652	0.940374	0.806712	-0.133663	12	125339904	F	II	SCARB1	Body	opensea	Body-opensea		NA	TRUE
cg15541630	-0.324146	0.444742	-14.0124	3.72643e-20	4.49951e-17	35.6053	0.606815	0.282669	-0.324146	8	87081770	F	I	PSKH2	1stExon	island	1stExon-island	chr8:87081653-87082046	NA	NA
cg23929284	0.162635	0.146734	14.0122	3.72836e-20	4.49951e-17	35.6048	0.0654169	0.228052	0.162635	20	30605916	F	I	C20orf160	Body	island	Body-island	chr20:30605744-30605970	TRUE	NA
cg09361748	0.308919	0.589826	14.009	3.76705e-20	4.51637e-17	35.5946	0.435366	0.744285	0.308919	7	71682306	R	II	CALN1	Body	opensea	Body-opensea		NA	NA
cg19449565	-0.186	0.804417	-14.0083	3.77568e-20	4.51637e-17	35.5923	0.897417	0.711417	-0.186	2	240230892	F	II	HDAC4	Body	opensea	Body-opensea		TRUE	TRUE
cg06024289	0.0979403	0.130805	14.0029	3.84055e-20	4.58031e-17	35.5755	0.0818346	0.179775	0.0979403	12	53342595	R	I	KRT18	TSS200	shore	TSS200-shore	chr12:53342805-53343162	TRUE	NA
cg09520126	-0.153013	0.833073	-14.0001	3.87495e-20	4.60499e-17	35.5667	0.90958	0.756567	-0.153013	7	158802720	R	I	LOC154822	Body	shelf	Body-shelf	chr7:158798591-158799434	NA	NA
cg07274716	-0.354748	0.377325	-13.9993	3.88423e-20	4.60499e-17	35.5643	0.554699	0.19995	-0.354748	5	134363973	F	I	PITX1	3'UTR	island	3'UTR-island	chr5:134363092-134365146	NA	TRUE
cg08091192	-0.430996	0.307224	-13.9922	3.97323e-20	4.69661e-17	35.542	0.522722	0.0917264	-0.430996	3	147114986	R	II	ZIC4	Body	shore	Body-shore	chr3:147115764-147116421	NA	NA
cg02772121	0.416644	0.600491	13.9797	4.13463e-20	4.85873e-17	35.5027	0.392169	0.808812	0.416644	6	30130881	F	I	TRIM15	TSS200	opensea	TSS200-opensea		NA	TRUE		rs2517625
cg07974511	-0.423609	0.390102	-13.9718	4.24069e-20	4.9543e-17	35.4777	0.601906	0.178297	-0.423609	2	63283013	F	I	OTX1	Body	island	Body-island	chr2:63282514-63283122	NA	TRUE		rs61742369
cg06215569	-0.450032	0.296997	-13.9607	4.39222e-20	5.08684e-17	35.443	0.522012	0.0719808	-0.450032	1	110611465	R	II	ALX3	Body	island	Body-island	chr1:110610265-110613303	NA	TRUE
cg13997788	-0.323123	0.568679	-13.9543	4.48242e-20	5.17634e-17	35.423	0.73024	0.407117	-0.323123	2	46593223	R	I	EPAS1	Body	opensea	Body-opensea		NA	TRUE
cg05323533	-0.366741	0.488573	-13.94	4.69239e-20	5.37237e-17	35.3778	0.671944	0.305203	-0.366741	4	41750362	R	II	PHOX2B	Body	shore	Body-shore	chr4:41752280-41752502	NA	NA
cg02362103	-0.361873	0.383546	-13.9317	4.81825e-20	5.48513e-17	35.3517	0.564482	0.202609	-0.361873	1	119532773	F	I	TBX15	TSS1500	shore	TSS1500-shore	chr1:119531991-119532196	NA	NA
cg02131853	0.33034	0.533182	13.9266	4.89645e-20	5.53695e-17	35.3358	0.368012	0.698352	0.33034	4	39034637	F	II	TMEM156	TSS1500	opensea	TSS1500-opensea		NA	NA
cg02361027	-0.26172	0.680769	-13.9262	4.90353e-20	5.53695e-17	35.3344	0.811629	0.54991	-0.26172	2	170217401	F	II	LRP2	Body	shore	Body-shore	chr2:170218314-170219203	NA	NA
cg25135457	0.33552	0.738403	13.9261	4.90523e-20	5.53695e-17	35.334	0.570643	0.906163	0.33552	17	40715244	F	I	COASY	1stExon	island	1stExon-island	chr17:40714087-40715282	NA	NA	low-CpG:37968723-37968775
cg20916523	0.337326	0.472858	13.9146	5.08744e-20	5.7265e-17	35.298	0.304195	0.641521	0.337326	3	10184584	R	I	VHL	Body	shore	Body-shore	chr3:10183305-10183941	NA	NA
cg16438182	-0.214126	0.657532	-13.9123	5.1253e-20	5.75295e-17	35.2907	0.764595	0.550469	-0.214126	17	78916567	R	I	RPTOR	Body	shore	Body-shore	chr17:78915562-78915882	TRUE	TRUE
cg00334063	-0.465724	0.378333	-13.9097	5.168e-20	5.78468e-17	35.2825	0.611195	0.145471	-0.465724	3	147106010	R	I	ZIC4	3'UTR	shelf	3'UTR-shelf	chr3:147108511-147111703	NA	NA
cg04907244	0.336643	0.335259	13.9024	5.28984e-20	5.90457e-17	35.2595	0.166938	0.503581	0.336643	7	22894795	F	II	SNORD93	TSS1500	shore	TSS1500-shore	chr7:22893794-22894577	NA	NA
cg10399824	-0.154141	0.849063	-13.8946	5.42314e-20	6.03655e-17	35.2349	0.926134	0.771993	-0.154141	10	121048354	F	II	GRK5	Body	opensea	Body-opensea		NA	TRUE
cg09494609	0.246689	0.254608	13.8867	5.5628e-20	6.15779e-17	35.2098	0.131263	0.377952	0.246689	12	53448180	F	II	TENC1	Body	island	Body-island	chr12:53448008-53448406	NA	NA	high-CpG:51734434-51734495
cg18706476	0.345839	0.779161	13.8761	5.75467e-20	6.30056e-17	35.1764	0.606242	0.952081	0.345839	3	49940245	R	I	MST1R	1stExon	island	1stExon-island	chr3:49940099-49940431	NA	TRUE
cg13505279	0.252113	0.318719	13.8679	5.90621e-20	6.44886e-17	35.1507	0.192663	0.444776	0.252113	15	55611881	R	II	PIGB	Body	shore	Body-shore	chr15:55611085-55611608	NA	NA
cg03915012	-0.168924	0.84832	-13.8657	5.94805e-20	6.47689e-17	35.1437	0.932781	0.763858	-0.168924	4	902074	F	II	GAK	Body	shelf	Body-shelf	chr4:898030-898532	NA	TRUE
cg03849279	-0.148951	0.85736	-13.8563	6.12964e-20	6.63854e-17	35.1141	0.931835	0.782884	-0.148951	16	67751821	R	II	GFOD2	5'UTR	shore	5'UTR-shore	chr16:67752849-67753446	NA	NA
cg11786839	-0.171212	0.804115	-13.8544	6.16759e-20	6.65249e-17	35.108	0.889721	0.718509	-0.171212	6	1635578	F	II	GMDS	Body	opensea	Body-opensea		NA	NA
cg01839430	0.22749	0.224294	13.854	6.17572e-20	6.65249e-17	35.1067	0.110549	0.338039	0.22749	2	216177098	R	II	ATIC	Body	island	Body-island	chr2:216176549-216177132	NA	NA
cg09395443	-0.244673	0.686167	-13.8525	6.20439e-20	6.66546e-17	35.1021	0.808504	0.56383	-0.244673	7	4746437	R	II	FOXK1	Body	opensea	Body-opensea		NA	TRUE
cg18077971	-0.426781	0.396076	-13.8485	6.28398e-20	6.71858e-17	35.0895	0.609466	0.182685	-0.426781	2	223164867	F	I	PAX3	TSS1500	shore	TSS1500-shore	chr2:223162946-223163912	NA	TRUE		rs45506598
cg17221941	-0.22626	0.790958	-13.8475	6.30404e-20	6.71858e-17	35.0864	0.904088	0.677828	-0.22626	1	10730684	F	II	CASZ1	Body	opensea	Body-opensea		NA	NA
cg27149973	0.339824	0.362637	13.8463	6.32942e-20	6.72763e-17	35.0824	0.192725	0.532549	0.339824	17	74868725	R	II	MGAT5B	Body	shelf	Body-shelf	chr17:74864170-74866657	TRUE	TRUE
cg26213458	0.354144	0.611965	13.8354	6.55477e-20	6.9304e-17	35.0479	0.434893	0.789037	0.354144	12	5918191	R	II	ANO2	Body	opensea	Body-opensea		TRUE	TRUE
cg09969043	0.370994	0.372818	13.826	6.75443e-20	7.1119e-17	35.0182	0.187321	0.558314	0.370994	15	96868971	R	II	NR2F2	TSS200	shelf	TSS200-shelf	chr15:96864881-96866787	NA	TRUE
cg18817426	-0.136352	0.133397	-13.8256	6.76193e-20	7.1119e-17	35.0171	0.201573	0.0652211	-0.136352	15	75230435	R	I	COX5A	5'UTR	island	5'UTR-island	chr15:75229782-75230660	NA	NA	high-CpG:73017409-73017538
cg18675097	-0.345471	0.517332	-13.8155	6.98453e-20	7.32679e-17	34.9852	0.690068	0.344596	-0.345471	6	28227127	F	I	NKAPL	5'UTR	island	5'UTR-island	chr6:28226979-28227483	NA	NA		rs41269289
cg20942867	0.148615	0.177038	13.8124	7.05393e-20	7.38027e-17	34.9754	0.102731	0.251345	0.148615	1	27426144	F	I	SLC9A1	3'UTR	opensea	3'UTR-opensea		TRUE	TRUE
cg13014333	0.245673	0.189212	13.8057	7.209e-20	7.52288e-17	34.9539	0.0663751	0.312048	0.245673	6	31762776	F	II	VARS	Body	shore	Body-shore	chr6:31763240-31763905	NA	NA
cg10896774	0.25387	0.340497	13.7958	7.44044e-20	7.73499e-17	34.9227	0.213561	0.467432	0.25387	7	142636840	F	II	C7orf34	1stExon	opensea	1stExon-opensea		NA	NA		rs6943031
cg27080119	0.244885	0.218226	13.7896	7.58903e-20	7.83781e-17	34.9032	0.0957835	0.340669	0.244885	4	120987409	F	II	MAD2L1	Body	shore	Body-shore	chr4:120987617-120988156	NA	NA
cg11229513	-0.359508	0.34565	-13.7844	7.71678e-20	7.94926e-17	34.8867	0.525404	0.165896	-0.359508	8	70984559	R	I	PRDM14	TSS1500	island	TSS1500-island	chr8:70981873-70984888	TRUE	NA
cg16000989	-0.180242	0.76323	-13.7819	7.78085e-20	7.99471e-17	34.8786	0.853351	0.673109	-0.180242	4	41983716	F	I	DCAF4L1	5'UTR	shore	5'UTR-shore	chr4:41983922-41984183	NA	NA
cg10881937	-0.129308	0.861514	-13.7808	7.80753e-20	8.0016e-17	34.8752	0.926168	0.79686	-0.129308	2	135064869	R	II	MGAT5	Body	opensea	Body-opensea		NA	TRUE
cg14523847	-0.373924	0.357096	-13.769	8.10819e-20	8.26744e-17	34.8379	0.544058	0.170134	-0.373924	7	153584597	R	I	DPP6	1stExon	island	1stExon-island	chr7:153583317-153585666	NA	NA
cg01198033	-0.390238	0.517573	-13.7676	8.14536e-20	8.28427e-17	34.8334	0.712692	0.322454	-0.390238	7	155302342	R	II	CNPY1	5'UTR	island	5'UTR-island	chr7:155302253-155303158	NA	NA
cg18944010	-0.396812	0.387412	-13.7562	8.44767e-20	8.52808e-17	34.7974	0.585818	0.189006	-0.396812	1	119522855	F	II	TBX15	5'UTR	shore	5'UTR-shore	chr1:119522385-119522638	NA	NA
cg00097800	-0.281534	0.792635	-13.7472	8.69791e-20	8.73538e-17	34.7686	0.933402	0.651867	-0.281534	2	46593258	R	II	EPAS1	Body	opensea	Body-opensea		NA	TRUE
cg24281267	-0.333089	0.46472	-13.7432	8.80859e-20	8.78982e-17	34.7561	0.631264	0.298176	-0.333089	6	35479648	F	I	TULP1	Body	island	Body-island	chr6:35479388-35479678	NA	TRUE
cg18115040	-0.343315	0.359444	-13.7429	8.81792e-20	8.78982e-17	34.755	0.531101	0.187786	-0.343315	2	176981328	R	I	HOXD10	TSS200	island	TSS200-island	chr2:176980765-176981423	TRUE	NA			rs79175736
cg23209302	-0.160432	0.848484	-13.7412	8.86588e-20	8.8157e-17	34.7497	0.928701	0.768268	-0.160432	1	1326152	R	II	CCNL2	Body	shelf	Body-shelf	chr1:1322644-1322924	NA	NA
cg08726667	-0.362585	0.592183	-13.7295	9.20446e-20	9.0955e-17	34.7127	0.773475	0.41089	-0.362585	16	28573379	R	II	CCDC101	5'UTR	opensea	5'UTR-opensea		NA	TRUE
cg21686287	-0.342874	0.621965	-13.7292	9.21537e-20	9.0955e-17	34.7115	0.793402	0.450528	-0.342874	2	73021348	R	II	EXOC6B	Body	opensea	Body-opensea		NA	TRUE
cg01434649	-0.262735	0.474764	-13.7257	9.32022e-20	9.13151e-17	34.7003	0.606132	0.343396	-0.262735	1	3567870	R	I	TP73	TSS1500	island	TSS1500-island	chr1:3566445-3569636	NA	NA
cg00746143	-0.188995	0.773213	-13.7206	9.47316e-20	9.25872e-17	34.6843	0.867711	0.678716	-0.188995	3	194959645	F	II	C3orf21	Body	opensea	Body-opensea		NA	TRUE
cg26149682	-0.268339	0.402943	-13.7138	9.68252e-20	9.44031e-17	34.6627	0.537112	0.268773	-0.268339	6	10417663	F	I	TFAP2A	Body	island	Body-island	chr6:10417384-10417842	NA	TRUE
cg24411043	0.252219	0.304525	13.713	9.70864e-20	9.44281e-17	34.66	0.178415	0.430634	0.252219	1	161008297	R	II	TSTD1	Body	shore	Body-shore	chr1:161008377-161008830	TRUE	NA
cg12472483	-0.258703	0.328639	-13.706	9.9269e-20	9.63172e-17	34.6381	0.45799	0.199287	-0.258703	7	157996945	F	I	PTPRN2	Body	island	Body-island	chr7:157996642-157997027	NA	NA
cg22820316	-0.370921	0.486623	-13.6934	1.03381e-19	1.00065e-16	34.598	0.672083	0.301162	-0.370921	1	119532736	R	II	TBX15	TSS1500	shore	TSS1500-shore	chr1:119531991-119532196	NA	NA
cg16919569	-0.354524	0.448261	-13.6894	1.04741e-19	1.00893e-16	34.5851	0.625523	0.270999	-0.354524	4	174452835	F	I	NBLA00301	Body	island	Body-island	chr4:174451828-174452962	NA	NA
cg22541254	-0.366825	0.337801	-13.6803	1.07847e-19	1.03389e-16	34.5562	0.521214	0.154388	-0.366825	6	101846779	R	II	GRIK2	TSS200	island	TSS200-island	chr6:101846766-101847135	NA	NA
cg23838005	0.350372	0.419001	13.6708	1.11214e-19	1.06362e-16	34.5259	0.243815	0.594187	0.350372	17	74868604	R	II	MGAT5B	Body	shore	Body-shore	chr17:74864170-74866657	TRUE	TRUE
cg04559779	-0.422922	0.381658	-13.667	1.12562e-19	1.07356e-16	34.514	0.593119	0.170197	-0.422922	8	65291730	R	II	MIR124-2	Body	shore	Body-shore	chr8:65290108-65290946	NA	NA
cg04834502	0.184188	0.154632	13.6664	1.1279e-19	1.07356e-16	34.512	0.0625382	0.246726	0.184188	16	48644360	F	II	N4BP1	TSS1500	shore	TSS1500-shore	chr16:48643589-48643860	NA	NA
cg10168149	-0.380101	0.259979	-13.6563	1.16504e-19	1.10367e-16	34.48	0.45003	0.069929	-0.380101	2	200335558	F	I	FLJ32063	Body	island	Body-island	chr2:200335497-200336413	NA	NA
cg23371746	-0.35399	0.374696	-13.6519	1.18199e-19	1.11709e-16	34.4657	0.551691	0.1977	-0.35399	1	119532925	R	I	TBX15	TSS1500	shore	TSS1500-shore	chr1:119531991-119532196	NA	NA
cg12231340	-0.212775	0.762118	-13.6507	1.18634e-19	1.11856e-16	34.4621	0.868506	0.655731	-0.212775	12	52685221	F	II	KRT81	1stExon	island	1stExon-island	chr12:52684945-52685222	NA	NA
cg00781839	-0.17005	0.878428	-13.6481	1.19625e-19	1.12471e-16	34.4539	0.963453	0.793403	-0.17005	13	114127083	F	II	DCUN1D2	Body	opensea	Body-opensea		NA	NA
cg01552919	-0.204609	0.698892	-13.6398	1.22888e-19	1.15055e-16	34.4273	0.801196	0.596587	-0.204609	4	901847	R	I	GAK	Body	shore	Body-shore	chr4:899774-899985	NA	TRUE
cg10477621	-0.360377	0.371044	-13.6373	1.23906e-19	1.15738e-16	34.4191	0.551233	0.190856	-0.360377	7	19184950	R	I	FERD3L	1stExon	island	1stExon-island	chr7:19184818-19185033	NA	TRUE
cg01405040	-0.420368	0.322818	-13.632	1.26033e-19	1.17178e-16	34.4023	0.533001	0.112634	-0.420368	2	176964137	R	I	HOXD12	TSS1500	island	TSS1500-island	chr2:176964062-176965509	NA	TRUE
cg23023126	-0.220823	0.781212	-13.6305	1.26653e-19	1.17482e-16	34.3975	0.891624	0.670801	-0.220823	19	308808	R	I	MIER2	Body	island	Body-island	chr19:308413-308930	NA	NA
cg13840445	-0.258015	0.582073	-13.626	1.28484e-19	1.18632e-16	34.3833	0.71108	0.453065	-0.258015	6	53530628	R	I	KLHL31	TSS200	opensea	TSS200-opensea		NA	NA
cg05958294	-0.152077	0.821943	-13.6195	1.31233e-19	1.20338e-16	34.3624	0.897982	0.745905	-0.152077	13	113834216	R	II	PCID2	Body	opensea	Body-opensea		NA	TRUE
cg13080565	-0.355346	0.3704	-13.6136	1.33728e-19	1.21899e-16	34.3438	0.548073	0.192727	-0.355346	6	101846797	R	I	GRIK2	TSS200	island	TSS200-island	chr6:101846766-101847135	NA	NA
cg06972019	0.287132	0.283265	13.6125	1.34229e-19	1.21899e-16	34.3401	0.139699	0.426831	0.287132	1	8937448	F	II	ENO1	5'UTR	shore	5'UTR-shore	chr1:8938098-8939409	NA	NA
cg01901332	-0.236893	0.716808	-13.612	1.34414e-19	1.21899e-16	34.3387	0.835254	0.598361	-0.236893	11	75031054	R	II	ARRB1	Body	opensea	Body-opensea		NA	TRUE
cg22031964	-0.269367	0.751978	-13.6119	1.34457e-19	1.21899e-16	34.3384	0.886661	0.617294	-0.269367	11	62677251	R	I	CHRM1	Body	opensea	Body-opensea		NA	TRUE
cg04576707	-0.129987	0.842852	-13.609	1.35744e-19	1.22511e-16	34.329	0.907846	0.777859	-0.129987	4	71811504	R	II	MOBKL1A	Body	opensea	Body-opensea		NA	TRUE
cg04276626	0.404399	0.412308	13.6077	1.36304e-19	1.2274e-16	34.3249	0.210108	0.614508	0.404399	17	57918500	F	II	MIR21	TSS200	opensea	TSS200-opensea		NA	NA
cg08092105	0.234232	0.260122	13.6066	1.36796e-19	1.22908e-16	34.3214	0.143006	0.377238	0.234232	16	58535384	R	I	NDRG4	Body	island	Body-island	chr16:58535040-58535596	TRUE	NA
cg14565725	-0.345	0.40178	-13.5963	1.41402e-19	1.26762e-16	34.2887	0.57428	0.22928	-0.345	1	119532044	R	I	TBX15	1stExon	island	1stExon-island	chr1:119531991-119532196	NA	TRUE
cg02597246	-0.218926	0.679901	-13.5934	1.42736e-19	1.27672e-16	34.2794	0.789364	0.570438	-0.218926	16	81711959	F	I	CMIP	Body	island	Body-island	chr16:81711864-81712214	NA	NA
cg13386070	0.319839	0.662511	13.5839	1.47186e-19	1.31269e-16	34.2491	0.502591	0.82243	0.319839	1	175046885	R	II	TNN	Body	shore	Body-shore	chr1:175048550-175048874	NA	NA
cg03091551	-0.41117	0.364654	-13.5835	1.47412e-19	1.31269e-16	34.2476	0.570239	0.159069	-0.41117	14	57275967	R	II	OTX2	5'UTR	island	5'UTR-island	chr14:57274607-57276840	NA	NA
cg16665506	-0.139208	0.886493	-13.5732	1.52413e-19	1.35121e-16	34.2146	0.956097	0.816889	-0.139208	3	129326828	F	II	PLXND1	TSS1500	shore	TSS1500-shore	chr3:129323915-129325332	NA	NA
cg05570654	-0.144533	0.822377	-13.5691	1.54425e-19	1.36603e-16	34.2017	0.894643	0.75011	-0.144533	2	240259075	R	II	HDAC4	Body	opensea	Body-opensea		NA	TRUE
cg01485547	-0.187311	0.78114	-13.5592	1.59441e-19	1.4042e-16	34.1701	0.874795	0.687484	-0.187311	6	10555264	F	II	GCNT2	TSS1500	opensea	TSS1500-opensea		NA	TRUE		rs56209305	rs55932988
cg16739441	-0.408517	0.471351	-13.5572	1.60509e-19	1.41051e-16	34.1635	0.67561	0.267092	-0.408517	12	21926524	F	II	KCNJ8	Body	opensea	Body-opensea		NA	NA
cg02356223	-0.126716	0.852741	-13.544	1.67488e-19	1.46541e-16	34.1215	0.9161	0.789383	-0.126716	5	336337	R	II	AHRR	Body	opensea	Body-opensea		NA	TRUE
cg14564076	-0.437439	0.336926	-13.5419	1.68616e-19	1.47206e-16	34.1148	0.555645	0.118206	-0.437439	7	153584873	F	II	DPP6	Body	island	Body-island	chr7:153583317-153585666	NA	NA
cg21907579	-0.438039	0.345791	-13.5251	1.7808e-19	1.55131e-16	34.0609	0.56481	0.126771	-0.438039	12	114845868	F	II	TBX5	1stExon	island	1stExon-island	chr12:114845861-114847650	NA	TRUE		rs78462880
cg11493223	0.244101	0.256012	13.5213	1.80259e-19	1.56349e-16	34.0489	0.133962	0.378062	0.244101	17	76128522	F	I	TMC8	Body	shore	Body-shore	chr17:76127521-76128406	NA	NA			rs61755873
cg14205001	-0.166067	0.818216	-13.5122	1.8569e-19	1.60366e-16	34.0195	0.901249	0.735182	-0.166067	9	139406515	R	II	NOTCH1	Body	shore	Body-shore	chr9:139405089-139405292	NA	NA
cg16990168	-0.371664	0.527532	-13.5102	1.86891e-19	1.61055e-16	34.0132	0.713364	0.3417	-0.371664	1	119526060	F	II	TBX15	5'UTR	shore	5'UTR-shore	chr1:119526782-119527192	NA	NA
cg16209664	-0.294813	0.370495	-13.5076	1.88457e-19	1.61981e-16	34.0049	0.517902	0.223088	-0.294813	3	147131146	R	II	ZIC1	Body	island	Body-island	chr3:147131066-147131333	NA	NA
cg02331025	-0.19037	0.77057	-13.5067	1.89041e-19	1.61981e-16	34.0019	0.865755	0.675385	-0.19037	5	37835965	R	II	GDNF	TSS1500	shore	TSS1500-shore	chr5:37836747-37840726	NA	TRUE
cg06840930	0.252349	0.538503	13.5045	1.90401e-19	1.62681e-16	33.9948	0.412329	0.664678	0.252349	17	38642659	F	I	TNS4	Body	opensea	Body-opensea		TRUE	TRUE
cg00886954	0.180136	0.156213	13.4839	2.03514e-19	1.73515e-16	33.929	0.0661448	0.24628	0.180136	8	145047713	F	I	PLEC1	Body	island	Body-island	chr8:145047293-145052305	TRUE	NA
cg23342625	0.362756	0.724455	13.479	2.06808e-19	1.75949e-16	33.9131	0.543077	0.905833	0.362756	6	20877340	F	II	CDKAL1	Body	opensea	Body-opensea		NA	TRUE		rs78716799
cg24301620	-0.300105	0.378734	-13.4709	2.12344e-19	1.79895e-16	33.887	0.528787	0.228681	-0.300105	6	101846872	F	I	GRIK2	1stExon	island	1stExon-island	chr6:101846766-101847135	NA	NA
cg24305156	-0.29591	0.513508	-13.4693	2.13429e-19	1.80433e-16	33.882	0.661463	0.365553	-0.29591	11	45871936	F	II	CRY2	Body	shelf	Body-shelf	chr11:45868742-45869413	NA	NA
cg05371578	-0.351248	0.507897	-13.464	2.1713e-19	1.83016e-16	33.865	0.683521	0.332273	-0.351248	3	147128157	F	II	ZIC1	1stExon	island	1stExon-island	chr3:147126988-147128999	NA	TRUE	high-CpG:148610539-148610905
cg07704934	-0.302228	0.286677	-13.4636	2.17398e-19	1.83016e-16	33.8638	0.437791	0.135563	-0.302228	11	44332940	F	I	ALX4	TSS1500	shore	TSS1500-shore	chr11:44330542-44331761	TRUE	NA		rs2054030
cg24021846	0.342598	0.564277	13.4618	2.18689e-19	1.83717e-16	33.858	0.392978	0.735575	0.342598	7	103556529	F	II	RELN	Body	opensea	Body-opensea		NA	TRUE
cg14200127	0.33468	0.471876	13.4589	2.20763e-19	1.85071e-16	33.8486	0.304536	0.639216	0.33468	1	97604182	F	II	DPYD	Body	opensea	Body-opensea		NA	TRUE			rs76208521
cg10189882	-0.171113	0.823589	-13.4561	2.22798e-19	1.85999e-16	33.8396	0.909146	0.738033	-0.171113	8	665934	R	II	ERICH1	Body	shore	Body-shore	chr8:663998-664794	NA	TRUE
cg11936643	0.274075	0.259812	13.4529	2.25072e-19	1.87507e-16	33.8295	0.122775	0.39685	0.274075	10	116286411	R	II	ABLIM1	Body	opensea	Body-opensea		TRUE	TRUE
cg04623270	-0.205003	0.723681	-13.4348	2.38775e-19	1.98099e-16	33.7711	0.826183	0.62118	-0.205003	16	58150017	F	II	C16orf80	Body	opensea	Body-opensea		NA	TRUE
cg21341586	0.314979	0.254999	13.43	2.42529e-19	2.00798e-16	33.7557	0.0975093	0.412489	0.314979	4	99851281	R	II	EIF4E	5'UTR	shore	5'UTR-shore	chr4:99849305-99850552	NA	NA
cg12426196	0.207371	0.250113	13.4278	2.44281e-19	2.01806e-16	33.7486	0.146428	0.353799	0.207371	1	161008826	F	I	TSTD1	TSS200	island	TSS200-island	chr1:161008377-161008830	TRUE	NA		rs6656547
cg21862081	0.355232	0.646093	13.4176	2.52465e-19	2.06617e-16	33.7161	0.468477	0.823709	0.355232	14	77769687	R	II	POMT2	Body	opensea	Body-opensea		NA	TRUE
cg20801476	-0.331811	0.446998	-13.4174	2.52652e-19	2.06617e-16	33.7153	0.612903	0.281092	-0.331811	7	27281465	R	II	EVX1	TSS1500	shore	TSS1500-shore	chr7:27282086-27283136	NA	TRUE
cg24724664	-0.303385	0.531788	-13.4107	2.58233e-19	2.10323e-16	33.6937	0.68348	0.380095	-0.303385	2	172945383	F	II	MAP1D	3'UTR	island	3'UTR-island	chr2:172944988-172945384	NA	TRUE
cg15371566	0.28235	0.588535	13.402	2.65606e-19	2.14722e-16	33.6659	0.447361	0.72971	0.28235	3	170187722	R	II	SLC7A14	Body	opensea	Body-opensea		NA	TRUE
cg12776902	-0.197469	0.820513	-13.4018	2.65778e-19	2.14722e-16	33.6653	0.919247	0.721778	-0.197469	4	144452479	F	II	SMARCA5	Body	opensea	Body-opensea		NA	TRUE
cg05514299	0.387236	0.452648	13.392	2.74426e-19	2.21263e-16	33.6336	0.25903	0.646266	0.387236	17	74868670	R	II	MGAT5B	Body	shelf	Body-shelf	chr17:74864170-74866657	TRUE	TRUE
cg02490942	-0.185946	0.832685	-13.3618	3.02854e-19	2.42718e-16	33.5363	0.925657	0.739712	-0.185946	13	113491766	F	I	ATP11A	Body	shore	Body-shore	chr13:113492486-113492836	NA	NA
cg03137826	-0.169472	0.838151	-13.3532	3.11474e-19	2.48633e-16	33.5085	0.922887	0.753415	-0.169472	1	10720368	F	II	CASZ1	Body	island	Body-island	chr1:10719867-10720581	NA	NA
cg23497016	-0.399683	0.347741	-13.3503	3.14453e-19	2.50511e-16	33.4991	0.547582	0.147899	-0.399683	2	66666684	F	II	MEIS1	Body	opensea	Body-opensea		NA	NA		rs79836955
cg23411036	-0.179492	0.632254	-13.3428	3.22238e-19	2.56204e-16	33.4749	0.721999	0.542508	-0.179492	13	115085339	F	II	ZNF828	5'UTR	opensea	5'UTR-opensea		NA	TRUE
cg12815355	-0.277771	0.721497	-13.3396	3.25619e-19	2.57787e-16	33.4646	0.860383	0.582612	-0.277771	2	75894077	F	II	C2orf3	Body	opensea	Body-opensea		NA	TRUE
cg27294813	0.293096	0.71799	13.3391	3.26158e-19	2.57787e-16	33.463	0.571442	0.864538	0.293096	2	109791599	F	II	SH3RF3	Body	opensea	Body-opensea		NA	TRUE
cg13974464	0.212718	0.28086	13.3376	3.27671e-19	2.58472e-16	33.4584	0.174501	0.387219	0.212718	19	49224165	R	I	MAMSTR	TSS1500	island	TSS1500-island	chr19:49223833-49224276	NA	NA
cg06083330	-0.377281	0.269317	-13.3321	3.33687e-19	2.627e-16	33.4404	0.457958	0.0806768	-0.377281	4	147561203	F	I	POU4F2	Body	island	Body-island	chr4:147559205-147561901	NA	TRUE
cg02909991	0.183478	0.21238	13.3298	3.3618e-19	2.64145e-16	33.4331	0.120641	0.304119	0.183478	17	76127829	R	II	TMC8	Body	island	Body-island	chr17:76127521-76128406	NA	NA
cg06158650	-0.428849	0.344438	-13.3284	3.37724e-19	2.64839e-16	33.4286	0.558862	0.130013	-0.428849	1	119522637	F	II	TBX15	5'UTR	island	5'UTR-island	chr1:119522385-119522638	NA	NA
cg12978582	0.260636	0.691269	13.324	3.4257e-19	2.68114e-16	33.4145	0.560951	0.821587	0.260636	7	44150888	F	II	AEBP1	Body	shore	Body-shore	chr7:44152227-44152505	NA	NA
cg00121884	-0.121969	0.876278	-13.3164	3.51224e-19	2.73286e-16	33.3898	0.937262	0.815294	-0.121969	20	3799732	R	II	C20orf29	TSS1500	shore	TSS1500-shore	chr20:3800761-3801546	NA	NA
cg14264194	-0.270787	0.412373	-13.315	3.52789e-19	2.73971e-16	33.3854	0.547766	0.276979	-0.270787	1	211652549	R	I	RD3	Body	island	Body-island	chr1:211652306-211652754	NA	NA
cg18908419	-0.344985	0.573667	-13.3122	3.56124e-19	2.76027e-16	33.3761	0.746159	0.401175	-0.344985	10	75800004	R	II	VCL	Body	opensea	Body-opensea		NA	TRUE
cg26980034	-0.241331	0.652637	-13.3073	3.61845e-19	2.79919e-16	33.3604	0.773303	0.531972	-0.241331	6	53530624	R	I	KLHL31	TSS200	opensea	TSS200-opensea		NA	NA
cg05050341	-0.160016	0.833555	-13.3009	3.69468e-19	2.85265e-16	33.3398	0.913563	0.753547	-0.160016	9	130617534	F	II	ENG	TSS1500	shore	TSS1500-shore	chr9:130616619-130616858	NA	NA
cg13625187	-0.131702	0.870257	-13.2988	3.71956e-19	2.86634e-16	33.3332	0.936108	0.804406	-0.131702	12	27736287	F	II	PPFIBP1	5'UTR	opensea	5'UTR-opensea		NA	TRUE		rs16932206
cg15834072	-0.341447	0.31609	-13.2848	3.89436e-19	2.99528e-16	33.2878	0.486813	0.145366	-0.341447	4	155411603	F	I	DCHS2	1stExon	island	1stExon-island	chr4:155410623-155413393	NA	NA		rs13130030
cg26388152	0.222299	0.17795	13.277	3.99495e-19	3.06677e-16	33.2626	0.0668005	0.2891	0.222299	17	27944453	R	II	CORO6	Body	island	Body-island	chr17:27942532-27945388	TRUE	NA
cg22400703	-0.332869	0.450508	-13.2731	4.04588e-19	3.09992e-16	33.25	0.616943	0.284074	-0.332869	2	68545995	F	I	CNRIP1	Body	shore	Body-shore	chr2:68546339-68547111	NA	NA
cg19409133	0.298048	0.410121	13.2698	4.09087e-19	3.12246e-16	33.2391	0.261097	0.559145	0.298048	1	28843744	F	II	SNHG3-RCC1	Body	shore	Body-shore	chr1:28844653-28845293	NA	NA		rs12239131
cg02090418	-0.156876	0.831081	-13.2654	4.14989e-19	3.16148e-16	33.225	0.909519	0.752643	-0.156876	4	113333269	F	I	ALPK1	Body	island	Body-island	chr4:113332941-113333323	NA	TRUE		rs34847576
cg16326402	-0.192433	0.763845	-13.247	4.40775e-19	3.33259e-16	33.1654	0.860062	0.667629	-0.192433	2	158698856	R	II	ACVR1	5'UTR	opensea	5'UTR-opensea		NA	TRUE
cg06640630	-0.251115	0.714272	-13.245	4.43599e-19	3.34133e-16	33.1591	0.83983	0.588714	-0.251115	1	211652276	R	II	RD3	3'UTR	shore	3'UTR-shore	chr1:211652306-211652754	NA	NA
cg17107572	-0.376579	0.345289	-13.2417	4.48446e-19	3.3715e-16	33.1483	0.533578	0.156999	-0.376579	2	66667590	F	II	MEIS1	Body	opensea	Body-opensea		NA	TRUE
cg02026535	-0.149097	0.832529	-13.2406	4.5012e-19	3.37775e-16	33.1446	0.907078	0.757981	-0.149097	19	7580217	F	II	ZNF358	TSS1500	shore	TSS1500-shore	chr19:7580824-7581415	NA	NA
cg26537478	-0.269607	0.412372	-13.2372	4.55205e-19	3.40316e-16	33.1335	0.547176	0.277568	-0.269607	2	66668012	R	I	MEIS1	Body	opensea	Body-opensea		NA	TRUE
cg23285459	-0.228407	0.63621	-13.2246	4.74297e-19	3.50452e-16	33.0929	0.750414	0.522006	-0.228407	7	2802560	F	I	GNA12	Body	island	Body-island	chr7:2802440-2802698	NA	TRUE			rs75012075
cg22070406	-0.351981	0.300281	-13.2083	5.00351e-19	3.67216e-16	33.0401	0.476272	0.124291	-0.351981	18	55019708	R	II	ST8SIA3	TSS200	island	TSS200-island	chr18:55019707-55021605	NA	NA
cg23972738	-0.406618	0.456433	-13.2072	5.02201e-19	3.679e-16	33.0364	0.659741	0.253124	-0.406618	2	66667039	R	II	MEIS1	Body	opensea	Body-opensea		NA	NA
cg25640519	-0.358638	0.378609	-13.1985	5.16752e-19	3.76599e-16	33.0082	0.557928	0.199291	-0.358638	3	141516705	F	I	GRK7	Body	shore	Body-shore	chr3:141516055-141516639	NA	NA		rs77398751
cg26509691	-0.370426	0.339456	-13.1984	5.16895e-19	3.76599e-16	33.0079	0.524669	0.154244	-0.370426	5	134363516	R	II	PITX1	3'UTR	island	3'UTR-island	chr5:134363092-134365146	NA	TRUE
cg18786873	-0.350037	0.252883	-13.1936	5.25073e-19	3.79913e-16	32.9924	0.427901	0.0778643	-0.350037	1	110610899	R	I	ALX3	Body	island	Body-island	chr1:110610265-110613303	NA	TRUE
cg27125965	-0.149567	0.849153	-13.1935	5.25236e-19	3.79913e-16	32.9921	0.923937	0.77437	-0.149567	19	11707246	R	II	ZNF627	TSS1500	shore	TSS1500-shore	chr19:11708277-11708683	NA	NA
cg00300672	0.30456	0.542404	13.1922	5.27465e-19	3.80838e-16	32.9879	0.390124	0.694684	0.30456	2	125077436	R	II	CNTNAP5	Body	opensea	Body-opensea		NA	TRUE
cg19072291	-0.265935	0.528979	-13.1889	5.33259e-19	3.84329e-16	32.9771	0.661946	0.396011	-0.265935	7	65617362	F	I	CRCP	3'UTR	opensea	3'UTR-opensea		NA	TRUE
cg06183338	-0.389374	0.30668	-13.1878	5.35144e-19	3.84995e-16	32.9736	0.501368	0.111993	-0.389374	5	178004204	F	I	COL23A1	Body	island	Body-island	chr5:178003623-178004247	NA	NA
cg20971488	-0.18154	0.779123	-13.1862	5.38094e-19	3.86424e-16	32.9682	0.869893	0.688353	-0.18154	1	228786295	R	I	DUSP5P	Body	shore	Body-shore	chr1:228785986-228786204	NA	NA			rs77648740
cg02164046	-0.328645	0.290262	-13.1839	5.42193e-19	3.8738e-16	32.9607	0.454585	0.12594	-0.328645	3	187388148	F	I	SST	1stExon	island	1stExon-island	chr3:187387914-187388176	NA	TRUE
cg22620221	-0.344227	0.315019	-13.1816	5.46327e-19	3.89544e-16	32.9532	0.487133	0.142906	-0.344227	7	153584416	F	I	DPP6	TSS200	island	TSS200-island	chr7:153583317-153585666	NA	NA	high-CpG:153215316-153215503
cg01261503	0.202842	0.177731	13.1767	5.55155e-19	3.94435e-16	32.9373	0.0763099	0.279152	0.202842	17	62493599	R	II	POLG2	TSS1500	shore	TSS1500-shore	chr17:62492882-62493323	NA	NA
cg07300534	-0.162588	0.822097	-13.1666	5.73888e-19	4.06304e-16	32.9045	0.903391	0.740803	-0.162588	16	81726931	R	II	CMIP	Body	opensea	Body-opensea		TRUE	TRUE
cg17514088	-0.144556	0.846543	-13.164	5.78829e-19	4.09079e-16	32.8961	0.918821	0.774265	-0.144556	17	76503074	R	II	DNAH17	Body	shelf	Body-shelf	chr17:76498807-76499075	NA	NA
cg21051964	-0.223373	0.790091	-13.1622	5.82115e-19	4.10677e-16	32.8905	0.901778	0.678405	-0.223373	12	58022620	R	I	B4GALNT1	Body	shore	Body-shore	chr12:58021294-58022037	NA	NA
cg13916459	-0.347951	0.388393	-13.1463	6.13372e-19	4.31306e-16	32.8388	0.562368	0.214418	-0.347951	12	85673221	F	I	ALX1	TSS1500	shore	TSS1500-shore	chr12:85673878-85674700	NA	NA
cg17897352	-0.214752	0.725199	-13.1463	6.13508e-19	4.31306e-16	32.8385	0.832575	0.617824	-0.214752	10	121011644	F	II	GRK5	Body	opensea	Body-opensea		NA	TRUE
cg23758305	-0.417966	0.291058	-13.1404	6.25494e-19	4.38195e-16	32.8194	0.500041	0.0820748	-0.417966	8	70982867	F	II	PRDM14	5'UTR	island	5'UTR-island	chr8:70981873-70984888	TRUE	NA		rs78632565
cg00366850	-0.438575	0.480465	-13.1388	6.28735e-19	4.39697e-16	32.8143	0.699752	0.261177	-0.438575	2	45232417	R	II	SIX2	3'UTR	island	3'UTR-island	chr2:45231781-45232550	NA	NA
cg16529477	-0.386247	0.397878	-13.1298	6.47771e-19	4.50492e-16	32.7848	0.591002	0.204755	-0.386247	2	223164854	F	I	PAX3	TSS1500	shore	TSS1500-shore	chr2:223162946-223163912	NA	TRUE		rs45495693	rs71781305
cg04360793	-0.417685	0.471871	-13.1294	6.48488e-19	4.50492e-16	32.7837	0.680714	0.263029	-0.417685	1	79472361	R	I	ELTD1	5'UTR	island	5'UTR-island	chr1:79472281-79472537	NA	TRUE
cg19586165	-0.151693	0.790109	-13.1293	6.48668e-19	4.50492e-16	32.7835	0.865955	0.714262	-0.151693	17	37814072	R	I	STARD3	Body	opensea	Body-opensea		NA	NA
cg23049737	-0.193775	0.7518	-13.127	6.53607e-19	4.51591e-16	32.776	0.848688	0.654912	-0.193775	1	8412697	F	I	RERE	3'UTR	opensea	3'UTR-opensea		NA	NA
cg19247475	-0.244591	0.672418	-13.1137	6.82927e-19	4.69403e-16	32.7326	0.794713	0.550123	-0.244591	5	140789745	F	II	PCDHGA4	Body	island	Body-island	chr5:140789094-140789762	NA	NA
cg09557462	-0.383239	0.363447	-13.1083	6.95246e-19	4.77052e-16	32.7149	0.555067	0.171828	-0.383239	8	26721736	R	II	ADRA1A	1stExon	island	1stExon-island	chr8:26721642-26724566	NA	TRUE
cg27369542	-0.245177	0.731106	-13.1041	7.04965e-19	4.82894e-16	32.7012	0.853694	0.608517	-0.245177	17	14207890	R	II	HS3ST3B1	Body	shore	Body-shore	chr17:14204168-14207702	NA	NA
cg06422947	-0.15229	0.846872	-13.0903	7.3766e-19	5.03568e-16	32.6564	0.923017	0.770726	-0.15229	17	41167707	R	II	VAT1	3'UTR	opensea	3'UTR-opensea		NA	NA
cg15012282	-0.289875	0.708287	-13.0859	7.48438e-19	5.10045e-16	32.642	0.853225	0.56335	-0.289875	3	152059421	R	II	TMEM14E	TSS1500	opensea	TSS1500-opensea		NA	NA
cg02925039	-0.355701	0.412943	-13.0835	7.54412e-19	5.11537e-16	32.6342	0.590794	0.235092	-0.355701	12	43945213	R	II	ADAMTS20	Body	island	Body-island	chr12:43944719-43946285	NA	TRUE			rs74084055
cg22829917	-0.358463	0.349688	-13.0825	7.5683e-19	5.11537e-16	32.631	0.528919	0.170456	-0.358463	12	54357408	F	II	HOTAIR	Body	shore	Body-shore	chr12:54354529-54355491	NA	NA		rs60674771	rs74348153
cg13019143	-0.348585	0.368129	-13.0825	7.56866e-19	5.11537e-16	32.631	0.542421	0.193836	-0.348585	7	96633060	R	II	DLX6AS	Body	shore	Body-shore	chr7:96634622-96634915	NA	NA
cg23903597	-0.246888	0.712945	-13.0825	7.56992e-19	5.11537e-16	32.6308	0.836388	0.589501	-0.246888	17	61704154	F	II	MAP3K3	Body	shelf	Body-shelf	chr17:61699007-61700728	NA	NA
cg06968859	0.413303	0.569549	13.0785	7.66884e-19	5.17348e-16	32.618	0.362898	0.776201	0.413303	2	80724209	F	II	CTNNA2	Body	opensea	Body-opensea		NA	TRUE
cg09462924	-0.322472	0.314021	-13.0693	7.90462e-19	5.32358e-16	32.588	0.475257	0.152786	-0.322472	2	66666470	R	I	MEIS1	Body	opensea	Body-opensea		NA	NA
cg22879834	-0.205648	0.742412	-13.0637	8.05424e-19	5.40618e-16	32.5695	0.845236	0.639589	-0.205648	2	239169591	F	I	PER2	Body	opensea	Body-opensea		NA	NA
cg07871456	0.275543	0.474042	13.0609	8.12796e-19	5.44654e-16	32.5605	0.33627	0.611813	0.275543	17	48796501	R	II	LUC7L3	TSS1500	shore	TSS1500-shore	chr17:48796750-48797317	NA	NA			rs34821474
cg07076109	-0.134719	0.891166	-13.0582	8.20203e-19	5.48699e-16	32.5515	0.958526	0.823807	-0.134719	7	4747261	R	II	FOXK1	Body	opensea	Body-opensea		NA	TRUE
cg02994246	-0.205456	0.718899	-13.0568	8.23909e-19	5.49658e-16	32.547	0.821627	0.616171	-0.205456	1	21587174	R	I	ECE1	Body	opensea	Body-opensea		NA	NA
cg10659805	-0.390032	0.3354	-13.0517	8.37894e-19	5.57741e-16	32.5304	0.530416	0.140384	-0.390032	7	96631680	F	I	DLX6AS	Body	island	Body-island	chr7:96631383-96631800	NA	NA		rs74570108
cg21473142	-0.3107	0.409314	-13.0494	8.44269e-19	5.61052e-16	32.5229	0.564664	0.253963	-0.3107	3	27762095	F	I	EOMES	Body	shore	Body-shore	chr3:27762351-27763995	NA	TRUE		rs56322946
cg27313642	-0.353379	0.276751	-13.0485	8.46911e-19	5.61876e-16	32.5198	0.453441	0.100062	-0.353379	8	65291542	F	II	MIR124-2	TSS200	shore	TSS200-shore	chr8:65290108-65290946	NA	NA
cg19628333	-0.330812	0.67368	-13.0454	8.55351e-19	5.66144e-16	32.51	0.839086	0.508274	-0.330812	12	56914766	R	II	RBMS2	TSS1500	opensea	TSS1500-opensea		NA	NA
cg11724984	-0.149928	0.835583	-13.0382	8.76119e-19	5.7616e-16	32.4863	0.910547	0.760619	-0.149928	12	121890864	R	I	KDM2B	Body	island	Body-island	chr12:121890758-121891144	NA	NA
cg20614671	-0.19711	0.670897	-13.0381	8.76368e-19	5.7616e-16	32.486	0.769452	0.572342	-0.19711	7	2321431	R	II	SNX8	Body	shelf	Body-shelf	chr7:2318238-2319079	NA	TRUE
cg01000615	-0.377345	0.413198	-13.0379	8.77067e-19	5.7616e-16	32.4852	0.60187	0.224526	-0.377345	1	145562817	R	II	ANKRD35	Body	opensea	Body-opensea		NA	TRUE
cg16167060	0.335174	0.765726	13.0337	8.89072e-19	5.81188e-16	32.4718	0.598139	0.933313	0.335174	2	235934945	R	II	SH3BP4	5'UTR	opensea	5'UTR-opensea		TRUE	TRUE		rs61260198
cg05049448	-0.221423	0.686116	-13.0178	9.37036e-19	6.11544e-16	32.4198	0.796827	0.575405	-0.221423	7	2321355	F	II	SNX8	Body	shelf	Body-shelf	chr7:2318238-2319079	NA	TRUE
cg07719617	-0.200513	0.778569	-13.015	9.45856e-19	6.15415e-16	32.4106	0.878826	0.678313	-0.200513	2	239169696	F	II	PER2	Body	opensea	Body-opensea		NA	NA		rs57898691
cg19466563	-0.284595	0.654133	-13.015	9.46039e-19	6.15415e-16	32.4104	0.79643	0.511835	-0.284595	4	88450506	F	II	SPARCL1	1stExon	opensea	1stExon-opensea		NA	NA		rs56290983
cg21299542	-0.350501	0.335176	-13.011	9.58621e-19	6.21582e-16	32.3973	0.510427	0.159926	-0.350501	4	111550407	F	II	PITX2	Body	shore	Body-shore	chr4:111549879-111550203	NA	NA
cg14791193	-0.128811	0.867782	-12.9953	1.00969e-18	6.50048e-16	32.346	0.932187	0.803376	-0.128811	1	16702476	R	II	C1orf144	Body	opensea	Body-opensea		NA	TRUE
cg21472506	-0.432032	0.301327	-12.9951	1.01027e-18	6.50048e-16	32.3454	0.517343	0.0853112	-0.432032	2	63283967	F	I	OTX1	3'UTR	island	3'UTR-island	chr2:63283936-63284147	NA	TRUE
cg01421021	-0.168779	0.82696	-12.995	1.01063e-18	6.50048e-16	32.3451	0.91135	0.74257	-0.168779	1	10719929	R	I	CASZ1	Body	island	Body-island	chr1:10719867-10720581	NA	NA
cg12597389	-0.306281	0.330682	-12.9936	1.01526e-18	6.5198e-16	32.3406	0.483823	0.177541	-0.306281	7	8482235	R	I	NXPH1	Body	island	Body-island	chr7:8481974-8482762	NA	NA
cg26034341	-0.223013	0.799935	-12.9901	1.02702e-18	6.56474e-16	32.3292	0.911441	0.688428	-0.223013	17	477314	F	II	VPS53	Body	opensea	Body-opensea		NA	TRUE
cg26232945	-0.168953	0.822109	-12.9901	1.02718e-18	6.56474e-16	32.329	0.906585	0.737632	-0.168953	2	208798601	F	II	PLEKHM3	Body	shelf	Body-shelf	chr2:208795525-208795860	NA	TRUE
cg13424940	-0.170752	0.655511	-12.9874	1.03625e-18	6.60179e-16	32.3203	0.740887	0.570135	-0.170752	9	136844397	R	I	VAV2	Body	shore	Body-shore	chr9:136844420-136844775	TRUE	TRUE
cg20133191	-0.156673	0.821438	-12.9874	1.03627e-18	6.60179e-16	32.3203	0.899774	0.743101	-0.156673	7	2638016	F	I	IQCE	Body	opensea	Body-opensea		NA	NA
cg05730368	-0.322168	0.454108	-12.9859	1.04151e-18	6.61415e-16	32.3153	0.615191	0.293024	-0.322168	6	42146052	F	II	GUCA1A	Body	island	Body-island	chr6:42145847-42146053	NA	NA		rs34415451
cg26593946	0.337708	0.419576	12.9746	1.08126e-18	6.83556e-16	32.2783	0.250722	0.58843	0.337708	15	96869043	R	II	NR2F2	TSS200	shelf	TSS200-shelf	chr15:96864881-96866787	NA	TRUE
cg11671688	-0.320026	0.441609	-12.9745	1.08149e-18	6.83556e-16	32.2781	0.601622	0.281596	-0.320026	6	110301075	F	I	GPR6	1stExon	island	1stExon-island	chr6:110299365-110301267	NA	NA
cg25622366	-0.410618	0.276686	-12.9732	1.08637e-18	6.85556e-16	32.2736	0.481995	0.0713766	-0.410618	2	63281139	F	I	OTX1	Body	island	Body-island	chr2:63281034-63281347	NA	NA
cg11770527	-0.151619	0.845592	-12.9683	1.10381e-18	6.93286e-16	32.2579	0.921402	0.769782	-0.151619	13	113410349	F	II	ATP11A	Body	island	Body-island	chr13:113410004-113410362	NA	NA
cg11328436	-0.383445	0.439065	-12.9628	1.12423e-18	7.05011e-16	32.2397	0.630788	0.247343	-0.383445	12	54360511	F	II	HOTAIR	Body	island	Body-island	chr12:54360374-54360660	NA	NA
cg18563999	0.184222	0.191092	12.9622	1.12638e-18	7.05253e-16	32.2379	0.0989809	0.283203	0.184222	12	54785003	R	I	ZNF385A	Body	island	Body-island	chr12:54784900-54785238	TRUE	NA
cg20653075	-0.370983	0.340865	-12.9583	1.14119e-18	7.13409e-16	32.2249	0.526356	0.155373	-0.370983	8	65291682	F	II	MIR124-2	TSS200	shore	TSS200-shore	chr8:65290108-65290946	NA	NA
cg03874199	-0.388957	0.317678	-12.9558	1.1506e-18	7.18174e-16	32.2168	0.512157	0.1232	-0.388957	2	176964456	R	II	HOXD12	TSS200	island	TSS200-island	chr2:176964062-176965509	NA	NA
cg01581084	-0.428157	0.498297	-12.9548	1.15452e-18	7.19499e-16	32.2135	0.712376	0.284219	-0.428157	8	99961874	F	II	OSR2	Body	shore	Body-shore	chr8:99960497-99961438	NA	TRUE
cg14987309	-0.162678	0.809215	-12.9542	1.15678e-18	7.1979e-16	32.2115	0.890554	0.727876	-0.162678	2	236843038	R	II	AGAP1	Body	opensea	Body-opensea		NA	TRUE
cg17138769	-0.372803	0.29433	-12.9513	1.16802e-18	7.25657e-16	32.202	0.480731	0.107928	-0.372803	10	118892211	F	I	VAX1	Body	island	Body-island	chr10:118892161-118892639	NA	NA
cg26595643	-0.285696	0.271396	-12.9393	1.21546e-18	7.52858e-16	32.1626	0.414243	0.128548	-0.285696	10	118899291	R	I	VAX1	TSS1500	island	TSS1500-island	chr10:118899247-118900329	NA	NA
cg24811864	-0.372369	0.334823	-12.9357	1.22979e-18	7.60496e-16	32.151	0.521008	0.148638	-0.372369	18	55019711	R	II	ST8SIA3	TSS200	island	TSS200-island	chr18:55019707-55021605	NA	NA
cg09820244	-0.223173	0.740822	-12.9344	1.23533e-18	7.62744e-16	32.1466	0.852408	0.629235	-0.223173	1	54790722	F	II	SSBP3	Body	opensea	Body-opensea		NA	TRUE
cg00739667	-0.202288	0.629655	-12.9294	1.25605e-18	7.73156e-16	32.1301	0.730798	0.528511	-0.202288	16	81731648	F	I	CMIP	Body	opensea	Body-opensea		NA	NA
cg15067015	0.311373	0.546825	12.9215	1.28922e-18	7.88723e-16	32.1043	0.391138	0.702512	0.311373	1	175671657	F	II	TNR	5'UTR	opensea	5'UTR-opensea		NA	TRUE		rs35241534
cg15811515	-0.468704	0.35194	-12.919	1.29995e-18	7.94075e-16	32.0961	0.586293	0.117588	-0.468704	16	31580989	F	I	CSDAP1	TSS200	island	TSS200-island	chr16:31580559-31581023	NA	NA
cg17514558	-0.365899	0.438497	-12.9085	1.34593e-18	8.18421e-16	32.0618	0.621447	0.255548	-0.365899	5	140621375	R	I	PCDHB19P	Body	island	Body-island	chr5:140620864-140621698	NA	NA
cg02452586	-0.17749	0.790451	-12.8992	1.38815e-18	8.40266e-16	32.0312	0.879196	0.701706	-0.17749	1	233497903	F	II	KIAA1804	Body	island	Body-island	chr1:233497707-233497917	NA	NA		rs45529431
cg17870553	-0.138718	0.84815	-12.8981	1.39357e-18	8.42279e-16	32.0274	0.917509	0.778792	-0.138718	6	144292355	R	II	PLAGL1	5'UTR	opensea	5'UTR-opensea		NA	TRUE
cg12494529	0.371858	0.715047	12.8914	1.42494e-18	8.59668e-16	32.0053	0.529118	0.900976	0.371858	10	1082432	F	II	C10orf110	Body	opensea	Body-opensea		NA	TRUE		rs11250232
cg05787556	-0.330397	0.394581	-12.891	1.42663e-18	8.59668e-16	32.0042	0.559779	0.229382	-0.330397	5	170735186	R	II	TLX3	TSS1500	island	TSS1500-island	chr5:170735169-170739863	NA	TRUE
cg21363377	-0.255168	0.653328	-12.8862	1.44954e-18	8.72159e-16	31.9884	0.780912	0.525744	-0.255168	7	127651533	R	II	SND1	Body	opensea	Body-opensea		NA	TRUE
cg06801994	-0.161655	0.853433	-12.8847	1.45698e-18	8.7532e-16	31.9834	0.93426	0.772605	-0.161655	13	113834082	R	I	PCID2	Body	opensea	Body-opensea		NA	TRUE
cg19272238	-0.155617	0.852309	-12.8818	1.47121e-18	8.82549e-16	31.9737	0.930117	0.7745	-0.155617	17	76220898	F	II	BIRC5	3'UTR	opensea	3'UTR-opensea		NA	NA
cg02596427	-0.146099	0.862148	-12.8801	1.47945e-18	8.84891e-16	31.9682	0.935198	0.789099	-0.146099	2	47295058	R	II	TTC7A	Body	opensea	Body-opensea		NA	TRUE
cg04527018	-0.237419	0.674439	-12.8801	1.47953e-18	8.84891e-16	31.9682	0.793148	0.555729	-0.237419	3	126261298	F	I	CHST13	Body	island	Body-island	chr3:126260488-126261356	NA	NA		rs1056522
cg00446235	0.196039	0.200566	12.87	1.52996e-18	9.12325e-16	31.935	0.102547	0.298586	0.196039	1	161008644	F	II	TSTD1	Body	island	Body-island	chr1:161008377-161008830	NA	NA
cg07044458	0.438544	0.701853	12.8623	1.56973e-18	9.33262e-16	31.9096	0.482581	0.921125	0.438544	7	4751984	F	II	FOXK1	Body	opensea	Body-opensea		TRUE	NA		rs62453198
cg16006349	-0.402224	0.448067	-12.8592	1.58604e-18	9.41565e-16	31.8994	0.649179	0.246955	-0.402224	12	54360460	R	II	HOTAIR	Body	island	Body-island	chr12:54360374-54360660	NA	NA
cg20476058	-0.132297	0.821246	-12.8571	1.59691e-18	9.46033e-16	31.8927	0.887394	0.755097	-0.132297	2	128438738	F	II	LIMS2	5'UTR	opensea	5'UTR-opensea		NA	NA		rs35315151
cg24750513	-0.148932	0.783165	-12.8555	1.60553e-18	9.48204e-16	31.8873	0.857631	0.708699	-0.148932	2	127819455	R	I	BIN1	Body	shore	Body-shore	chr2:127817994-127818231	TRUE	NA
cg04723343	-0.174675	0.670004	-12.8545	1.6109e-18	9.49291e-16	31.884	0.757341	0.582666	-0.174675	2	238647913	F	I	LRRFIP1	Body	shelf	Body-shelf	chr2:238643905-238644109	NA	NA
cg16026549	-0.192821	0.809693	-12.8481	1.64537e-18	9.68178e-16	31.8631	0.906103	0.713282	-0.192821	6	32800519	F	I	TAP2	Body	opensea	Body-opensea		NA	NA
cg06029935	0.235572	0.252517	12.8409	1.68531e-18	9.88777e-16	31.8394	0.134731	0.370303	0.235572	8	145049044	F	II	PLEC1	Body	island	Body-island	chr8:145047293-145052305	TRUE	TRUE
cg27143703	0.331095	0.730668	12.8396	1.69271e-18	9.91671e-16	31.835	0.56512	0.896215	0.331095	17	77961719	F	I	TBC1D16	Body	opensea	Body-opensea		NA	TRUE
cg27496296	-0.240386	0.56886	-12.8324	1.73401e-18	1.01368e-15	31.8112	0.689053	0.448667	-0.240386	17	79376536	R	II	BAHCC1	Body	shore	Body-shore	chr17:79377529-79377870	NA	TRUE
cg09663494	-0.16195	0.824571	-12.8187	1.81478e-18	1.04986e-15	31.7662	0.905546	0.743596	-0.16195	16	67223733	F	II	EXOC3L	5'UTR	opensea	5'UTR-opensea		NA	NA		rs8051891
cg12250807	-0.288046	0.66672	-12.8179	1.81943e-18	1.05055e-15	31.7636	0.810743	0.522697	-0.288046	2	136598602	R	II	MCM6	Body	opensea	Body-opensea		NA	TRUE
cg09146872	-0.15012	0.846011	-12.8143	1.84129e-18	1.05917e-15	31.7518	0.921072	0.770951	-0.15012	17	820881	F	II	NXN	Body	opensea	Body-opensea		NA	NA		rs11871962
cg01345315	-0.336993	0.328335	-12.8142	1.8423e-18	1.05917e-15	31.7513	0.496831	0.159838	-0.336993	12	43945998	F	II	ADAMTS20	TSS1500	island	TSS1500-island	chr12:43944719-43946285	NA	NA		rs275604
cg08118034	0.247318	0.728321	12.8043	1.90392e-18	1.08991e-15	31.7187	0.604661	0.85198	0.247318	22	29706595	F	I	GAS2L1	Body	island	Body-island	chr22:29706500-29706710	NA	NA
cg07039560	-0.232106	0.599667	-12.8003	1.92971e-18	1.1031e-15	31.7054	0.71572	0.483614	-0.232106	5	140683681	F	I	SLC25A2	TSS200	island	TSS200-island	chr5:140683195-140683773	NA	NA
cg07160746	-0.307264	0.382196	-12.7987	1.93948e-18	1.10709e-15	31.7004	0.535828	0.228564	-0.307264	20	43726765	R	I	KCNS1	Body	island	Body-island	chr20:43726297-43727372	TRUE	NA
cg07691684	0.302601	0.737468	12.7983	1.94223e-18	1.10709e-15	31.699	0.586168	0.888769	0.302601	4	16773677	F	II	LDB2	Body	opensea	Body-opensea		NA	TRUE
cg15239304	-0.10629	0.891614	-12.7962	1.95622e-18	1.11191e-15	31.6919	0.944758	0.838469	-0.10629	2	224810907	R	II	WDFY1	TSS1500	shore	TSS1500-shore	chr2:224808923-224810219	NA	NA
cg03983270	-0.208257	0.70257	-12.792	1.98389e-18	1.12445e-15	31.678	0.806698	0.598441	-0.208257	16	81731249	R	I	CMIP	Body	opensea	Body-opensea		TRUE	NA
cg23130254	-0.370231	0.28167	-12.7882	2.00864e-18	1.13526e-15	31.6658	0.466785	0.0965541	-0.370231	2	176964588	R	II	HOXD12	1stExon	island	1stExon-island	chr2:176964062-176965509	NA	NA
cg12606911	-0.358587	0.431598	-12.7835	2.04093e-18	1.15189e-15	31.65	0.610892	0.252305	-0.358587	2	87036626	R	I	CD8A	TSS1500	island	TSS1500-island	chr2:87036600-87037001	NA	NA
cg26790247	-0.397887	0.438295	-12.7825	2.04764e-18	1.15405e-15	31.6468	0.637239	0.239352	-0.397887	3	147108512	R	II	ZIC4	Body	island	Body-island	chr3:147108511-147111703	NA	NA
cg18082788	0.291239	0.2955	12.7801	2.06367e-18	1.16145e-15	31.639	0.149881	0.44112	0.291239	6	149806339	R	I	ZC3H12D	TSS200	opensea	TSS200-opensea		NA	NA
cg13023623	-0.369068	0.439953	-12.7756	2.09529e-18	1.17759e-15	31.624	0.624487	0.255419	-0.369068	14	57276257	R	I	OTX2	5'UTR	island	5'UTR-island	chr14:57274607-57276840	NA	NA
cg22779765	-0.118096	0.856967	-12.7683	2.14683e-18	1.20318e-15	31.6	0.916015	0.797919	-0.118096	14	103369786	R	I	TRAF3	Body	opensea	Body-opensea		NA	NA
cg03099208	-0.37884	0.332065	-12.7674	2.15351e-18	1.20524e-15	31.5969	0.521485	0.142645	-0.37884	7	8474544	R	II	NXPH1	5'UTR	island	5'UTR-island	chr7:8473139-8475199	NA	NA
cg05017639	0.269194	0.535028	12.763	2.18542e-18	1.218e-15	31.5823	0.400431	0.669625	0.269194	16	13330599	R	II	SHISA9	3'UTR	opensea	3'UTR-opensea		NA	NA
cg11174855	-0.378304	0.326863	-12.7598	2.20886e-18	1.2256e-15	31.5718	0.516015	0.137711	-0.378304	10	134598352	R	I	NKX6-2	3'UTR	island	3'UTR-island	chr10:134597357-134602649	NA	NA
cg00891541	-0.300345	0.589003	-12.7593	2.21266e-18	1.2256e-15	31.5701	0.739176	0.438831	-0.300345	16	68481487	F	I	SMPD3	5'UTR	island	5'UTR-island	chr16:68480864-68482822	NA	TRUE
cg03339247	-0.173301	0.814636	-12.759	2.21435e-18	1.2256e-15	31.5693	0.901286	0.727985	-0.173301	16	73059888	F	II	ZFHX3	5'UTR	opensea	5'UTR-opensea		NA	TRUE
cg17276002	0.197758	0.184657	12.7454	2.31713e-18	1.27815e-15	31.5244	0.0857777	0.283536	0.197758	10	75172806	R	I	ANXA7	5'UTR	shore	5'UTR-shore	chr10:75173411-75173950	NA	NA
cg09041678	-0.340783	0.394841	-12.7444	2.32541e-18	1.27999e-15	31.5209	0.565233	0.22445	-0.340783	11	31839947	F	II	PAX6	TSS1500	shore	TSS1500-shore	chr11:31841315-31842003	NA	NA
cg25783892	0.341767	0.753096	12.7432	2.33493e-18	1.28347e-15	31.5169	0.582213	0.92398	0.341767	10	85898649	F	II	GHITM	TSS1500	shore	TSS1500-shore	chr10:85899058-85899640	NA	NA
cg14118850	-0.378324	0.569561	-12.7389	2.36846e-18	1.30012e-15	31.5028	0.758723	0.380399	-0.378324	2	10447890	F	II	HPCAL1	5'UTR	shelf	5'UTR-shelf	chr2:10442308-10444509	NA	NA
cg22809871	-0.306128	0.263378	-12.7383	2.37324e-18	1.30096e-15	31.5008	0.416442	0.110314	-0.306128	13	102572229	F	I	FGF14	Body	shelf	Body-shelf	chr13:102568425-102569495	NA	NA		rs9585812
cg00087368	-0.36468	0.42334	-12.7349	2.40018e-18	1.31393e-15	31.4896	0.60568	0.241	-0.36468	6	100896392	R	II	SIM1	Body	shore	Body-shore	chr6:100897080-100897621	NA	TRUE
cg23095743	-0.342229	0.300072	-12.7323	2.42115e-18	1.3236e-15	31.481	0.471187	0.128958	-0.342229	10	104000831	F	I	PITX3	5'UTR	island	5'UTR-island	chr10:104000254-104001741	NA	NA
cg10556064	-0.267285	0.576982	-12.7256	2.47588e-18	1.34984e-15	31.4589	0.710625	0.44334	-0.267285	16	68481489	F	I	SMPD3	5'UTR	island	5'UTR-island	chr16:68480864-68482822	NA	TRUE
cg01257383	0.238493	0.513887	12.7171	2.54703e-18	1.38486e-15	31.4309	0.39464	0.633133	0.238493	11	46408399	F	II	CHRM4	TSS1500	shore	TSS1500-shore	chr11:46406904-46407441	TRUE	NA		rs78125679
cg12670347	-0.310919	0.374604	-12.7157	2.55922e-18	1.38961e-15	31.4261	0.530063	0.219144	-0.310919	12	114847578	R	I	TBX5	TSS1500	island	TSS1500-island	chr12:114845861-114847650	NA	NA
cg17408527	-0.326449	0.464089	-12.7153	2.56296e-18	1.38975e-15	31.4247	0.627313	0.300864	-0.326449	19	58629967	R	II	ZSCAN18	TSS200	island	TSS200-island	chr19:58629309-58630241	NA	NA
cg04540406	0.241082	0.327718	12.7136	2.57776e-18	1.39589e-15	31.419	0.207177	0.448259	0.241082	16	46655675	R	II	SHCBP1	TSS1500	shore	TSS1500-shore	chr16:46655002-46655374	NA	NA
cg20114732	-0.394831	0.259359	-12.7104	2.6051e-18	1.40879e-15	31.4086	0.456774	0.0619436	-0.394831	6	166579135	F	I	T	Body	shore	Body-shore	chr6:166579973-166583423	NA	NA		rs34956905
cg12485428	-0.286801	0.561474	-12.708	2.62596e-18	1.41815e-15	31.4007	0.704874	0.418074	-0.286801	17	1549098	R	II	SCARF1	TSS200	shore	TSS200-shore	chr17:1546742-1547324	NA	NA
cg01525538	-0.324208	0.570857	-12.7052	2.65066e-18	1.42957e-15	31.3914	0.732961	0.408753	-0.324208	1	228785987	R	II	DUSP5P	Body	island	Body-island	chr1:228785986-228786204	NA	NA
cg03364683	0.134466	0.107882	12.7034	2.66709e-18	1.4365e-15	31.3853	0.0406491	0.175115	0.134466	4	169402298	F	II	DDX60L	TSS1500	shore	TSS1500-shore	chr4:169401350-169401725	TRUE	NA
cg16881676	0.200355	0.189118	12.7018	2.68136e-18	1.44224e-15	31.38	0.08894	0.289295	0.200355	12	49659619	R	II	TUBA1C	Body	shore	Body-shore	chr12:49658246-49659175	NA	NA
cg18297437	-0.293235	0.305174	-12.6909	2.78121e-18	1.49061e-15	31.3439	0.451792	0.158557	-0.293235	3	147131332	R	I	ZIC1	Body	island	Body-island	chr3:147131066-147131333	NA	NA
cg22954906	-0.140591	0.840729	-12.6907	2.78244e-18	1.49061e-15	31.3434	0.911025	0.770434	-0.140591	13	103531058	R	II	LOC121952	TSS1500	opensea	TSS1500-opensea		NA	TRUE
cg27364741	-0.361184	0.336808	-12.6885	2.80365e-18	1.49797e-15	31.3359	0.5174	0.156216	-0.361184	2	63281069	R	I	OTX1	Body	island	Body-island	chr2:63281034-63281347	NA	NA
cg05685297	-0.141195	0.805458	-12.6814	2.87109e-18	1.52992e-15	31.3124	0.876056	0.734861	-0.141195	8	96070313	F	II	C8orf38	3'UTR	opensea	3'UTR-opensea		NA	NA
cg07961632	0.236289	0.264998	12.6798	2.88653e-18	1.53611e-15	31.3071	0.146853	0.383142	0.236289	1	27668421	R	II	SYTL1	TSS200	opensea	TSS200-opensea		TRUE	TRUE
cg17945976	-0.39014	0.35766	-12.6757	2.92593e-18	1.55295e-15	31.2937	0.55273	0.16259	-0.39014	2	66667433	R	II	MEIS1	Body	opensea	Body-opensea		NA	NA
cg26287741	-0.272908	0.577144	-12.6709	2.97351e-18	1.57562e-15	31.2777	0.713598	0.44069	-0.272908	6	138867125	R	II	NHSL1	Body	opensea	Body-opensea		NA	TRUE	low-CpG:138908496-138908826
cg18674980	-0.427095	0.335372	-12.6706	2.97651e-18	1.57562e-15	31.2767	0.548919	0.121824	-0.427095	8	86350581	F	II	CA3	TSS1500	shore	TSS1500-shore	chr8:86350765-86351196	NA	TRUE
cg02215357	0.284444	0.296676	12.6696	2.98606e-18	1.57859e-15	31.2735	0.154454	0.438898	0.284444	13	53191046	R	II	HNRNPA1L2	TSS1500	shore	TSS1500-shore	chr13:53191405-53191872	NA	NA
cg15962969	-0.283174	0.737271	-12.6669	3.01403e-18	1.59072e-15	31.2643	0.878857	0.595684	-0.283174	6	138866887	F	II	NHSL1	Body	opensea	Body-opensea		NA	TRUE	low-CpG:138908496-138908826
cg00505045	-0.339776	0.365185	-12.6666	3.01695e-18	1.59072e-15	31.2634	0.535073	0.195297	-0.339776	4	147561669	R	II	POU4F2	Body	island	Body-island	chr4:147559205-147561901	NA	TRUE
cg07973435	-0.348238	0.35948	-12.6647	3.03605e-18	1.59755e-15	31.2571	0.533598	0.185361	-0.348238	6	100905458	R	I	SIM1	Body	island	Body-island	chr6:100905444-100905697	NA	NA
cg24406391	-0.196581	0.653325	-12.6645	3.03787e-18	1.59755e-15	31.2565	0.751615	0.555034	-0.196581	1	155938911	F	II	ARHGEF2	Body	opensea	Body-opensea		NA	TRUE
cg04016383	-0.149949	0.812603	-12.6603	3.08061e-18	1.6179e-15	31.2427	0.887578	0.737628	-0.149949	2	198513476	F	II	RFTN2	Body	opensea	Body-opensea		NA	TRUE		rs76351389
cg05942459	-0.351115	0.310457	-12.6579	3.10559e-18	1.62675e-15	31.2347	0.486014	0.134899	-0.351115	6	101846805	R	I	GRIK2	TSS200	island	TSS200-island	chr6:101846766-101847135	NA	NA
cg23889730	-0.309964	0.483055	-12.6568	3.11687e-18	1.63054e-15	31.2311	0.638037	0.328072	-0.309964	14	94254131	R	II	PRIMA1	5'UTR	island	5'UTR-island	chr14:94253952-94255733	TRUE	NA
cg24069602	0.237999	0.566952	12.6546	3.14017e-18	1.64058e-15	31.2238	0.447953	0.685952	0.237999	17	62045522	R	I	SCN4A	Body	opensea	Body-opensea		NA	NA
cg16509777	-0.362513	0.441759	-12.6532	3.15551e-18	1.64217e-15	31.2189	0.623016	0.260503	-0.362513	2	45172265	R	II	SIX3	3'UTR	shore	3'UTR-shore	chr2:45169505-45171884	NA	NA			rs10204281
cg09347582	-0.143313	0.868571	-12.6525	3.16288e-18	1.64387e-15	31.2166	0.940227	0.796914	-0.143313	1	233497916	F	II	KIAA1804	Body	island	Body-island	chr1:233497707-233497917	NA	NA			rs45529431
cg03081173	0.355511	0.569991	12.6502	3.18758e-18	1.65322e-15	31.2089	0.392236	0.747747	0.355511	6	31166502	F	I	HCG27	Body	shore	Body-shore	chr6:31165412-31165923	NA	NA		rs9404982
cg17937101	0.20024	0.203399	12.65	3.18911e-18	1.65322e-15	31.2085	0.103279	0.303519	0.20024	8	1765066	F	I	MIR596	TSS1500	island	TSS1500-island	chr8:1764328-1765171	TRUE	TRUE
cg11636504	-0.300235	0.536701	-12.6423	3.27231e-18	1.69197e-15	31.183	0.686818	0.386583	-0.300235	2	99439883	F	II	C2orf55	Body	island	Body-island	chr2:99438297-99439884	NA	NA
cg08844325	-0.182069	0.78604	-12.6352	3.35174e-18	1.73081e-15	31.1592	0.877074	0.695005	-0.182069	2	9459368	F	I	ASAP2	Body	island	Body-island	chr2:9459243-9459454	NA	TRUE		rs4627537
cg24613080	-0.364967	0.313435	-12.6339	3.36595e-18	1.73591e-15	31.1551	0.495919	0.130951	-0.364967	17	32484035	R	I	ACCN1	TSS1500	island	TSS1500-island	chr17:32484007-32484280	NA	TRUE
cg14314744	-0.318313	0.329241	-12.6258	3.4594e-18	1.77496e-15	31.128	0.488397	0.170084	-0.318313	6	100897445	R	I	SIM1	Body	island	Body-island	chr6:100897080-100897621	NA	NA
cg11160908	0.252085	0.350652	12.6235	3.48529e-18	1.78596e-15	31.1206	0.224609	0.476694	0.252085	3	122712271	R	II	SEMA5B	5'UTR	opensea	5'UTR-opensea		NA	TRUE			rs78000931
cg04461228	-0.307826	0.387762	-12.6184	3.54619e-18	1.80792e-15	31.1035	0.541674	0.233849	-0.307826	5	92906678	R	II	FLJ42709	Body	island	Body-island	chr5:92906239-92908875	NA	NA
cg23172086	0.344412	0.657635	12.6162	3.57257e-18	1.8188e-15	31.0961	0.485428	0.829841	0.344412	10	98129751	R	I	TLL2	Body	opensea	Body-opensea		NA	NA
cg08243465	0.389263	0.591991	12.6158	3.57662e-18	1.8188e-15	31.095	0.39736	0.786623	0.389263	20	56274036	F	II	PMEPA1	5'UTR	opensea	5'UTR-opensea		TRUE	NA
cg19797376	-0.371247	0.449931	-12.6148	3.58928e-18	1.8192e-15	31.0915	0.635554	0.264307	-0.371247	1	47695475	F	II	TAL1	TSS200	shore	TSS200-shore	chr1:47696504-47698197	NA	NA
cg00983904	-0.363021	0.355684	-12.6147	3.59018e-18	1.8192e-15	31.0913	0.537195	0.174174	-0.363021	12	6665288	R	I	IFFO1	TSS200	island	TSS200-island	chr12:6664425-6665336	NA	NA	high-CpG:6535366-6535558
cg03597347	-0.259638	0.356788	-12.6146	3.59101e-18	1.8192e-15	31.091	0.486608	0.226969	-0.259638	6	28058909	R	I	ZSCAN12L1	TSS200	opensea	TSS200-opensea		NA	NA
cg00720839	-0.172544	0.820508	-12.6112	3.63336e-18	1.83536e-15	31.0794	0.90678	0.734236	-0.172544	6	32800486	F	I	TAP2	Body	opensea	Body-opensea		NA	NA
cg14615927	-0.193817	0.710154	-12.6106	3.6405e-18	1.83536e-15	31.0775	0.807063	0.613246	-0.193817	2	240259213	R	I	HDAC4	Body	opensea	Body-opensea		NA	TRUE
cg03622664	-0.199635	0.770476	-12.6105	3.64123e-18	1.83536e-15	31.0773	0.870293	0.670658	-0.199635	13	21371628	R	II	XPO4	Body	opensea	Body-opensea		NA	TRUE
cg05108467	0.32235	0.310895	12.6079	3.67298e-18	1.84904e-15	31.0687	0.14972	0.472069	0.32235	15	96869132	R	II	NR2F2	TSS200	shelf	TSS200-shelf	chr15:96864881-96866787	NA	TRUE
cg12374506	-0.247024	0.473038	-12.6063	3.69342e-18	1.85699e-15	31.0632	0.596551	0.349526	-0.247024	12	49728243	R	I	C1QL4	Body	shore	Body-shore	chr12:49729728-49731162	NA	NA
cg07860213	-0.443872	0.331053	-12.6003	3.76765e-18	1.88721e-15	31.0435	0.552989	0.109117	-0.443872	8	70982039	R	I	PRDM14	Body	island	Body-island	chr8:70981873-70984888	TRUE	NA
cg15377283	-0.415512	0.438871	-12.598	3.79809e-18	1.89772e-15	31.0356	0.646627	0.231116	-0.415512	8	55371369	R	II	SOX17	Body	island	Body-island	chr8:55370170-55372525	NA	TRUE
cg23565821	0.230204	0.237679	12.5942	3.84656e-18	1.91715e-15	31.023	0.122577	0.352781	0.230204	6	33385056	R	II	CUTA	Body	shore	Body-shore	chr6:33385678-33386262	TRUE	NA
cg27252696	-0.430638	0.313851	-12.5934	3.85607e-18	1.9195e-15	31.0206	0.52917	0.0985321	-0.430638	6	100912940	R	I	SIM1	TSS1500	island	TSS1500-island	chr6:100912071-100913337	TRUE	NA
cg11866303	0.141831	0.193946	12.5916	3.87945e-18	1.92721e-15	31.0146	0.12303	0.264861	0.141831	19	40732691	F	I	CNTD2	TSS200	shore	TSS200-shore	chr19:40730385-40730712	TRUE	NA
cg03184290	-0.37318	0.316326	-12.5915	3.88116e-18	1.92721e-15	31.0141	0.502916	0.129736	-0.37318	4	111550666	R	I	PITX2	Body	shore	Body-shore	chr4:111549879-111550203	NA	NA
cg08343600	0.29762	0.635347	12.5883	3.92395e-18	1.94364e-15	31.0033	0.486537	0.784157	0.29762	10	43894095	F	II	HNRNPF	5'UTR	shore	5'UTR-shore	chr10:43891546-43892917	NA	NA		rs77140243
cg10383447	0.177186	0.172541	12.5862	3.95118e-18	1.95471e-15	30.9965	0.0839477	0.261134	0.177186	16	58535093	F	I	NDRG4	Body	island	Body-island	chr16:58535040-58535596	NA	NA
cg03040848	0.229341	0.656511	12.5834	3.98894e-18	1.97013e-15	30.987	0.54184	0.771182	0.229341	16	88993053	R	I	CBFA2T3	5'UTR	shore	5'UTR-shore	chr16:88994137-88994442	NA	NA
cg00251824	-0.108494	0.888737	-12.5831	3.99219e-18	1.97013e-15	30.9862	0.942984	0.83449	-0.108494	8	641466	R	II	ERICH1	Body	shelf	Body-shelf	chr8:637393-638251	NA	NA
cg23229261	-0.356002	0.288099	-12.5792	4.04589e-18	1.98928e-15	30.973	0.4661	0.110098	-0.356002	2	63284066	F	I	OTX1	3'UTR	island	3'UTR-island	chr2:63283936-63284147	NA	TRUE
cg21143896	-0.229195	0.610232	-12.5765	4.08179e-18	2.00447e-15	30.9643	0.724829	0.495634	-0.229195	7	2802374	F	I	GNA12	Body	shore	Body-shore	chr7:2802440-2802698	NA	TRUE
cg01409343	0.291085	0.312715	12.5713	4.15464e-18	2.02949e-15	30.9468	0.167172	0.458258	0.291085	17	57915740	R	II	TMEM49	Body	opensea	Body-opensea		NA	NA	low-CpG:55269974-55270675
cg08886154	0.294315	0.626222	12.5711	4.15718e-18	2.02949e-15	30.9462	0.479065	0.77338	0.294315	7	127256676	R	II	PAX4	TSS1500	opensea	TSS1500-opensea		NA	NA
cg01602690	-0.253292	0.286424	-12.571	4.15805e-18	2.02949e-15	30.946	0.41307	0.159778	-0.253292	2	176987161	F	I	HOXD9	TSS1500	island	TSS1500-island	chr2:176986424-176988291	TRUE	TRUE			rs73033728
cg23281340	-0.116957	0.866021	-12.5699	4.1733e-18	2.03445e-15	30.9423	0.9245	0.807542	-0.116957	19	6210918	R	II	MLLT1	3'UTR	shore	3'UTR-shore	chr19:6211767-6213128	NA	NA
cg20431250	-0.415613	0.375872	-12.5687	4.1913e-18	2.04075e-15	30.9381	0.583679	0.168066	-0.415613	6	108492653	F	II	NR2E1	Body	shore	Body-shore	chr6:108491033-108491410	NA	NA
cg15958839	-0.139789	0.861988	-12.5613	4.29599e-18	2.07936e-15	30.9137	0.931883	0.792093	-0.139789	2	54843164	F	II	SPTBN1	Body	opensea	Body-opensea		NA	NA		rs3796013
cg00806704	-0.317396	0.418211	-12.5613	4.29655e-18	2.07936e-15	30.9135	0.576909	0.259514	-0.317396	13	28539042	F	I	CDX2	Body	shore	Body-shore	chr13:28540356-28541279	NA	NA
cg20950167	-0.320711	0.586383	-12.5593	4.32508e-18	2.08812e-15	30.907	0.746739	0.426028	-0.320711	17	35300448	F	II	LHX1	3'UTR	island	3'UTR-island	chr17:35291899-35300875	NA	NA		rs71693251
cg19619405	-0.415018	0.293227	-12.5587	4.3333e-18	2.08957e-15	30.9051	0.500736	0.0857177	-0.415018	12	43945892	F	I	ADAMTS20	TSS200	island	TSS200-island	chr12:43944719-43946285	NA	NA		rs275603	rs71455455
cg04308089	0.321401	0.369812	12.5557	4.37806e-18	2.10862e-15	30.8949	0.209112	0.530512	0.321401	15	96869027	R	II	NR2F2	TSS200	shelf	TSS200-shelf	chr15:96864881-96866787	NA	TRUE
cg22674699	-0.472256	0.319607	-12.5525	4.42596e-18	2.12913e-15	30.8842	0.555735	0.0834794	-0.472256	2	176987918	R	I	HOXD9	1stExon	island	1stExon-island	chr2:176986424-176988291	TRUE	TRUE
cg02161292	-0.20525	0.767912	-12.5515	4.44066e-18	2.13364e-15	30.8809	0.870537	0.665287	-0.20525	5	140821687	F	II	PCDHGA4	Body	island	Body-island	chr5:140821228-140821688	NA	NA		rs76108139
cg18910243	-0.102242	0.910477	-12.55	4.46246e-18	2.14155e-15	30.876	0.961598	0.859356	-0.102242	10	45967498	F	II	2019-03-08	Body	opensea	Body-opensea		NA	TRUE	low-CpG:45287485-45287519	rs17451757
cg12368583	-0.427064	0.373088	-12.5487	4.48248e-18	2.14664e-15	30.8716	0.58662	0.159556	-0.427064	10	77605508	F	II	C10orf11	Body	opensea	Body-opensea		NA	TRUE		rs34386752
cg00097146	-0.363703	0.269824	-12.5486	4.48379e-18	2.14664e-15	30.8713	0.451676	0.0879723	-0.363703	2	45171818	F	I	SIX3	Body	island	Body-island	chr2:45169505-45171884	TRUE	NA		rs338074
cg03025825	-0.19113	0.770416	-12.5439	4.55536e-18	2.17816e-15	30.8557	0.865981	0.674851	-0.19113	17	1975245	R	II	SMG6	Body	opensea	Body-opensea		NA	NA
cg01610632	-0.382892	0.435277	-12.5436	4.56049e-18	2.17816e-15	30.8545	0.626723	0.243832	-0.382892	3	147127579	R	II	ZIC1	1stExon	island	1stExon-island	chr3:147126988-147128999	NA	NA
cg11172423	-0.181501	0.789278	-12.5411	4.5985e-18	2.1937e-15	30.8463	0.880028	0.698528	-0.181501	1	43205623	R	II	CLDN19	1stExon	shore	1stExon-shore	chr1:43204115-43204323	NA	NA
cg01081096	0.293098	0.674968	12.5398	4.61921e-18	2.20096e-15	30.8419	0.52842	0.821517	0.293098	7	150721518	F	II	ATG9B	1stExon	shelf	1stExon-shelf	chr7:150725173-150726018	NA	NA
cg11969108	0.302022	0.516963	12.5358	4.68119e-18	2.2252e-15	30.8287	0.365952	0.667974	0.302022	7	154582418	F	II	DPP6	Body	shelf	Body-shelf	chr7:154585682-154586336	NA	NA
cg04467618	-0.359142	0.456912	-12.5352	4.69151e-18	2.22746e-15	30.8265	0.636483	0.277341	-0.359142	6	134210946	F	II	TCF21	1stExon	island	1stExon-island	chr6:134210639-134211218	TRUE	NA		rs78733835
cg16780688	0.201673	0.437668	12.5325	4.73364e-18	2.24481e-15	30.8177	0.336832	0.538505	0.201673	8	120220073	F	I	MAL2	TSS1500	shore	TSS1500-shore	chr8:120220388-120221222	NA	NA
cg11732134	-0.153625	0.838288	-12.5281	4.8036e-18	2.2726e-15	30.8032	0.9151	0.761475	-0.153625	1	10732912	F	I	CASZ1	Body	opensea	Body-opensea		NA	NA
cg21647227	-0.434915	0.369887	-12.5274	4.81641e-18	2.27597e-15	30.8005	0.587345	0.152429	-0.434915	1	119527111	F	II	TBX15	5'UTR	island	5'UTR-island	chr1:119526782-119527192	TRUE	NA
cg07539798	-0.254903	0.629491	-12.5224	4.89762e-18	2.3066e-15	30.784	0.756943	0.50204	-0.254903	5	140811312	F	II	PCDHGA4	Body	island	Body-island	chr5:140810494-140812617	NA	NA
cg07155724	-0.21165	0.644479	-12.5213	4.91542e-18	2.31186e-15	30.7804	0.750304	0.538654	-0.21165	14	105165730	F	II	INF2	5'UTR	shore	5'UTR-shore	chr14:105167277-105167501	NA	NA	low-CpG:104236726-104236792	rs8014967
cg14516287	0.293794	0.534689	12.5191	4.9522e-18	2.3237e-15	30.773	0.387792	0.681586	0.293794	9	119987070	F	II	ASTN2	Body	opensea	Body-opensea		NA	TRUE		rs78787619
cg09595050	-0.253057	0.567469	-12.5184	4.96483e-18	2.3269e-15	30.7705	0.693998	0.440941	-0.253057	4	81110205	F	I	PRDM8	5'UTR	island	5'UTR-island	chr4:81109887-81110460	NA	NA
cg13951797	0.257636	0.444978	12.5171	4.9859e-18	2.33405e-15	30.7663	0.31616	0.573796	0.257636	16	2204381	R	II	TRAF7	TSS1500	shore	TSS1500-shore	chr16:2205207-2205902	NA	NA
cg04223420	-0.34868	0.347548	-12.5117	5.07657e-18	2.37095e-15	30.7485	0.521888	0.173208	-0.34868	5	134363877	R	I	PITX1	3'UTR	island	3'UTR-island	chr5:134363092-134365146	NA	TRUE
cg05945615	0.096005	0.0889482	12.5038	5.21455e-18	2.42973e-15	30.7219	0.0409457	0.136951	0.096005	22	38035456	R	I	SH3BP1	TSS1500	island	TSS1500-island	chr22:38035350-38035928	TRUE	NA	high-CpG:36365393-36365781
cg14486338	-0.427188	0.361421	-12.5019	5.24749e-18	2.44224e-15	30.7157	0.575015	0.147827	-0.427188	8	99440279	R	I	KCNS2	Body	island	Body-island	chr8:99438692-99440425	NA	NA
cg12268637	-0.328963	0.456926	-12.4968	5.33949e-18	2.47499e-15	30.6985	0.621408	0.292445	-0.328963	2	176964502	R	II	HOXD12	TSS200	island	TSS200-island	chr2:176964062-176965509	NA	NA
cg03916783	0.27598	0.645946	12.4967	5.3412e-18	2.47499e-15	30.6982	0.507956	0.783936	0.27598	11	95977018	F	I	MAML2	Body	opensea	Body-opensea		NA	NA
cg20972294	0.36575	0.655088	12.4966	5.34256e-18	2.47499e-15	30.6979	0.472213	0.837963	0.36575	11	133005919	R	II	OPCML	Body	opensea	Body-opensea		NA	TRUE
cg00074145	-0.372468	0.389873	-12.4959	5.35538e-18	2.47806e-15	30.6956	0.576107	0.203639	-0.372468	15	53075505	F	I	ONECUT1	Body	shore	Body-shore	chr15:53076187-53077926	TRUE	NA
cg15007228	-0.182541	0.605557	-12.4937	5.39461e-18	2.49334e-15	30.6883	0.696827	0.514286	-0.182541	1	2210335	F	I	SKI	Body	shore	Body-shore	chr1:2212020-2213881	TRUE	TRUE
cg18483459	-0.268915	0.705216	-12.4928	5.41218e-18	2.49857e-15	30.6851	0.839673	0.570758	-0.268915	2	203294144	R	II	BMPR2	Body	opensea	Body-opensea		NA	TRUE
cg19104015	-0.391896	0.393468	-12.4916	5.43363e-18	2.50559e-15	30.6812	0.589416	0.19752	-0.391896	17	46646043	F	II	HOXB3	5'UTR	shelf	5'UTR-shelf	chr17:46641534-46642110	NA	NA
cg04415798	-0.416403	0.354743	-12.4787	5.67483e-18	2.61381e-15	30.6382	0.562944	0.146542	-0.416403	14	37128586	F	I	PAX9	5'UTR	shore	5'UTR-shore	chr14:37126786-37128274	NA	NA
cg01460202	-0.318003	0.34348	-12.4756	5.73422e-18	2.6351e-15	30.6279	0.502482	0.184479	-0.318003	16	23706506	F	II	ERN2	Body	opensea	Body-opensea		NA	TRUE
cg03398865	-0.299191	0.451215	-12.4735	5.77637e-18	2.64537e-15	30.6207	0.60081	0.301619	-0.299191	5	1879554	F	II	IRX4	Body	shore	Body-shore	chr5:1879689-1879928	NA	NA
cg27404351	0.250949	0.573906	12.473	5.78489e-18	2.64625e-15	30.6192	0.448432	0.699381	0.250949	11	123847741	F	II	OR10S1	1stExon	opensea	1stExon-opensea		NA	NA
cg16671079	0.277816	0.60382	12.4699	5.84642e-18	2.67135e-15	30.6087	0.464911	0.742728	0.277816	17	74868561	F	II	MGAT5B	Body	shore	Body-shore	chr17:74864170-74866657	TRUE	TRUE
cg04242728	-0.186946	0.767201	-12.4643	5.95748e-18	2.71281e-15	30.5901	0.860674	0.673728	-0.186946	16	2536153	R	II	TBC1D24	5'UTR	opensea	5'UTR-opensea		NA	NA
cg02885007	-0.22556	0.293021	-12.4593	6.06041e-18	2.75343e-15	30.5732	0.405801	0.180241	-0.22556	2	176987605	R	I	HOXD9	1stExon	island	1stExon-island	chr2:176986424-176988291	TRUE	TRUE
cg25993718	-0.30691	0.27723	-12.4574	6.09841e-18	2.76755e-15	30.567	0.430685	0.123775	-0.30691	20	54580196	F	II	CBLN4	TSS200	island	TSS200-island	chr20:54578603-54580678	NA	NA
cg11912239	-0.159678	0.783318	-12.4547	6.15411e-18	2.78967e-15	30.558	0.863157	0.703479	-0.159678	17	76220608	F	I	BIRC5	3'UTR	opensea	3'UTR-opensea		NA	NA		rs2856269
cg15667493	-0.228098	0.758287	-12.4514	6.22363e-18	2.81164e-15	30.5469	0.872336	0.644238	-0.228098	5	55404179	F	II	ANKRD55	Body	opensea	Body-opensea		NA	TRUE
cg09806671	-0.238184	0.371966	-12.4507	6.23766e-18	2.81481e-15	30.5446	0.491058	0.252874	-0.238184	1	165324679	F	I	LMX1A	Body	island	Body-island	chr1:165324191-165326328	TRUE	NA			rs35170013
cg04637478	-0.34475	0.396309	-12.4498	6.25695e-18	2.81717e-15	30.5416	0.568684	0.223934	-0.34475	5	140753655	R	II	PCDHGA4	Body	island	Body-island	chr5:140753654-140753952	NA	NA
cg05923226	-0.24992	0.591427	-12.4412	6.44191e-18	2.89719e-15	30.5127	0.716387	0.466467	-0.24992	19	15121516	F	II	CCDC105	TSS200	shore	TSS200-shore	chr19:15121590-15122143	NA	NA
cg00480389	-0.253565	0.248104	-12.4401	6.4658e-18	2.90467e-15	30.5091	0.374886	0.121321	-0.253565	20	54580133	F	I	CBLN4	TSS200	island	TSS200-island	chr20:54578603-54580678	NA	NA
cg09519218	-0.296618	0.550393	-12.4349	6.57957e-18	2.94917e-15	30.4918	0.698702	0.402084	-0.296618	10	126390317	F	II	FAM53B	Body	opensea	Body-opensea		NA	TRUE		rs3842242
cg16336556	0.358179	0.622413	12.4244	6.81783e-18	3.04788e-15	30.4566	0.443323	0.801502	0.358179	2	33295138	R	II	LTBP1	Body	opensea	Body-opensea		TRUE	TRUE
cg00058879	-0.387478	0.32549	-12.4228	6.85456e-18	3.05874e-15	30.4513	0.519228	0.131751	-0.387478	22	40082173	F	II	CACNA1I	Body	island	Body-island	chr22:40081519-40082390	NA	NA
cg16956686	-0.333519	0.501764	-12.4179	6.9693e-18	3.10303e-15	30.4349	0.668523	0.335005	-0.333519	7	4304779	F	I	SDK1	Body	island	Body-island	chr7:4303079-4305062	NA	NA
cg05771342	-0.271114	0.675054	-12.411	7.13328e-18	3.16199e-15	30.4118	0.810611	0.539498	-0.271114	11	68782202	R	II	MRGPRF	TSS1500	shelf	TSS1500-shelf	chr11:68778569-68778851	NA	TRUE
cg02574175	-0.32481	0.482589	-12.4094	7.17368e-18	3.17639e-15	30.4063	0.644994	0.320184	-0.32481	8	142160235	F	II	DENND3	Body	opensea	Body-opensea		NA	NA
cg14468280	-0.194625	0.802781	-12.4064	7.24539e-18	3.20106e-15	30.3964	0.900094	0.705469	-0.194625	20	47862976	R	II	ZNFX1	3'UTR	opensea	3'UTR-opensea		TRUE	TRUE
cg22827250	-0.266408	0.402444	-12.4018	7.36085e-18	3.24492e-15	30.3808	0.535648	0.26924	-0.266408	5	134363823	R	I	PITX1	3'UTR	island	3'UTR-island	chr5:134363092-134365146	NA	TRUE
cg14056644	-0.294675	0.308879	-12.401	7.38061e-18	3.25006e-15	30.3781	0.456217	0.161541	-0.294675	4	111559105	F	II	PITX2	TSS1500	shore	TSS1500-shore	chr4:111560563-111560808	NA	NA
cg02978297	0.210562	0.339016	12.4003	7.39755e-18	3.25394e-15	30.3758	0.233735	0.444297	0.210562	1	94057587	R	I	BCAR3	Body	opensea	Body-opensea		NA	NA	low-CpG:93830106-93830427
cg27036111	-0.25869	0.562448	-12.3967	7.48851e-18	3.2732e-15	30.3637	0.691793	0.433103	-0.25869	11	20620680	R	II	SLC6A5	TSS1500	shore	TSS1500-shore	chr11:20618197-20619920	NA	NA
cg04697056	0.312051	0.446598	12.3966	7.49035e-18	3.2732e-15	30.3635	0.290572	0.602623	0.312051	4	187565389	R	II	FAT1	Body	opensea	Body-opensea		NA	TRUE
cg00575153	0.18479	0.293955	12.3945	7.54373e-18	3.29294e-15	30.3565	0.20156	0.38635	0.18479	8	145047469	R	I	PLEC1	Body	island	Body-island	chr8:145047293-145052305	TRUE	NA
cg14425564	-0.372845	0.350331	-12.3906	7.64492e-18	3.33347e-15	30.3433	0.536753	0.163908	-0.372845	9	126794772	R	I	LHX2	Body	opensea	Body-opensea		NA	NA
cg06708634	-0.302458	0.574267	-12.3895	7.67253e-18	3.34188e-15	30.3397	0.725496	0.423038	-0.302458	6	100906895	F	II	SIM1	Body	shore	Body-shore	chr6:100905444-100905697	NA	NA		rs71757951
cg10078415	0.213588	0.231617	12.3862	7.7584e-18	3.37561e-15	30.3287	0.124822	0.338411	0.213588	16	20775011	R	II	ACSM3	TSS1500	opensea	TSS1500-opensea		TRUE	TRUE
cg15986164	-0.134562	0.859984	-12.3827	7.85214e-18	3.41016e-15	30.3168	0.927265	0.792703	-0.134562	4	901785	F	II	GAK	Body	shore	Body-shore	chr4:899774-899985	NA	TRUE
cg02515217	0.375018	0.389583	12.3826	7.85482e-18	3.41016e-15	30.3165	0.202074	0.577092	0.375018	17	57918600	R	II	MIR21	TSS200	opensea	TSS200-opensea		NA	NA
cg08718490	-0.35572	0.350684	-12.3766	8.01455e-18	3.47574e-15	30.2966	0.528544	0.172824	-0.35572	4	52943099	F	I	SPATA18	Body	island	Body-island	chr4:52942978-52943248	NA	NA
cg00585901	0.197704	0.1738	12.3743	8.07847e-18	3.49967e-15	30.2887	0.0749484	0.272652	0.197704	1	155035388	R	I	EFNA4	TSS1500	island	TSS1500-island	chr1:155034925-155036578	NA	NA
cg08782899	0.266968	0.605377	12.3725	8.12773e-18	3.51721e-15	30.2827	0.471894	0.738861	0.266968	17	79652389	R	I	ARL16	TSS1500	shore	TSS1500-shore	chr17:79650194-79651447	NA	NA
cg06563089	-0.305811	0.407311	-12.3714	8.15904e-18	3.52695e-15	30.2789	0.560217	0.254406	-0.305811	12	75601157	R	I	KCNC2	Body	island	Body-island	chr12:75601081-75601752	NA	NA
cg07336617	-0.354328	0.359077	-12.3665	8.29442e-18	3.5739e-15	30.2626	0.536241	0.181912	-0.354328	5	76935080	F	II	OTP	TSS1500	island	TSS1500-island	chr5:76934581-76935296	NA	NA
cg00463767	-0.33927	0.468609	-12.3659	8.31209e-18	3.57767e-15	30.2605	0.638244	0.298974	-0.33927	2	63282043	R	II	OTX1	Body	shore	Body-shore	chr2:63282514-63283122	NA	NA
cg10640333	-0.308909	0.477014	-12.3548	8.63093e-18	3.70694e-15	30.2232	0.631468	0.322559	-0.308909	2	63280625	R	I	OTX1	Body	shore	Body-shore	chr2:63281034-63281347	NA	NA
cg01687680	-0.28496	0.263261	-12.3496	8.78318e-18	3.76829e-15	30.2059	0.405741	0.120781	-0.28496	16	49312238	R	I	CBLN1	3'UTR	island	3'UTR-island	chr16:49311413-49312308	NA	NA
cg02051616	-0.308904	0.429668	-12.3477	8.84198e-18	3.78138e-15	30.1993	0.58412	0.275216	-0.308904	5	172661132	F	II	NKX2-5	Body	island	Body-island	chr5:172660720-172661133	NA	NA
cg14975798	-0.13387	0.711184	-12.3471	8.85784e-18	3.78412e-15	30.1975	0.778119	0.644249	-0.13387	3	111835839	F	I	C3orf52	3'UTR	opensea	3'UTR-opensea		NA	NA
cg08202226	0.408533	0.506367	12.3445	8.93874e-18	3.81462e-15	30.1885	0.302101	0.710633	0.408533	1	153896590	F	II	GATAD2B	TSS1500	shore	TSS1500-shore	chr1:153894837-153895921	NA	NA
cg10982851	-0.110869	0.890748	-12.3348	9.23551e-18	3.92584e-15	30.1562	0.946183	0.835314	-0.110869	7	4747166	R	II	FOXK1	Body	opensea	Body-opensea		NA	TRUE
cg05516272	-0.227325	0.5423	-12.3339	9.26317e-18	3.93213e-15	30.1532	0.655963	0.428637	-0.227325	11	66311334	R	I	ZDHHC24	Body	shore	Body-shore	chr11:66313169-66313822	NA	NA
cg19010490	-0.18081	0.737807	-12.3333	9.28461e-18	3.93706e-15	30.151	0.828212	0.647402	-0.18081	15	37388127	R	I	MEIS2	Body	shore	Body-shore	chr15:37387386-37387614	NA	NA
cg20666917	-0.236847	0.536437	-12.3326	9.30483e-18	3.94146e-15	30.1488	0.65486	0.418013	-0.236847	2	99439848	F	I	C2orf55	Body	island	Body-island	chr2:99438297-99439884	TRUE	NA
cg26935168	-0.239311	0.497926	-12.3306	9.37066e-18	3.96516e-15	30.1418	0.617582	0.378271	-0.239311	1	6260346	R	II	RPL22	TSS1500	shore	TSS1500-shore	chr1:6259178-6259883	NA	NA
cg09307985	-0.17292	0.81637	-12.3298	9.39301e-18	3.96624e-15	30.1395	0.90283	0.729911	-0.17292	19	36643070	R	II	COX7A1	Body	island	Body-island	chr19:36642327-36643585	TRUE	TRUE
cg02443967	0.350738	0.794778	12.3288	9.4257e-18	3.97585e-15	30.136	0.619408	0.970147	0.350738	10	98129902	R	I	TLL2	Body	opensea	Body-opensea		NA	NA
cg03147185	0.187137	0.309437	12.3274	9.47139e-18	3.99092e-15	30.1312	0.215868	0.403005	0.187137	2	97008030	F	II	NCAPH	Body	opensea	Body-opensea		NA	TRUE
cg09639151	-0.353809	0.398896	-12.3236	9.59371e-18	4.03131e-15	30.1185	0.575801	0.221992	-0.353809	5	140810920	R	I	PCDHGA4	Body	island	Body-island	chr5:140810494-140812617	NA	NA
cg00817598	-0.376264	0.380046	-12.3204	9.69892e-18	4.06716e-15	30.1077	0.568178	0.191914	-0.376264	17	44897512	R	II	WNT3	TSS1500	shore	TSS1500-shore	chr17:44895800-44897025	TRUE	NA
cg01962471	-0.164937	0.782053	-12.3198	9.71928e-18	4.0697e-15	30.1057	0.864522	0.699585	-0.164937	6	157876936	F	II	ZDHHC14	Body	opensea	Body-opensea		NA	TRUE		rs35291692
cg04166335	-0.184469	0.824044	-12.3183	9.76704e-18	4.08543e-15	30.1008	0.916278	0.731809	-0.184469	16	29996068	F	II	TAOK2	Body	shore	Body-shore	chr16:29997636-29997849	NA	NA
cg20214328	0.204691	0.270407	12.3176	9.79252e-18	4.09181e-15	30.0982	0.168062	0.372753	0.204691	19	39378302	F	II	SIRT2	Body	opensea	Body-opensea		TRUE	NA
cg25800765	-0.34526	0.386454	-12.3026	1.03027e-17	4.29602e-15	30.048	0.559084	0.213824	-0.34526	12	85673347	F	II	ALX1	TSS1500	shore	TSS1500-shore	chr12:85673878-85674700	NA	NA
cg23437479	0.334687	0.777437	12.3017	1.03363e-17	4.30554e-15	30.0447	0.610094	0.944781	0.334687	3	49940353	R	II	MST1R	1stExon	island	1stExon-island	chr3:49940099-49940431	NA	TRUE
cg11754318	-0.30007	0.499346	-12.3005	1.03776e-17	4.31379e-15	30.0408	0.649381	0.349311	-0.30007	2	176964506	R	II	HOXD12	TSS200	island	TSS200-island	chr2:176964062-176965509	NA	NA
cg10792987	-0.355574	0.436119	-12.2987	1.04424e-17	4.33622e-15	30.0346	0.613906	0.258332	-0.355574	19	18575406	F	II	ELL	Body	shelf	Body-shelf	chr19:18572408-18572619	TRUE	NA		rs7246788
cg05131483	-0.389766	0.347768	-12.2964	1.05246e-17	4.36586e-15	30.0269	0.542651	0.152885	-0.389766	16	23706242	R	II	ERN2	Body	opensea	Body-opensea		NA	TRUE
cg20823772	-0.35588	0.545035	-12.2863	1.0892e-17	4.49497e-15	29.9929	0.722975	0.367095	-0.35588	8	99962013	F	II	OSR2	Body	shore	Body-shore	chr8:99960497-99961438	NA	TRUE
cg16697850	0.281815	0.516597	12.2824	1.10342e-17	4.549e-15	29.9801	0.375689	0.657505	0.281815	7	141946928	F	II	MOXD2	TSS200	opensea	TSS200-opensea		NA	NA
cg04088697	-0.330959	0.311086	-12.2819	1.10532e-17	4.55212e-15	29.9784	0.476566	0.145607	-0.330959	7	96627050	F	II	DLX6AS	Body	opensea	Body-opensea		NA	NA		rs1476605
cg26080154	-0.182958	0.685852	-12.2803	1.11137e-17	4.57236e-15	29.9729	0.777331	0.594373	-0.182958	11	1314228	R	I	TOLLIP	Body	shore	Body-shore	chr11:1315467-1317115	NA	NA
cg14319235	-0.368068	0.437645	-12.2727	1.14048e-17	4.6828e-15	29.9474	0.621679	0.253611	-0.368068	1	79472282	R	II	ELTD1	Body	island	Body-island	chr1:79472281-79472537	NA	TRUE
cg15658676	-0.201807	0.776203	-12.2727	1.14055e-17	4.6828e-15	29.9473	0.877106	0.675299	-0.201807	6	53530538	F	II	KLHL31	TSS200	opensea	TSS200-opensea		NA	NA
cg07551060	0.450474	0.560531	12.2692	1.15432e-17	4.72965e-15	29.9354	0.335294	0.785768	0.450474	10	121075316	F	II	GRK5	Body	opensea	Body-opensea		TRUE	TRUE
cg03053579	-0.325911	0.321833	-12.2677	1.16033e-17	4.74942e-15	29.9303	0.484789	0.158878	-0.325911	10	102987483	R	II	LBX1	Body	island	Body-island	chr10:102984182-102990063	NA	NA
cg11993173	0.285034	0.354064	12.2641	1.17466e-17	4.80316e-15	29.9181	0.211546	0.496581	0.285034	8	54857695	R	II	RGS20	Body	opensea	Body-opensea		TRUE	TRUE
cg12389770	-0.366987	0.404518	-12.263	1.17874e-17	4.8149e-15	29.9147	0.588011	0.221024	-0.366987	6	101847706	R	II	GRIK2	Body	shore	Body-shore	chr6:101846766-101847135	NA	NA
cg08833577	-0.327687	0.311439	-12.2613	1.18561e-17	4.83313e-15	29.9089	0.475283	0.147595	-0.327687	10	118899288	R	I	VAX1	TSS1500	island	TSS1500-island	chr10:118899247-118900329	NA	NA
cg21908886	0.355725	0.649984	12.2577	1.20032e-17	4.88813e-15	29.8967	0.472121	0.827847	0.355725	1	166039444	F	II	FAM78B	3'UTR	opensea	3'UTR-opensea		NA	NA
cg21896766	-0.384773	0.476461	-12.2551	1.21083e-17	4.91592e-15	29.8881	0.668847	0.284075	-0.384773	8	114444395	F	II	CSMD3	Body	shore	Body-shore	chr8:114444826-114445085	NA	NA
cg15488143	-0.14137	0.846087	-12.2544	1.21402e-17	4.92388e-15	29.8855	0.916773	0.775402	-0.14137	7	128924101	F	II	AHCYL2	Body	opensea	Body-opensea		NA	TRUE		rs35183043
cg06903075	-0.0804768	0.904456	-12.2331	1.30516e-17	5.26688e-15	29.8138	0.944694	0.864217	-0.0804768	11	71709751	F	II	IL18BP	TSS1500	opensea	TSS1500-opensea		NA	NA
cg07181702	0.323588	0.37897	12.2194	1.36749e-17	5.50363e-15	29.7676	0.217176	0.540764	0.323588	17	57918682	R	II	MIR21	Body	opensea	Body-opensea		NA	NA
cg27175287	-0.285174	0.5052	-12.2124	1.40053e-17	5.62345e-15	29.744	0.647787	0.362613	-0.285174	1	47883234	F	II	FOXE3	3'UTR	shore	3'UTR-shore	chr1:47881896-47883065	NA	TRUE
cg19172487	-0.154468	0.85841	-12.2119	1.40309e-17	5.62806e-15	29.7422	0.935644	0.781176	-0.154468	22	44394856	R	II	PARVB	TSS1500	shelf	TSS1500-shelf	chr22:44392309-44392669	NA	NA
cg15958034	-0.167465	0.772872	-12.2105	1.40965e-17	5.64228e-15	29.7376	0.856605	0.68914	-0.167465	13	97889396	F	II	MBNL2	5'UTR	opensea	5'UTR-opensea		NA	TRUE
cg16927040	-0.303837	0.242833	-12.2101	1.41157e-17	5.64228e-15	29.7362	0.394752	0.0909146	-0.303837	3	187388128	R	I	SST	1stExon	island	1stExon-island	chr3:187387914-187388176	NA	TRUE
cg00966482	-0.117354	0.852491	-12.21	1.41226e-17	5.64228e-15	29.7358	0.911168	0.793814	-0.117354	6	11111926	F	II	HERV-FRD	1stExon	opensea	1stExon-opensea		NA	NA
cg09142117	-0.105095	0.886406	-12.2053	1.43501e-17	5.72745e-15	29.7199	0.938954	0.833859	-0.105095	16	2079658	R	II	SLC9A3R2	Body	shelf	Body-shelf	chr16:2077042-2077470	NA	NA
cg11312408	-0.303219	0.262891	-12.2042	1.44019e-17	5.7424e-15	29.7164	0.414501	0.111282	-0.303219	13	58207013	F	II	PCDH17	1stExon	island	1stExon-island	chr13:58206526-58208930	NA	NA
cg13466383	0.212103	0.286698	12.1982	1.47019e-17	5.85037e-15	29.696	0.180647	0.39275	0.212103	1	161008705	F	I	TSTD1	5'UTR	island	5'UTR-island	chr1:161008377-161008830	TRUE	NA
cg10933003	-0.285676	0.623534	-12.1869	1.52769e-17	6.06712e-15	29.658	0.766372	0.480696	-0.285676	4	174448341	R	II	HAND2	3'UTR	island	3'UTR-island	chr4:174448333-174448845	NA	NA
cg08337166	0.269206	0.581961	12.1819	1.55422e-17	6.1664e-15	29.6409	0.447358	0.716564	0.269206	12	108686134	F	II	CMKLR1	Body	opensea	Body-opensea		NA	NA
cg14794735	-0.106768	0.84887	-12.1791	1.56906e-17	6.21911e-15	29.6315	0.902253	0.795486	-0.106768	7	129415968	F	II	MIR183	TSS1500	shelf	TSS1500-shelf	chr7:129418286-129422509	NA	NA		rs78257223
cg02632314	0.315609	0.363472	12.1782	1.57406e-17	6.23277e-15	29.6284	0.205668	0.521276	0.315609	13	41593416	F	II	ELF1	5'UTR	opensea	5'UTR-opensea		NA	NA	low-CpG:40491405-40491505
cg21697512	-0.175256	0.764704	-12.1704	1.61627e-17	6.38554e-15	29.6022	0.852331	0.677076	-0.175256	1	208081541	R	II	CD34	Body	shelf	Body-shelf	chr1:208084098-208084513	NA	NA
cg03018496	0.351266	0.540852	12.1695	1.62149e-17	6.39528e-15	29.599	0.365219	0.716484	0.351266	15	96868989	R	II	NR2F2	TSS200	shelf	TSS200-shelf	chr15:96864881-96866787	NA	TRUE
cg18139800	-0.19323	0.750166	-12.164	1.65247e-17	6.50468e-15	29.5802	0.846781	0.653551	-0.19323	6	32151517	F	II	AGER	Body	opensea	Body-opensea		NA	NA		rs2555465
cg05802386	0.346708	0.706629	12.1616	1.66561e-17	6.53327e-15	29.5724	0.533275	0.879984	0.346708	1	43422920	F	II	SLC2A1	Body	shore	Body-shore	chr1:43423467-43424768	NA	NA
cg13307880	-0.374289	0.421563	-12.1615	1.66626e-17	6.53327e-15	29.572	0.608707	0.234418	-0.374289	5	140744367	R	II	PCDHGA4	Body	island	Body-island	chr5:140743961-140744642	NA	NA
cg19519747	-0.308694	0.406582	-12.1606	1.67126e-17	6.54647e-15	29.569	0.560929	0.252235	-0.308694	2	177014555	F	I	MIR10B	TSS1500	shore	TSS1500-shore	chr2:177014948-177015214	NA	NA		rs74849124
cg18693673	-0.348347	0.3664	-12.1596	1.67694e-17	6.56233e-15	29.5657	0.540573	0.192226	-0.348347	19	58629975	R	II	ZSCAN18	TSS200	island	TSS200-island	chr19:58629309-58630241	NA	NA
cg07804076	-0.28261	0.442718	-12.1516	1.72384e-17	6.73926e-15	29.5384	0.584023	0.301414	-0.28261	5	140741730	F	II	PCDHGA4	Body	island	Body-island	chr5:140741174-140741738	NA	NA		rs57735633	rs62378417
cg08331427	-0.103654	0.899385	-12.1369	1.81259e-17	7.07243e-15	29.4887	0.951212	0.847558	-0.103654	5	138842004	R	II	ECSCR	Body	opensea	Body-opensea		NA	TRUE
cg08195983	0.156679	0.352219	12.1333	1.83492e-17	7.14564e-15	29.4765	0.273879	0.430558	0.156679	3	61235829	R	I	FHIT	5'UTR	shore	5'UTR-shore	chr3:61236606-61237227	TRUE	NA
cg11001085	0.289822	0.794718	12.1324	1.84053e-17	7.16054e-15	29.4735	0.649806	0.939629	0.289822	3	49940126	F	II	MST1R	1stExon	island	1stExon-island	chr3:49940099-49940431	NA	TRUE
cg07180538	-0.265869	0.756247	-12.1321	1.84248e-17	7.16119e-15	29.4725	0.889181	0.623312	-0.265869	7	4786899	R	I	FOXK1	Body	island	Body-island	chr7:4786761-4786987	NA	NA
cg02385728	0.257112	0.7477	12.128	1.86853e-17	7.24837e-15	29.4586	0.619144	0.876256	0.257112	9	133803377	F	II	FIBCD1	Body	shore	Body-shore	chr9:133805004-133805453	NA	NA
cg25547580	-0.355509	0.286341	-12.1252	1.8865e-17	7.30391e-15	29.4491	0.464096	0.108587	-0.355509	18	55103734	F	I	ONECUT2	1stExon	island	1stExon-island	chr18:55103154-55108853	NA	NA
cg06051311	0.42157	0.564772	12.1223	1.90521e-17	7.35504e-15	29.4393	0.353987	0.775557	0.42157	6	30131001	F	II	TRIM15	5'UTR	opensea	5'UTR-opensea		NA	TRUE
cg00336320	-0.274868	0.301941	-12.1198	1.92185e-17	7.41215e-15	29.4307	0.439375	0.164507	-0.274868	6	36253099	F	I	PNPLA1	5'UTR	opensea	5'UTR-opensea		NA	NA		rs77449948
cg04910970	-0.27015	0.628725	-12.1124	1.97093e-17	7.57229e-15	29.4057	0.7638	0.49365	-0.27015	6	100053930	F	II	PRDM13	TSS1500	shore	TSS1500-shore	chr6:100054686-100054988	NA	NA
cg07489048	-0.332955	0.393784	-12.1119	1.97423e-17	7.5777e-15	29.4041	0.560261	0.227306	-0.332955	14	29236898	R	I	FOXG1	1stExon	island	1stExon-island	chr14:29236835-29237832	NA	NA	high-CpG:28306416-28306742
cg25736251	0.210248	0.374642	12.108	2.00091e-17	7.65809e-15	29.3908	0.269518	0.479766	0.210248	3	61235869	F	I	FHIT	5'UTR	shore	5'UTR-shore	chr3:61236606-61237227	TRUE	NA
cg21113740	-0.313472	0.4164	-12.1054	2.01869e-17	7.71627e-15	29.382	0.573137	0.259664	-0.313472	1	79472343	R	I	ELTD1	5'UTR	island	5'UTR-island	chr1:79472281-79472537	NA	TRUE
cg26673195	0.274296	0.519921	12.1052	2.01996e-17	7.71627e-15	29.3814	0.382773	0.657069	0.274296	17	41052729	R	II	G6PC	TSS200	opensea	TSS200-opensea		NA	NA
cg06440348	-0.191842	0.787347	-12.1029	2.03603e-17	7.77024e-15	29.3736	0.883268	0.691425	-0.191842	4	81111527	F	II	PRDM8	5'UTR	shore	5'UTR-shore	chr4:81109887-81110460	NA	NA
cg13020466	-0.115415	0.884639	-12.1017	2.04457e-17	7.78925e-15	29.3694	0.942347	0.826932	-0.115415	17	76416705	F	II	PGS1	3'UTR	opensea	3'UTR-opensea		NA	NA	low-CpG:73928294-73928305
cg16798252	-0.251599	0.337105	-12.1016	2.04498e-17	7.78925e-15	29.3692	0.462905	0.211306	-0.251599	2	200334402	F	I	FLJ32063	Body	shore	Body-shore	chr2:200335497-200336413	NA	TRUE
cg19447686	0.17072	0.288748	12.1014	2.04684e-17	7.78925e-15	29.3683	0.203388	0.374108	0.17072	12	53448085	F	I	TENC1	Body	island	Body-island	chr12:53448008-53448406	NA	NA
cg14621217	-0.409128	0.362272	-12.0936	2.1023e-17	7.97758e-15	29.3419	0.566836	0.157708	-0.409128	17	80944134	F	II	B3GNTL1	Body	opensea	Body-opensea		TRUE	NA		rs9916813
cg18116174	-0.148177	0.81098	-12.0914	2.11776e-17	8.02865e-15	29.3346	0.885069	0.736892	-0.148177	5	142311682	F	II	ARHGAP26	Body	opensea	Body-opensea		NA	TRUE
cg26365545	-0.320836	0.449251	-12.0884	2.13957e-17	8.10364e-15	29.3245	0.609669	0.288833	-0.320836	5	76932016	F	I	OTP	Body	shore	Body-shore	chr5:76932317-76933523	NA	NA
cg06665333	-0.116974	0.85404	-12.0866	2.15333e-17	8.14219e-15	29.3181	0.912527	0.795553	-0.116974	16	87873837	F	I	SLC7A5	Body	opensea	Body-opensea		NA	NA
cg10647833	-0.167533	0.755596	-12.0865	2.15381e-17	8.14219e-15	29.3179	0.839363	0.671829	-0.167533	6	167047842	F	I	RPS6KA2	Body	opensea	Body-opensea		NA	NA
cg04904318	-0.31842	0.717883	-12.0818	2.18852e-17	8.26374e-15	29.3021	0.877093	0.558673	-0.31842	17	46607828	R	I	HOXB1	1stExon	island	1stExon-island	chr17:46607804-46608390	NA	NA		rs7207109
cg17556527	-0.225953	0.793991	-12.0816	2.19009e-17	8.26374e-15	29.3013	0.906968	0.681015	-0.225953	11	67859023	R	II	CHKA	Body	opensea	Body-opensea		NA	TRUE
cg10511988	-0.410418	0.439708	-12.0781	2.2167e-17	8.35629e-15	29.2894	0.644916	0.234499	-0.410418	10	118891706	F	II	VAX1	3'UTR	shore	3'UTR-shore	chr10:118892161-118892639	NA	NA		rs74159040
cg08465346	-0.34934	0.430121	-12.0746	2.24357e-17	8.44238e-15	29.2775	0.604791	0.255451	-0.34934	12	54441458	R	I	HOXC4	5'UTR	island	5'UTR-island	chr12:54440642-54441543	NA	NA
cg17562299	-0.126689	0.855045	-12.0668	2.30453e-17	8.6467e-15	29.2509	0.91839	0.791701	-0.126689	11	63674850	F	II	MARK2	Body	shore	Body-shore	chr11:63676319-63676649	TRUE	TRUE
cg23090870	0.160124	0.359468	12.0613	2.34798e-17	8.79329e-15	29.2324	0.279406	0.43953	0.160124	19	38755753	F	I	SPINT2	Body	shore	Body-shore	chr19:38754846-38755699	TRUE	NA
cg02345961	-0.280751	0.421514	-12.0598	2.35982e-17	8.82936e-15	29.2274	0.56189	0.281139	-0.280751	18	34854574	F	II	BRUNOL4	Body	island	Body-island	chr18:34854247-34855163	NA	NA
cg20078624	-0.153669	0.832158	-12.0593	2.36377e-17	8.83591e-15	29.2258	0.908992	0.755324	-0.153669	15	22922301	F	I	CYFIP1	5'UTR	opensea	5'UTR-opensea		NA	NA		rs7171395
cg17723299	0.12731	0.193859	12.0532	2.41377e-17	9.006e-15	29.205	0.130203	0.257514	0.12731	1	197744929	R	I	DENND1B	TSS1500	shore	TSS1500-shore	chr1:197743931-197744788	NA	TRUE	high-CpG:196010757-196011580
cg04951797	0.195074	0.230932	12.0513	2.42987e-17	9.05675e-15	29.1985	0.133395	0.328469	0.195074	3	20226964	F	II	SGOL1	5'UTR	shore	5'UTR-shore	chr3:20227289-20227956	NA	NA
cg25647583	-0.30729	0.466692	-12.0511	2.43189e-17	9.05675e-15	29.1976	0.620337	0.313047	-0.30729	15	91427184	F	II	FES	TSS1500	shore	TSS1500-shore	chr15:91427540-91427905	TRUE	NA
cg14456683	-0.295323	0.546598	-12.0457	2.47733e-17	9.21737e-15	29.1793	0.694259	0.398936	-0.295323	3	147127010	R	II	ZIC1	TSS200	island	TSS200-island	chr3:147126988-147128999	TRUE	NA
cg12782180	-0.289594	0.496284	-12.0425	2.5048e-17	9.31096e-15	29.1684	0.641081	0.351487	-0.289594	7	127880932	F	I	LEP	TSS1500	island	TSS1500-island	chr7:127880750-127881375	NA	NA
cg06920324	-0.0780847	0.921239	-12.0405	2.52125e-17	9.36341e-15	29.1619	0.960281	0.882196	-0.0780847	7	149264011	F	II	ZNF767	Body	opensea	Body-opensea		NA	TRUE
cg14294859	-0.434211	0.421761	-12.0401	2.52498e-17	9.3667e-15	29.1604	0.638867	0.204656	-0.434211	9	130862556	R	I	SLC25A25	Body	opensea	Body-opensea		NA	TRUE
cg01799521	-0.144798	0.835366	-12.039	2.53508e-17	9.38868e-15	29.1565	0.907766	0.762967	-0.144798	1	39305163	R	II	RRAGC	3'UTR	opensea	3'UTR-opensea		NA	NA
cg13841603	-0.330081	0.362351	-12.035	2.56938e-17	9.48939e-15	29.1432	0.527391	0.19731	-0.330081	6	127839822	F	II	C6orf174	5'UTR	shelf	5'UTR-shelf	chr6:127835928-127836255	NA	NA
cg01978237	-0.373079	0.421037	-12.0348	2.57183e-17	9.48969e-15	29.1422	0.607577	0.234498	-0.373079	6	100896803	F	II	SIM1	Body	shore	Body-shore	chr6:100897080-100897621	NA	NA
cg23994043	-0.316105	0.36828	-12.0317	2.59855e-17	9.57946e-15	29.132	0.526333	0.210228	-0.316105	2	200326725	R	I	SATB2	TSS1500	island	TSS1500-island	chr2:200320502-200329681	NA	NA
cg15503081	0.304407	0.519012	12.0233	2.67477e-17	9.83331e-15	29.1034	0.366809	0.671216	0.304407	19	12992867	F	II	DNASE2	TSS1500	shore	TSS1500-shore	chr19:12991690-12992508	NA	NA		rs1210384
cg06247406	-0.358548	0.340904	-12.0229	2.67839e-17	9.83759e-15	29.102	0.520178	0.16163	-0.358548	6	101846791	R	II	GRIK2	TSS200	island	TSS200-island	chr6:101846766-101847135	NA	NA
cg12863443	0.24678	0.72682	12.0223	2.68439e-17	9.8506e-15	29.0998	0.60343	0.85021	0.24678	10	99894013	F	II	C10orf28	TSS1500	shore	TSS1500-shore	chr10:99894265-99894914	NA	NA
cg13677149	-0.367855	0.314656	-12.0202	2.70328e-17	9.89275e-15	29.0929	0.498584	0.130729	-0.367855	7	27284789	R	I	EVX1	Body	island	Body-island	chr7:27284639-27286237	NA	NA
cg17298751	-0.291487	0.669064	-12.0194	2.71096e-17	9.9118e-15	29.0901	0.814808	0.523321	-0.291487	11	22363370	F	II	SLC17A6	Body	island	Body-island	chr11:22362862-22363377	NA	NA		rs1562447
cg26086029	-0.104158	0.867171	-12.0146	2.75588e-17	1.00668e-14	29.0738	0.91925	0.815092	-0.104158	14	92591610	F	II	CPSF2	5'UTR	shelf	5'UTR-shelf	chr14:92587549-92589022	NA	NA
cg07223180	-0.213241	0.685683	-12.0134	2.76789e-17	1.01015e-14	29.0695	0.792304	0.579063	-0.213241	13	20989142	R	II	CRYL1	Body	island	Body-island	chr13:20989007-20989836	NA	NA
cg01054938	0.279484	0.739148	12.0124	2.77689e-17	1.01252e-14	29.0663	0.599407	0.87889	0.279484	17	48712923	R	II	ABCC3	Body	shore	Body-shore	chr17:48712050-48712705	TRUE	TRUE
cg23077820	-0.233773	0.714275	-12.0121	2.77999e-17	1.01272e-14	29.0652	0.831161	0.597388	-0.233773	2	223154176	F	II	PAX3	Body	shore	Body-shore	chr2:223155726-223156154	NA	NA
cg10965178	-0.147578	0.757922	-12.0106	2.79445e-17	1.01522e-14	29.06	0.831711	0.684133	-0.147578	1	43766752	R	I	TIE1	1stExon	shelf	1stExon-shelf	chr1:43770522-43770880	NA	NA
cg03935060	0.319566	0.607127	12.0106	2.79446e-17	1.01522e-14	29.06	0.447344	0.766909	0.319566	16	10272021	R	I	GRIN2A	Body	shore	Body-shore	chr16:10273943-10277424	NA	NA
cg07676709	-0.30078	0.569104	-12.0071	2.82787e-17	1.02643e-14	29.0483	0.719494	0.418714	-0.30078	17	46673442	F	II	LOC404266	Body	shore	Body-shore	chr17:46673532-46674181	NA	NA
cg12362629	-0.187316	0.780073	-12.0067	2.83237e-17	1.02713e-14	29.0467	0.873731	0.686416	-0.187316	22	36716469	F	II	MYH9	Body	shore	Body-shore	chr22:36718450-36718760	NA	NA
cg11998307	-0.135344	0.821245	-12.0001	2.89674e-17	1.04669e-14	29.0244	0.888917	0.753573	-0.135344	17	1549434	F	II	SCARF1	TSS1500	shelf	TSS1500-shelf	chr17:1551730-1553249	NA	NA
cg18901278	0.222479	0.26911	11.998	2.91839e-17	1.05356e-14	29.0171	0.15787	0.380349	0.222479	17	76128531	F	II	TMC8	Body	shore	Body-shore	chr17:76127521-76128406	NA	NA			rs61755873
cg06569947	-0.116497	0.89562	-11.995	2.94783e-17	1.06184e-14	29.0071	0.953869	0.837372	-0.116497	13	114126889	F	II	DCUN1D2	Body	opensea	Body-opensea		NA	NA
cg24753760	-0.375144	0.359366	-11.9946	2.95188e-17	1.06184e-14	29.0058	0.546938	0.171794	-0.375144	6	101846767	R	II	GRIK2	TSS200	island	TSS200-island	chr6:101846766-101847135	NA	NA
cg21610839	-0.161545	0.780674	-11.9946	2.95193e-17	1.06184e-14	29.0057	0.861447	0.699902	-0.161545	3	23861312	R	II	UBE2E1	Body	opensea	Body-opensea		NA	TRUE
cg00460457	-0.162565	0.864382	-11.9917	2.98155e-17	1.07154e-14	28.9958	0.945664	0.783099	-0.162565	22	41631801	F	II	CHADL	Body	shore	Body-shore	chr22:41633520-41634842	NA	NA
cg15495091	-0.131491	0.854994	-11.9871	3.02897e-17	1.08663e-14	28.9802	0.92074	0.789249	-0.131491	13	113491819	F	I	ATP11A	Body	shore	Body-shore	chr13:113492486-113492836	NA	NA
cg24989962	-0.327113	0.277444	-11.9868	3.03238e-17	1.08688e-14	28.9791	0.441	0.113887	-0.327113	14	52734286	F	I	PTGDR	TSS200	island	TSS200-island	chr14:52734207-52735486	NA	NA
cg09684112	-0.209643	0.582351	-11.9854	3.04739e-17	1.09129e-14	28.9742	0.687172	0.47753	-0.209643	10	13701447	R	I	FRMD4A	Body	shore	Body-shore	chr10:13698562-13699540	NA	NA
cg03563630	-0.371884	0.277732	-11.9846	3.05495e-17	1.09301e-14	28.9718	0.463674	0.0917897	-0.371884	20	37435477	R	II	PPP1R16B	5'UTR	island	5'UTR-island	chr20:37434206-37435592	NA	NA
cg17849569	-0.200056	0.501842	-11.9838	3.06439e-17	1.09541e-14	28.9687	0.601871	0.401814	-0.200056	6	28058911	F	I	ZSCAN12L1	TSS200	opensea	TSS200-opensea		NA	NA		rs35902873	rs78527986
cg15387123	0.231959	0.347661	11.9825	3.07728e-17	1.09904e-14	28.9646	0.231682	0.463641	0.231959	9	139891058	R	II	CLIC3	TSS200	shore	TSS200-shore	chr9:139888934-139890343	NA	TRUE
cg03881775	-0.256345	0.287461	-11.9798	3.10585e-17	1.10743e-14	28.9554	0.415634	0.159288	-0.256345	3	147111135	R	I	ZIC4	Body	island	Body-island	chr3:147108511-147111703	TRUE	TRUE
cg08587845	-0.219301	0.311609	-11.9798	3.10629e-17	1.10743e-14	28.9553	0.42126	0.201959	-0.219301	5	134870506	F	I	NEUROG1	1stExon	shore	1stExon-shore	chr5:134870740-134872051	NA	NA		rs35758773
cg04556126	-0.404681	0.446375	-11.9776	3.13016e-17	1.11396e-14	28.9477	0.648716	0.244034	-0.404681	3	147106561	R	II	ZIC4	3'UTR	shore	3'UTR-shore	chr3:147108511-147111703	NA	NA
cg03421657	0.339768	0.583961	11.9738	3.17092e-17	1.12546e-14	28.9349	0.414077	0.753845	0.339768	1	166039754	R	II	FAM78B	Body	opensea	Body-opensea		NA	NA
cg15935770	-0.406364	0.463722	-11.9694	3.21996e-17	1.14085e-14	28.9197	0.666904	0.260541	-0.406364	14	70160160	F	II	KIAA0247	Body	opensea	Body-opensea		NA	TRUE
cg20087519	-0.244271	0.589984	-11.9671	3.24535e-17	1.14883e-14	28.9119	0.71212	0.467849	-0.244271	10	135379242	R	I	SYCE1	TSS200	island	TSS200-island	chr10:135378883-135379767	NA	NA
cg13747967	0.256565	0.390237	11.9664	3.25231e-17	1.15028e-14	28.9098	0.261954	0.518519	0.256565	16	57392618	R	II	CCL22	TSS200	opensea	TSS200-opensea		NA	NA
cg08288811	-0.210003	0.355777	-11.9662	3.25539e-17	1.15035e-14	28.9088	0.460778	0.250775	-0.210003	5	140180926	R	I	PCDHA2	Body	island	Body-island	chr5:140180844-140181082	NA	NA
cg05821464	0.237141	0.644187	11.9625	3.2966e-17	1.16286e-14	28.8964	0.525617	0.762758	0.237141	22	47057502	R	II	GRAMD4	Body	shore	Body-shore	chr22:47058870-47059114	TRUE	TRUE
cg22203219	-0.334343	0.389189	-11.9615	3.30802e-17	1.16586e-14	28.8929	0.55636	0.222017	-0.334343	12	6665335	F	II	IFFO1	TSS200	island	TSS200-island	chr12:6664425-6665336	NA	NA
cg14871932	-0.299376	0.245048	-11.9609	3.31496e-17	1.16728e-14	28.8909	0.394736	0.0953597	-0.299376	7	44185323	R	I	GCK	Body	island	Body-island	chr7:44184770-44185695	NA	NA
cg19702785	-0.284526	0.411117	-11.9606	3.31881e-17	1.16761e-14	28.8897	0.553381	0.268854	-0.284526	20	43727089	R	II	KCNS1	Body	island	Body-island	chr20:43726297-43727372	TRUE	NA
cg06345789	0.1651	0.284914	11.9448	3.50384e-17	1.22947e-14	28.836	0.202364	0.367464	0.1651	17	43325791	R	I	LOC100133991	Body	shore	Body-shore	chr17:43324689-43325729	NA	NA
cg12444411	-0.225864	0.619648	-11.9439	3.51423e-17	1.23204e-14	28.8331	0.732579	0.506716	-0.225864	7	2802554	F	I	GNA12	Body	island	Body-island	chr7:2802440-2802698	NA	TRUE			rs75012075
cg24948406	-0.267919	0.766151	-11.9434	3.52109e-17	1.23336e-14	28.8311	0.90011	0.632191	-0.267919	17	46608268	R	II	HOXB1	5'UTR	island	5'UTR-island	chr17:46607804-46608390	NA	TRUE
cg08690859	-0.256116	0.317968	-11.9424	3.53311e-17	1.2357e-14	28.8277	0.446026	0.18991	-0.256116	2	200333729	F	I	FLJ32063	Body	island	Body-island	chr2:200333687-200334172	NA	TRUE
cg08754088	0.229178	0.517651	11.9423	3.53392e-17	1.2357e-14	28.8275	0.403062	0.63224	0.229178	8	35501934	R	II	UNC5D	Body	opensea	Body-opensea		NA	TRUE
cg08237401	0.315524	0.624923	11.9415	3.54439e-17	1.2372e-14	28.8246	0.467161	0.782685	0.315524	1	94057789	R	II	BCAR3	Body	opensea	Body-opensea		NA	NA	low-CpG:93830106-93830427
cg00240178	0.283673	0.696941	11.9403	3.55891e-17	1.24011e-14	28.8205	0.555104	0.838777	0.283673	6	74232108	R	II	EEF1A1	TSS1500	shore	TSS1500-shore	chr6:74233268-74233546	NA	NA
cg19801120	-0.222358	0.677504	-11.939	3.57451e-17	1.24446e-14	28.8162	0.788683	0.566325	-0.222358	6	53530570	R	II	KLHL31	TSS200	opensea	TSS200-opensea		NA	NA
cg14935716	-0.130068	0.87837	-11.9359	3.61271e-17	1.25545e-14	28.8057	0.943404	0.813336	-0.130068	8	133805351	F	II	PHF20L1	Body	opensea	Body-opensea		NA	TRUE
cg04654530	-0.31384	0.38238	-11.9255	3.74528e-17	1.29827e-14	28.77	0.5393	0.22546	-0.31384	2	63282702	F	I	OTX1	Body	island	Body-island	chr2:63282514-63283122	NA	TRUE		rs75832508
cg00448814	-0.160491	0.8072	-11.9222	3.78727e-17	1.31056e-14	28.759	0.887445	0.726954	-0.160491	6	28227482	R	II	NKAPL	1stExon	island	1stExon-island	chr6:28226979-28227483	NA	NA			rs77742720
cg03120185	-0.362167	0.328866	-11.9181	3.8413e-17	1.32582e-14	28.7449	0.50995	0.147783	-0.362167	6	100054118	F	II	PRDM13	TSS1500	shore	TSS1500-shore	chr6:100054686-100054988	NA	NA
cg17380661	-0.399315	0.301231	-11.9164	3.86471e-17	1.33212e-14	28.7389	0.500888	0.101573	-0.399315	6	100912946	R	I	SIM1	TSS1500	island	TSS1500-island	chr6:100912071-100913337	TRUE	NA			rs3756916
cg05165862	-0.173145	0.803525	-11.9162	3.86618e-17	1.33212e-14	28.7385	0.890098	0.716953	-0.173145	12	50030609	F	II	PRPF40B	Body	opensea	Body-opensea		NA	TRUE
cg09975715	-0.127836	0.842871	-11.9137	3.89985e-17	1.34026e-14	28.7299	0.906788	0.778953	-0.127836	17	8379050	F	II	MYH10	3'UTR	shore	3'UTR-shore	chr17:8380172-8380539	NA	NA
cg26421308	-0.125918	0.861923	-11.9054	4.01357e-17	1.37508e-14	28.7015	0.924883	0.798964	-0.125918	11	86663040	F	II	FZD4	Body	shelf	Body-shelf	chr11:86665901-86666567	NA	NA	low-CpG:86339793-86341091
cg08928753	-0.304322	0.596786	-11.9051	4.01717e-17	1.37508e-14	28.7006	0.748948	0.444625	-0.304322	1	43770707	F	I	TIE1	Body	island	Body-island	chr1:43770522-43770880	NA	NA
cg09622982	0.163415	0.162218	11.9003	4.08502e-17	1.39671e-14	28.684	0.0805103	0.243925	0.163415	2	133428523	F	II	LYPD1	TSS200	island	TSS200-island	chr2:133426652-133428870	TRUE	NA
cg24079381	0.25899	0.470647	11.8934	4.18337e-17	1.42547e-14	28.6604	0.341152	0.600143	0.25899	17	77115473	F	II	HRNBP3	5'UTR	opensea	5'UTR-opensea		NA	NA		rs61382501
cg14287742	-0.114812	0.883534	-11.8903	4.22734e-17	1.43737e-14	28.6501	0.94094	0.826128	-0.114812	1	169335773	F	II	BLZF1	TSS1500	opensea	TSS1500-opensea		NA	NA
cg16065899	-0.274057	0.52561	-11.8902	4.22895e-17	1.43737e-14	28.6497	0.662639	0.388582	-0.274057	11	44332958	F	II	ALX4	TSS1500	shore	TSS1500-shore	chr11:44330542-44331761	TRUE	NA		rs2054030
cg16581308	0.334547	0.712925	11.8902	4.22905e-17	1.43737e-14	28.6497	0.545652	0.880199	0.334547	4	16862080	R	II	LDB2	Body	opensea	Body-opensea		NA	TRUE
cg21151287	-0.0792924	0.86717	-11.8882	4.25838e-17	1.44611e-14	28.6428	0.906816	0.827523	-0.0792924	5	14488003	R	I	TRIO	Body	island	Body-island	chr5:14487930-14488536	NA	TRUE
cg02053092	-0.121638	0.858544	-11.8819	4.35297e-17	1.47698e-14	28.6211	0.919363	0.797725	-0.121638	6	119220428	F	II	ASF1A	Body	shelf	Body-shelf	chr6:119215454-119216457	NA	NA
cg10591607	-0.373634	0.32704	-11.8803	4.37707e-17	1.4839e-14	28.6156	0.513857	0.140223	-0.373634	6	101846916	F	II	GRIK2	1stExon	island	1stExon-island	chr6:101846766-101847135	NA	NA
cg20444218	-0.174232	0.758817	-11.8781	4.41024e-17	1.49388e-14	28.6081	0.845933	0.671701	-0.174232	11	73024037	F	II	ARHGEF17	Body	shelf	Body-shelf	chr11:73018452-73020563	NA	NA
cg25416125	-0.210431	0.644033	-11.8777	4.41642e-17	1.49472e-14	28.6067	0.749249	0.538818	-0.210431	12	56329615	R	II	DGKA	5'UTR	island	5'UTR-island	chr12:56329518-56329790	NA	NA
cg05944137	-0.341159	0.443856	-11.8734	4.48172e-17	1.51298e-14	28.5922	0.614435	0.273276	-0.341159	7	155301734	R	II	CNPY1	5'UTR	shore	5'UTR-shore	chr7:155302253-155303158	NA	NA
cg19064523	-0.253107	0.416581	-11.8728	4.4907e-17	1.51474e-14	28.5902	0.543134	0.290027	-0.253107	7	19158210	F	II	TWIST1	TSS1500	shore	TSS1500-shore	chr7:19156050-19158042	NA	NA
cg17353337	-0.322583	0.670901	-11.8669	4.58351e-17	1.54215e-14	28.57	0.832192	0.509609	-0.322583	6	138866898	F	II	NHSL1	Body	opensea	Body-opensea		NA	TRUE	low-CpG:138908496-138908826
cg22407942	0.34289	0.475541	11.8646	4.62077e-17	1.54948e-14	28.5619	0.304096	0.646986	0.34289	7	22894828	F	II	SNORD93	TSS1500	shore	TSS1500-shore	chr7:22893794-22894577	NA	NA		rs3834336
cg02521750	-0.203424	0.744201	-11.864	4.63004e-17	1.55129e-14	28.5599	0.845913	0.64249	-0.203424	16	81712054	R	I	CMIP	Body	island	Body-island	chr16:81711864-81712214	NA	NA
cg03942051	-0.320381	0.427551	-11.8635	4.63815e-17	1.55263e-14	28.5582	0.587742	0.26736	-0.320381	1	119532655	R	II	TBX15	TSS1500	shore	TSS1500-shore	chr1:119529819-119530712	NA	NA
cg15890103	-0.109657	0.890974	-11.8605	4.68588e-17	1.56346e-14	28.5481	0.945802	0.836145	-0.109657	11	86663160	F	II	FZD4	Body	shelf	Body-shelf	chr11:86665901-86666567	NA	NA	low-CpG:86339793-86341091
cg04947157	0.294644	0.372954	11.8571	4.74103e-17	1.57923e-14	28.5365	0.225632	0.520276	0.294644	17	76128481	F	II	TMC8	Body	shore	Body-shore	chr17:76127521-76128406	NA	NA
cg15045356	-0.120011	0.822206	-11.8493	4.87061e-17	1.61836e-14	28.5098	0.882212	0.7622	-0.120011	11	11969590	F	I	USP47	Body	opensea	Body-opensea		NA	TRUE
cg17777676	-0.270731	0.371933	-11.8446	4.95104e-17	1.64372e-14	28.4936	0.507299	0.236567	-0.270731	5	140186895	R	I	PCDHA2	Body	island	Body-island	chr5:140186792-140187268	NA	NA
cg11433622	-0.340802	0.289689	-11.8423	4.99019e-17	1.65535e-14	28.4858	0.46009	0.119288	-0.340802	2	66667549	R	I	MEIS1	Body	opensea	Body-opensea		NA	TRUE
cg26230651	-0.267944	0.281819	-11.8415	5.00441e-17	1.6587e-14	28.4829	0.415791	0.147847	-0.267944	2	114048973	R	I	LOC440839	Body	island	Body-island	chr2:114048828-114049055	NA	NA			rs58356313
cg12731773	-0.258202	0.649449	-11.8409	5.01408e-17	1.66053e-14	28.481	0.77855	0.520348	-0.258202	11	846055	R	II	TSPAN4	5'UTR	shelf	5'UTR-shelf	chr11:849087-850982	NA	TRUE			rs79688407
cg02286091	-0.373714	0.329191	-11.8368	5.08683e-17	1.68323e-14	28.4668	0.516048	0.142334	-0.373714	5	78407678	F	I	BHMT	5'UTR	opensea	5'UTR-opensea		NA	TRUE		rs1050824
cg02671826	-0.143423	0.872521	-11.8365	5.09138e-17	1.68334e-14	28.4659	0.944233	0.80081	-0.143423	6	157191263	R	II	ARID1B	Body	opensea	Body-opensea		NA	TRUE
cg13784312	0.370751	0.488295	11.8343	5.12967e-17	1.6946e-14	28.4584	0.302919	0.67367	0.370751	9	134609065	R	I	RAPGEF1	Body	opensea	Body-opensea		TRUE	NA
cg20825022	0.316289	0.649042	11.8334	5.14697e-17	1.69892e-14	28.4551	0.490898	0.807187	0.316289	2	124920645	R	II	CNTNAP5	Body	opensea	Body-opensea		NA	TRUE
cg00735218	-0.197938	0.778925	-11.8328	5.15703e-17	1.70084e-14	28.4532	0.877894	0.679956	-0.197938	17	76421569	R	II	DNAH17	Body	island	Body-island	chr17:76421441-76421766	NA	NA
cg06842954	-0.337279	0.327185	-11.8274	5.25331e-17	1.72915e-14	28.4349	0.495825	0.158545	-0.337279	4	111559066	R	I	PITX2	TSS1500	shore	TSS1500-shore	chr4:111560563-111560808	NA	NA
cg07883124	-0.229228	0.696689	-11.8273	5.25581e-17	1.72915e-14	28.4344	0.811304	0.582075	-0.229228	13	113634042	R	I	MCF2L	Body	island	Body-island	chr13:113633843-113634065	NA	NA
cg19921377	-0.187582	0.711504	-11.8267	5.26706e-17	1.73143e-14	28.4323	0.805295	0.617713	-0.187582	19	7580209	F	I	ZNF358	TSS1500	shore	TSS1500-shore	chr19:7580824-7581415	NA	NA
cg21936959	-0.21088	0.614815	-11.8242	5.31204e-17	1.74478e-14	28.4238	0.720255	0.509375	-0.21088	11	68782049	F	I	MRGPRF	TSS1500	shelf	TSS1500-shelf	chr11:68778569-68778851	NA	TRUE
cg15013801	0.323118	0.520482	11.8238	5.31964e-17	1.74585e-14	28.4224	0.358922	0.682041	0.323118	10	73976790	F	I	ASCC1	TSS1500	shore	TSS1500-shore	chr10:73975671-73976115	NA	NA
cg20058148	0.138394	0.22463	11.8187	5.41398e-17	1.7739e-14	28.405	0.155433	0.293827	0.138394	4	156298427	R	I	MAP9	TSS1500	shore	TSS1500-shore	chr4:156297601-156298094	NA	NA
cg05545808	-0.166669	0.815483	-11.8167	5.45288e-17	1.78519e-14	28.3979	0.898817	0.732148	-0.166669	16	81712102	F	II	CMIP	Body	island	Body-island	chr16:81711864-81712214	NA	NA
cg10424681	-0.231008	0.612623	-11.8133	5.51754e-17	1.80488e-14	28.3862	0.728127	0.49712	-0.231008	6	4079350	R	I	C6orf201	TSS200	island	TSS200-island	chr6:4079052-4079443	NA	TRUE
cg11171825	0.306653	0.39006	11.8129	5.52538e-17	1.80597e-14	28.3848	0.236734	0.543386	0.306653	6	42939029	F	II	PEX6	Body	opensea	Body-opensea		TRUE	TRUE
cg06552160	0.367792	0.662851	11.8104	5.57316e-17	1.81863e-14	28.3763	0.478955	0.846747	0.367792	2	1926724	R	II	MYT1L	Body	opensea	Body-opensea		NA	NA	low-CpG:1905605-1905922
cg08032924	-0.331643	0.3383	-11.8096	5.58851e-17	1.82146e-14	28.3736	0.504122	0.172478	-0.331643	16	66613096	R	I	CMTM2	TSS1500	island	TSS1500-island	chr16:66612749-66613412	NA	NA
cg19370653	-0.366823	0.276112	-11.8094	5.59095e-17	1.82146e-14	28.3732	0.459523	0.0927003	-0.366823	4	111550040	F	II	PITX2	Body	island	Body-island	chr4:111549879-111550203	NA	TRUE
cg05058758	-0.267901	0.344175	-11.8089	5.6022e-17	1.82365e-14	28.3712	0.478125	0.210224	-0.267901	2	143784246	R	I	KYNU	Body	opensea	Body-opensea		NA	TRUE
cg09624466	-0.436267	0.417592	-11.8076	5.6261e-17	1.82845e-14	28.3669	0.635726	0.199459	-0.436267	14	57278710	R	II	OTX2OS1	TSS1500	island	TSS1500-island	chr14:57278709-57279116	NA	NA
cg01090433	0.244567	0.282481	11.7985	5.8064e-17	1.87943e-14	28.3357	0.160197	0.404764	0.244567	16	82673506	F	II	CDH13	Body	opensea	Body-opensea		TRUE	TRUE
cg13352750	-0.328148	0.253359	-11.797	5.83751e-17	1.88798e-14	28.3304	0.417433	0.0892857	-0.328148	7	27225123	R	I	HOXA11AS	Body	island	Body-island	chr7:27225050-27225629	NA	NA			rs71757806
cg04868238	-0.201214	0.693655	-11.7943	5.89149e-17	1.9039e-14	28.3213	0.794262	0.593048	-0.201214	8	22501100	F	II	FLJ14107	TSS1500	opensea	TSS1500-opensea		NA	NA
cg24056954	-0.135275	0.895459	-11.7917	5.94429e-17	1.91941e-14	28.3124	0.963097	0.827822	-0.135275	11	67926217	R	II	SUV420H1	Body	opensea	Body-opensea		NA	NA
cg18161890	-0.327964	0.427962	-11.7909	5.96217e-17	1.92209e-14	28.3095	0.591944	0.26398	-0.327964	12	52995250	R	I	KRT72	1stExon	island	1stExon-island	chr12:52994772-52995312	NA	NA
cg24337215	0.405149	0.725766	11.7904	5.97151e-17	1.92355e-14	28.3079	0.523192	0.928341	0.405149	1	155881944	R	I	RIT1	TSS1500	opensea	TSS1500-opensea		NA	NA
cg04022560	-0.137668	0.878602	-11.7886	6.01028e-17	1.93293e-14	28.3015	0.947436	0.809767	-0.137668	1	10720269	R	II	CASZ1	Body	island	Body-island	chr1:10719867-10720581	NA	NA
cg10366797	-0.263893	0.650695	-11.7881	6.02036e-17	1.93462e-14	28.2999	0.782641	0.518749	-0.263893	12	54441509	F	II	HOXC4	5'UTR	island	5'UTR-island	chr12:54440642-54441543	NA	NA		rs80252816
cg16310491	-0.319374	0.414588	-11.7843	6.10042e-17	1.95721e-14	28.2868	0.574274	0.254901	-0.319374	5	87973597	R	II	LOC645323	Body	shore	Body-shore	chr5:87973951-87974294	NA	TRUE
cg23339656	0.287225	0.520725	11.7818	6.15185e-17	1.97122e-14	28.2785	0.377112	0.664337	0.287225	2	234159882	R	II	ATG16L1	TSS1500	shore	TSS1500-shore	chr2:234160100-234160735	NA	NA
cg08313880	0.161086	0.273726	11.7817	6.15394e-17	1.97122e-14	28.2781	0.193183	0.354269	0.161086	17	4643401	R	I	CXCL16	TSS200	island	TSS200-island	chr17:4642038-4643410	NA	NA
cg21953058	-0.292596	0.537071	-11.775	6.2998e-17	2.00991e-14	28.2549	0.68337	0.390773	-0.292596	15	41309253	R	II	INO80	Body	opensea	Body-opensea		NA	TRUE
cg19022006	0.354487	0.667497	11.7729	6.34613e-17	2.02148e-14	28.2477	0.490254	0.844741	0.354487	18	61143945	R	I	SERPINB5	TSS200	opensea	TSS200-opensea		NA	NA			rs57171297
cg23320499	-0.319782	0.444053	-11.7682	6.4493e-17	2.04861e-14	28.2317	0.603944	0.284161	-0.319782	12	12659177	R	II	DUSP16	Body	opensea	Body-opensea		TRUE	TRUE
cg10170214	-0.162659	0.823095	-11.768	6.45404e-17	2.04861e-14	28.2309	0.904425	0.741766	-0.162659	10	102765227	R	I	LZTS2	Body	island	Body-island	chr10:102765205-102765448	NA	NA
cg07661904	0.37677	0.643708	11.7662	6.49495e-17	2.05743e-14	28.2247	0.455323	0.832093	0.37677	10	71930999	R	I	SAR1A	TSS1500	shore	TSS1500-shore	chr10:71930007-71930587	NA	NA
cg10122865	-0.389839	0.345841	-11.7653	6.51517e-17	2.05965e-14	28.2216	0.54076	0.150921	-0.389839	2	63284132	F	I	OTX1	3'UTR	island	3'UTR-island	chr2:63283936-63284147	NA	TRUE
cg12611860	-0.0742407	0.914796	-11.7631	6.56523e-17	2.07151e-14	28.214	0.951917	0.877676	-0.0742407	11	17191617	R	II	PIK3C2A	TSS1500	opensea	TSS1500-opensea		NA	NA
cg17200137	-0.252129	0.70537	-11.7598	6.64024e-17	2.09188e-14	28.2028	0.831435	0.579306	-0.252129	10	48416896	F	II	GDF2	TSS200	shelf	TSS200-shelf	chr10:48413741-48413968	NA	NA		rs76241298
cg11199639	-0.297827	0.493873	-11.7576	6.69162e-17	2.10311e-14	28.1951	0.642787	0.34496	-0.297827	8	39172111	F	I	ADAM5P	TSS200	opensea	TSS200-opensea		NA	NA
cg03379681	-0.309931	0.516563	-11.7537	6.781e-17	2.12953e-14	28.182	0.671528	0.361597	-0.309931	3	151058527	F	II	P2RY12	1stExon	opensea	1stExon-opensea		NA	NA
cg12404831	-0.320818	0.50388	-11.7515	6.8342e-17	2.14287e-14	28.1743	0.664289	0.343471	-0.320818	2	192114017	F	II	MYO1B	5'UTR	shelf	5'UTR-shelf	chr2:192109828-192110940	NA	NA		rs72912411
cg24340081	-0.358138	0.4679	-11.75	6.86895e-17	2.15209e-14	28.1692	0.646969	0.288831	-0.358138	8	63614431	R	II	NKAIN3	Body	opensea	Body-opensea		NA	NA
cg15618978	-0.265615	0.369364	-11.749	6.89409e-17	2.15828e-14	28.1656	0.502171	0.236556	-0.265615	3	160167990	F	I	TRIM59	TSS1500	island	TSS1500-island	chr3:160167184-160168200	NA	NA
cg17774559	-0.428444	0.373959	-11.7484	6.90875e-17	2.16035e-14	28.1635	0.588181	0.159737	-0.428444	5	1879698	F	I	IRX4	Body	island	Body-island	chr5:1879689-1879928	NA	NA
cg24411961	-0.310301	0.533729	-11.7482	6.91148e-17	2.16035e-14	28.1631	0.68888	0.378579	-0.310301	1	34642396	R	I	C1orf94	5'UTR	island	5'UTR-island	chr1:34642382-34643024	NA	NA			rs34457758
cg19029181	-0.26983	0.46039	-11.7459	6.96815e-17	2.17467e-14	28.155	0.595305	0.325475	-0.26983	3	147130536	R	I	ZIC1	Body	island	Body-island	chr3:147130342-147130577	NA	NA
cg25389328	-0.265218	0.426828	-11.7448	6.99476e-17	2.18127e-14	28.1512	0.559437	0.294219	-0.265218	17	38222062	F	II	THRA	5'UTR	shelf	5'UTR-shelf	chr17:38219084-38219880	NA	NA
cg12378187	-0.316707	0.333224	-11.7429	7.04151e-17	2.19244e-14	28.1447	0.491577	0.17487	-0.316707	3	62355443	R	I	FEZF2	3'UTR	island	3'UTR-island	chr3:62355315-62355534	NA	NA
cg09341491	-0.201993	0.777637	-11.7408	7.09191e-17	2.20642e-14	28.1376	0.878634	0.676641	-0.201993	16	50707795	F	II	SNX20	Body	island	Body-island	chr16:50707291-50708041	NA	NA
cg11207652	-0.0815895	0.918116	-11.7374	7.1766e-17	2.2293e-14	28.1258	0.958911	0.877321	-0.0815895	4	24860210	F	II	CCDC149	Body	opensea	Body-opensea		NA	TRUE		rs17625018
cg03221073	0.36746	0.714261	11.7351	7.23292e-17	2.24506e-14	28.1181	0.530531	0.897991	0.36746	1	186157555	R	II	HMCN1	Body	opensea	Body-opensea		NA	TRUE
cg24933605	0.119171	0.142576	11.7316	7.32192e-17	2.26917e-14	28.106	0.082991	0.202162	0.119171	2	216177085	R	I	ATIC	Body	island	Body-island	chr2:216176549-216177132	NA	NA
cg00637687	-0.246202	0.267327	-11.7286	7.39775e-17	2.28913e-14	28.0958	0.390428	0.144226	-0.246202	5	95768915	F	I	PCSK1	1stExon	island	1stExon-island	chr5:95768874-95769080	NA	NA
cg01796223	0.284875	0.642392	11.7273	7.43265e-17	2.29815e-14	28.0911	0.499955	0.784829	0.284875	7	129933014	R	II	CPA4	1stExon	opensea	1stExon-opensea		TRUE	TRUE
cg08493294	-0.373298	0.443918	-11.727	7.44015e-17	2.2987e-14	28.0901	0.630566	0.257269	-0.373298	2	25500416	F	II	DNMT3A	Body	island	Body-island	chr2:25499763-25500429	TRUE	NA
cg06634950	0.248558	0.292704	11.7262	7.46026e-17	2.30313e-14	28.0874	0.168425	0.416983	0.248558	3	169487146	R	II	ARPM1	1stExon	island	1stExon-island	chr3:169487145-169487522	TRUE	NA
cg15748507	-0.292351	0.470981	-11.7251	7.48886e-17	2.31018e-14	28.0836	0.617156	0.324805	-0.292351	10	120354627	R	II	PRLHR	Body	island	Body-island	chr10:120353692-120355821	NA	TRUE
cg07811198	-0.336612	0.411878	-11.7237	7.52515e-17	2.31959e-14	28.0788	0.580184	0.243572	-0.336612	7	153585368	F	II	DPP6	Body	island	Body-island	chr7:153583317-153585666	NA	NA
cg15540820	-0.35613	0.348603	-11.7207	7.60549e-17	2.34256e-14	28.0683	0.526668	0.170538	-0.35613	3	27765283	F	II	EOMES	TSS1500	island	TSS1500-island	chr3:27765196-27765675	NA	NA		rs72537449
cg11303839	0.441415	0.520892	11.7157	7.73754e-17	2.37957e-14	28.0513	0.300185	0.7416	0.441415	7	75405967	F	II	CCL26	5'UTR	opensea	5'UTR-opensea		NA	NA
cg22598885	-0.172292	0.713702	-11.7135	7.79655e-17	2.39404e-14	28.0437	0.799848	0.627556	-0.172292	8	38175609	R	I	WHSC1L1	Body	opensea	Body-opensea		NA	NA
cg09151754	-0.271678	0.48582	-11.7126	7.82087e-17	2.39967e-14	28.0407	0.621659	0.349981	-0.271678	17	5019310	R	II	ZNF232	5'UTR	island	5'UTR-island	chr17:5019050-5019551	NA	NA
cg19780563	-0.105673	0.891438	-11.7103	7.88537e-17	2.41761e-14	28.0325	0.944275	0.838601	-0.105673	10	94594494	F	II	EXOC6	5'UTR	opensea	5'UTR-opensea		NA	NA			rs77134517
cg13713922	-0.393266	0.40483	-11.7098	7.89781e-17	2.41957e-14	28.031	0.601464	0.208197	-0.393266	2	121625577	R	II	GLI2	Body	shore	Body-shore	chr2:121624827-121625209	TRUE	TRUE
cg18797590	0.251554	0.401964	11.7091	7.91607e-17	2.42331e-14	28.0287	0.276187	0.527741	0.251554	4	15480643	R	II	CC2D2A	Body	opensea	Body-opensea		TRUE	TRUE
cg24342696	-0.126648	0.86041	-11.7075	7.96194e-17	2.4355e-14	28.0229	0.923734	0.797086	-0.126648	1	39617089	F	II	MACF1	Body	opensea	Body-opensea		NA	TRUE		rs34934622
cg26521404	-0.383044	0.272013	-11.7058	8.00776e-17	2.4454e-14	28.0173	0.463535	0.0804909	-0.383044	7	27204981	F	I	HOXA9	1stExon	island	1stExon-island	chr7:27203915-27206462	NA	NA		rs11975265
cg01295399	-0.196974	0.489353	-11.7057	8.01126e-17	2.4454e-14	28.0168	0.58784	0.390866	-0.196974	10	50820278	R	I	SLC18A3	1stExon	island	1stExon-island	chr10:50817601-50820356	NA	TRUE
cg23683588	-0.316361	0.312398	-11.7057	8.01262e-17	2.4454e-14	28.0167	0.470579	0.154218	-0.316361	14	37136283	F	I	PAX9	Body	island	Body-island	chr14:37135513-37136348	NA	NA
cg23759189	0.333204	0.663511	11.705	8.02984e-17	2.44879e-14	28.0145	0.496909	0.830114	0.333204	11	131410868	R	II	NTM	Body	opensea	Body-opensea		NA	NA
cg13382100	0.159236	0.174665	11.7033	8.07803e-17	2.46161e-14	28.0086	0.0950467	0.254282	0.159236	12	132414849	R	II	PUS1	Body	shore	Body-shore	chr12:132413338-132414801	NA	NA
cg06910100	-0.14734	0.80111	-11.7024	8.10264e-17	2.46724e-14	28.0056	0.87478	0.72744	-0.14734	19	17375091	F	II	USHBP1	Body	opensea	Body-opensea		NA	NA
cg18080509	-0.2167	0.686368	-11.7012	8.13795e-17	2.47423e-14	28.0013	0.794717	0.578018	-0.2167	6	74009455	F	II	C6orf147	Body	island	Body-island	chr6:74008820-74009456	NA	TRUE
cg01266985	-0.183042	0.750008	-11.6985	8.21401e-17	2.49546e-14	27.9921	0.841529	0.658487	-0.183042	5	1092066	F	II	SLC12A7	Body	shore	Body-shore	chr5:1093579-1093837	NA	NA
cg21747271	0.3254	0.423199	11.6959	8.29014e-17	2.51252e-14	27.9829	0.260499	0.585899	0.3254	11	67250052	R	II	AIP	TSS1500	shore	TSS1500-shore	chr11:67250344-67250864	NA	NA
cg22694818	-0.301752	0.39105	-11.6916	8.41432e-17	2.54666e-14	27.9682	0.541926	0.240174	-0.301752	1	75595970	F	I	LHX8	5'UTR	island	5'UTR-island	chr1:75595813-75596162	NA	TRUE			rs41289230
cg19324997	0.361773	0.775831	11.6899	8.46206e-17	2.55532e-14	27.9626	0.594944	0.956717	0.361773	2	240169161	R	I	HDAC4	Body	opensea	Body-opensea		NA	NA
cg00575896	-0.208774	0.665949	-11.687	8.54819e-17	2.57938e-14	27.9526	0.770336	0.561562	-0.208774	3	50357171	F	II	HYAL2	Body	shore	Body-shore	chr3:50357453-50357683	NA	TRUE
cg08473330	-0.297971	0.494567	-11.685	8.60779e-17	2.59541e-14	27.9457	0.643553	0.345581	-0.297971	2	63282883	F	II	OTX1	Body	island	Body-island	chr2:63282514-63283122	NA	TRUE
cg00781795	-0.215691	0.749493	-11.6834	8.65841e-17	2.60871e-14	27.9399	0.857339	0.641647	-0.215691	18	55815677	F	II	NEDD4L	5'UTR	opensea	5'UTR-opensea		NA	NA
cg09476997	-0.241985	0.715349	-11.6816	8.71201e-17	2.62289e-14	27.9338	0.836341	0.594356	-0.241985	16	2087932	F	I	SLC9A3R2	Body	shore	Body-shore	chr16:2088753-2088998	NA	NA
cg21650861	-0.17167	0.725639	-11.6795	8.77427e-17	2.63569e-14	27.9267	0.811474	0.639804	-0.17167	3	127299468	R	II	TPRA1	5'UTR	opensea	5'UTR-opensea		NA	NA
cg24324628	-0.280191	0.72021	-11.6784	8.80864e-17	2.64404e-14	27.9228	0.860305	0.580115	-0.280191	6	138866882	F	II	NHSL1	Body	opensea	Body-opensea		NA	TRUE	low-CpG:138908496-138908826
cg13692222	-0.131531	0.879179	-11.6776	8.83421e-17	2.64973e-14	27.92	0.944945	0.813414	-0.131531	14	105683925	F	I	BRF1	Body	shore	Body-shore	chr14:105684955-105685159	NA	NA
cg20108872	-0.173947	0.83445	-11.6762	8.87754e-17	2.66073e-14	27.9151	0.921424	0.747477	-0.173947	7	127595297	R	II	SND1	Body	opensea	Body-opensea		NA	TRUE
cg17032848	-0.150615	0.829954	-11.6692	9.09506e-17	2.71982e-14	27.8911	0.905261	0.754646	-0.150615	2	238647755	R	II	LRRFIP1	Body	shelf	Body-shelf	chr2:238643905-238644109	NA	NA
cg14741939	-0.382512	0.338089	-11.6665	9.18001e-17	2.7391e-14	27.8819	0.529345	0.146833	-0.382512	3	147127137	F	II	ZIC1	TSS200	island	TSS200-island	chr3:147126988-147128999	TRUE	NA
cg05999364	0.283595	0.499052	11.6643	9.25072e-17	2.75609e-14	27.8743	0.357255	0.64085	0.283595	8	3269952	F	II	CSMD1	Body	opensea	Body-opensea		NA	NA		rs73657846
cg16478977	-0.205178	0.755024	-11.6628	9.29882e-17	2.76631e-14	27.8692	0.857612	0.652435	-0.205178	14	77689345	R	II	TMEM63C	Body	opensea	Body-opensea		NA	TRUE
cg17927313	-0.186383	0.73371	-11.6611	9.35451e-17	2.77875e-14	27.8633	0.826901	0.640518	-0.186383	15	65151592	R	II	PLEKHO2	Body	opensea	Body-opensea		NA	TRUE
cg00017489	-0.34685	0.427207	-11.66	9.39032e-17	2.78732e-14	27.8595	0.600632	0.253782	-0.34685	7	153583318	R	II	DPP6	TSS1500	island	TSS1500-island	chr7:153583317-153585666	NA	NA
cg03900143	-0.373354	0.306008	-11.6589	9.42704e-17	2.79615e-14	27.8556	0.492685	0.11933	-0.373354	3	147111660	F	I	ZIC4	Body	island	Body-island	chr3:147108511-147111703	TRUE	NA		rs16859414
cg00396667	-0.358482	0.324263	-11.6584	9.44429e-17	2.79712e-14	27.8538	0.503504	0.145022	-0.358482	5	134364387	R	I	PITX1	3'UTR	island	3'UTR-island	chr5:134363092-134365146	NA	NA
cg24887265	-0.387222	0.381523	-11.6555	9.53889e-17	2.8214e-14	27.8439	0.575134	0.187912	-0.387222	2	45233528	R	I	SIX2	Body	shore	Body-shore	chr2:45235511-45237792	NA	NA
cg11028923	0.189894	0.205453	11.6549	9.55873e-17	2.82475e-14	27.8419	0.110506	0.3004	0.189894	5	43557644	R	II	PAIP1	TSS1500	shore	TSS1500-shore	chr5:43556419-43557603	NA	NA
cg07211472	-0.19398	0.580839	-11.6541	9.58514e-17	2.83047e-14	27.8391	0.677829	0.483849	-0.19398	7	4304846	R	I	SDK1	Body	island	Body-island	chr7:4303079-4305062	NA	NA
cg16425726	-0.166739	0.823443	-11.6477	9.8008e-17	2.88777e-14	27.8171	0.906812	0.740074	-0.166739	4	83680145	F	I	SCD5	Body	opensea	Body-opensea		NA	NA
cg00335591	0.30581	0.517337	11.6443	9.91689e-17	2.91983e-14	27.8054	0.364432	0.670242	0.30581	7	1596260	R	I	TMEM184A	TSS200	opensea	TSS200-opensea		NA	NA
cg21170796	-0.336492	0.480658	-11.6417	1.00096e-16	2.94497e-14	27.7962	0.648904	0.312411	-0.336492	1	119528164	F	II	TBX15	5'UTR	shore	5'UTR-shore	chr1:119529819-119530712	NA	NA
cg09558195	-0.294695	0.227891	-11.6407	1.0045e-16	2.95105e-14	27.7927	0.375239	0.0805441	-0.294695	6	146350585	R	I	GRM1	5'UTR	island	5'UTR-island	chr6:146350522-146350780	NA	NA
cg10660256	-0.367722	0.404166	-11.6396	1.00805e-16	2.95714e-14	27.7892	0.588027	0.220305	-0.367722	5	78407683	F	II	BHMT	5'UTR	opensea	5'UTR-opensea		NA	TRUE		rs1050824
cg19659741	-0.303253	0.50238	-11.6389	1.01058e-16	2.96238e-14	27.7867	0.654007	0.350754	-0.303253	8	39172099	F	I	ADAM5P	TSS200	opensea	TSS200-opensea		NA	NA
cg25651783	-0.325758	0.279564	-11.6381	1.01352e-16	2.96884e-14	27.7838	0.442443	0.116686	-0.325758	1	155265033	F	II	PKLR	Body	island	Body-island	chr1:155264318-155265536	NA	NA
cg02342906	-0.167838	0.747158	-11.6371	1.01686e-16	2.97644e-14	27.7806	0.831077	0.663239	-0.167838	1	10733858	R	I	CASZ1	Body	opensea	Body-opensea		NA	NA
cg27185978	-0.297247	0.560347	-11.6306	1.04028e-16	3.03613e-14	27.758	0.708971	0.411724	-0.297247	8	25095288	R	II	DOCK5	Body	opensea	Body-opensea		NA	TRUE
cg25588852	0.211628	0.232711	11.6291	1.04561e-16	3.04947e-14	27.753	0.126897	0.338526	0.211628	2	216877276	R	II	MREG	Body	shore	Body-shore	chr2:216877899-216878352	NA	NA		rs3836042
cg19134568	-0.312599	0.430229	-11.6285	1.04778e-16	3.05305e-14	27.7509	0.586528	0.27393	-0.312599	4	147561339	R	II	POU4F2	Body	island	Body-island	chr4:147559205-147561901	NA	TRUE
cg19726128	-0.129374	0.832407	-11.6284	1.04836e-16	3.05305e-14	27.7504	0.897094	0.76772	-0.129374	14	69564942	R	II	DCAF5	Body	opensea	Body-opensea		NA	TRUE
cg14331619	-0.151288	0.818035	-11.6182	1.08633e-16	3.15673e-14	27.7151	0.893679	0.742391	-0.151288	9	35909996	R	II	LOC158376	Body	opensea	Body-opensea		NA	TRUE
cg08393041	-0.391119	0.399005	-11.6167	1.09178e-16	3.17028e-14	27.7102	0.594564	0.203445	-0.391119	3	147109426	F	II	ZIC4	Body	island	Body-island	chr3:147108511-147111703	NA	NA		rs16859411
cg03635766	-0.264705	0.70377	-11.6161	1.09439e-16	3.17469e-14	27.7078	0.836122	0.571417	-0.264705	17	38607865	F	II	IGFBP4	Body	opensea	Body-opensea		TRUE	TRUE
cg19678828	-0.35817	0.344659	-11.6159	1.09489e-16	3.17469e-14	27.7073	0.523744	0.165574	-0.35817	21	27945413	R	II	CYYR1	5'UTR	island	5'UTR-island	chr21:27945010-27945646	NA	NA
cg24496614	0.224863	0.315469	11.6137	1.10342e-16	3.18559e-14	27.6997	0.203038	0.427901	0.224863	11	61735970	F	II	FTH1	TSS1500	shore	TSS1500-shore	chr11:61734760-61735932	NA	NA
cg05128414	-0.373968	0.314389	-11.607	1.12962e-16	3.25187e-14	27.6764	0.501373	0.127405	-0.373968	1	197882836	F	II	LHX9	Body	shore	Body-shore	chr1:197880016-197881637	NA	NA
cg21783847	0.190733	0.252357	11.6064	1.1318e-16	3.2558e-14	27.6745	0.156991	0.347724	0.190733	1	167522422	F	II	CREG1	Body	shore	Body-shore	chr1:167522469-167523070	NA	NA		rs75417177
cg05016408	-0.370642	0.380541	-11.6049	1.1377e-16	3.2691e-14	27.6693	0.565862	0.19522	-0.370642	5	150326174	R	I	LOC134466	TSS200	island	TSS200-island	chr5:150325904-150326194	NA	NA
cg18175809	-0.361689	0.37576	-11.6047	1.13865e-16	3.2691e-14	27.6685	0.556604	0.194915	-0.361689	3	62355525	F	II	FEZF2	3'UTR	island	3'UTR-island	chr3:62355315-62355534	NA	NA
cg08682723	-0.202819	0.711227	-11.6046	1.13887e-16	3.2691e-14	27.6683	0.812636	0.609817	-0.202819	16	81713770	R	I	CMIP	Body	shore	Body-shore	chr16:81711864-81712214	NA	NA
cg16186001	-0.0982959	0.892021	-11.6041	1.14084e-16	3.27242e-14	27.6666	0.941169	0.842873	-0.0982959	5	159448398	F	II	TTC1	Body	opensea	Body-opensea		NA	TRUE
cg06469345	-0.260311	0.22822	-11.6006	1.15509e-16	3.31093e-14	27.6543	0.358376	0.0980645	-0.260311	4	9783246	F	I	DRD5	TSS200	island	TSS200-island	chr4:9783035-9784960	NA	NA
cg17701921	-0.157621	0.85736	-11.5972	1.16865e-16	3.345e-14	27.6427	0.936171	0.778549	-0.157621	19	537170	R	I	CDC34	Body	shore	Body-shore	chr19:539082-539534	NA	NA
cg26816907	-0.227837	0.496033	-11.5949	1.17823e-16	3.3677e-14	27.6347	0.609952	0.382115	-0.227837	1	197890812	R	I	LHX9	Body	island	Body-island	chr1:197890478-197890824	NA	NA			rs13376365
cg00869668	-0.210651	0.525651	-11.5948	1.17845e-16	3.3677e-14	27.6345	0.630976	0.420325	-0.210651	17	1549012	R	I	SCARF1	5'UTR	shore	5'UTR-shore	chr17:1546742-1547324	NA	NA
cg21385480	-0.23912	0.74462	-11.5947	1.1791e-16	3.3677e-14	27.6339	0.86418	0.62506	-0.23912	3	66454763	R	I	LRIG1	Body	opensea	Body-opensea		NA	TRUE
cg00715197	0.274102	0.777728	11.5926	1.18759e-16	3.38953e-14	27.6268	0.640677	0.914779	0.274102	14	68604594	F	II	RAD51L1	Body	opensea	Body-opensea		TRUE	TRUE
cg02017282	-0.3719	0.289128	-11.5922	1.18934e-16	3.39211e-14	27.6254	0.475079	0.103178	-0.3719	17	44896923	R	II	WNT3	TSS1500	island	TSS1500-island	chr17:44895800-44897025	TRUE	TRUE
cg05171197	-0.205187	0.68093	-11.592	1.19033e-16	3.39251e-14	27.6245	0.783523	0.578337	-0.205187	2	240230850	F	I	HDAC4	Body	opensea	Body-opensea		TRUE	TRUE
cg25865120	0.309035	0.546962	11.5908	1.19494e-16	3.39876e-14	27.6207	0.392445	0.70148	0.309035	15	48625058	R	II	DUT	Body	shore	Body-shore	chr15:48623185-48624651	NA	NA
cg17367472	0.26631	0.717574	11.589	1.20252e-16	3.41753e-14	27.6144	0.584419	0.85073	0.26631	21	32254161	R	II	KRTAP11-1	TSS1500	opensea	TSS1500-opensea		NA	NA
cg07850987	-0.383985	0.45872	-11.5815	1.23464e-16	3.50633e-14	27.5883	0.650713	0.266728	-0.383985	17	46645972	R	II	HOXB3	5'UTR	shelf	5'UTR-shelf	chr17:46641534-46642110	NA	NA
cg11326574	0.245194	0.320008	11.5788	1.24601e-16	3.53613e-14	27.5792	0.197411	0.442605	0.245194	12	59271109	R	II	LRIG3	Body	opensea	Body-opensea		TRUE	TRUE
cg17124583	-0.273037	0.34593	-11.5782	1.24873e-16	3.54132e-14	27.5771	0.482449	0.209412	-0.273037	10	8097641	R	I	GATA3	Body	island	Body-island	chr10:8091374-8098329	NA	NA
cg09786257	-0.252172	0.357506	-11.5771	1.25362e-16	3.54326e-14	27.5732	0.483592	0.23142	-0.252172	5	95768695	R	II	PCSK1	1stExon	shore	1stExon-shore	chr5:95768874-95769080	NA	NA
cg02926033	0.302366	0.681226	11.577	1.25387e-16	3.54326e-14	27.573	0.530043	0.832409	0.302366	7	154540580	F	II	DPP6	Body	shore	Body-shore	chr7:154542059-154542348	NA	NA
cg21793127	-0.159745	0.816246	-11.5769	1.25472e-16	3.54326e-14	27.5723	0.896119	0.736374	-0.159745	17	73506038	R	II	CASKIN2	Body	opensea	Body-opensea		NA	NA
cg16419054	-0.152818	0.763007	-11.5766	1.25598e-16	3.54434e-14	27.5713	0.839416	0.686598	-0.152818	14	105804208	R	II	PACS2	Body	opensea	Body-opensea		NA	TRUE
cg20967139	0.190195	0.232942	11.5733	1.27027e-16	3.5796e-14	27.5601	0.137845	0.328039	0.190195	12	54785055	R	I	ZNF385A	5'UTR	island	5'UTR-island	chr12:54784900-54785238	TRUE	NA	high-CpG:53071285-53071425
cg12706330	0.354764	0.732463	11.5644	1.31045e-16	3.68298e-14	27.5293	0.555081	0.909845	0.354764	10	85898700	F	II	GHITM	TSS1500	shore	TSS1500-shore	chr10:85899058-85899640	NA	NA
cg25344265	0.30147	0.761535	11.5644	1.31063e-16	3.68298e-14	27.5291	0.6108	0.91227	0.30147	5	38273388	R	II	EGFLAM	Body	opensea	Body-opensea		NA	NA
cg13891220	-0.279859	0.481676	-11.5638	1.31309e-16	3.68633e-14	27.5273	0.621606	0.341747	-0.279859	4	111549953	F	II	PITX2	Body	island	Body-island	chr4:111549879-111550203	NA	TRUE			rs80199976
cg06023994	-0.29197	0.603691	-11.5616	1.32352e-16	3.7088e-14	27.5194	0.749676	0.457706	-0.29197	3	170137871	F	II	CLDN11	Body	island	Body-island	chr3:170136242-170137886	TRUE	NA
cg02578944	-0.216286	0.734687	-11.5603	1.32955e-16	3.71833e-14	27.5149	0.84283	0.626544	-0.216286	6	28227392	F	I	NKAPL	1stExon	island	1stExon-island	chr6:28226979-28227483	NA	NA		rs12000	rs73402526
cg12260990	-0.131327	0.839903	-11.5594	1.33371e-16	3.72694e-14	27.5118	0.905566	0.774239	-0.131327	22	47371122	R	I	TBC1D22A	Body	shore	Body-shore	chr22:47370112-47370343	NA	NA
cg06550984	-0.332573	0.365405	-11.5588	1.33647e-16	3.73205e-14	27.5098	0.531692	0.199119	-0.332573	10	23480002	R	II	PTF1A	TSS1500	shore	TSS1500-shore	chr10:23480697-23482455	NA	NA
cg26099134	-0.222928	0.364948	-11.5581	1.33984e-16	3.73885e-14	27.5073	0.476413	0.253484	-0.222928	6	100897309	F	I	SIM1	Body	island	Body-island	chr6:100897080-100897621	NA	NA
cg15226029	-0.148482	0.806615	-11.5566	1.34685e-16	3.7558e-14	27.5021	0.880857	0.732374	-0.148482	6	32151731	F	II	AGER	Body	opensea	Body-opensea		NA	NA			rs17846804
cg15701111	-0.220418	0.757776	-11.5559	1.34994e-16	3.76176e-14	27.4999	0.867985	0.647567	-0.220418	12	52685334	R	II	KRT81	TSS200	shore	TSS200-shore	chr12:52684945-52685222	NA	NA
cg11392550	-0.16546	0.819778	-11.5555	1.35191e-16	3.76176e-14	27.4984	0.902508	0.737048	-0.16546	1	3157321	F	II	PRDM16	Body	shore	Body-shore	chr1:3157509-3158300	NA	NA
cg20524128	0.105579	0.147001	11.5532	1.36294e-16	3.78749e-14	27.4904	0.0942119	0.199791	0.105579	17	77965982	F	I	TBC1D16	Body	island	Body-island	chr17:77965805-77966296	NA	TRUE
cg06772221	0.315868	0.605328	11.5509	1.37391e-16	3.81534e-14	27.4824	0.447394	0.763262	0.315868	8	134062192	R	II	SLA	Body	opensea	Body-opensea		TRUE	TRUE
cg20348858	-0.298484	0.341068	-11.5473	1.39094e-16	3.85728e-14	27.4702	0.49031	0.191826	-0.298484	10	119305335	R	II	EMX2	Body	island	Body-island	chr10:119301321-119305368	NA	NA
cg26931862	-0.306884	0.271113	-11.5467	1.39397e-16	3.86036e-14	27.4681	0.424555	0.117671	-0.306884	12	54349169	F	I	HOXC12	1stExon	island	1stExon-island	chr12:54348695-54349378	NA	NA		rs34957565
cg18184910	0.273932	0.706109	11.5467	1.39398e-16	3.86036e-14	27.468	0.569143	0.843075	0.273932	6	47624247	R	II	GPR111	TSS200	opensea	TSS200-opensea		NA	NA			rs1485784
cg21077957	0.249072	0.658297	11.5461	1.39694e-16	3.86321e-14	27.4659	0.533761	0.782833	0.249072	8	142505227	F	II	FLJ43860	Body	opensea	Body-opensea		NA	NA		rs2748405
cg08455275	0.144896	0.139623	11.5435	1.40987e-16	3.8936e-14	27.4568	0.0671745	0.212071	0.144896	8	145047979	F	I	PLEC1	Body	island	Body-island	chr8:145047293-145052305	TRUE	NA
cg09523275	-0.309428	0.493969	-11.5418	1.41821e-16	3.91395e-14	27.451	0.648683	0.339255	-0.309428	6	28227093	F	II	NKAPL	TSS200	island	TSS200-island	chr6:28226979-28227483	NA	NA	high-CpG:28335047-28335084
cg21487856	-0.235996	0.656391	-11.5391	1.43157e-16	3.94538e-14	27.4417	0.774389	0.538392	-0.235996	2	54828502	R	II	SPTBN1	Body	opensea	Body-opensea		NA	TRUE
cg05477514	-0.246459	0.280496	-11.5365	1.44439e-16	3.97796e-14	27.4328	0.403726	0.157267	-0.246459	8	23564008	R	I	NKX2-6	TSS200	island	TSS200-island	chr8:23562475-23565175	NA	TRUE
cg03680338	-0.192287	0.547735	-11.5361	1.4467e-16	3.9816e-14	27.4313	0.643878	0.451591	-0.192287	6	22043967	F	I	FLJ22536	Body	opensea	Body-opensea		NA	TRUE
cg00050496	0.231879	0.325101	11.5346	1.454e-16	3.99887e-14	27.4263	0.209161	0.44104	0.231879	12	110211701	R	II	MGC14436	TSS1500	opensea	TSS1500-opensea		NA	NA
cg24084836	0.287312	0.655851	11.5343	1.45574e-16	3.99887e-14	27.4251	0.512195	0.799507	0.287312	14	77767735	R	II	POMT2	Body	opensea	Body-opensea		TRUE	NA			rs2287394
cg12325536	-0.254631	0.340025	-11.5343	1.45597e-16	3.99887e-14	27.4249	0.467341	0.212709	-0.254631	5	87968658	R	I	LOC645323	Body	island	Body-island	chr5:87968635-87968907	NA	NA
cg08886711	-0.245653	0.424012	-11.5338	1.45822e-16	4.00193e-14	27.4234	0.546838	0.301185	-0.245653	12	48399180	R	I	COL2A1	TSS1500	island	TSS1500-island	chr12:48399168-48399372	NA	NA
cg19069882	0.18851	0.167516	11.5336	1.45908e-16	4.00193e-14	27.4228	0.0732604	0.261771	0.18851	11	118123243	F	II	MPZL3	TSS1500	opensea	TSS1500-opensea		TRUE	NA
cg26444528	-0.339904	0.331767	-11.5298	1.47862e-16	4.04997e-14	27.4096	0.501719	0.161815	-0.339904	13	58207859	R	I	PCDH17	1stExon	island	1stExon-island	chr13:58206526-58208930	NA	NA	high-CpG:57105859-57105866
cg03572260	-0.194147	0.779601	-11.5214	1.52288e-16	4.15983e-14	27.3804	0.876675	0.682528	-0.194147	17	37808339	R	II	STARD3	5'UTR	opensea	5'UTR-opensea		NA	NA
cg11014794	0.241328	0.326674	11.5182	1.53998e-16	4.20367e-14	27.3693	0.20601	0.447338	0.241328	10	93999688	F	II	CPEB3	Body	island	Body-island	chr10:93999131-94000015	TRUE	NA
cg26299169	-0.338991	0.27923	-11.5167	1.5484e-16	4.22377e-14	27.3639	0.448725	0.109734	-0.338991	13	28498956	F	I	PDX1	3'UTR	island	3'UTR-island	chr13:28498226-28499046	NA	NA
cg03184472	0.32208	0.774805	11.5159	1.55274e-16	4.23275e-14	27.3612	0.613765	0.935845	0.32208	2	39174738	R	II	LOC100271715	Body	opensea	Body-opensea		TRUE	TRUE
cg12910906	-0.281016	0.385017	-11.5152	1.55649e-16	4.24008e-14	27.3588	0.525525	0.244509	-0.281016	2	131673894	F	II	ARHGEF4	TSS1500	island	TSS1500-island	chr2:131673686-131674150	NA	NA
cg07301795	-0.271791	0.477938	-11.5148	1.55824e-16	4.24197e-14	27.3577	0.613833	0.342042	-0.271791	5	157001698	R	II	ADAM19	Body	island	Body-island	chr5:157001468-157001756	NA	NA
cg13470063	-0.196983	0.771845	-11.5126	1.57062e-16	4.26695e-14	27.3498	0.870337	0.673354	-0.196983	1	43766206	R	II	TIE1	TSS1500	opensea	TSS1500-opensea		NA	TRUE
cg13280041	-0.273164	0.53477	-11.5091	1.59005e-16	4.31682e-14	27.3376	0.671352	0.398187	-0.273164	6	138866865	F	I	NHSL1	Body	opensea	Body-opensea		NA	TRUE	low-CpG:138908496-138908826
cg11142389	-0.343362	0.452767	-11.5059	1.6078e-16	4.36205e-14	27.3266	0.624448	0.281086	-0.343362	3	147125765	F	II	ZIC4	TSS1500	shore	TSS1500-shore	chr3:147126988-147128999	NA	TRUE
cg06704466	-0.143765	0.873376	-11.503	1.62425e-16	4.39776e-14	27.3166	0.945258	0.801493	-0.143765	2	237010257	R	I	AGAP1	Body	island	Body-island	chr2:237010218-237010450	NA	NA
cg11697169	-0.160979	0.815914	-11.5014	1.63315e-16	4.41886e-14	27.3111	0.896404	0.735425	-0.160979	8	27457461	R	II	CLU	Body	opensea	Body-opensea		NA	NA
cg16823083	-0.341477	0.31494	-11.5009	1.63625e-16	4.42427e-14	27.3093	0.485679	0.144202	-0.341477	1	3567412	F	I	WDR8	TSS1500	island	TSS1500-island	chr1:3566445-3569636	NA	NA
cg09043518	0.369143	0.653317	11.5002	1.64018e-16	4.43191e-14	27.3069	0.468746	0.837888	0.369143	17	80290106	R	II	SECTM1	5'UTR	shore	5'UTR-shore	chr17:80291020-80292394	NA	NA
cg08136772	-0.285342	0.34238	-11.4969	1.65894e-16	4.47628e-14	27.2956	0.485051	0.199709	-0.285342	13	53420933	R	I	PCDH8	1stExon	island	1stExon-island	chr13:53419897-53422872	TRUE	NA
cg18105139	-0.206595	0.487114	-11.4968	1.65996e-16	4.47628e-14	27.295	0.590412	0.383817	-0.206595	6	28058856	F	I	ZSCAN12L1	TSS200	opensea	TSS200-opensea		NA	NA
cg19555331	-0.307199	0.25967	-11.4917	1.68973e-16	4.55044e-14	27.2774	0.41327	0.10607	-0.307199	4	147561900	F	II	POU4F2	Body	island	Body-island	chr4:147559205-147561901	NA	TRUE
cg14401320	-0.103516	0.869542	-11.4906	1.69595e-16	4.56414e-14	27.2738	0.9213	0.817784	-0.103516	14	105796811	R	II	PACS2	Body	shore	Body-shore	chr14:105796420-105796749	TRUE	NA
cg27320005	-0.175555	0.739965	-11.4902	1.69834e-16	4.56751e-14	27.2724	0.827743	0.652188	-0.175555	5	140683767	F	I	SLC25A2	TSS200	island	TSS200-island	chr5:140683195-140683773	NA	NA
cg20945085	-0.243071	0.570859	-11.4897	1.70177e-16	4.5706e-14	27.2704	0.692395	0.449324	-0.243071	2	74875227	R	I	C2orf65	TSS200	island	TSS200-island	chr2:74875128-74875562	NA	NA
cg02379560	0.215323	0.272296	11.4891	1.70503e-16	4.57627e-14	27.2685	0.164635	0.379958	0.215323	4	40859280	F	I	APBB2	Body	shore	Body-shore	chr4:40858884-40859162	TRUE	TRUE
cg14412967	-0.12477	0.875622	-11.4887	1.70725e-16	4.57917e-14	27.2672	0.938007	0.813237	-0.12477	7	51096971	R	II	COBL	Body	opensea	Body-opensea		NA	TRUE
cg08113628	-0.190527	0.806954	-11.4882	1.71055e-16	4.58495e-14	27.2653	0.902217	0.711691	-0.190527	1	182570870	F	II	RGS16	Body	shelf	Body-shelf	chr1:182573375-182573760	TRUE	NA
cg20975682	-0.180854	0.73218	-11.4836	1.73846e-16	4.65664e-14	27.2492	0.822607	0.641753	-0.180854	12	50019676	F	II	PRPF40B	5'UTR	shelf	5'UTR-shelf	chr12:50016973-50017466	NA	NA		rs12582420
cg21052656	0.331737	0.453751	11.4829	1.74283e-16	4.66522e-14	27.2467	0.287882	0.619619	0.331737	11	67250046	R	II	AIP	TSS1500	shore	TSS1500-shore	chr11:67250344-67250864	NA	NA
cg20273260	0.260908	0.452404	11.4821	1.74756e-16	4.67476e-14	27.244	0.32195	0.582858	0.260908	2	133429169	F	II	LYPD1	TSS1500	shore	TSS1500-shore	chr2:133426652-133428870	TRUE	NA			rs73955784
cg12483545	-0.38837	0.603797	-11.4784	1.77041e-16	4.73273e-14	27.2312	0.797982	0.409612	-0.38837	1	2198879	R	I	SKI	Body	opensea	Body-opensea		NA	NA
cg00536792	-0.253882	0.683244	-11.476	1.78534e-16	4.76947e-14	27.2229	0.810185	0.556303	-0.253882	6	53530503	F	II	KLHL31	1stExon	opensea	1stExon-opensea		NA	NA
cg19516340	0.168967	0.233017	11.4716	1.81311e-16	4.83076e-14	27.2076	0.148533	0.3175	0.168967	2	10263696	R	I	RRM2	Body	shore	Body-shore	chr2:10262173-10263481	NA	NA
cg12606391	-0.0868433	0.919299	-11.4684	1.83328e-16	4.87802e-14	27.1966	0.96272	0.875877	-0.0868433	13	26852712	F	II	CDK8	Body	opensea	Body-opensea		NA	NA
cg01440489	0.292657	0.378972	11.4682	1.83467e-16	4.87848e-14	27.1958	0.232643	0.5253	0.292657	13	41593385	R	II	ELF1	5'UTR	opensea	5'UTR-opensea		NA	NA
cg26410635	-0.19848	0.765535	-11.466	1.84868e-16	4.91246e-14	27.1883	0.864775	0.666295	-0.19848	12	96350720	F	II	AMDHD1	Body	island	Body-island	chr12:96350518-96350721	NA	NA
cg22588546	-0.140482	0.829428	-11.4617	1.87658e-16	4.97671e-14	27.1735	0.899669	0.759187	-0.140482	17	8382941	F	II	MYH10	Body	shelf	Body-shelf	chr17:8380172-8380539	TRUE	NA		rs72845105
cg12827262	-0.408016	0.33276	-11.4575	1.90459e-16	5.04097e-14	27.1588	0.536768	0.128752	-0.408016	6	35479910	F	II	TULP1	Body	island	Body-island	chr6:35479872-35480154	NA	NA
cg03696599	-0.24069	0.270566	-11.4565	1.91138e-16	5.05563e-14	27.1553	0.390911	0.150221	-0.24069	2	124782261	R	I	CNTNAP5	TSS1500	island	TSS1500-island	chr2:124782252-124783255	NA	NA
cg17862981	-0.113613	0.884067	-11.455	1.9213e-16	5.07851e-14	27.1501	0.940874	0.827261	-0.113613	2	149869265	F	II	KIF5C	3'UTR	shelf	3'UTR-shelf	chr2:149866654-149866890	NA	NA
cg08435780	0.216604	0.520781	11.4543	1.92598e-16	5.08752e-14	27.1477	0.412479	0.629082	0.216604	16	49749891	F	I	ZNF423	Body	opensea	Body-opensea		NA	TRUE		rs8054396
cg19620724	-0.355887	0.368675	-11.4536	1.93068e-16	5.09563e-14	27.1453	0.546619	0.190731	-0.355887	6	50810852	R	II	TFAP2B	Body	island	Body-island	chr6:50810642-50810994	NA	NA
cg00238818	-0.125916	0.87007	-11.4535	1.9316e-16	5.09563e-14	27.1448	0.933028	0.807112	-0.125916	5	176880261	F	II	PRR7	5'UTR	shore	5'UTR-shore	chr5:176881221-176883117	NA	NA
cg12190994	-0.258125	0.742435	-11.4503	1.95375e-16	5.15004e-14	27.1335	0.871497	0.613373	-0.258125	7	4305061	F	II	SDK1	Body	island	Body-island	chr7:4303079-4305062	NA	NA
cg07967677	0.238582	0.333034	11.4501	1.95479e-16	5.15004e-14	27.133	0.213743	0.452325	0.238582	1	161008977	R	II	TSTD1	TSS1500	shore	TSS1500-shore	chr1:161008377-161008830	TRUE	NA
cg05589845	-0.323302	0.27139	-11.4489	1.96273e-16	5.16756e-14	27.129	0.433041	0.109738	-0.323302	7	27282444	R	II	EVX1	1stExon	island	1stExon-island	chr7:27282086-27283136	TRUE	NA
cg19178151	-0.167217	0.804167	-11.4486	1.96508e-16	5.17036e-14	27.1278	0.887775	0.720559	-0.167217	4	184938359	F	II	STOX2	Body	opensea	Body-opensea		NA	TRUE
cg26077811	0.238517	0.301683	11.4464	1.98018e-16	5.20667e-14	27.1202	0.182425	0.420942	0.238517	11	119232263	R	II	USP2	Body	shelf	Body-shelf	chr11:119234480-119235214	TRUE	NA
cg07514159	-0.148873	0.6891	-11.4456	1.98604e-16	5.21864e-14	27.1173	0.763536	0.614663	-0.148873	10	80982257	R	I	ZMIZ1	Body	opensea	Body-opensea		NA	TRUE
cg02011392	-0.403346	0.302155	-11.4447	1.99243e-16	5.23151e-14	27.1141	0.503828	0.100481	-0.403346	6	101847541	R	II	GRIK2	Body	shore	Body-shore	chr6:101846766-101847135	NA	NA
cg07679219	-0.13057	0.817804	-11.4445	1.99355e-16	5.23151e-14	27.1135	0.883089	0.752519	-0.13057	12	77417738	F	I	E2F7	3'UTR	opensea	3'UTR-opensea		NA	NA
cg02213103	-0.422719	0.471016	-11.4433	2.00195e-16	5.25013e-14	27.1094	0.682376	0.259657	-0.422719	3	181421548	R	II	SOX2OT	Body	opensea	Body-opensea		NA	TRUE
cg02406098	-0.174352	0.810569	-11.44	2.02512e-16	5.30395e-14	27.098	0.897745	0.723393	-0.174352	3	32911355	R	II	TRIM71	Body	opensea	Body-opensea		NA	TRUE
cg13046832	-0.302378	0.228833	-11.4373	2.04477e-16	5.35192e-14	27.0884	0.380022	0.0776443	-0.302378	14	29254680	F	I	C14orf23	Body	island	Body-island	chr14:29254365-29255069	NA	NA
cg14847243	-0.176553	0.740141	-11.4357	2.05589e-16	5.3775e-14	27.083	0.828417	0.651864	-0.176553	3	184104362	F	I	CHRD	Body	island	Body-island	chr3:184104308-184104519	NA	NA
cg27517681	-0.308182	0.516424	-11.4259	2.12763e-16	5.54705e-14	27.049	0.670515	0.362333	-0.308182	1	119528848	F	II	TBX15	5'UTR	shore	5'UTR-shore	chr1:119529819-119530712	NA	NA		rs73011334
cg24626659	0.298691	0.453676	11.4244	2.13928e-16	5.57051e-14	27.0436	0.304331	0.603022	0.298691	10	134754286	F	I	C10orf93	Body	shore	Body-shore	chr10:134755663-134756852	NA	NA		rs4242712	rs11596505
cg18986651	-0.198539	0.739829	-11.4244	2.13941e-16	5.57051e-14	27.0436	0.839099	0.640559	-0.198539	3	145860909	R	II	PLOD2	Body	opensea	Body-opensea		NA	TRUE
cg22352800	-0.296316	0.542542	-11.4179	2.18874e-16	5.69157e-14	27.021	0.6907	0.394384	-0.296316	2	177014467	R	II	MIR10B	TSS1500	shore	TSS1500-shore	chr2:177014948-177015214	NA	NA
cg06756919	-0.362994	0.415288	-11.4122	2.23309e-16	5.79937e-14	27.0011	0.596785	0.233791	-0.362994	14	37135898	R	II	PAX9	Body	island	Body-island	chr14:37135513-37136348	NA	NA
cg04027548	-0.258283	0.548255	-11.4045	2.29357e-16	5.94488e-14	26.9746	0.677397	0.419114	-0.258283	12	21926447	R	I	KCNJ8	Body	opensea	Body-opensea		NA	NA
cg16887264	-0.319626	0.206839	-11.4032	2.30412e-16	5.96835e-14	26.9701	0.366652	0.0470261	-0.319626	4	147561775	F	I	POU4F2	Body	island	Body-island	chr4:147559205-147561901	NA	TRUE		rs61733419
cg18432877	-0.132906	0.871666	-11.4023	2.31175e-16	5.97712e-14	26.9668	0.938119	0.805213	-0.132906	17	65190638	R	II	HELZ	Body	opensea	Body-opensea		NA	TRUE
cg24553417	-0.32553	0.565813	-11.4023	2.31198e-16	5.97712e-14	26.9667	0.728578	0.403049	-0.32553	13	50244794	R	II	EBPL	Body	opensea	Body-opensea		NA	TRUE
cg26759179	-0.238367	0.658145	-11.399	2.33883e-16	6.03485e-14	26.9552	0.777328	0.538961	-0.238367	10	121125566	F	II	GRK5	Body	opensea	Body-opensea		NA	TRUE
cg04802221	-0.125931	0.835264	-11.3967	2.35788e-16	6.07618e-14	26.9472	0.898229	0.772298	-0.125931	16	67223955	F	II	EXOC3L	5'UTR	opensea	5'UTR-opensea		NA	NA
cg23677657	-0.295883	0.561476	-11.3955	2.3673e-16	6.09655e-14	26.9433	0.709418	0.413535	-0.295883	7	96619076	F	II	DLX6AS	Body	opensea	Body-opensea		NA	TRUE		rs34413484
cg06245037	-0.298032	0.243739	-11.3953	2.36918e-16	6.09747e-14	26.9425	0.392755	0.094723	-0.298032	11	44332938	F	I	ALX4	TSS1500	shore	TSS1500-shore	chr11:44330542-44331761	TRUE	NA		rs2054030
cg10635645	-0.099535	0.896473	-11.3926	2.39212e-16	6.14466e-14	26.9329	0.946241	0.846706	-0.099535	12	12938397	F	II	APOLD1	Body	shore	Body-shore	chr12:12939713-12940391	NA	NA
cg26690592	0.188748	0.177618	11.3917	2.39939e-16	6.15941e-14	26.9299	0.0832444	0.271993	0.188748	11	19261879	R	II	E2F8	5'UTR	shore	5'UTR-shore	chr11:19261912-19262156	NA	NA
cg08684361	0.206572	0.212474	11.391	2.40516e-16	6.16125e-14	26.9275	0.109188	0.31576	0.206572	6	30852823	F	II	DDR1	5'UTR	shore	5'UTR-shore	chr6:30852102-30852676	NA	NA
cg10156274	-0.149066	0.830964	-11.3908	2.407e-16	6.16125e-14	26.9268	0.905497	0.756431	-0.149066	12	12247855	F	II	BCL2L14	Body	opensea	Body-opensea		NA	NA
cg04213384	-0.198221	0.725483	-11.3907	2.4078e-16	6.16125e-14	26.9264	0.824594	0.626372	-0.198221	13	98960589	R	I	FARP1	Body	opensea	Body-opensea		NA	NA
cg17450733	-0.367731	0.45415	-11.3886	2.42597e-16	6.19982e-14	26.919	0.638015	0.270285	-0.367731	12	45443875	F	II	DBX2	Body	shore	Body-shore	chr12:45444202-45445386	NA	NA			rs74080478
cg00329300	0.164755	0.31465	11.3877	2.43364e-16	6.21546e-14	26.9159	0.232273	0.397028	0.164755	1	161008462	R	I	TSTD1	Body	island	Body-island	chr1:161008377-161008830	TRUE	NA
cg11862144	0.35874	0.683567	11.3868	2.44072e-16	6.22957e-14	26.913	0.504197	0.862937	0.35874	18	61143961	R	I	SERPINB5	TSS200	opensea	TSS200-opensea		NA	NA
cg14099468	-0.26279	0.597532	-11.3851	2.45607e-16	6.26477e-14	26.9068	0.728927	0.466138	-0.26279	1	235814814	R	II	GNG4	TSS1500	shore	TSS1500-shore	chr1:235811841-235814066	NA	NA
cg19320820	-0.341707	0.415815	-11.3847	2.45874e-16	6.26758e-14	26.9057	0.586668	0.244961	-0.341707	4	87966326	F	I	AFF1	Body	opensea	Body-opensea		NA	TRUE		rs79002023	rs80021868
cg12938814	-0.170041	0.866781	-11.384	2.46525e-16	6.28018e-14	26.9031	0.951801	0.78176	-0.170041	5	154253549	R	II	CNOT8	Body	opensea	Body-opensea		NA	NA
cg21807034	0.307821	0.679488	11.3836	2.46904e-16	6.2847e-14	26.9016	0.525578	0.833398	0.307821	18	61144150	R	I	SERPINB5	1stExon	opensea	1stExon-opensea		NA	NA
cg11647420	-0.147992	0.810826	-11.3834	2.47016e-16	6.2847e-14	26.9011	0.884822	0.73683	-0.147992	10	21186217	R	II	NEBL	5'UTR	opensea	5'UTR-opensea		NA	NA
cg13587449	-0.152793	0.81289	-11.3803	2.49759e-16	6.34644e-14	26.8902	0.889286	0.736493	-0.152793	10	72240883	F	II	KIAA1274	5'UTR	shelf	5'UTR-shelf	chr10:72237661-72238821	NA	NA
cg23179181	0.133277	0.320272	11.3791	2.50802e-16	6.36889e-14	26.886	0.253634	0.386911	0.133277	17	27945461	R	I	CORO6	Body	shore	Body-shore	chr17:27942532-27945388	TRUE	NA
cg02902946	0.286771	0.583867	11.3782	2.51585e-16	6.3807e-14	26.8829	0.440482	0.727252	0.286771	20	57617168	F	II	SLMO2	Body	shore	Body-shore	chr20:57617430-57618222	NA	NA
cg24116870	-0.303628	0.234143	-11.3757	2.5385e-16	6.43405e-14	26.8741	0.385957	0.0823295	-0.303628	12	43946284	F	II	ADAMTS20	TSS1500	island	TSS1500-island	chr12:43944719-43946285	NA	NA
cg26764198	-0.102079	0.848884	-11.375	2.54405e-16	6.44406e-14	26.8719	0.899923	0.797844	-0.102079	16	87469002	F	II	ZCCHC14	Body	opensea	Body-opensea		NA	NA
cg06638795	-0.209259	0.548292	-11.3738	2.55504e-16	6.46373e-14	26.8676	0.652922	0.443663	-0.209259	2	42719933	R	I	KCNG3	Body	island	Body-island	chr2:42719784-42722166	NA	NA
cg02311364	-0.130626	0.815666	-11.373	2.56199e-16	6.47721e-14	26.8649	0.880978	0.750353	-0.130626	3	13001256	R	II	IQSEC1	Body	opensea	Body-opensea		NA	TRUE
cg24468890	0.167741	0.310797	11.3686	2.60276e-16	6.57201e-14	26.8493	0.226926	0.394667	0.167741	1	32757294	R	II	HDAC1	TSS1500	shore	TSS1500-shore	chr1:32757414-32758034	NA	NA
cg17826834	0.338895	0.473173	11.3675	2.61199e-16	6.59115e-14	26.8458	0.303726	0.642621	0.338895	15	96868857	R	II	NR2F2	TSS1500	shelf	TSS1500-shelf	chr15:96864881-96866787	NA	TRUE
cg24693341	-0.402391	0.333619	-11.3657	2.62912e-16	6.62604e-14	26.8393	0.534815	0.132424	-0.402391	4	41746947	R	II	PHOX2B	3'UTR	shore	3'UTR-shore	chr4:41747508-41747944	NA	NA
cg07977202	-0.208198	0.558917	-11.361	2.67299e-16	6.72813e-14	26.8229	0.663016	0.454818	-0.208198	11	66311348	R	I	ZDHHC24	Body	shore	Body-shore	chr11:66313169-66313822	NA	NA
cg14405813	-0.184563	0.700456	-11.3541	2.73858e-16	6.88025e-14	26.7989	0.792737	0.608174	-0.184563	7	139414573	R	II	HIPK2	Body	shore	Body-shore	chr7:139416286-139416522	NA	TRUE
cg25126698	-0.17118	0.564067	-11.3489	2.78912e-16	6.99845e-14	26.7808	0.649657	0.478477	-0.17118	5	140751840	R	I	PCDHGA4	Body	island	Body-island	chr5:140751298-140751883	NA	NA
cg08764162	-0.235992	0.681125	-11.3471	2.80711e-16	7.03918e-14	26.7744	0.799121	0.563129	-0.235992	10	31147088	F	II	ZNF438	Body	opensea	Body-opensea		NA	TRUE		rs79523820
cg25227672	0.276661	0.660965	11.3446	2.83188e-16	7.09686e-14	26.7657	0.522635	0.799296	0.276661	11	124805912	R	II	HEPACAM	5'UTR	opensea	5'UTR-opensea		NA	NA	low-CpG:124311077-124311574
cg12273284	0.334948	0.329595	11.3434	2.84356e-16	7.11724e-14	26.7616	0.162121	0.497069	0.334948	10	12490844	F	I	CAMK1D	Body	opensea	Body-opensea		TRUE	NA
cg13499324	0.233301	0.748211	11.3422	2.85599e-16	7.14389e-14	26.7573	0.631561	0.864862	0.233301	9	3441530	F	II	RFX3	5'UTR	opensea	5'UTR-opensea		NA	NA
cg07999201	0.303585	0.778066	11.3376	2.90267e-16	7.25611e-14	26.7412	0.626273	0.929859	0.303585	4	16587121	F	II	LDB2	Body	opensea	Body-opensea		NA	TRUE		rs7667956
cg19709355	-0.220134	0.320577	-11.336	2.91842e-16	7.2864e-14	26.7358	0.430644	0.21051	-0.220134	17	38504102	F	I	RARA	Body	shelf	Body-shelf	chr17:38501396-38501839	NA	TRUE
cg19730691	-0.22238	0.523148	-11.3343	2.93615e-16	7.32609e-14	26.7298	0.634338	0.411958	-0.22238	1	119526437	F	I	TBX15	5'UTR	shore	5'UTR-shore	chr1:119526782-119527192	NA	NA			rs73011325
cg23079522	-0.106714	0.889274	-11.3318	2.96185e-16	7.38562e-14	26.7212	0.942631	0.835917	-0.106714	3	160569628	R	II	PPM1L	Body	opensea	Body-opensea		NA	TRUE
cg18988498	-0.27525	0.39503	-11.331	2.97072e-16	7.40313e-14	26.7182	0.532655	0.257404	-0.27525	11	31824262	F	I	PAX6	Body	shore	Body-shore	chr11:31825743-31826967	NA	NA
cg07628717	0.372095	0.670538	11.3211	3.07598e-16	7.65116e-14	26.6837	0.484491	0.856586	0.372095	7	4752018	R	II	FOXK1	Body	opensea	Body-opensea		TRUE	NA
cg07279557	0.190979	0.297831	11.3177	3.11279e-16	7.73794e-14	26.6719	0.202342	0.393321	0.190979	21	46875417	F	I	COL18A1	TSS200	shore	TSS200-shore	chr21:46876168-46876752	TRUE	NA			rs75503020
cg00187686	0.304951	0.645173	11.3126	3.1696e-16	7.86452e-14	26.654	0.492697	0.797648	0.304951	11	59634218	R	II	TCN1	TSS200	opensea	TSS200-opensea		NA	NA
cg21497990	-0.339	0.286243	-11.3113	3.1843e-16	7.89122e-14	26.6494	0.455744	0.116743	-0.339	7	155255122	F	I	EN2	Body	island	Body-island	chr7:155255098-155255311	NA	NA		rs75103128
cg21545720	0.306011	0.711963	11.3101	3.19699e-16	7.91776e-14	26.6455	0.558958	0.864969	0.306011	1	32405083	F	II	PTP4A2	TSS1500	shore	TSS1500-shore	chr1:32403387-32404382	NA	NA
cg02036261	-0.3097	0.317369	-11.3081	3.21954e-16	7.96869e-14	26.6385	0.472218	0.162519	-0.3097	14	57276057	R	I	OTX2	5'UTR	island	5'UTR-island	chr14:57274607-57276840	NA	NA
cg25422797	-0.135835	0.832795	-11.3073	3.22911e-16	7.98745e-14	26.6356	0.900713	0.764878	-0.135835	17	73506046	R	II	CASKIN2	Body	opensea	Body-opensea		NA	NA
cg08363345	0.386741	0.615667	11.3037	3.26977e-16	8.07803e-14	26.6232	0.422296	0.809037	0.386741	7	4752063	F	II	FOXK1	Body	opensea	Body-opensea		TRUE	NA
cg16620032	0.189541	0.207559	11.303	3.2778e-16	8.09289e-14	26.6207	0.112788	0.302329	0.189541	19	46097075	R	II	GPR4	5'UTR	shore	5'UTR-shore	chr19:46094334-46095111	NA	NA
cg14557487	-0.295183	0.461197	-11.3019	3.29093e-16	8.1203e-14	26.6168	0.608789	0.313605	-0.295183	2	162279686	R	II	TBR1	Body	shore	Body-shore	chr2:162279835-162280709	NA	NA
cg22047672	-0.127287	0.855023	-11.3004	3.30808e-16	8.1526e-14	26.6116	0.918667	0.791379	-0.127287	1	150275877	R	II	MRPS21	Body	opensea	Body-opensea		NA	TRUE
cg22143352	-0.280673	0.675699	-11.2997	3.31633e-16	8.1679e-14	26.6092	0.816035	0.535362	-0.280673	14	75897841	R	II	JDP2	5'UTR	shelf	5'UTR-shelf	chr14:75894308-75895469	NA	NA
cg06135480	0.0824547	0.147176	11.2966	3.35345e-16	8.25425e-14	26.5981	0.105949	0.188403	0.0824547	16	85644718	R	I	KIAA0182	TSS1500	shore	TSS1500-shore	chr16:85644947-85649027	NA	NA
cg26054057	-0.162605	0.763433	-11.2962	3.35831e-16	8.25674e-14	26.5967	0.844735	0.682131	-0.162605	3	38010715	F	II	CTDSPL	Body	opensea	Body-opensea		NA	NA		rs35203388
cg09548780	-0.353597	0.44171	-11.2947	3.37599e-16	8.28936e-14	26.5915	0.618509	0.264912	-0.353597	2	218770270	R	II	TNS1	5'UTR	opensea	5'UTR-opensea		NA	NA
cg21488279	-0.195744	0.556001	-11.2927	3.39928e-16	8.3366e-14	26.5847	0.653873	0.458129	-0.195744	5	122434178	F	I	PRDM6	Body	island	Body-island	chr5:122433878-122435551	NA	NA
cg07369606	0.293655	0.64107	11.2927	3.39939e-16	8.3366e-14	26.5846	0.494242	0.787897	0.293655	17	80290169	F	I	SECTM1	5'UTR	shore	5'UTR-shore	chr17:80291020-80292394	NA	NA
cg15798385	-0.354691	0.539355	-11.2924	3.40359e-16	8.34179e-14	26.5834	0.716701	0.36201	-0.354691	7	27281569	F	II	EVX1	TSS1500	shore	TSS1500-shore	chr7:27282086-27283136	NA	NA
cg13894535	0.300271	0.467971	11.2897	3.43556e-16	8.41501e-14	26.5742	0.317835	0.618106	0.300271	5	35919491	F	II	CAPSL	Body	opensea	Body-opensea		TRUE	TRUE		rs6872175
cg17863743	-0.329998	0.256178	-11.289	3.44425e-16	8.43114e-14	26.5716	0.421177	0.0911792	-0.329998	10	100993587	R	I	HPSE2	Body	shore	Body-shore	chr10:100993820-100994188	NA	TRUE	low-CpG:100983425-100983697
cg07343511	-0.117724	0.850057	-11.2865	3.47467e-16	8.49523e-14	26.5629	0.908919	0.791194	-0.117724	1	9078477	R	II	SLC2A7	Body	opensea	Body-opensea		NA	NA
cg05700079	-0.276381	0.513295	-11.2858	3.48353e-16	8.51169e-14	26.5604	0.651486	0.375105	-0.276381	3	147126961	R	II	ZIC1	TSS1500	shore	TSS1500-shore	chr3:147126988-147128999	NA	NA
cg22904737	-0.369762	0.413585	-11.2851	3.49149e-16	8.52593e-14	26.5581	0.598465	0.228704	-0.369762	17	36735245	F	II	SRCIN1	Body	island	Body-island	chr17:36734659-36735246	NA	TRUE
cg16179952	-0.300279	0.44882	-11.282	3.52983e-16	8.6143e-14	26.5473	0.59896	0.298681	-0.300279	2	947117	R	II	SNTG2	Body	island	Body-island	chr2:946881-947286	TRUE	NA
cg26698460	-0.257325	0.697726	-11.2798	3.55771e-16	8.67708e-14	26.5395	0.826388	0.569063	-0.257325	19	58716004	R	II	ZNF274	Body	island	Body-island	chr19:58715220-58716033	NA	NA
cg22967396	-0.307659	0.313707	-11.2796	3.56018e-16	8.6778e-14	26.5388	0.467536	0.159878	-0.307659	14	57283942	F	II	OTX2OS1	Body	shore	Body-shore	chr14:57283967-57284558	NA	NA		rs2274793
cg09336899	-0.255045	0.688279	-11.2778	3.5823e-16	8.72112e-14	26.5327	0.815801	0.560757	-0.255045	2	233766002	F	I	NGEF	Body	island	Body-island	chr2:233765849-233766119	NA	NA		rs12612786	rs12996733
cg04768697	-0.284564	0.287091	-11.2761	3.60422e-16	8.76915e-14	26.5267	0.429373	0.144809	-0.284564	19	15122135	F	I	CCDC105	1stExon	island	1stExon-island	chr19:15121590-15122143	NA	NA
cg17340519	-0.319596	0.426496	-11.2738	3.63317e-16	8.83421e-14	26.5187	0.586294	0.266698	-0.319596	1	224805852	F	II	CNIH3	Body	island	Body-island	chr1:224805408-224805853	NA	NA
cg11441693	0.253397	0.281573	11.2727	3.64819e-16	8.86537e-14	26.5146	0.154874	0.408271	0.253397	17	48194635	R	II	SAMD14	Body	island	Body-island	chr17:48194634-48195085	TRUE	NA
cg22368204	0.275387	0.54751	11.271	3.67024e-16	8.90274e-14	26.5087	0.409817	0.685204	0.275387	20	62055252	R	I	KCNQ2	Body	shore	Body-shore	chr20:62052907-62053326	NA	NA
cg09543635	-0.0964469	0.878149	-11.2685	3.70277e-16	8.9708e-14	26.4999	0.926373	0.829926	-0.0964469	3	48266468	F	II	CAMP	Body	opensea	Body-opensea		NA	NA
cg05474726	-0.412569	0.313525	-11.2623	3.78389e-16	9.16178e-14	26.4784	0.51981	0.10724	-0.412569	8	65291523	F	II	MIR124-2	TSS200	shore	TSS200-shore	chr8:65290108-65290946	NA	NA
cg06890747	-0.45504	0.436246	-11.262	3.78847e-16	9.16735e-14	26.4772	0.663767	0.208726	-0.45504	7	39649290	R	II	LOC646999	Body	island	Body-island	chr7:39649253-39649510	TRUE	TRUE
cg14507337	-0.346415	0.27795	-11.2601	3.81316e-16	9.22151e-14	26.4708	0.451158	0.104743	-0.346415	14	60978161	F	I	SIX6	3'UTR	island	3'UTR-island	chr14:60975732-60978180	NA	NA
cg19897071	-0.27101	0.385136	-11.2578	3.84547e-16	9.28845e-14	26.4624	0.52064	0.249631	-0.27101	5	35991382	F	I	UGT3A1	5'UTR	opensea	5'UTR-opensea		NA	TRUE
cg01302656	-0.298752	0.457985	-11.2568	3.85819e-16	9.31357e-14	26.4592	0.607361	0.308609	-0.298752	14	29254853	F	II	C14orf23	Body	island	Body-island	chr14:29254365-29255069	NA	NA
cg09255514	-0.214886	0.715266	-11.2558	3.87149e-16	9.34003e-14	26.4558	0.822709	0.607823	-0.214886	16	16181832	R	II	ABCC1	Body	opensea	Body-opensea		NA	TRUE
cg15154628	-0.174483	0.80901	-11.2545	3.89033e-16	9.37984e-14	26.4509	0.896252	0.721769	-0.174483	7	76871793	F	II	CCDC146	Body	opensea	Body-opensea		NA	TRUE
cg06698795	-0.224089	0.509263	-11.2522	3.92118e-16	9.42944e-14	26.4431	0.621307	0.397218	-0.224089	3	126260615	F	I	CHST13	Body	island	Body-island	chr3:126260488-126261356	TRUE	NA		rs12495696
cg12127282	-0.378646	0.455185	-11.2522	3.92123e-16	9.42944e-14	26.4431	0.644508	0.265862	-0.378646	2	177014685	R	II	HOXD4	TSS1500	shore	TSS1500-shore	chr2:177014948-177015214	NA	NA
cg15285250	-0.397154	0.29163	-11.2514	3.93238e-16	9.44711e-14	26.4403	0.490208	0.0930534	-0.397154	7	8482107	F	II	NXPH1	Body	island	Body-island	chr7:8481974-8482762	NA	NA
cg06485521	-0.199592	0.710952	-11.2495	3.95987e-16	9.50746e-14	26.4334	0.810748	0.611156	-0.199592	6	53530600	R	II	KLHL31	TSS200	opensea	TSS200-opensea		NA	NA
cg20970886	0.355998	0.7016	11.2483	3.97611e-16	9.52932e-14	26.4293	0.523601	0.879599	0.355998	3	192568714	F	II	C3orf59	Body	opensea	Body-opensea		NA	TRUE
cg06812574	0.25127	0.43433	11.2477	3.98498e-16	9.54488e-14	26.4271	0.308695	0.559965	0.25127	10	18331664	F	II	SLC39A12	Body	opensea	Body-opensea		NA	NA
cg23479922	-0.363474	0.426071	-11.2474	3.98905e-16	9.5489e-14	26.4261	0.607808	0.244334	-0.363474	5	16179633	F	I	2019-03-11	1stExon	island	1stExon-island	chr5:16179064-16180420	TRUE	NA	high-CpG:16232578-16232839
cg21145245	-0.397044	0.378313	-11.2425	4.058e-16	9.70816e-14	26.4091	0.576835	0.179791	-0.397044	5	150593684	R	II	CCDC69	Body	opensea	Body-opensea		TRUE	TRUE
cg23043143	0.334096	0.587186	11.2419	4.06712e-16	9.72418e-14	26.4069	0.420138	0.754234	0.334096	7	2612101	F	II	IQCE	Body	opensea	Body-opensea		NA	TRUE
cg26626042	-0.0782799	0.896997	-11.2415	4.07333e-16	9.73322e-14	26.4054	0.936137	0.857857	-0.0782799	6	32151594	F	II	AGER	Body	opensea	Body-opensea		NA	NA
cg04414451	-0.269167	0.494991	-11.2398	4.0975e-16	9.78513e-14	26.3995	0.629574	0.360407	-0.269167	2	108993844	R	II	SULT1C4	TSS1500	opensea	TSS1500-opensea		NA	TRUE
cg20957164	-0.109201	0.833675	-11.2365	4.14491e-16	9.8807e-14	26.3881	0.888276	0.779075	-0.109201	3	12965323	F	II	IQSEC1	Body	opensea	Body-opensea		NA	TRUE
cg02395846	-0.464329	0.375052	-11.2351	4.16555e-16	9.91808e-14	26.3832	0.607216	0.142888	-0.464329	17	43037309	R	II	C1QL1	3'UTR	island	3'UTR-island	chr17:43037166-43037740	NA	TRUE
cg04838988	-0.327973	0.299598	-11.234	4.18238e-16	9.95175e-14	26.3792	0.463585	0.135612	-0.327973	8	70984437	F	II	PRDM14	TSS1500	island	TSS1500-island	chr8:70981873-70984888	TRUE	NA
cg07775417	0.347381	0.569026	11.2329	4.19825e-16	9.97817e-14	26.3754	0.395336	0.742717	0.347381	4	84469563	F	II	AGPAT9	Body	opensea	Body-opensea		TRUE	TRUE
cg09159022	-0.365985	0.350302	-11.2323	4.2065e-16	9.99184e-14	26.3735	0.533294	0.167309	-0.365985	8	4849522	F	II	CSMD1	Body	island	Body-island	chr8:4848968-4852635	NA	NA
cg12265623	-0.344687	0.399108	-11.2267	4.29177e-16	1.01643e-13	26.3536	0.571452	0.226765	-0.344687	7	8481994	R	II	NXPH1	Body	island	Body-island	chr7:8481974-8482762	NA	NA
cg16435923	-0.173316	0.543494	-11.225	4.31694e-16	1.02065e-13	26.3478	0.630152	0.456836	-0.173316	5	140744155	R	I	PCDHGA4	Body	island	Body-island	chr5:140743961-140744642	NA	NA
cg09970569	-0.365905	0.278557	-11.225	4.31779e-16	1.02065e-13	26.3476	0.461509	0.0956045	-0.365905	8	109094032	R	II	RSPO2	Body	shore	Body-shore	chr8:109094485-109095849	NA	NA
cg25602159	0.140198	0.142117	11.2247	4.32178e-16	1.02065e-13	26.3467	0.072018	0.212216	0.140198	19	41222284	R	II	ADCK4	5'UTR	shore	5'UTR-shore	chr19:41222598-41223162	NA	NA
cg22637867	-0.363005	0.463109	-11.2247	4.32234e-16	1.02065e-13	26.3466	0.644612	0.281607	-0.363005	19	12624466	F	II	ZNF709	5'UTR	island	5'UTR-island	chr19:12624273-12624477	NA	NA			rs35376025
cg22970357	-0.283001	0.417948	-11.2242	4.32851e-16	1.02151e-13	26.3452	0.559448	0.276447	-0.283001	2	119600408	R	II	EN1	3'UTR	island	3'UTR-island	chr2:119599458-119600966	NA	NA
cg15092343	-0.364049	0.335619	-11.2231	4.34575e-16	1.02434e-13	26.3412	0.517643	0.153594	-0.364049	4	4860061	F	I	MSX1	TSS1500	island	TSS1500-island	chr4:4859632-4860191	NA	NA		rs76561716
cg08137085	-0.213584	0.814699	-11.2188	4.41227e-16	1.03822e-13	26.3262	0.921491	0.707907	-0.213584	7	1117540	R	II	C7orf50	Body	shelf	Body-shelf	chr7:1119980-1120248	NA	NA
cg00812557	-0.285352	0.411006	-11.2143	4.48369e-16	1.05255e-13	26.3102	0.553681	0.26833	-0.285352	4	38073835	F	II	TBC1D1	Body	opensea	Body-opensea		NA	TRUE		rs34010692
cg18268547	-0.342094	0.5796	-11.2103	4.54673e-16	1.06485e-13	26.2964	0.750647	0.408553	-0.342094	17	79615552	F	II	TSPAN10	3'UTR	island	3'UTR-island	chr17:79614850-79615559	NA	NA		rs7405453
cg10592734	0.316106	0.632657	11.2067	4.60598e-16	1.07684e-13	26.2836	0.474604	0.79071	0.316106	7	139570596	R	I	TBXAS1	Body	opensea	Body-opensea		NA	TRUE
cg23189410	-0.329677	0.458742	-11.2063	4.61282e-16	1.07733e-13	26.2821	0.62358	0.293904	-0.329677	3	147125712	F	I	ZIC4	TSS1500	shore	TSS1500-shore	chr3:147126988-147128999	NA	TRUE
cg02058870	-0.32068	0.56307	-11.2061	4.61613e-16	1.07733e-13	26.2814	0.72341	0.40273	-0.32068	14	72053146	R	II	SIPA1L1	5'UTR	opensea	5'UTR-opensea		NA	TRUE
cg03383268	-0.275006	0.213002	-11.2056	4.62345e-16	1.07841e-13	26.2798	0.350505	0.0754996	-0.275006	2	218770237	F	II	TNS1	5'UTR	opensea	5'UTR-opensea		NA	NA
cg20438306	-0.319417	0.256419	-11.205	4.63378e-16	1.07956e-13	26.2776	0.416128	0.0967105	-0.319417	4	41747092	R	I	PHOX2B	3'UTR	shore	3'UTR-shore	chr4:41747508-41747944	NA	NA
cg23429240	-0.204438	0.72115	-11.2037	4.65422e-16	1.08369e-13	26.2732	0.823369	0.618931	-0.204438	12	109040983	F	II	CORO1C	3'UTR	opensea	3'UTR-opensea		NA	NA
cg04835431	-0.110467	0.897828	-11.203	4.66606e-16	1.08557e-13	26.2707	0.953061	0.842594	-0.110467	14	105684005	F	I	BRF1	Body	shore	Body-shore	chr14:105684955-105685159	NA	NA
cg05860723	-0.311356	0.306774	-11.2029	4.66768e-16	1.08557e-13	26.2704	0.462452	0.151095	-0.311356	12	81102486	R	I	MYF6	Body	island	Body-island	chr12:81102034-81102716	NA	NA
cg25376310	0.198172	0.3749	11.2024	4.67671e-16	1.08703e-13	26.2685	0.275814	0.473986	0.198172	6	158018910	R	II	ZDHHC14	Body	opensea	Body-opensea		TRUE	TRUE
cg27407147	-0.346487	0.406091	-11.1991	4.73045e-16	1.09825e-13	26.2571	0.579334	0.232847	-0.346487	15	89920824	R	I	LOC254559	TSS1500	island	TSS1500-island	chr15:89920793-89922768	NA	NA
cg19544065	0.270537	0.672853	11.1981	4.74747e-16	1.10156e-13	26.2536	0.537584	0.808121	0.270537	2	2178847	F	II	MYT1L	5'UTR	opensea	5'UTR-opensea		NA	TRUE
cg16578387	-0.118625	0.839583	-11.1979	4.75183e-16	1.10194e-13	26.2527	0.898896	0.78027	-0.118625	11	33744043	F	II	CD59	5'UTR	opensea	5'UTR-opensea		NA	NA
cg16565696	0.251078	0.240214	11.1967	4.77063e-16	1.10566e-13	26.2488	0.114675	0.365753	0.251078	20	44834899	R	II	CDH22	Body	shelf	Body-shelf	chr20:44838887-44839204	TRUE	NA
cg06505619	0.273376	0.635905	11.1964	4.77652e-16	1.10638e-13	26.2475	0.499217	0.772594	0.273376	16	698072	R	I	WDR90	TSS1500	shore	TSS1500-shore	chr16:698826-700244	NA	NA
cg22167400	-0.196875	0.673244	-11.1953	4.79478e-16	1.10997e-13	26.2437	0.771681	0.574806	-0.196875	17	26633978	F	II	FLJ40504	Body	island	Body-island	chr17:26633894-26634470	NA	NA
cg02773086	-0.312062	0.397807	-11.1911	4.86729e-16	1.12546e-13	26.2289	0.553838	0.241776	-0.312062	2	177027440	F	I	HOXD3	TSS1500	shore	TSS1500-shore	chr2:177027617-177028014	NA	NA
cg20457796	-0.212	0.239048	-11.1907	4.87322e-16	1.12618e-13	26.2277	0.345048	0.133048	-0.212	10	50819500	R	I	SLC18A3	1stExon	island	1stExon-island	chr10:50817601-50820356	NA	NA
cg19969606	-0.257488	0.207258	-11.1882	4.91695e-16	1.13563e-13	26.2188	0.336003	0.0785142	-0.257488	12	113901665	F	II	LHX5	Body	island	Body-island	chr12:113900750-113906442	NA	TRUE		rs34518423	rs10625316
cg23859313	-0.177116	0.747934	-11.1856	4.9618e-16	1.14401e-13	26.2098	0.836492	0.659376	-0.177116	4	2303860	R	I	ZFYVE28	Body	shore	Body-shore	chr4:2305514-2305793	NA	TRUE
cg09017434	-0.32177	0.394743	-11.1837	4.99589e-16	1.15121e-13	26.203	0.555629	0.233858	-0.32177	5	16179660	F	I	2019-03-11	1stExon	island	1stExon-island	chr5:16179064-16180420	TRUE	NA	high-CpG:16232578-16232839
cg24085707	-0.254162	0.520755	-11.182	5.02641e-16	1.15757e-13	26.197	0.647836	0.393674	-0.254162	17	79615652	F	II	TSPAN10	3'UTR	shore	3'UTR-shore	chr17:79614850-79615559	NA	NA		rs12938833
cg07788369	-0.362987	0.355473	-11.1759	5.13622e-16	1.1815e-13	26.1756	0.536967	0.17398	-0.362987	7	96619068	F	I	DLX6AS	Body	opensea	Body-opensea		NA	TRUE		rs34413484
cg13562122	-0.166516	0.84006	-11.1696	5.25195e-16	1.20674e-13	26.1535	0.923318	0.756802	-0.166516	1	21587009	R	II	ECE1	Body	opensea	Body-opensea		NA	NA
cg24407065	-0.104512	0.901156	-11.1689	5.26468e-16	1.20897e-13	26.1511	0.953413	0.8489	-0.104512	1	169335802	F	II	BLZF1	TSS1500	opensea	TSS1500-opensea		NA	NA
cg17872886	-0.237948	0.450845	-11.1678	5.28524e-16	1.2123e-13	26.1472	0.569819	0.331871	-0.237948	2	3642732	R	I	COLEC11	1stExon	island	1stExon-island	chr2:3642547-3642751	TRUE	TRUE
cg14515453	-0.305053	0.272549	-11.1674	5.29345e-16	1.2128e-13	26.1457	0.425075	0.120022	-0.305053	7	19158041	F	II	TWIST1	TSS1500	island	TSS1500-island	chr7:19156050-19158042	TRUE	NA
cg18862481	-0.392242	0.288484	-11.1665	5.30916e-16	1.2157e-13	26.1427	0.484606	0.0923632	-0.392242	3	129693370	F	I	TRH	5'UTR	island	5'UTR-island	chr3:129693127-129694841	NA	NA		rs9860093
cg21491201	0.257179	0.487771	11.1653	5.33293e-16	1.22045e-13	26.1383	0.359181	0.61636	0.257179	7	30545074	R	II	GGCT	TSS1500	shore	TSS1500-shore	chr7:30543984-30545005	NA	NA
cg04833713	0.286341	0.638109	11.1612	5.40999e-16	1.23667e-13	26.1241	0.494939	0.78128	0.286341	10	74871078	R	I	NUDT13	5'UTR	opensea	5'UTR-opensea		NA	TRUE
cg02561482	-0.306917	0.307892	-11.159	5.45222e-16	1.2449e-13	26.1164	0.46135	0.154434	-0.306917	6	50813551	R	I	TFAP2B	3'UTR	island	3'UTR-island	chr6:50813314-50813699	NA	NA
cg24728949	-0.22581	0.566249	-11.1547	5.53612e-16	1.26334e-13	26.1012	0.679154	0.453345	-0.22581	5	106820169	F	II	EFNA5	Body	opensea	Body-opensea		NA	TRUE
cg17780246	-0.258084	0.407915	-11.1503	5.62327e-16	1.28227e-13	26.0858	0.536957	0.278873	-0.258084	19	54481467	R	I	CACNG8	Body	island	Body-island	chr19:54481412-54481955	TRUE	NA
cg21581504	-0.241806	0.521866	-11.15	5.62976e-16	1.28227e-13	26.0846	0.642769	0.400963	-0.241806	2	68545960	F	I	CNRIP1	Body	shore	Body-shore	chr2:68546339-68547111	NA	NA		rs3796057
cg17583957	0.359167	0.734631	11.1499	5.63188e-16	1.28227e-13	26.0842	0.555047	0.914214	0.359167	17	67536299	R	II	MAP2K6	Body	opensea	Body-opensea		NA	TRUE
cg06779253	0.222028	0.49058	11.1489	5.65039e-16	1.28503e-13	26.081	0.379566	0.601594	0.222028	1	9375627	F	II	SPSB1	5'UTR	opensea	5'UTR-opensea		TRUE	TRUE
cg21496803	-0.144102	0.842854	-11.1478	5.6724e-16	1.2893e-13	26.0771	0.914905	0.770803	-0.144102	6	167029080	F	I	RPS6KA2	Body	shelf	Body-shelf	chr6:167032330-167032582	NA	NA
cg24884142	-0.297454	0.340408	-11.1437	5.75649e-16	1.30693e-13	26.0626	0.489135	0.19168	-0.297454	1	119532056	F	I	TBX15	1stExon	island	1stExon-island	chr1:119531991-119532196	NA	TRUE		rs75870087
cg17136011	-0.239702	0.423616	-11.1391	5.85005e-16	1.32557e-13	26.0466	0.543467	0.303765	-0.239702	10	123908897	F	II	TACC2	Body	opensea	Body-opensea		TRUE	TRUE
cg24335984	-0.154258	0.772734	-11.139	5.85225e-16	1.32557e-13	26.0462	0.849863	0.695605	-0.154258	3	50361554	R	II	HYAL2	TSS1500	shore	TSS1500-shore	chr3:50358378-50359606	NA	NA
cg16361253	0.237778	0.645105	11.1389	5.85511e-16	1.32557e-13	26.0457	0.526216	0.763994	0.237778	6	47624276	R	II	GPR111	TSS200	opensea	TSS200-opensea		NA	NA
cg07197230	-0.418372	0.367188	-11.1375	5.88456e-16	1.33148e-13	26.0407	0.576375	0.158002	-0.418372	22	17956641	F	II	CECR2	1stExon	opensea	1stExon-opensea		NA	NA
cg27180868	0.184249	0.244635	11.1363	5.90949e-16	1.33637e-13	26.0365	0.15251	0.336759	0.184249	1	161008750	F	I	TSTD1	5'UTR	island	5'UTR-island	chr1:161008377-161008830	TRUE	NA		rs78929979
cg09533178	-0.186156	0.722231	-11.1354	5.92693e-16	1.33956e-13	26.0336	0.815309	0.629153	-0.186156	19	55630336	F	I	PPP1R12C	TSS1500	shore	TSS1500-shore	chr19:55628488-55629105	NA	NA		rs79793420
cg10848272	-0.3038	0.302319	-11.1314	6.01248e-16	1.35583e-13	26.0194	0.454219	0.150419	-0.3038	14	70653719	R	I	SLC8A3	5'UTR	shore	5'UTR-shore	chr14:70655095-70656077	NA	NA
cg02578087	0.258713	0.368951	11.1312	6.01793e-16	1.3563e-13	26.0185	0.239595	0.498308	0.258713	3	8671361	F	I	C3orf32	Body	opensea	Body-opensea		TRUE	NA
cg01401534	-0.222065	0.573354	-11.1308	6.02534e-16	1.35721e-13	26.0173	0.684386	0.462322	-0.222065	6	4079342	R	I	C6orf201	TSS200	island	TSS200-island	chr6:4079052-4079443	NA	TRUE			rs7756630
cg12492380	0.323973	0.710612	11.1296	6.05162e-16	1.36164e-13	26.013	0.548626	0.872599	0.323973	7	98872169	F	II	MYH16	Body	opensea	Body-opensea		TRUE	NA
cg12910830	-0.127552	0.858462	-11.1296	6.05183e-16	1.36164e-13	26.013	0.922238	0.794686	-0.127552	5	162929657	R	II	MAT2B	TSS1500	shelf	TSS1500-shelf	chr5:162932454-162932946	NA	NA
cg25418484	-0.0953006	0.89758	-11.1272	6.10388e-16	1.37258e-13	26.0045	0.94523	0.84993	-0.0953006	11	71709762	F	II	IL18BP	TSS200	opensea	TSS200-opensea		NA	NA
cg20298668	-0.185768	0.734555	-11.1268	6.11125e-16	1.37347e-13	26.0033	0.827439	0.641672	-0.185768	2	240230663	F	II	HDAC4	Body	opensea	Body-opensea		NA	TRUE
cg02423064	-0.299799	0.262315	-11.1231	6.1914e-16	1.38837e-13	25.9904	0.412214	0.112415	-0.299799	17	32484008	R	II	ACCN1	TSS200	island	TSS200-island	chr17:32484007-32484280	NA	TRUE
cg26929355	-0.159988	0.654088	-11.1214	6.22915e-16	1.39449e-13	25.9843	0.734082	0.574094	-0.159988	16	69962827	F	I	WWP2	Body	opensea	Body-opensea		NA	TRUE		rs79993961
cg09578028	-0.412285	0.417422	-11.1201	6.25929e-16	1.40046e-13	25.9795	0.623565	0.21128	-0.412285	2	176987411	R	II	HOXD9	TSS200	island	TSS200-island	chr2:176986424-176988291	TRUE	TRUE
cg19911880	-0.150198	0.816558	-11.1195	6.27094e-16	1.40228e-13	25.9777	0.891657	0.741459	-0.150198	8	131353969	R	II	ASAP1	Body	opensea	Body-opensea		NA	TRUE
cg25247290	-0.298497	0.333059	-11.1192	6.27922e-16	1.40335e-13	25.9764	0.482308	0.18381	-0.298497	11	32461212	R	I	WIT1	Body	shore	Body-shore	chr11:32459422-32459878	NA	NA
cg24387864	0.225498	0.300987	11.114	6.3945e-16	1.42831e-13	25.9584	0.188238	0.413736	0.225498	11	69454823	F	II	CCND1	TSS1500	island	TSS1500-island	chr11:69451136-69458596	NA	NA
cg10601582	-0.360945	0.369096	-11.1096	6.49563e-16	1.4501e-13	25.9428	0.549568	0.188623	-0.360945	19	22605234	F	II	ZNF98	TSS200	opensea	TSS200-opensea		TRUE	NA
cg02330500	0.198809	0.184478	11.1059	6.58255e-16	1.46786e-13	25.9296	0.0850739	0.283883	0.198809	14	95731916	F	II	CLMN	Body	opensea	Body-opensea		TRUE	TRUE
cg27626299	-0.299016	0.272938	-11.1035	6.6378e-16	1.47772e-13	25.9213	0.422446	0.12343	-0.299016	7	27282431	F	II	EVX1	1stExon	island	1stExon-island	chr7:27282086-27283136	TRUE	NA		rs71659575
cg13820205	0.262629	0.605406	11.1031	6.64774e-16	1.47911e-13	25.9199	0.474092	0.736721	0.262629	9	132448040	R	II	PRRX2	Body	opensea	Body-opensea		TRUE	TRUE
cg07140497	-0.203044	0.684732	-11.1027	6.65601e-16	1.47931e-13	25.9186	0.786254	0.58321	-0.203044	12	113550113	F	I	RASAL1	Body	island	Body-island	chr12:113549885-113550165	NA	NA
cg01416712	-0.322723	0.420443	-11.1001	6.71943e-16	1.49257e-13	25.9092	0.581804	0.259081	-0.322723	4	41750864	R	II	PHOX2B	1stExon	shore	1stExon-shore	chr4:41752280-41752502	NA	NA	low-CpG:41445495-41445695
cg09656389	-0.301456	0.361907	-11.0998	6.72685e-16	1.49339e-13	25.9081	0.512635	0.211179	-0.301456	11	31839790	F	I	PAX6	TSS1500	island	TSS1500-island	chr11:31839363-31839813	NA	NA
cg10654803	-0.137498	0.858456	-11.0993	6.73786e-16	1.49501e-13	25.9065	0.927205	0.789707	-0.137498	5	41809936	R	II	OXCT1	Body	opensea	Body-opensea		NA	TRUE
cg11430718	0.169781	0.271302	11.0989	6.74622e-16	1.49604e-13	25.9053	0.186411	0.356192	0.169781	3	57113702	R	I	ARHGEF3	TSS1500	island	TSS1500-island	chr3:57112567-57113908	NA	NA
cg10696787	0.119011	0.222629	11.0985	6.75684e-16	1.49756e-13	25.9037	0.163124	0.282135	0.119011	17	65242740	R	I	HELZ	TSS1500	shore	TSS1500-shore	chr17:65240725-65242498	NA	NA
cg25212131	-0.159836	0.706844	-11.0964	6.80687e-16	1.50782e-13	25.8964	0.786762	0.626926	-0.159836	5	140683670	F	I	SLC25A2	TSS200	island	TSS200-island	chr5:140683195-140683773	NA	NA
cg15887459	-0.320856	0.466071	-11.0961	6.81534e-16	1.50803e-13	25.8952	0.626499	0.305644	-0.320856	11	18230903	R	II	LOC494141	Body	island	Body-island	chr11:18230619-18230906	NA	NA
cg01294808	-0.297522	0.54116	-11.0951	6.83859e-16	1.51234e-13	25.8918	0.689921	0.392399	-0.297522	5	3599686	R	I	IRX1	Body	island	Body-island	chr5:3594467-3603054	TRUE	NA			rs61745751
cg08202494	-0.251199	0.384247	-11.0923	6.90693e-16	1.52577e-13	25.8819	0.509847	0.258648	-0.251199	8	99961545	F	I	OSR2	Body	shore	Body-shore	chr8:99960497-99961438	NA	TRUE		rs76515796
cg24541426	-0.23935	0.393284	-11.0881	7.01127e-16	1.54796e-13	25.8671	0.512959	0.273609	-0.23935	2	177029459	R	I	HOXD3	5'UTR	island	5'UTR-island	chr2:177029413-177029941	NA	TRUE
cg15484532	-0.293819	0.236102	-11.0873	7.03173e-16	1.55077e-13	25.8642	0.383011	0.0891928	-0.293819	1	4714171	F	I	AJAP1	TSS1500	island	TSS1500-island	chr1:4713989-4716555	NA	NA			rs6689060
cg25426203	-0.125706	0.847738	-11.0864	7.05382e-16	1.55479e-13	25.8611	0.910591	0.784885	-0.125706	10	88600793	F	II	BMPR1A	5'UTR	opensea	5'UTR-opensea		NA	TRUE
cg07489502	-0.37429	0.322803	-11.0862	7.05796e-16	1.55484e-13	25.8605	0.509948	0.135658	-0.37429	5	140811642	F	I	PCDHGA4	Body	island	Body-island	chr5:140810494-140812617	NA	NA
cg04543289	-0.298638	0.368347	-11.0857	7.07141e-16	1.55695e-13	25.8586	0.517666	0.219028	-0.298638	16	24267559	R	II	CACNG3	1stExon	shore	1stExon-shore	chr16:24267040-24267527	TRUE	NA	high-CpG:24174975-24175218
cg09423283	-0.240844	0.29914	-11.0835	7.12627e-16	1.56817e-13	25.851	0.419562	0.178718	-0.240844	6	146755301	F	I	GRM1	3'UTR	shore	3'UTR-shore	chr6:146755475-146755901	NA	NA		rs6923492
cg02650767	0.271855	0.567916	11.083	7.1383e-16	1.56995e-13	25.8493	0.431989	0.703844	0.271855	1	247615210	F	II	OR2B11	1stExon	shore	1stExon-shore	chr1:247614695-247614944	NA	NA		rs12028142
cg14224444	0.271167	0.712478	11.0827	7.14613e-16	1.57081e-13	25.8482	0.576895	0.848061	0.271167	6	118587190	F	II	SLC35F1	Body	opensea	Body-opensea		NA	NA
cg05380821	-0.33848	0.293923	-11.0787	7.2486e-16	1.59246e-13	25.8341	0.463163	0.124682	-0.33848	6	108491108	R	II	NR2E1	Body	island	Body-island	chr6:108491033-108491410	NA	TRUE
cg13080379	-0.371969	0.38188	-11.0779	7.26928e-16	1.59613e-13	25.8313	0.567864	0.195895	-0.371969	1	119527156	R	II	TBX15	5'UTR	island	5'UTR-island	chr1:119526782-119527192	TRUE	NA
cg09618197	-0.105918	0.899685	-11.077	7.29172e-16	1.60018e-13	25.8282	0.952644	0.846726	-0.105918	6	5152468	R	II	LYRM4	Body	opensea	Body-opensea		TRUE	TRUE		rs450176
cg19361800	-0.218439	0.70417	-11.076	7.31957e-16	1.60541e-13	25.8244	0.81339	0.594951	-0.218439	2	208014177	F	II	KLF7	Body	opensea	Body-opensea		NA	TRUE
cg07631533	0.272309	0.545	11.0758	7.32458e-16	1.60563e-13	25.8237	0.408846	0.681155	0.272309	16	13135565	R	II	SHISA9	Body	opensea	Body-opensea		NA	TRUE
cg17501395	0.32319	0.385932	11.0725	7.4111e-16	1.62282e-13	25.8121	0.224337	0.547527	0.32319	6	149806331	R	II	ZC3H12D	TSS200	opensea	TSS200-opensea		NA	NA
cg15270654	-0.328866	0.294441	-11.0696	7.48826e-16	1.63882e-13	25.8018	0.458874	0.130007	-0.328866	8	97170666	F	II	GDF6	Body	shore	Body-shore	chr8:97171805-97172022	NA	NA
cg13477354	-0.179774	0.825016	-11.0692	7.49814e-16	1.64009e-13	25.8005	0.914903	0.735129	-0.179774	1	101705539	F	II	S1PR1	Body	shelf	Body-shelf	chr1:101701785-101702068	NA	NA
cg01493685	0.0830229	0.102834	11.0684	7.51924e-16	1.64368e-13	25.7977	0.0613221	0.144345	0.0830229	7	111375789	F	II	DOCK4	Body	opensea	Body-opensea		TRUE	TRUE			rs28516932
cg00368577	0.235653	0.630979	11.0682	7.52439e-16	1.64368e-13	25.7971	0.513152	0.748805	0.235653	12	52915064	R	II	KRT5	TSS1500	opensea	TSS1500-opensea		NA	NA
cg06974428	0.39601	0.662218	11.0681	7.52688e-16	1.64368e-13	25.7967	0.464213	0.860223	0.39601	10	22972299	R	II	PIP4K2A	Body	opensea	Body-opensea		NA	TRUE
cg05516390	0.280941	0.326002	11.0676	7.53982e-16	1.64562e-13	25.795	0.185532	0.466473	0.280941	16	73088677	R	II	ZFHX3	5'UTR	shelf	5'UTR-shelf	chr16:73091514-73092395	NA	TRUE			rs77476764
cg19017553	0.283999	0.524057	11.0673	7.54749e-16	1.64639e-13	25.794	0.382057	0.666057	0.283999	10	34817409	R	II	PARD3	Body	opensea	Body-opensea		NA	TRUE
cg01737026	-0.218181	0.327302	-11.0663	7.57563e-16	1.65163e-13	25.7903	0.436392	0.218211	-0.218181	6	101847656	F	I	GRIK2	Body	shore	Body-shore	chr6:101846766-101847135	NA	NA
cg01367005	0.168851	0.202618	11.0637	7.64456e-16	1.66485e-13	25.7814	0.118193	0.287043	0.168851	17	38518966	R	II	GJD3	1stExon	island	1stExon-island	chr17:38518965-38520264	NA	NA
cg19223299	-0.291394	0.229309	-11.0614	7.70743e-16	1.67763e-13	25.7732	0.375006	0.0836123	-0.291394	6	100057160	F	I	PRDM13	Body	shore	Body-shore	chr6:100055641-100055866	NA	NA
cg16964025	-0.312135	0.269317	-11.0612	7.71426e-16	1.6782e-13	25.7724	0.425384	0.11325	-0.312135	7	157482215	F	II	PTPRN2	Body	island	Body-island	chr7:157476886-157486719	NA	NA
cg23817893	-0.32964	0.286189	-11.0606	7.7313e-16	1.67923e-13	25.7702	0.451009	0.121369	-0.32964	11	86085932	R	I	CCDC81	1stExon	island	1stExon-island	chr11:86085693-86086006	NA	TRUE
cg08461425	-0.276207	0.597059	-11.0606	7.73154e-16	1.67923e-13	25.7701	0.735163	0.458956	-0.276207	12	121971790	F	II	KDM2B	Body	shelf	Body-shelf	chr12:121975028-121976140	NA	TRUE
cg25332717	0.267079	0.51839	11.0594	7.76318e-16	1.68519e-13	25.7661	0.38485	0.65193	0.267079	2	106020669	R	II	FHL2	5'UTR	opensea	5'UTR-opensea		TRUE	TRUE
cg11207307	-0.278695	0.40457	-11.0583	7.79439e-16	1.69104e-13	25.7621	0.543918	0.265222	-0.278695	12	8025593	R	I	SLC2A14	TSS200	island	TSS200-island	chr12:8025364-8025908	NA	NA
cg01031101	-0.312064	0.38292	-11.0577	7.811e-16	1.69373e-13	25.76	0.538952	0.226888	-0.312064	6	28227091	F	I	NKAPL	TSS200	island	TSS200-island	chr6:28226979-28227483	NA	NA	high-CpG:28335047-28335084
cg13153865	0.149861	0.180889	11.057	7.83097e-16	1.69714e-13	25.7575	0.105958	0.255819	0.149861	8	90914101	F	II	OSGIN2	5'UTR	shore	5'UTR-shore	chr8:90914197-90915340	TRUE	NA
cg19352038	-0.327405	0.512825	-11.0561	7.85386e-16	1.70051e-13	25.7546	0.676527	0.349122	-0.327405	2	223164869	F	II	PAX3	TSS1500	shore	TSS1500-shore	chr2:223162946-223163912	NA	TRUE		rs45506598
cg09672383	-0.290387	0.525856	-11.0561	7.855e-16	1.70051e-13	25.7544	0.67105	0.380663	-0.290387	2	25390540	R	II	POMC	5'UTR	shore	5'UTR-shore	chr2:25391072-25391875	NA	NA
cg17187764	0.288969	0.746173	11.0557	7.86535e-16	1.70183e-13	25.7531	0.601688	0.890657	0.288969	12	7818654	F	II	APOBEC1	TSS200	opensea	TSS200-opensea		NA	NA
cg00197058	-0.282451	0.591497	-11.0549	7.88965e-16	1.70617e-13	25.7501	0.732723	0.450272	-0.282451	17	59554672	R	II	TBX4	Body	opensea	Body-opensea		NA	NA
cg10415509	0.289939	0.579583	11.0541	7.91004e-16	1.70966e-13	25.7475	0.434613	0.724552	0.289939	21	46876904	R	I	COL18A1	Body	shore	Body-shore	chr21:46876168-46876752	NA	NA
cg16178603	-0.322858	0.26218	-11.0538	7.92055e-16	1.71101e-13	25.7462	0.423609	0.100751	-0.322858	2	66667101	R	I	MEIS1	Body	opensea	Body-opensea		NA	NA
cg06491116	0.150881	0.130373	11.0533	7.93444e-16	1.71308e-13	25.7445	0.0549329	0.205813	0.150881	11	118122715	R	II	MPZL3	Body	opensea	Body-opensea		TRUE	NA
cg27321175	0.302001	0.681259	11.0507	8.00817e-16	1.72528e-13	25.7353	0.530258	0.83226	0.302001	10	15689009	R	II	ITGA8	Body	opensea	Body-opensea		NA	NA
cg03547062	0.245204	0.707028	11.0495	8.04046e-16	1.73131e-13	25.7313	0.584426	0.829631	0.245204	11	393606	R	I	PKP3	TSS1500	shore	TSS1500-shore	chr11:394257-394619	NA	TRUE
cg26875665	-0.196335	0.703869	-11.0466	8.12493e-16	1.74574e-13	25.7209	0.802037	0.605702	-0.196335	1	160340708	R	II	NHLH1	Body	island	Body-island	chr1:160340604-160340843	NA	NA
cg23669081	-0.349607	0.574556	-11.0412	8.28157e-16	1.77654e-13	25.702	0.74936	0.399752	-0.349607	17	46685353	R	I	HOXB7	Body	island	Body-island	chr17:46685244-46685449	NA	NA		rs1042216	rs62637586
cg00388812	-0.278314	0.525826	-11.0409	8.29072e-16	1.77755e-13	25.7009	0.664983	0.386669	-0.278314	8	99961376	R	II	OSR2	Body	island	Body-island	chr8:99960497-99961438	NA	TRUE
cg13904520	0.354894	0.729248	11.0403	8.30759e-16	1.78022e-13	25.6989	0.551801	0.906694	0.354894	1	160783054	R	II	LY9	Body	opensea	Body-opensea		NA	NA
cg05603527	-0.265593	0.414241	-11.0398	8.32398e-16	1.78278e-13	25.6969	0.547038	0.281444	-0.265593	2	71131629	R	I	VAX2	Body	island	Body-island	chr2:71131200-71132256	NA	NA
cg07907386	-0.31809	0.282527	-11.0391	8.34293e-16	1.78583e-13	25.6947	0.441572	0.123482	-0.31809	4	41749443	R	I	PHOX2B	Body	island	Body-island	chr4:41749184-41749811	NA	TRUE
cg14742937	-0.307609	0.469644	-11.039	8.34716e-16	1.78583e-13	25.6942	0.623449	0.315839	-0.307609	8	39172097	F	I	ADAM5P	TSS200	opensea	TSS200-opensea		NA	NA
cg23665216	-0.13316	0.786216	-11.0386	8.35994e-16	1.78761e-13	25.6927	0.852796	0.719636	-0.13316	14	105916422	F	I	MTA1	Body	shore	Body-shore	chr14:105915521-105915931	NA	NA
cg12661262	-0.0762509	0.896684	-11.0379	8.38138e-16	1.79114e-13	25.6901	0.934809	0.858558	-0.0762509	6	21691612	R	II	FLJ22536	Body	opensea	Body-opensea		NA	TRUE
cg14371731	-0.381871	0.25261	-11.0306	8.59918e-16	1.83304e-13	25.6647	0.443545	0.0616746	-0.381871	10	81003175	R	I	ZMIZ1	Body	island	Body-island	chr10:81002109-81003687	NA	NA	high-CpG:80671837-80673385
cg24366168	-0.256073	0.70977	-11.0305	8.60408e-16	1.83304e-13	25.6641	0.837807	0.581733	-0.256073	19	3097712	R	I	GNA11	Body	island	Body-island	chr19:3097564-3097793	NA	TRUE
cg03199745	-0.20324	0.569693	-11.0305	8.60442e-16	1.83304e-13	25.6641	0.671314	0.468073	-0.20324	12	54454445	F	I	FLJ12825	Body	island	Body-island	chr12:54454249-54454458	NA	TRUE
cg03791074	-0.144467	0.866528	-11.0301	8.61509e-16	1.83406e-13	25.6629	0.938762	0.794294	-0.144467	7	1117852	R	II	C7orf50	Body	shelf	Body-shelf	chr7:1119980-1120248	NA	NA
cg02609692	-0.329893	0.333923	-11.0269	8.71553e-16	1.85277e-13	25.6514	0.498869	0.168977	-0.329893	9	129389125	R	II	LMX1B	Body	island	Body-island	chr9:129386112-129389231	NA	NA
cg27606499	-0.314964	0.307751	-11.0214	8.88697e-16	1.88323e-13	25.6321	0.465233	0.150269	-0.314964	3	147111120	F	I	ZIC4	Body	island	Body-island	chr3:147108511-147111703	TRUE	TRUE
cg22984992	0.112639	0.204518	11.0193	8.95324e-16	1.89331e-13	25.6247	0.148199	0.260838	0.112639	19	13056423	F	I	RAD23A	TSS1500	shore	TSS1500-shore	chr19:13056458-13057125	NA	NA
cg02952295	0.335612	0.652768	11.0193	8.95346e-16	1.89331e-13	25.6247	0.484962	0.820574	0.335612	2	234913188	F	II	TRPM8	Body	opensea	Body-opensea		TRUE	TRUE			rs75668105
cg10184983	-0.375944	0.229546	-11.0178	9.00261e-16	1.9027e-13	25.6192	0.417519	0.0415743	-0.375944	17	36734911	F	I	SRCIN1	Body	island	Body-island	chr17:36734659-36735246	NA	TRUE		rs34134205
cg08206318	-0.342033	0.459551	-11.0161	9.05494e-16	1.91275e-13	25.6135	0.630567	0.288534	-0.342033	5	134363637	F	II	PITX1	3'UTR	island	3'UTR-island	chr5:134363092-134365146	NA	TRUE		rs1051294
cg00394823	0.20171	0.265486	11.0158	9.06631e-16	1.91414e-13	25.6123	0.164631	0.366341	0.20171	16	20775166	R	II	ACSM3	TSS200	opensea	TSS200-opensea		TRUE	TRUE
cg19216792	-0.304287	0.422248	-11.0154	9.07823e-16	1.91565e-13	25.611	0.574391	0.270104	-0.304287	7	26897202	F	II	SKAP2	Body	opensea	Body-opensea		NA	NA
cg21648069	-0.21622	0.675041	-11.015	9.09147e-16	1.91642e-13	25.6095	0.783151	0.566932	-0.21622	12	1157718	F	II	ERC1	Body	opensea	Body-opensea		NA	TRUE
cg01295392	-0.364469	0.436317	-11.0148	9.09717e-16	1.91662e-13	25.6089	0.618551	0.254082	-0.364469	12	108169569	F	II	ASCL4	1stExon	island	1stExon-island	chr12:108168986-108169570	NA	TRUE
cg11926444	-0.125818	0.818269	-11.0139	9.12598e-16	1.92067e-13	25.6058	0.881178	0.75536	-0.125818	3	119137289	F	I	CDGAP	3'UTR	opensea	3'UTR-opensea		NA	NA
cg20710709	-0.302598	0.488947	-11.0118	9.19667e-16	1.93453e-13	25.5981	0.640246	0.337647	-0.302598	14	37135671	F	II	PAX9	Body	island	Body-island	chr14:37135513-37136348	NA	NA
cg13324546	-0.283639	0.201847	-11.0114	9.20723e-16	1.93573e-13	25.597	0.343666	0.0600275	-0.283639	8	23564031	R	I	NKX2-6	TSS200	island	TSS200-island	chr8:23562475-23565175	NA	TRUE
cg02297801	0.222424	0.344412	11.0104	9.24254e-16	1.94011e-13	25.5932	0.233201	0.455624	0.222424	1	1710663	R	II	NADK	TSS1500	shore	TSS1500-shore	chr1:1709394-1710582	NA	NA
cg09310092	-0.298856	0.532117	-11.0063	9.37644e-16	1.96615e-13	25.5789	0.681545	0.382689	-0.298856	19	35529201	R	II	SCN1B	Body	shelf	Body-shelf	chr19:35531780-35531991	TRUE	NA
cg12475507	-0.261207	0.583963	-11.0044	9.44179e-16	1.97779e-13	25.572	0.714566	0.453359	-0.261207	1	3567852	R	II	TP73	TSS1500	island	TSS1500-island	chr1:3566445-3569636	NA	NA
cg25641145	0.221331	0.3266	11.0019	9.52388e-16	1.99394e-13	25.5634	0.215934	0.437265	0.221331	8	101572366	R	II	ANKRD46	TSS1500	shore	TSS1500-shore	chr8:101571515-101572104	NA	NA
cg17840501	-0.231465	0.576604	-10.997	9.69236e-16	2.02815e-13	25.5461	0.692336	0.460872	-0.231465	17	75385086	F	II	2019-09-09	5'UTR	opensea	5'UTR-opensea		TRUE	TRUE
cg17080423	-0.300278	0.307707	-10.9965	9.71201e-16	2.0312e-13	25.5441	0.457846	0.157568	-0.300278	4	81189774	F	II	FGF5	Body	shore	Body-shore	chr4:81187494-81187913	NA	NA		rs36095121
cg25541653	0.303889	0.609623	10.9956	9.74195e-16	2.03604e-13	25.541	0.457678	0.761568	0.303889	11	30582012	R	II	MPPED2	Body	opensea	Body-opensea		NA	TRUE
cg10761843	-0.101518	0.892182	-10.9953	9.75036e-16	2.03604e-13	25.5401	0.942941	0.841422	-0.101518	2	172411765	F	II	CYBRD1	3'UTR	opensea	3'UTR-opensea		NA	NA
cg18729001	-0.301782	0.597039	-10.9949	9.7645e-16	2.03737e-13	25.5387	0.74793	0.446148	-0.301782	12	45443808	F	II	DBX2	Body	shore	Body-shore	chr12:45444202-45445386	NA	NA		rs11182809
cg04462652	0.154581	0.157694	10.9948	9.77047e-16	2.03737e-13	25.5381	0.0804031	0.234984	0.154581	2	133429088	R	II	LYPD1	TSS1500	shore	TSS1500-shore	chr2:133426652-133428870	TRUE	NA
cg16988810	0.196317	0.257679	10.9947	9.77199e-16	2.03737e-13	25.538	0.15952	0.355837	0.196317	6	31762650	F	II	VARS	Body	shore	Body-shore	chr6:31763240-31763905	NA	NA
cg20716202	0.275033	0.745027	10.9941	9.79431e-16	2.04096e-13	25.5357	0.60751	0.882543	0.275033	11	2925847	F	II	SLC22A18	Body	shelf	Body-shelf	chr11:2923301-2923817	NA	TRUE
cg15935247	-0.143796	0.734755	-10.9935	9.81341e-16	2.04388e-13	25.5338	0.806653	0.662857	-0.143796	17	56606842	F	II	2019-09-04	TSS200	shelf	TSS200-shelf	chr17:56609025-56609583	NA	NA
cg15610488	-0.100492	0.884119	-10.9928	9.83957e-16	2.04826e-13	25.5311	0.934364	0.833873	-0.100492	13	113492103	F	II	ATP11A	Body	shore	Body-shore	chr13:113492486-113492836	NA	NA		rs11839077
cg14535980	-0.253693	0.353713	-10.9918	9.87328e-16	2.05315e-13	25.5277	0.480559	0.226866	-0.253693	2	106681937	F	I	C2orf40	TSS200	shore	TSS200-shore	chr2:106681982-106682403	NA	TRUE
cg08113562	0.217759	0.183644	10.99	9.93855e-16	2.06565e-13	25.5212	0.0747646	0.292523	0.217759	17	43508428	F	II	SH3D20	5'UTR	island	5'UTR-island	chr17:43506828-43510380	NA	NA
cg12215739	-0.36955	0.49387	-10.9893	9.96141e-16	2.06825e-13	25.5189	0.678645	0.309094	-0.36955	2	177014966	R	II	HOXD4	TSS1500	island	TSS1500-island	chr2:177014948-177015214	NA	NA
cg13184448	-0.175403	0.810387	-10.9879	1.00134e-15	2.07632e-13	25.5138	0.898089	0.722686	-0.175403	2	238647857	R	II	LRRFIP1	Body	shelf	Body-shelf	chr2:238643905-238644109	NA	NA
cg11700800	-0.318822	0.398905	-10.9878	1.00158e-15	2.07632e-13	25.5135	0.558316	0.239494	-0.318822	5	92906633	F	II	FLJ42709	Body	island	Body-island	chr5:92906239-92908875	NA	NA
cg24000908	0.288667	0.580872	10.9859	1.0084e-15	2.0883e-13	25.5068	0.436538	0.725205	0.288667	5	1113358	F	II	SLC12A7	TSS1500	shore	TSS1500-shore	chr5:1111396-1112388	NA	NA
cg17627328	0.357309	0.655797	10.9855	1.00977e-15	2.08898e-13	25.5054	0.477143	0.834452	0.357309	5	5146343	F	I	ADAMTS16	Body	opensea	Body-opensea		NA	NA		rs1019747
cg03705912	-0.373869	0.377951	-10.9849	1.01213e-15	2.09255e-13	25.5031	0.564885	0.191017	-0.373869	5	16179210	R	II	2019-03-11	1stExon	island	1stExon-island	chr5:16179064-16180420	TRUE	NA
cg26422656	-0.0931771	0.873302	-10.9848	1.01254e-15	2.09255e-13	25.5027	0.91989	0.826713	-0.0931771	2	238585054	R	II	LRRFIP1	Body	opensea	Body-opensea		NA	TRUE
cg15095917	0.272171	0.377485	10.9835	1.01705e-15	2.0993e-13	25.4983	0.241399	0.513571	0.272171	17	7482694	F	II	CD68	TSS200	shelf	TSS200-shelf	chr17:7486285-7487431	TRUE	NA		rs36005070
cg14197071	-0.328895	0.59188	-10.9823	1.0215e-15	2.10671e-13	25.494	0.756327	0.427432	-0.328895	4	81110459	F	II	PRDM8	5'UTR	island	5'UTR-island	chr4:81109887-81110460	NA	NA
cg00134210	0.197138	0.175206	10.977	1.04086e-15	2.14423e-13	25.4754	0.0766366	0.273774	0.197138	10	14644132	R	II	FAM107B	Body	shore	Body-shore	chr10:14645752-14646705	TRUE	NA
cg19489494	-0.222759	0.595114	-10.9769	1.0413e-15	2.14423e-13	25.475	0.706494	0.483735	-0.222759	6	42146143	R	II	GUCA1A	Body	shore	Body-shore	chr6:42145847-42146053	NA	NA
cg09044294	0.285269	0.755963	10.9759	1.04501e-15	2.14951e-13	25.4714	0.613329	0.898598	0.285269	2	50234533	R	II	NRXN1	Body	opensea	Body-opensea		NA	TRUE
cg24842086	-0.361963	0.380143	-10.9755	1.04659e-15	2.15072e-13	25.4699	0.561125	0.199162	-0.361963	1	119531857	R	II	TBX15	5'UTR	shore	5'UTR-shore	chr1:119531991-119532196	NA	TRUE		rs12568216
cg24599709	0.286643	0.766781	10.9742	1.05127e-15	2.15922e-13	25.4655	0.62346	0.910102	0.286643	2	26578508	F	II	SELI	Body	opensea	Body-opensea		NA	TRUE
cg00901320	-0.375605	0.325352	-10.9712	1.06268e-15	2.17935e-13	25.4548	0.513155	0.13755	-0.375605	12	129338534	R	II	GLT1D1	Body	island	Body-island	chr12:129337870-129338653	NA	NA
cg26094789	-0.270424	0.469513	-10.9712	1.0627e-15	2.17935e-13	25.4548	0.604725	0.334302	-0.270424	14	37135586	R	I	PAX9	Body	island	Body-island	chr14:37135513-37136348	NA	NA
cg06148812	-0.334737	0.469506	-10.9688	1.07177e-15	2.1957e-13	25.4464	0.636875	0.302138	-0.334737	22	19746368	F	II	TBX1	5'UTR	island	5'UTR-island	chr22:19746155-19746369	NA	TRUE
cg20265661	0.131195	0.124964	10.9685	1.07295e-15	2.19699e-13	25.4453	0.0593666	0.190562	0.131195	2	133428502	F	I	LYPD1	TSS200	island	TSS200-island	chr2:133426652-133428870	TRUE	NA
cg06809252	-0.388677	0.358468	-10.9662	1.08189e-15	2.21303e-13	25.4371	0.552807	0.164129	-0.388677	1	110612044	R	I	ALX3	Body	island	Body-island	chr1:110610265-110613303	NA	NA
cg22105145	-0.282323	0.261864	-10.9657	1.08349e-15	2.21518e-13	25.4356	0.403026	0.120703	-0.282323	18	5196397	F	II	LOC642597	Body	island	Body-island	chr18:5196243-5197389	NA	TRUE
cg17243289	0.21137	0.348052	10.9651	1.0861e-15	2.21938e-13	25.4332	0.242366	0.453737	0.21137	18	45458021	F	II	SMAD2	TSS1500	island	TSS1500-island	chr18:45456484-45458024	NA	NA
cg11946503	-0.268829	0.303797	-10.9605	1.10398e-15	2.25134e-13	25.417	0.438211	0.169382	-0.268829	5	134870514	F	I	NEUROG1	1stExon	shore	1stExon-shore	chr5:134870740-134872051	NA	NA		rs35758773
cg22305258	0.1771	0.167467	10.9586	1.1114e-15	2.26449e-13	25.4104	0.078917	0.256017	0.1771	17	4643367	R	I	CXCL16	TSS200	island	TSS200-island	chr17:4642038-4643410	NA	NA
cg20935317	-0.12143	0.865225	-10.9586	1.11156e-15	2.26449e-13	25.4102	0.92594	0.80451	-0.12143	1	10739184	F	II	CASZ1	Body	opensea	Body-opensea		NA	NA
cg17786697	-0.249272	0.49373	-10.9567	1.11883e-15	2.27814e-13	25.4038	0.618366	0.369094	-0.249272	5	122430509	R	II	PRDM6	Body	shore	Body-shore	chr5:122430676-122431443	NA	TRUE
cg07569216	-0.333125	0.446331	-10.9565	1.11989e-15	2.27913e-13	25.4028	0.612893	0.279768	-0.333125	15	53075533	F	II	ONECUT1	Body	shore	Body-shore	chr15:53076187-53077926	TRUE	NA
cg14562054	0.244846	0.598366	10.9561	1.12134e-15	2.27978e-13	25.4015	0.475944	0.720789	0.244846	11	66104485	F	II	RIN1	TSS1500	shelf	TSS1500-shelf	chr11:66102024-66102279	NA	NA
cg06672560	-0.271731	0.246546	-10.9561	1.12135e-15	2.27978e-13	25.4015	0.382411	0.110681	-0.271731	20	54580175	R	II	CBLN4	TSS200	island	TSS200-island	chr20:54578603-54580678	NA	NA
cg15781573	-0.0725673	0.909087	-10.9538	1.13058e-15	2.29622e-13	25.3934	0.945371	0.872803	-0.0725673	3	45550104	R	II	LARS2	Body	opensea	Body-opensea		NA	TRUE
cg06466839	0.266853	0.668672	10.9529	1.13426e-15	2.30137e-13	25.3902	0.535245	0.802099	0.266853	11	129062277	R	II	RICS	TSS200	opensea	TSS200-opensea		NA	NA
cg04002220	-0.131129	0.821758	-10.9518	1.13888e-15	2.30958e-13	25.3862	0.887323	0.756194	-0.131129	16	89598305	R	II	SPG7	Body	opensea	Body-opensea		NA	NA
cg00351537	-0.165339	0.785002	-10.9503	1.14479e-15	2.32039e-13	25.381	0.867672	0.702332	-0.165339	19	7580275	F	II	ZNF358	TSS1500	shore	TSS1500-shore	chr19:7580824-7581415	NA	NA
cg16773741	-0.118208	0.85352	-10.9462	1.16186e-15	2.35134e-13	25.3664	0.912624	0.794416	-0.118208	22	19513017	F	II	CLDN5	TSS200	shore	TSS200-shore	chr22:19510871-19512254	NA	NA
cg11804928	-0.363529	0.338166	-10.946	1.16241e-15	2.35134e-13	25.3659	0.51993	0.156401	-0.363529	17	38220298	F	II	THRA	5'UTR	shore	5'UTR-shore	chr17:38219084-38219880	TRUE	NA
cg01378515	-0.184931	0.748772	-10.9433	1.17362e-15	2.37282e-13	25.3564	0.841237	0.656306	-0.184931	3	124773106	R	II	HEG1	Body	shore	Body-shore	chr3:124774246-124775113	NA	NA
cg21290814	0.285967	0.459836	10.9408	1.18429e-15	2.39318e-13	25.3474	0.316852	0.602819	0.285967	19	18793853	R	II	CRTC1	TSS1500	shore	TSS1500-shore	chr19:18794191-18794819	NA	NA
cg25720804	-0.351586	0.294035	-10.9395	1.18979e-15	2.40186e-13	25.3428	0.469828	0.118241	-0.351586	5	170736389	F	I	TLX3	1stExon	island	1stExon-island	chr5:170735169-170739863	NA	TRUE
cg08464190	-0.33308	0.230199	-10.9384	1.19462e-15	2.41041e-13	25.3388	0.396739	0.0636589	-0.33308	16	49315302	F	I	CBLN1	1stExon	island	1stExon-island	chr16:49314037-49316543	NA	TRUE
cg12496211	0.302494	0.537735	10.938	1.19632e-15	2.41262e-13	25.3374	0.386487	0.688982	0.302494	12	2193060	F	II	CACNA1C	Body	opensea	Body-opensea		NA	TRUE
cg12140851	-0.353895	0.454136	-10.9377	1.19738e-15	2.41355e-13	25.3365	0.631084	0.277189	-0.353895	7	26897612	R	II	SKAP2	Body	opensea	Body-opensea		NA	TRUE			rs35818880
cg22188918	-0.137127	0.68195	-10.9374	1.19871e-15	2.41501e-13	25.3354	0.750513	0.613386	-0.137127	7	100882175	F	I	CLDN15	TSS1500	opensea	TSS1500-opensea		NA	TRUE		rs12532195
cg17434154	-0.214589	0.723055	-10.937	1.20069e-15	2.41715e-13	25.3338	0.830349	0.61576	-0.214589	1	217306590	R	II	ESRRG	5'UTR	shore	5'UTR-shore	chr1:217307744-217309179	NA	NA
cg09117114	-0.198274	0.571448	-10.9369	1.20098e-15	2.41715e-13	25.3335	0.670585	0.472311	-0.198274	16	67998030	R	I	SLC12A4	Body	shelf	Body-shelf	chr16:68001916-68002462	NA	NA
cg07195577	0.238318	0.201269	10.9363	1.20336e-15	2.42073e-13	25.3316	0.0821101	0.320428	0.238318	17	27052828	R	II	TLCD1	Body	shore	Body-shore	chr17:27052941-27054084	NA	NA
cg19942495	-0.330554	0.430345	-10.9357	1.20622e-15	2.42527e-13	25.3292	0.595622	0.265068	-0.330554	17	32484027	R	II	ACCN1	TSS1500	island	TSS1500-island	chr17:32484007-32484280	NA	TRUE
cg02773433	-0.193258	0.378714	-10.9348	1.20994e-15	2.43031e-13	25.3261	0.475343	0.282085	-0.193258	11	94133505	R	I	GPR83	Body	shore	Body-shore	chr11:94134226-94134848	NA	NA
cg13358636	-0.274236	0.262875	-10.9346	1.2109e-15	2.43101e-13	25.3254	0.399993	0.125757	-0.274236	2	124782263	R	I	CNTNAP5	TSS1500	island	TSS1500-island	chr2:124782252-124783255	NA	NA
cg13595913	-0.160657	0.80942	-10.9315	1.22411e-15	2.45507e-13	25.3146	0.889748	0.729091	-0.160657	9	5786038	R	II	ERMP1	3'UTR	opensea	3'UTR-opensea		NA	TRUE
cg25130381	-0.159291	0.700369	-10.9307	1.22764e-15	2.46092e-13	25.3118	0.780014	0.620724	-0.159291	1	27440721	F	I	SLC9A1	Body	opensea	Body-opensea		NA	NA
cg00466334	-0.241545	0.603145	-10.9281	1.23926e-15	2.48173e-13	25.3024	0.723917	0.482372	-0.241545	1	119532850	F	II	TBX15	TSS1500	shore	TSS1500-shore	chr1:119531991-119532196	NA	NA
cg24061208	-0.341832	0.359255	-10.9268	1.245e-15	2.49074e-13	25.2978	0.530171	0.188339	-0.341832	18	14748250	R	II	ANKRD30B	1stExon	shore	1stExon-shore	chr18:14747516-14748231	NA	NA
cg26753302	0.308046	0.674344	10.9268	1.245e-15	2.49074e-13	25.2978	0.520321	0.828366	0.308046	18	61143993	F	II	SERPINB5	TSS200	opensea	TSS200-opensea		NA	NA		rs3744940
cg06226384	0.229393	0.568251	10.9251	1.25258e-15	2.50466e-13	25.2918	0.453555	0.682948	0.229393	17	64873351	R	II	CACNG5	TSS200	opensea	TSS200-opensea		NA	NA
cg05756029	-0.281385	0.499712	-10.9248	1.25414e-15	2.50653e-13	25.2906	0.640404	0.359019	-0.281385	11	18230754	R	I	LOC494141	Body	island	Body-island	chr11:18230619-18230906	NA	NA
cg13541527	0.243295	0.372323	10.92	1.27554e-15	2.54676e-13	25.2738	0.250675	0.493971	0.243295	6	31804078	F	II	C6orf48	5'UTR	shore	5'UTR-shore	chr6:31802598-31802823	NA	NA
cg10055501	-0.323399	0.330474	-10.9181	1.28406e-15	2.56121e-13	25.2672	0.492173	0.168774	-0.323399	4	111540657	F	I	PITX2	Body	shore	Body-shore	chr4:111542062-111544464	NA	TRUE			rs72894277
cg19080053	-0.32015	0.456709	-10.9135	1.30559e-15	2.59639e-13	25.2507	0.616784	0.296635	-0.32015	6	5132887	F	II	LYRM4	3'UTR	shelf	3'UTR-shelf	chr6:5135172-5135795	NA	TRUE
cg01503065	-0.306089	0.296091	-10.9132	1.30674e-15	2.5974e-13	25.2498	0.449135	0.143047	-0.306089	4	155411806	R	II	DCHS2	1stExon	island	1stExon-island	chr4:155410623-155413393	TRUE	NA
cg08523865	-0.296534	0.368963	-10.9124	1.31079e-15	2.60416e-13	25.2468	0.51723	0.220696	-0.296534	2	124782253	R	II	CNTNAP5	TSS1500	island	TSS1500-island	chr2:124782252-124783255	NA	NA
cg07452625	-0.148646	0.837928	-10.9112	1.31628e-15	2.61377e-13	25.2426	0.912251	0.763604	-0.148646	16	89598568	R	II	SPG7	Body	opensea	Body-opensea		NA	NA
cg11202871	-0.160077	0.727089	-10.9104	1.32026e-15	2.62037e-13	25.2396	0.807128	0.647051	-0.160077	7	134851177	R	II	C7orf49	Body	shelf	Body-shelf	chr7:134854975-134855696	NA	NA
cg25368586	0.24194	0.755733	10.9092	1.32588e-15	2.62793e-13	25.2354	0.634763	0.876703	0.24194	13	111561018	F	II	ANKRD10	Body	opensea	Body-opensea		NA	TRUE
cg09171112	0.274588	0.585865	10.9091	1.32604e-15	2.62793e-13	25.2353	0.448571	0.723159	0.274588	5	166711594	F	II	ODZ2	TSS1500	opensea	TSS1500-opensea		NA	NA
cg25235068	0.234805	0.334663	10.9077	1.33301e-15	2.63914e-13	25.2301	0.217261	0.452066	0.234805	8	21642319	F	II	GFRA2	Body	shore	Body-shore	chr8:21640161-21640365	NA	NA
cg04472592	0.215477	0.577792	10.9075	1.33399e-15	2.63979e-13	25.2294	0.470053	0.685531	0.215477	12	52585786	R	II	KRT80	TSS200	opensea	TSS200-opensea		TRUE	TRUE
cg08705647	-0.205743	0.682128	-10.9069	1.33654e-15	2.64351e-13	25.2275	0.785	0.579256	-0.205743	5	132608124	F	I	FSTL4	Body	opensea	Body-opensea		NA	NA
cg22643751	0.227349	0.248906	10.9066	1.33808e-15	2.64526e-13	25.2263	0.135232	0.36258	0.227349	7	855365	F	I	UNC84A	TSS1500	island	TSS1500-island	chr7:855308-856747	NA	NA
cg22370006	-0.349342	0.275996	-10.904	1.35083e-15	2.66782e-13	25.2169	0.450667	0.101325	-0.349342	6	154360344	R	II	OPRM1	TSS200	shore	TSS200-shore	chr6:154360586-154361008	NA	NA
cg05662655	0.203749	0.766157	10.9027	1.35691e-15	2.6779e-13	25.2125	0.664282	0.868031	0.203749	18	28682828	F	II	DSC2	TSS1500	shore	TSS1500-shore	chr18:28681320-28682455	NA	NA
cg18397073	-0.317037	0.601614	-10.9012	1.36437e-15	2.69059e-13	25.2071	0.760133	0.443096	-0.317037	19	42600278	R	I	POU2F2	Body	island	Body-island	chr19:42599507-42600522	NA	NA
cg00355019	0.304815	0.712014	10.9005	1.36774e-15	2.69592e-13	25.2046	0.559607	0.864421	0.304815	11	119994877	F	I	TRIM29	Body	opensea	Body-opensea		NA	NA		rs2084896
cg19716643	-0.340497	0.334182	-10.8984	1.37777e-15	2.71434e-13	25.1974	0.504431	0.163934	-0.340497	14	52735026	F	II	PTGDR	1stExon	island	1stExon-island	chr14:52734207-52735486	NA	TRUE		rs41407349
cg21459713	-0.135799	0.758995	-10.8979	1.38043e-15	2.71825e-13	25.1955	0.826894	0.691096	-0.135799	8	623688	F	I	ERICH1	Body	island	Body-island	chr8:623372-623710	NA	NA			rs61741834
cg04548856	-0.381931	0.304749	-10.897	1.38504e-15	2.72599e-13	25.1921	0.495715	0.113784	-0.381931	14	57284528	R	II	OTX2OS1	Body	island	Body-island	chr14:57283967-57284558	NA	NA
cg25596287	0.270003	0.474312	10.892	1.40958e-15	2.77021e-13	25.1747	0.33931	0.609313	0.270003	1	28843736	F	II	SNHG3-RCC1	Body	shore	Body-shore	chr1:28844653-28845293	NA	NA		rs12239131
cg05616355	0.279541	0.643215	10.8918	1.41058e-15	2.77082e-13	25.174	0.503444	0.782986	0.279541	11	124480990	R	II	PANX3	TSS1500	opensea	TSS1500-opensea		NA	NA
cg16925459	0.348695	0.481049	10.8914	1.41283e-15	2.77387e-13	25.1725	0.306701	0.655397	0.348695	7	18548581	R	II	HDAC9	Body	opensea	Body-opensea		NA	TRUE
cg18148375	0.271947	0.627299	10.8903	1.41822e-15	2.78173e-13	25.1687	0.491325	0.763272	0.271947	2	1926535	R	I	MYT1L	Body	opensea	Body-opensea		NA	NA
cg13954457	-0.351184	0.346846	-10.8891	1.42444e-15	2.7912e-13	25.1643	0.522438	0.171254	-0.351184	5	167956819	R	I	FBLL1	Body	island	Body-island	chr5:167956219-167957371	TRUE	NA
cg06488443	-0.313796	0.338531	-10.886	1.44047e-15	2.82122e-13	25.1532	0.495428	0.181633	-0.313796	2	162280341	F	II	TBR1	Body	island	Body-island	chr2:162279835-162280709	NA	TRUE
cg06710785	0.289144	0.750213	10.8854	1.44359e-15	2.82596e-13	25.1511	0.605641	0.894786	0.289144	10	83683829	R	II	NRG3	Body	opensea	Body-opensea		NA	NA
cg20624923	-0.324121	0.429304	-10.8845	1.44815e-15	2.83351e-13	25.148	0.591365	0.267244	-0.324121	10	120355427	R	II	PRLHR	TSS1500	island	TSS1500-island	chr10:120353692-120355821	TRUE	TRUE
cg05050042	-0.283884	0.539062	-10.8843	1.44891e-15	2.8336e-13	25.1475	0.681004	0.39712	-0.283884	4	154711563	R	I	SFRP2	TSS1500	shore	TSS1500-shore	chr4:154712073-154712706	NA	NA
cg11151402	-0.0919821	0.877053	-10.882	1.46104e-15	2.85594e-13	25.1392	0.923044	0.831062	-0.0919821	5	159820339	R	II	C5orf54	3'UTR	opensea	3'UTR-opensea		NA	NA
cg05380734	-0.1676	0.615805	-10.8794	1.4747e-15	2.88124e-13	25.13	0.699606	0.532005	-0.1676	17	76814805	F	II	USP36	Body	opensea	Body-opensea		NA	NA
cg08596532	0.291319	0.528338	10.8786	1.47909e-15	2.88839e-13	25.127	0.382678	0.673997	0.291319	5	5033993	R	II	LOC340094	TSS1500	opensea	TSS1500-opensea		NA	NA
cg27435498	-0.233446	0.413987	-10.8755	1.49536e-15	2.9159e-13	25.1162	0.53071	0.297264	-0.233446	7	150655387	F	I	KCNH2	Body	island	Body-island	chr7:150655108-150655643	NA	NA
cg01492538	-0.179715	0.737204	-10.8754	1.49625e-15	2.91623e-13	25.1156	0.827062	0.647346	-0.179715	7	2774543	R	II	GNA12	Body	island	Body-island	chr7:2774444-2774655	NA	NA
cg05864326	-0.315256	0.416646	-10.8747	1.49951e-15	2.91974e-13	25.1134	0.574275	0.259018	-0.315256	2	177030150	R	I	HOXD3	5'UTR	shore	5'UTR-shore	chr2:177029413-177029941	NA	NA
cg11178293	-0.255962	0.556748	-10.873	1.50913e-15	2.93705e-13	25.1071	0.684729	0.428767	-0.255962	3	62355505	F	II	FEZF2	3'UTR	island	3'UTR-island	chr3:62355315-62355534	NA	NA
cg16655338	0.0937966	0.120958	10.872	1.51445e-15	2.94546e-13	25.1036	0.0740595	0.167856	0.0937966	6	72892901	R	I	RIMS1	Body	shore	Body-shore	chr6:72892037-72892877	TRUE	NA
cg06947913	-0.382597	0.266233	-10.8719	1.51492e-15	2.94546e-13	25.1033	0.457531	0.0749344	-0.382597	12	50297793	R	I	FAIM2	TSS200	island	TSS200-island	chr12:50297580-50297988	TRUE	TRUE
cg15251319	-0.195686	0.74502	-10.8712	1.51864e-15	2.95098e-13	25.1008	0.842863	0.647178	-0.195686	3	194836302	R	I	C3orf21	Body	opensea	Body-opensea		NA	NA
cg03574723	-0.259406	0.227135	-10.8711	1.51924e-15	2.95098e-13	25.1005	0.356837	0.0974317	-0.259406	10	125425994	R	I	GPR26	1stExon	island	1stExon-island	chr10:125425495-125426642	NA	TRUE
cg07964848	-0.367054	0.381104	-10.8704	1.52317e-15	2.95576e-13	25.0979	0.564631	0.197577	-0.367054	10	28035894	R	II	MKX	TSS1500	shore	TSS1500-shore	chr10:28030182-28035211	NA	NA
cg07545037	-0.217995	0.785947	-10.8696	1.52758e-15	2.96288e-13	25.095	0.894945	0.67695	-0.217995	12	54423920	R	II	HOXC4	5'UTR	shore	5'UTR-shore	chr12:54424610-54425173	NA	NA
cg00348389	-0.20744	0.746774	-10.8679	1.53667e-15	2.97907e-13	25.0891	0.850494	0.643054	-0.20744	16	31235706	R	II	TRIM72	Body	island	Body-island	chr16:31235525-31236104	NA	NA
cg26147279	0.209839	0.646714	10.8658	1.54802e-15	2.99817e-13	25.0818	0.541794	0.751634	0.209839	3	13977886	F	II	TPRXL	TSS1500	shelf	TSS1500-shelf	chr3:13974400-13974867	NA	NA
cg03408904	-0.339683	0.477385	-10.8654	1.55067e-15	3.00186e-13	25.0802	0.647227	0.307543	-0.339683	22	17956462	F	II	CECR2	TSS200	opensea	TSS200-opensea		NA	NA
cg00154357	-0.233111	0.457691	-10.8629	1.56446e-15	3.02563e-13	25.0714	0.574247	0.341136	-0.233111	3	147111280	R	I	ZIC4	Body	island	Body-island	chr3:147108511-147111703	TRUE	NA
cg04059568	-0.380566	0.280418	-10.8629	1.56447e-15	3.02563e-13	25.0714	0.4707	0.0901347	-0.380566	7	157486012	F	II	PTPRN2	Body	island	Body-island	chr7:157476886-157486719	NA	NA		rs2530400
cg03452174	0.155471	0.256709	10.8596	1.58317e-15	3.06033e-13	25.0596	0.178973	0.334445	0.155471	17	27045113	F	I	RAB34	Body	shore	Body-shore	chr17:27046856-27047273	TRUE	NA
cg15854847	-0.306059	0.230241	-10.8585	1.58925e-15	3.0706e-13	25.0558	0.383271	0.0772118	-0.306059	8	23563970	F	I	NKX2-6	TSS200	island	TSS200-island	chr8:23562475-23565175	NA	TRUE
cg01687040	0.29897	0.685088	10.8563	1.6019e-15	3.09057e-13	25.0479	0.535603	0.834573	0.29897	12	55043559	R	II	DCD	TSS1500	opensea	TSS1500-opensea		NA	NA
cg07892597	-0.292351	0.532465	-10.8551	1.60887e-15	3.10252e-13	25.0436	0.678641	0.38629	-0.292351	1	119532093	F	II	TBX15	1stExon	island	1stExon-island	chr1:119531991-119532196	NA	TRUE		rs75552845	rs75870087
cg04692403	-0.297141	0.411724	-10.8523	1.62486e-15	3.12918e-13	25.0338	0.560295	0.263153	-0.297141	6	134210812	F	II	TCF21	1stExon	island	1stExon-island	chr6:134210639-134211218	TRUE	NA
cg20282814	0.330617	0.759815	10.8523	1.62503e-15	3.12918e-13	25.0337	0.594507	0.925124	0.330617	1	43423072	F	II	SLC2A1	Body	shore	Body-shore	chr1:43423467-43424768	NA	NA		rs79316235
cg10636246	0.315184	0.484564	10.8517	1.62858e-15	3.13299e-13	25.0316	0.326972	0.642156	0.315184	1	159046973	F	II	AIM2	TSS1500	opensea	TSS1500-opensea		NA	NA		rs3834102
cg15833353	0.299409	0.522549	10.8476	1.6524e-15	3.17427e-13	25.0171	0.372845	0.672254	0.299409	5	33807278	R	II	ADAMTS12	Body	opensea	Body-opensea		NA	TRUE
cg05246522	0.301638	0.699486	10.8455	1.66483e-15	3.19221e-13	25.0097	0.548667	0.850305	0.301638	17	25798973	R	II	KSR1	TSS200	opensea	TSS200-opensea		NA	NA
cg06299284	-0.339691	0.409682	-10.8455	1.66494e-15	3.19221e-13	25.0097	0.579528	0.239837	-0.339691	11	636659	R	I	DRD4	TSS1500	island	TSS1500-island	chr11:636435-636668	NA	NA
cg21101743	-0.425926	0.320227	-10.8438	1.67489e-15	3.20975e-13	25.0037	0.53319	0.107264	-0.425926	7	39649254	R	II	LOC646999	Body	island	Body-island	chr7:39649253-39649510	TRUE	TRUE
cg00373436	0.28036	0.604938	10.8414	1.68926e-15	3.23575e-13	24.9953	0.464758	0.745118	0.28036	3	111721343	R	II	TAGLN3	Body	opensea	Body-opensea		NA	TRUE
cg15277914	0.185566	0.326689	10.8412	1.69068e-15	3.23693e-13	24.9944	0.233906	0.419472	0.185566	3	154042611	R	I	DHX36	TSS1500	shore	TSS1500-shore	chr3:154042004-154042376	NA	NA
cg10038618	-0.296732	0.475511	-10.8396	1.70024e-15	3.25212e-13	24.9889	0.623877	0.327145	-0.296732	1	3567719	F	II	TP73	TSS1500	island	TSS1500-island	chr1:3566445-3569636	NA	NA
cg19720260	0.253966	0.476871	10.8376	1.71279e-15	3.27456e-13	24.9816	0.349888	0.603854	0.253966	11	114549291	F	II	FAM55B	5'UTR	opensea	5'UTR-opensea		NA	NA
cg05696153	-0.176925	0.774782	-10.8366	1.71895e-15	3.28477e-13	24.978	0.863245	0.68632	-0.176925	16	81732038	R	I	CMIP	Body	opensea	Body-opensea		NA	NA
cg13803688	-0.273029	0.51828	-10.8357	1.72452e-15	3.29016e-13	24.9748	0.654794	0.381765	-0.273029	1	110610452	R	I	ALX3	Body	island	Body-island	chr1:110610265-110613303	NA	NA
cg07303143	0.259818	0.306138	10.8356	1.72526e-15	3.29016e-13	24.9744	0.176229	0.436047	0.259818	3	44803452	R	II	KIAA1143	TSS1500	island	TSS1500-island	chr3:44802852-44803618	NA	NA
cg03287111	-0.362667	0.306054	-10.8355	1.72588e-15	3.29016e-13	24.974	0.487388	0.12472	-0.362667	2	121625634	F	II	GLI2	Body	shore	Body-shore	chr2:121624827-121625209	TRUE	TRUE
cg07109115	-0.260483	0.452144	-10.8327	1.74311e-15	3.32142e-13	24.9642	0.582385	0.321902	-0.260483	10	28030398	R	II	MKX	Body	island	Body-island	chr10:28030182-28035211	NA	NA
cg10023530	-0.315037	0.266067	-10.8314	1.7508e-15	3.33449e-13	24.9598	0.423585	0.108549	-0.315037	18	11148783	F	II	FAM38B	TSS200	island	TSS200-island	chr18:11148307-11149936	NA	NA
cg10236857	0.208888	0.591293	10.8294	1.76374e-15	3.35277e-13	24.9525	0.486849	0.695737	0.208888	17	79825681	R	I	ARHGDIA	3'UTR	shore	3'UTR-shore	chr17:79826700-79827675	NA	NA
cg19867917	-0.300147	0.518621	-10.8289	1.76696e-15	3.35571e-13	24.9507	0.668695	0.368548	-0.300147	2	3642629	R	I	COLEC11	TSS200	island	TSS200-island	chr2:3642547-3642751	TRUE	TRUE
cg02583247	0.234406	0.799584	10.8266	1.78161e-15	3.38193e-13	24.9425	0.682382	0.916787	0.234406	12	4555311	R	II	FGF6	TSS1500	shore	TSS1500-shore	chr12:4554405-4554624	NA	NA
cg10216414	0.21913	0.308883	10.8263	1.78313e-15	3.38321e-13	24.9417	0.199318	0.418448	0.21913	2	101868516	F	II	C2orf29	TSS1500	shore	TSS1500-shore	chr2:101869023-101869876	NA	NA
cg10628699	-0.143796	0.83859	-10.8247	1.79338e-15	3.40104e-13	24.936	0.910488	0.766691	-0.143796	13	103531040	R	II	LOC121952	TSS1500	opensea	TSS1500-opensea		NA	TRUE
cg03028506	-0.243572	0.734482	-10.8241	1.79721e-15	3.4067e-13	24.9339	0.856268	0.612696	-0.243572	15	38577420	F	II	SPRED1	Body	opensea	Body-opensea		NA	TRUE
cg03312427	0.2243	0.554411	10.8239	1.7989e-15	3.4083e-13	24.9329	0.442261	0.666561	0.2243	1	226778381	R	II	C1orf95	Body	opensea	Body-opensea		NA	TRUE
cg16565154	0.379718	0.529814	10.8232	1.80336e-15	3.41513e-13	24.9305	0.339955	0.719673	0.379718	1	151129062	R	II	TNFAIP8L2	TSS200	opensea	TSS200-opensea		NA	NA
cg11705975	-0.195724	0.551766	-10.823	1.80491e-15	3.41644e-13	24.9296	0.649628	0.453904	-0.195724	10	120354248	R	I	PRLHR	Body	island	Body-island	chr10:120353692-120355821	TRUE	NA
cg19742736	-0.0985828	0.884779	-10.8226	1.80718e-15	3.41912e-13	24.9284	0.934071	0.835488	-0.0985828	20	439960	F	II	TBC1D20	Body	shelf	Body-shelf	chr20:442530-443365	NA	NA
cg23221540	-0.098686	0.896491	-10.8219	1.81187e-15	3.42638e-13	24.9258	0.945834	0.847149	-0.098686	5	1092417	R	II	SLC12A7	Body	shore	Body-shore	chr5:1093579-1093837	NA	NA
cg05938001	-0.320945	0.432705	-10.8182	1.83601e-15	3.47039e-13	24.9127	0.593177	0.272232	-0.320945	2	172952948	F	II	DLX1	Body	island	Body-island	chr2:172952809-172953160	NA	NA
cg18194945	-0.310385	0.469796	-10.8166	1.84642e-15	3.48843e-13	24.9071	0.624989	0.314604	-0.310385	3	157820591	R	II	SHOX2	Body	shore	Body-shore	chr3:157821232-157821604	NA	NA
cg25172185	0.298108	0.663567	10.8136	1.86636e-15	3.52279e-13	24.8964	0.514513	0.812621	0.298108	17	31689788	R	II	ACCN1	Body	opensea	Body-opensea		NA	TRUE
cg08125821	-0.333282	0.244637	-10.813	1.87068e-15	3.52926e-13	24.8941	0.411278	0.077996	-0.333282	8	114445779	R	II	CSMD3	Body	shore	Body-shore	chr8:114444826-114445085	NA	TRUE
cg13654884	-0.129863	0.859077	-10.8121	1.87639e-15	3.53838e-13	24.8911	0.924008	0.794146	-0.129863	10	94594240	F	II	EXOC6	TSS1500	opensea	TSS1500-opensea		NA	TRUE
cg21000072	-0.218388	0.234518	-10.8108	1.8853e-15	3.5535e-13	24.8864	0.343712	0.125324	-0.218388	1	3567408	R	I	WDR8	TSS1500	island	TSS1500-island	chr1:3566445-3569636	NA	NA
cg22779330	0.276379	0.765679	10.8095	1.8939e-15	3.56804e-13	24.8819	0.627489	0.903868	0.276379	11	69061911	F	II	MYEOV	5'UTR	opensea	5'UTR-opensea		NA	TRUE		rs11228608
cg08607625	-0.168642	0.67658	-10.809	1.89737e-15	3.57289e-13	24.8801	0.760901	0.592259	-0.168642	7	150690699	F	I	NOS3	5'UTR	opensea	5'UTR-opensea		NA	NA
cg21560697	0.34739	0.747286	10.8086	1.90018e-15	3.57635e-13	24.8786	0.57359	0.920981	0.34739	2	10054883	R	II	TAF1B	Body	opensea	Body-opensea		TRUE	TRUE
cg16804284	-0.346348	0.342432	-10.8073	1.9092e-15	3.58842e-13	24.8739	0.515606	0.169258	-0.346348	14	29237480	F	II	FOXG1	1stExon	island	1stExon-island	chr14:29236835-29237832	NA	NA
cg05754905	0.351442	0.769969	10.8058	1.91911e-15	3.60535e-13	24.8688	0.594248	0.94569	0.351442	1	160992352	R	II	F11R	TSS1500	shore	TSS1500-shore	chr1:160990718-160991225	NA	NA
cg20534702	0.336082	0.695305	10.8049	1.92517e-15	3.61505e-13	24.8657	0.527264	0.863346	0.336082	7	4752170	R	II	FOXK1	Body	opensea	Body-opensea		TRUE	NA
cg15995592	-0.30731	0.638308	-10.8033	1.93651e-15	3.63464e-13	24.8598	0.791963	0.484653	-0.30731	2	160614976	R	II	2019-03-07	Body	opensea	Body-opensea		NA	TRUE
cg07352544	-0.226805	0.52157	-10.8	1.9597e-15	3.67645e-13	24.848	0.634973	0.408168	-0.226805	1	26126233	F	II	SEPN1	TSS1500	opensea	TSS1500-opensea		NA	NA		rs10719116
cg26847503	0.230953	0.581849	10.7997	1.96169e-15	3.67846e-13	24.847	0.466372	0.697325	0.230953	7	143056341	F	II	FAM131B	Body	shelf	Body-shelf	chr7:143058917-143060156	NA	NA
cg23360388	-0.0854692	0.874599	-10.7971	1.98003e-15	3.70938e-13	24.8378	0.917333	0.831864	-0.0854692	5	94726774	R	II	FAM81B	TSS1500	opensea	TSS1500-opensea		NA	NA
cg05845376	-0.25764	0.756303	-10.7959	1.98841e-15	3.7216e-13	24.8336	0.885123	0.627483	-0.25764	5	140683632	F	I	SLC25A2	TSS200	island	TSS200-island	chr5:140683195-140683773	NA	NA		rs7724001
cg15416877	-0.297927	0.463501	-10.7957	1.9899e-15	3.72264e-13	24.8329	0.612465	0.314538	-0.297927	6	108492769	F	II	NR2E1	Body	shore	Body-shore	chr6:108491033-108491410	NA	NA		rs34821262
cg03655683	-0.395118	0.341183	-10.7953	1.99307e-15	3.72509e-13	24.8313	0.538742	0.143624	-0.395118	2	63281383	F	II	OTX1	Body	shore	Body-shore	chr2:63282514-63283122	NA	NA
cg23019935	-0.341544	0.242496	-10.7937	2.00474e-15	3.74341e-13	24.8255	0.413267	0.0717237	-0.341544	1	22416488	R	II	CDC42	Body	opensea	Body-opensea		NA	TRUE
cg15607672	-0.342707	0.473541	-10.7932	2.00786e-15	3.74751e-13	24.824	0.644895	0.302187	-0.342707	14	57277227	R	II	OTX2	TSS200	shore	TSS200-shore	chr14:57278068-57278287	NA	NA
cg17031967	-0.183361	0.764666	-10.7923	2.01439e-15	3.75619e-13	24.8207	0.856347	0.672986	-0.183361	6	25297487	R	II	LRRC16A	Body	opensea	Body-opensea		NA	TRUE
cg11938455	-0.406131	0.323965	-10.7919	2.01758e-15	3.76039e-13	24.8192	0.52703	0.1209	-0.406131	6	15622032	R	II	DTNBP1	Body	opensea	Body-opensea		NA	TRUE
cg12858577	-0.254415	0.527144	-10.7892	2.0367e-15	3.7925e-13	24.8098	0.654352	0.399937	-0.254415	17	75385278	R	I	2019-09-09	5'UTR	opensea	5'UTR-opensea		TRUE	TRUE			rs94598
cg20892260	-0.313132	0.271743	-10.7868	2.0547e-15	3.82424e-13	24.8011	0.428309	0.115177	-0.313132	8	23564025	R	I	NKX2-6	TSS200	island	TSS200-island	chr8:23562475-23565175	NA	TRUE
cg27313012	-0.158247	0.736979	-10.7855	2.06385e-15	3.8377e-13	24.7967	0.816103	0.657856	-0.158247	1	233497542	F	II	KIAA1804	Body	shore	Body-shore	chr1:233497707-233497917	NA	NA		rs34523717
cg20841748	-0.210649	0.707967	-10.7849	2.06881e-15	3.84335e-13	24.7943	0.813292	0.602643	-0.210649	17	40838078	F	II	CNTNAP1	Body	shore	Body-shore	chr17:40838849-40839062	NA	NA
cg27038198	-0.17271	0.814312	-10.7786	2.11582e-15	3.92159e-13	24.772	0.900667	0.727957	-0.17271	7	86686461	F	II	KIAA1324L	Body	shelf	Body-shelf	chr7:86688832-86689238	NA	NA			rs55723217
cg16145324	-0.190631	0.763604	-10.7781	2.11959e-15	3.92495e-13	24.7703	0.858919	0.668289	-0.190631	6	36020012	F	II	MAPK14	Body	opensea	Body-opensea		NA	TRUE
cg02377544	-0.158892	0.66019	-10.7751	2.143e-15	3.96646e-13	24.7594	0.739636	0.580745	-0.158892	15	37388359	F	I	MEIS2	Body	shore	Body-shore	chr15:37390175-37390380	NA	NA
cg22274117	0.427092	0.408144	10.7734	2.15576e-15	3.98825e-13	24.7535	0.194598	0.62169	0.427092	6	16713613	F	II	ATXN1	5'UTR	opensea	5'UTR-opensea		NA	TRUE		rs75654158
cg22989843	-0.358404	0.33145	-10.7715	2.17047e-15	4.00753e-13	24.7467	0.510652	0.152249	-0.358404	2	223154201	F	II	PAX3	Body	shore	Body-shore	chr2:223155726-223156154	NA	NA
cg10853949	0.250306	0.635076	10.7715	2.17072e-15	4.00753e-13	24.7466	0.509923	0.760229	0.250306	17	80290217	R	I	SECTM1	5'UTR	shore	5'UTR-shore	chr17:80291020-80292394	NA	NA
cg02696327	-0.350524	0.433157	-10.7714	2.17164e-15	4.00753e-13	24.7462	0.608419	0.257895	-0.350524	16	49312543	F	II	CBLN1	3'UTR	shore	3'UTR-shore	chr16:49314037-49316543	NA	NA		rs74641028
cg23676151	-0.34732	0.413887	-10.7713	2.17219e-15	4.00753e-13	24.746	0.587547	0.240227	-0.34732	6	108491372	F	II	NR2E1	Body	island	Body-island	chr6:108491033-108491410	NA	TRUE
cg09619146	-0.281333	0.525167	-10.7707	2.17664e-15	4.01391e-13	24.7439	0.665834	0.384501	-0.281333	10	125651034	F	II	CPXM2	1stExon	island	1stExon-island	chr10:125650820-125651373	NA	NA
cg00939495	-0.3305	0.28274	-10.7697	2.18478e-15	4.02707e-13	24.7402	0.44799	0.11749	-0.3305	4	9783398	F	I	DRD5	1stExon	island	1stExon-island	chr4:9783035-9784960	TRUE	NA		rs2076907
cg01644731	-0.205528	0.697043	-10.7694	2.18724e-15	4.02973e-13	24.7391	0.799807	0.594279	-0.205528	12	58236712	F	II	CTDSP2	Body	shelf	Body-shelf	chr12:58238840-58241046	NA	NA
cg00870166	0.160265	0.173164	10.7678	2.1997e-15	4.04897e-13	24.7335	0.0930318	0.253297	0.160265	8	74660057	R	II	STAU2	TSS1500	shore	TSS1500-shore	chr8:74658490-74659828	NA	NA
cg06151145	-0.161681	0.703578	-10.7653	2.21964e-15	4.0838e-13	24.7245	0.784418	0.622737	-0.161681	4	48346434	F	II	SLAIN2	Body	shelf	Body-shelf	chr4:48343089-48344329	NA	NA
cg07429284	-0.192848	0.517536	-10.7628	2.23955e-15	4.11855e-13	24.7157	0.61396	0.421112	-0.192848	5	132107420	R	II	2019-09-08	Body	opensea	Body-opensea		TRUE	TRUE
cg17045635	-0.1829	0.789865	-10.7586	2.27304e-15	4.1763e-13	24.701	0.881315	0.698415	-0.1829	10	80998130	R	II	ZMIZ1	Body	shelf	Body-shelf	chr10:81002109-81003687	NA	TRUE
cg10216717	0.323073	0.693273	10.7562	2.29322e-15	4.20613e-13	24.6922	0.531736	0.854809	0.323073	12	128899290	R	II	TMEM132C	Body	shore	Body-shore	chr12:128899813-128900065	NA	NA
cg03078400	0.0874758	0.102396	10.7559	2.29523e-15	4.20613e-13	24.6913	0.0586582	0.146134	0.0874758	6	31762644	F	I	VARS	Body	shore	Body-shore	chr6:31763240-31763905	NA	NA
cg25033990	-0.302991	0.265874	-10.7559	2.29558e-15	4.20613e-13	24.6912	0.417369	0.114379	-0.302991	17	32484014	R	II	ACCN1	TSS200	island	TSS200-island	chr17:32484007-32484280	NA	TRUE
cg26799474	0.374657	0.665692	10.7551	2.30217e-15	4.21629e-13	24.6883	0.478363	0.85302	0.374657	2	202098951	R	II	CASP8	5'UTR	opensea	5'UTR-opensea		NA	NA
cg08282819	0.257505	0.241371	10.7535	2.3152e-15	4.23627e-13	24.6827	0.112618	0.370123	0.257505	16	27437900	F	II	IL21R	TSS1500	opensea	TSS1500-opensea		TRUE	TRUE
cg09550083	-0.323707	0.567373	-10.7514	2.333e-15	4.26539e-13	24.6751	0.729227	0.40552	-0.323707	2	66672337	R	II	MEIS1	Body	shore	Body-shore	chr2:66672431-66673636	NA	NA
cg06106653	0.365571	0.610852	10.7514	2.33324e-15	4.26539e-13	24.675	0.428066	0.793637	0.365571	10	84719878	R	II	NRG3	Body	opensea	Body-opensea		NA	TRUE
cg09108394	0.320355	0.617511	10.7509	2.33726e-15	4.2708e-13	24.6733	0.457334	0.777689	0.320355	16	23850106	R	II	PRKCB	Body	shelf	Body-shelf	chr16:23846941-23848102	NA	NA
cg01499197	-0.3619	0.374108	-10.7502	2.34265e-15	4.2787e-13	24.6711	0.555058	0.193158	-0.3619	13	28544814	F	II	CDX2	TSS1500	island	TSS1500-island	chr13:28544524-28544890	NA	TRUE
cg10565216	-0.145843	0.836505	-10.7497	2.34689e-15	4.28448e-13	24.6693	0.909427	0.763583	-0.145843	8	22785257	F	II	PEBP4	5'UTR	opensea	5'UTR-opensea		NA	NA
cg02332525	-0.267799	0.325842	-10.7476	2.365e-15	4.31557e-13	24.6616	0.459742	0.191943	-0.267799	3	6903153	R	II	GRM7	1stExon	island	1stExon-island	chr3:6902823-6903516	NA	NA
cg11429969	-0.160595	0.340017	-10.7467	2.37244e-15	4.32719e-13	24.6585	0.420314	0.259719	-0.160595	5	140180921	R	I	PCDHA2	Body	island	Body-island	chr5:140180844-140181082	NA	NA
cg27259271	-0.340085	0.427849	-10.7465	2.37429e-15	4.32858e-13	24.6578	0.597892	0.257807	-0.340085	1	243646395	R	II	SDCCAG8	Body	island	Body-island	chr1:243646394-243646888	NA	TRUE
cg21195256	-0.364839	0.342862	-10.7457	2.38076e-15	4.33643e-13	24.6551	0.525281	0.160442	-0.364839	14	29244278	R	I	C14orf23	Body	shore	Body-shore	chr14:29243403-29243763	NA	TRUE
cg18694169	-0.254018	0.307457	-10.7455	2.38299e-15	4.33852e-13	24.6541	0.434466	0.180447	-0.254018	6	28227079	R	I	NKAPL	TSS200	island	TSS200-island	chr6:28226979-28227483	NA	NA	high-CpG:28335047-28335084
cg05184519	0.280114	0.596386	10.7433	2.40206e-15	4.37126e-13	24.6462	0.456329	0.736443	0.280114	11	132080258	F	II	NTM	Body	opensea	Body-opensea		NA	NA		rs34865876
cg16565394	-0.320919	0.414317	-10.7415	2.41778e-15	4.39587e-13	24.6398	0.574776	0.253858	-0.320919	6	100896674	R	II	SIM1	Body	shore	Body-shore	chr6:100897080-100897621	NA	NA
cg12806121	-0.187694	0.747853	-10.7381	2.44699e-15	4.44292e-13	24.6278	0.8417	0.654006	-0.187694	1	10601389	F	II	PEX14	Body	opensea	Body-opensea		NA	TRUE
cg02317955	0.291155	0.789348	10.7365	2.46159e-15	4.46743e-13	24.6219	0.64377	0.934925	0.291155	17	79099481	F	II	MIR657	TSS1500	shelf	TSS1500-shelf	chr17:79102748-79102970	NA	NA
cg27296341	-0.343963	0.571036	-10.7346	2.47828e-15	4.49568e-13	24.6152	0.743018	0.399055	-0.343963	6	154485839	F	II	IPCEF1	Body	opensea	Body-opensea		NA	TRUE
cg06884882	0.17583	0.339505	10.7316	2.50461e-15	4.54138e-13	24.6048	0.25159	0.42742	0.17583	1	45187946	R	II	C1orf228	Body	shore	Body-shore	chr1:45189705-45190558	TRUE	NA
cg00359285	-0.153365	0.837895	-10.7314	2.50655e-15	4.54285e-13	24.604	0.914577	0.761212	-0.153365	3	195599248	R	II	TNK2	Body	island	Body-island	chr3:195599024-195599392	NA	NA
cg07857469	-0.271062	0.518903	-10.7298	2.52155e-15	4.56468e-13	24.5981	0.654434	0.383372	-0.271062	4	81107185	F	II	PRDM8	5'UTR	shore	5'UTR-shore	chr4:81104761-81105527	NA	NA
cg06117072	-0.343332	0.419085	-10.7297	2.52202e-15	4.56468e-13	24.5979	0.590751	0.247419	-0.343332	6	50791385	R	II	TFAP2B	Body	island	Body-island	chr6:50791110-50791573	NA	NA
cg05855917	-0.410615	0.288874	-10.7295	2.52345e-15	4.56521e-13	24.5973	0.494181	0.0835663	-0.410615	3	147113700	R	II	ZIC4	Body	island	Body-island	chr3:147113608-147114479	NA	TRUE
cg00696930	0.24084	0.459234	10.7281	2.53683e-15	4.58734e-13	24.5921	0.338814	0.579654	0.24084	1	183164412	F	II	LAMC2	Body	opensea	Body-opensea		NA	TRUE			rs78859052
cg20996682	-0.300946	0.295308	-10.7279	2.53886e-15	4.58839e-13	24.5913	0.445781	0.144835	-0.300946	7	79084048	F	II	MAGI2	TSS1500	shore	TSS1500-shore	chr7:79082174-79082427	NA	NA
cg19459207	0.285081	0.545607	10.7278	2.5397e-15	4.58839e-13	24.591	0.403066	0.688148	0.285081	5	49737773	F	II	EMB	TSS1500	shore	TSS1500-shore	chr5:49736607-49737300	NA	NA
cg08393937	0.321775	0.634128	10.7269	2.54778e-15	4.60091e-13	24.5878	0.47324	0.795015	0.321775	5	78277492	R	II	ARSB	Body	shelf	Body-shelf	chr5:78280317-78281300	NA	NA
cg23878241	0.175064	0.25125	10.7264	2.5523e-15	4.60701e-13	24.5861	0.163718	0.338782	0.175064	12	111019734	R	I	PPTC7	Body	shore	Body-shore	chr12:111020507-111021192	NA	NA
cg10798682	-0.13177	0.810027	-10.7261	2.5551e-15	4.60998e-13	24.585	0.875912	0.744141	-0.13177	3	125820372	F	II	SLC41A3	5'UTR	opensea	5'UTR-opensea		NA	TRUE
cg24634333	-0.30193	0.531233	-10.7253	2.56216e-15	4.62065e-13	24.5822	0.682199	0.380268	-0.30193	6	111887834	R	II	TRAF3IP2	Body	opensea	Body-opensea		NA	NA
cg13316854	-0.251507	0.316235	-10.7251	2.56446e-15	4.6227e-13	24.5814	0.441988	0.190481	-0.251507	2	177027856	F	I	HOXD3	TSS1500	island	TSS1500-island	chr2:177027617-177028014	NA	NA
cg26263675	-0.307318	0.346579	-10.7225	2.58801e-15	4.66096e-13	24.5723	0.500238	0.19292	-0.307318	17	72743191	R	II	RAB37	3'UTR	shore	3'UTR-shore	chr17:72744428-72745952	NA	NA
cg11618529	-0.285818	0.348413	-10.72	2.61139e-15	4.69674e-13	24.5634	0.491322	0.205504	-0.285818	19	58952108	R	II	ZNF132	TSS1500	island	TSS1500-island	chr19:58951214-58952250	TRUE	NA
cg04528771	0.194746	0.305489	10.7195	2.6163e-15	4.70347e-13	24.5615	0.208116	0.402862	0.194746	17	27893087	R	II	ABHD15	Body	island	Body-island	chr17:27893086-27896078	NA	NA
cg19473529	-0.358251	0.325406	-10.7167	2.64274e-15	4.74035e-13	24.5515	0.504532	0.146281	-0.358251	20	48726783	F	II	UBE2V1	Body	shelf	Body-shelf	chr20:48729268-48729798	NA	NA
cg07533239	0.249008	0.356924	10.7149	2.66022e-15	4.76744e-13	24.545	0.23242	0.481428	0.249008	12	6422131	R	II	PLEKHG6	1stExon	shelf	1stExon-shelf	chr12:6419603-6420024	TRUE	TRUE
cg17934775	0.222617	0.343424	10.7088	2.71916e-15	4.86653e-13	24.5233	0.232115	0.454733	0.222617	15	93450129	R	II	CHD2	Body	shelf	Body-shelf	chr15:93447556-93447823	NA	TRUE
cg21200539	-0.313499	0.22018	-10.7081	2.72601e-15	4.87663e-13	24.5208	0.376929	0.0634307	-0.313499	4	147562073	R	II	POU4F2	3'UTR	shore	3'UTR-shore	chr4:147559205-147561901	NA	TRUE
cg14405528	-0.204459	0.797441	-10.707	2.73681e-15	4.89376e-13	24.5169	0.899671	0.695211	-0.204459	22	47372700	F	I	TBC1D22A	Body	shelf	Body-shelf	chr22:47370112-47370343	NA	NA		rs743606
cg22186315	-0.113105	0.87034	-10.7057	2.74942e-15	4.91193e-13	24.5123	0.926892	0.813787	-0.113105	17	79259963	F	II	SLC38A10	Body	shore	Body-shore	chr17:79259282-79259537	TRUE	TRUE		rs77152511
cg03431727	0.250224	0.717604	10.7054	2.75236e-15	4.91498e-13	24.5112	0.592492	0.842716	0.250224	2	217234404	F	II	2019-03-04	Body	shore	Body-shore	chr2:217236025-217237129	NA	TRUE
cg18497508	-0.357241	0.389035	-10.7037	2.7688e-15	4.93995e-13	24.5053	0.567656	0.210414	-0.357241	6	41528345	F	II	FOXP4	5'UTR	island	5'UTR-island	chr6:41528266-41528900	TRUE	TRUE
cg01511557	-0.243281	0.592252	-10.7036	2.77022e-15	4.94027e-13	24.5048	0.713892	0.470611	-0.243281	1	50514319	F	II	ELAVL4	Body	island	Body-island	chr1:50513644-50514320	NA	TRUE
cg17104824	-0.325	0.552711	-10.7026	2.77976e-15	4.95508e-13	24.5014	0.715211	0.390211	-0.325	2	177014959	R	II	HOXD4	TSS1500	island	TSS1500-island	chr2:177014948-177015214	NA	NA
cg17191462	-0.391369	0.270826	-10.701	2.79577e-15	4.9814e-13	24.4957	0.466511	0.0751414	-0.391369	6	50690975	R	II	TFAP2D	Body	shore	Body-shore	chr6:50692149-50692375	NA	TRUE
cg01149264	0.253479	0.754908	10.7004	2.80192e-15	4.98793e-13	24.4935	0.628168	0.881648	0.253479	16	644081	F	I	RAB40C	Body	shelf	Body-shelf	chr16:638545-640705	NA	NA
cg21207665	-0.381711	0.325086	-10.6979	2.82714e-15	5.03059e-13	24.4847	0.515942	0.134231	-0.381711	14	37129342	F	II	PAX9	5'UTR	shore	5'UTR-shore	chr14:37131181-37132785	NA	NA		rs76370425
cg04597433	-0.335269	0.285118	-10.6977	2.82995e-15	5.03335e-13	24.4837	0.452752	0.117483	-0.335269	4	9783206	R	I	DRD5	TSS200	island	TSS200-island	chr4:9783035-9784960	NA	NA
cg07854547	-0.294621	0.355123	-10.6961	2.84602e-15	5.05745e-13	24.4781	0.502434	0.207813	-0.294621	8	50823173	R	II	SNTG1	TSS1500	shore	TSS1500-shore	chr8:50822270-50822860	NA	TRUE
cg26492368	-0.311649	0.394007	-10.694	2.86722e-15	5.08836e-13	24.4707	0.549831	0.238182	-0.311649	10	22634733	R	I	SPAG6	Body	island	Body-island	chr10:22634000-22634862	NA	NA
cg10549973	0.198204	0.239277	10.6923	2.8855e-15	5.11625e-13	24.4644	0.140175	0.33838	0.198204	14	58863097	R	II	TOMM20L	Body	island	Body-island	chr14:58862541-58863209	NA	TRUE
cg21684012	-0.300105	0.251676	-10.6916	2.89227e-15	5.12426e-13	24.4621	0.401728	0.101623	-0.300105	6	100912906	F	I	SIM1	TSS1500	island	TSS1500-island	chr6:100912071-100913337	TRUE	NA		rs3756916
cg00974095	0.269052	0.677048	10.6916	2.89257e-15	5.12426e-13	24.462	0.542522	0.811574	0.269052	1	40154614	F	II	HPCAL4	5'UTR	shelf	5'UTR-shelf	chr1:40156930-40158514	NA	NA		rs41536844
cg12447832	0.213312	0.481622	10.6908	2.90034e-15	5.13575e-13	24.4593	0.374966	0.588278	0.213312	2	3383257	R	II	TTC15	TSS200	shore	TSS200-shore	chr2:3383350-3383976	NA	NA
cg01697487	0.237058	0.391559	10.6889	2.92066e-15	5.16945e-13	24.4524	0.27303	0.510088	0.237058	17	48588559	R	II	MYCBPAP	Body	shelf	Body-shelf	chr17:48585385-48586167	NA	NA
cg19926250	0.252496	0.740145	10.6887	2.92303e-15	5.17136e-13	24.4516	0.613897	0.866393	0.252496	3	151034474	F	II	GPR87	5'UTR	opensea	5'UTR-opensea		NA	NA
cg12052661	-0.259452	0.511251	-10.6882	2.92751e-15	5.17393e-13	24.4501	0.640977	0.381525	-0.259452	9	140772545	F	II	CACNA1B	1stExon	island	1stExon-island	chr9:140771300-140773513	NA	NA
cg19404444	-0.389942	0.350852	-10.6867	2.9434e-15	5.19364e-13	24.4447	0.545823	0.155881	-0.389942	1	2164602	R	II	SKI	Body	shelf	Body-shelf	chr1:2158212-2161173	NA	TRUE
cg20996561	-0.254227	0.573584	-10.6856	2.95591e-15	5.2124e-13	24.4405	0.700697	0.44647	-0.254227	22	40082316	F	I	CACNA1I	Body	island	Body-island	chr22:40081519-40082390	NA	NA
cg03676298	-0.154223	0.827694	-10.6854	2.95759e-15	5.2124e-13	24.4399	0.904805	0.750582	-0.154223	3	48078103	R	II	MAP4	5'UTR	opensea	5'UTR-opensea		NA	TRUE
cg16313343	0.227034	0.292138	10.6853	2.95843e-15	5.2124e-13	24.4396	0.178621	0.405655	0.227034	14	105768109	F	II	BRF1	TSS1500	shore	TSS1500-shore	chr14:105766558-105767996	NA	NA		rs75383873
cg05907939	-0.154436	0.831334	-10.6852	2.95923e-15	5.2124e-13	24.4394	0.908552	0.754116	-0.154436	8	129055563	R	II	PVT1	Body	opensea	Body-opensea		NA	TRUE
cg02390725	0.263566	0.755226	10.6839	2.97337e-15	5.2327e-13	24.4346	0.623443	0.887009	0.263566	11	2925768	F	II	SLC22A18	Body	shore	Body-shore	chr11:2923301-2923817	NA	TRUE
cg07237653	-0.225111	0.766307	-10.6824	2.98961e-15	5.25435e-13	24.4292	0.878863	0.653752	-0.225111	8	28950303	R	I	KIF13B	Body	opensea	Body-opensea		NA	NA
cg14601053	-0.145834	0.813514	-10.6807	3.00845e-15	5.28283e-13	24.423	0.886432	0.740597	-0.145834	9	130271989	R	II	FAM129B	Body	shore	Body-shore	chr9:130271237-130271447	NA	NA			rs79499334
cg01900413	-0.339603	0.411029	-10.6804	3.0111e-15	5.28518e-13	24.4221	0.580831	0.241228	-0.339603	11	128419356	F	II	ETS1	Body	island	Body-island	chr11:128419198-128419513	NA	TRUE
cg05965387	-0.227626	0.653339	-10.6791	3.02515e-15	5.30677e-13	24.4175	0.767151	0.539526	-0.227626	13	51418053	R	II	DLEU7	TSS200	island	TSS200-island	chr13:51417371-51418149	NA	NA
cg10145246	-0.340033	0.518269	-10.679	3.02605e-15	5.30677e-13	24.4172	0.688286	0.348253	-0.340033	1	119527884	F	II	TBX15	5'UTR	shore	5'UTR-shore	chr1:119529819-119530712	NA	NA
cg24333189	0.250478	0.399397	10.6772	3.04668e-15	5.33827e-13	24.4105	0.274158	0.524636	0.250478	3	169483132	F	II	TERC	TSS1500	shore	TSS1500-shore	chr3:169482338-169483052	NA	NA
cg19870512	-0.362528	0.287808	-10.6764	3.0554e-15	5.3512e-13	24.4077	0.469072	0.106545	-0.362528	12	4919081	R	I	KCNA6	5'UTR	island	5'UTR-island	chr12:4918273-4919657	NA	NA
cg22596016	-0.267838	0.595325	-10.6721	3.10204e-15	5.43052e-13	24.3926	0.729244	0.461406	-0.267838	17	61711557	R	II	MAP3K3	Body	opensea	Body-opensea		NA	TRUE
cg15959252	-0.266947	0.50929	-10.6712	3.11254e-15	5.44414e-13	24.3893	0.642763	0.375817	-0.266947	12	48578724	R	I	C12orf68	3'UTR	shore	3'UTR-shore	chr12:48577361-48578574	NA	NA
cg03053826	0.221293	0.21506	10.6699	3.12776e-15	5.46472e-13	24.3844	0.104413	0.325706	0.221293	15	96868935	F	II	NR2F2	TSS1500	shelf	TSS1500-shelf	chr15:96864881-96866787	NA	TRUE
cg12756396	-0.261634	0.25958	-10.6686	3.14185e-15	5.48584e-13	24.38	0.390397	0.128763	-0.261634	1	50886969	R	I	DMRTA2	Body	island	Body-island	chr1:50884228-50891471	NA	NA
cg02739870	0.303711	0.569802	10.6682	3.14634e-15	5.49129e-13	24.3786	0.417947	0.721658	0.303711	5	1113320	F	II	SLC12A7	TSS1500	shore	TSS1500-shore	chr5:1111396-1112388	NA	NA		rs73731172
cg05066503	-0.0975883	0.894973	-10.668	3.14873e-15	5.49306e-13	24.3778	0.943767	0.846179	-0.0975883	6	169978311	R	II	WDR27	Body	shore	Body-shore	chr6:169977218-169977894	NA	NA
cg12947833	-0.23756	0.371196	-10.6673	3.15696e-15	5.50502e-13	24.3752	0.489976	0.252416	-0.23756	11	111783499	F	I	HSPB2	5'UTR	opensea	5'UTR-opensea		NA	TRUE
cg06659338	-0.201724	0.703061	-10.6668	3.16262e-15	5.5125e-13	24.3735	0.803923	0.602199	-0.201724	1	54562040	F	II	C1orf83	Body	opensea	Body-opensea		NA	NA
cg20335735	0.232268	0.702553	10.6643	3.1908e-15	5.55746e-13	24.3647	0.586419	0.818687	0.232268	6	150068006	R	II	NUP43	TSS1500	shore	TSS1500-shore	chr6:150067323-150067766	NA	NA
cg21876145	-0.0922962	0.897631	-10.6643	3.19119e-15	5.55746e-13	24.3645	0.943779	0.851483	-0.0922962	2	20243393	R	II	LAPTM4A	Body	opensea	Body-opensea		NA	TRUE
cg01503516	0.199532	0.659091	10.6596	3.24586e-15	5.64776e-13	24.3477	0.559325	0.758857	0.199532	15	85202406	R	II	NMB	TSS1500	shore	TSS1500-shore	chr15:85201196-85201684	NA	NA
cg18098867	-0.119663	0.854614	-10.6594	3.24754e-15	5.64819e-13	24.3472	0.914446	0.794782	-0.119663	7	47373830	F	II	TNS3	Body	opensea	Body-opensea		NA	TRUE
cg11439695	0.226695	0.463602	10.6562	3.28563e-15	5.70704e-13	24.3356	0.350255	0.57695	0.226695	12	2561024	R	II	CACNA1C	Body	opensea	Body-opensea		NA	TRUE
cg21368161	0.166789	0.263363	10.6542	3.30964e-15	5.74377e-13	24.3284	0.179968	0.346758	0.166789	7	1596136	R	I	TMEM184A	TSS200	opensea	TSS200-opensea		NA	NA
cg03217729	-0.313568	0.387954	-10.6537	3.31485e-15	5.75033e-13	24.3268	0.544738	0.23117	-0.313568	16	11222890	R	II	CLEC16A	Body	opensea	Body-opensea		NA	TRUE
cg25321114	-0.140114	0.843707	-10.6518	3.3378e-15	5.78512e-13	24.32	0.913764	0.77365	-0.140114	11	67926276	F	II	SUV420H1	Body	opensea	Body-opensea		NA	NA
cg10557552	-0.214302	0.723698	-10.6517	3.33954e-15	5.78564e-13	24.3195	0.830849	0.616547	-0.214302	14	102681613	F	II	WDR20	Body	shore	Body-shore	chr14:102680287-102680519	TRUE	TRUE
cg01435678	0.240408	0.487486	10.6512	3.34462e-15	5.78943e-13	24.318	0.367282	0.60769	0.240408	1	154377379	F	II	IL6R	TSS1500	shore	TSS1500-shore	chr1:154377670-154378445	NA	NA
cg19716018	0.228136	0.474299	10.6503	3.35636e-15	5.80724e-13	24.3145	0.360232	0.588367	0.228136	19	1438056	R	II	RPS15	TSS1500	shore	TSS1500-shore	chr19:1438287-1438869	NA	NA
cg18582260	0.238969	0.350203	10.648	3.38413e-15	5.85192e-13	24.3063	0.230719	0.469688	0.238969	13	25085301	R	I	PARP4	5'UTR	shore	5'UTR-shore	chr13:25086522-25087067	NA	NA
cg03614193	-0.276171	0.392819	-10.6479	3.3851e-15	5.85192e-13	24.306	0.530904	0.254734	-0.276171	18	55021542	F	I	ST8SIA3	Body	island	Body-island	chr18:55019707-55021605	TRUE	NA		rs3745059
cg14764357	-0.216518	0.720567	-10.647	3.39599e-15	5.86821e-13	24.3029	0.828826	0.612308	-0.216518	7	1093718	F	I	C7orf50	Body	shelf	Body-shelf	chr7:1097405-1097953	NA	TRUE
cg14488715	-0.137428	0.880742	-10.6467	3.39989e-15	5.87241e-13	24.3017	0.949456	0.812028	-0.137428	9	139407288	F	II	NOTCH1	Body	shore	Body-shore	chr9:139408945-139409245	NA	NA
cg25127692	0.292656	0.759491	10.6452	3.41884e-15	5.90006e-13	24.2962	0.613162	0.905819	0.292656	3	185406536	R	II	IGF2BP2	Body	opensea	Body-opensea		TRUE	TRUE
cg24771804	-0.287741	0.203207	-10.6445	3.42681e-15	5.91127e-13	24.2939	0.347078	0.0593365	-0.287741	18	55107755	F	II	ONECUT2	Body	island	Body-island	chr18:55103154-55108853	NA	TRUE
cg17376299	0.288832	0.746394	10.644	3.43305e-15	5.91948e-13	24.2921	0.601978	0.89081	0.288832	17	74931583	F	II	MGAT5B	Body	shelf	Body-shelf	chr17:74928710-74928922	NA	NA		rs1562087
cg07267550	-0.215954	0.744585	-10.6437	3.43618e-15	5.92234e-13	24.2912	0.852563	0.636608	-0.215954	17	74536269	F	I	PRCD	1stExon	shore	1stExon-shore	chr17:74533281-74534566	NA	NA
cg25901381	-0.353079	0.268135	-10.6428	3.44801e-15	5.94017e-13	24.2878	0.444674	0.0915957	-0.353079	7	27225485	R	II	HOXA11AS	Body	island	Body-island	chr7:27225050-27225629	NA	NA
cg01452847	-0.373634	0.310993	-10.6427	3.44964e-15	5.94042e-13	24.2873	0.49781	0.124176	-0.373634	17	46711341	F	I	MIR196A1	TSS1500	island	TSS1500-island	chr17:46710812-46711419	NA	NA
cg10787911	-0.195822	0.737669	-10.642	3.45802e-15	5.9523e-13	24.2849	0.83558	0.639759	-0.195822	8	142368316	R	II	GPR20	5'UTR	shore	5'UTR-shore	chr8:142367050-142367860	NA	NA
cg08842032	0.273346	0.711754	10.6406	3.47535e-15	5.97949e-13	24.28	0.575081	0.848427	0.273346	17	48612147	R	II	EPN3	5'UTR	shore	5'UTR-shore	chr17:48613878-48614466	TRUE	NA
cg16929739	0.359766	0.633763	10.6391	3.49457e-15	6.00746e-13	24.2745	0.45388	0.813645	0.359766	3	11178593	F	II	HRH1	TSS200	opensea	TSS200-opensea		TRUE	TRUE
cg13726218	-0.351565	0.452475	-10.637	3.5207e-15	6.04719e-13	24.2671	0.628258	0.276693	-0.351565	13	72438249	R	II	DACH1	Body	shore	Body-shore	chr13:72439362-72440059	NA	NA
cg07865607	0.1832	0.29816	10.6368	3.52317e-15	6.04884e-13	24.2664	0.20656	0.38976	0.1832	19	3136076	F	I	GNA15	TSS200	opensea	TSS200-opensea		NA	NA	low-CpG:3087026-3087083
cg17480554	0.262461	0.774521	10.636	3.53356e-15	6.06409e-13	24.2635	0.643291	0.905752	0.262461	5	52334107	R	II	ITGA2	Body	opensea	Body-opensea		NA	TRUE
cg19111287	-0.312902	0.680793	-10.6316	3.5899e-15	6.14498e-13	24.2478	0.837244	0.524341	-0.312902	4	3372915	R	II	RGS12	Body	shore	Body-shore	chr4:3374733-3374998	NA	TRUE
cg05132999	0.281389	0.745666	10.6312	3.59448e-15	6.14741e-13	24.2465	0.604971	0.88636	0.281389	1	51796987	F	II	TTC39A	Body	shore	Body-shore	chr1:51796097-51796589	NA	NA
cg21063722	-0.377671	0.317628	-10.6312	3.5948e-15	6.14741e-13	24.2464	0.506464	0.128793	-0.377671	6	100911709	F	I	SIM1	TSS200	shore	TSS200-shore	chr6:100912071-100913337	TRUE	TRUE			rs80193484
cg02970384	-0.293156	0.249155	-10.6311	3.59697e-15	6.14741e-13	24.2458	0.395733	0.102577	-0.293156	1	229567560	F	II	ACTA1	Body	island	Body-island	chr1:229567206-229570684	NA	TRUE
cg09404516	-0.205097	0.612426	-10.6293	3.6194e-15	6.17964e-13	24.2397	0.714974	0.509878	-0.205097	2	54832147	F	II	SPTBN1	Body	opensea	Body-opensea		NA	TRUE
cg11027217	-0.199415	0.753506	-10.6291	3.62278e-15	6.18278e-13	24.2388	0.853214	0.653799	-0.199415	4	113300650	F	I	ALPK1	Body	island	Body-island	chr4:113300552-113300769	NA	TRUE
cg05939560	0.280303	0.40374	10.6283	3.63242e-15	6.19659e-13	24.2361	0.263589	0.543892	0.280303	12	131003775	R	II	RIMBP2	TSS1500	opensea	TSS1500-opensea		NA	NA
cg26924967	0.141367	0.230906	10.6282	3.6345e-15	6.1975e-13	24.2356	0.160222	0.301589	0.141367	19	3136097	R	I	GNA15	TSS200	opensea	TSS200-opensea		NA	NA
cg07561747	-0.230523	0.654038	-10.626	3.66308e-15	6.24358e-13	24.2278	0.7693	0.538777	-0.230523	1	200983313	R	II	KIF21B	Body	opensea	Body-opensea		NA	NA
cg20495738	0.283259	0.5811	10.6256	3.66898e-15	6.25097e-13	24.2262	0.43947	0.72273	0.283259	12	2338399	F	II	CACNA1C	Body	shore	Body-shore	chr12:2339162-2339615	NA	NA
cg03402235	-0.218398	0.690993	-10.6245	3.68333e-15	6.27276e-13	24.2223	0.800192	0.581794	-0.218398	15	42749336	F	II	ZFP106	1stExon	opensea	1stExon-opensea		NA	TRUE
cg13301014	0.143771	0.162104	10.6242	3.687e-15	6.27634e-13	24.2213	0.0902187	0.23399	0.143771	19	38754768	R	II	SPINT2	TSS1500	shore	TSS1500-shore	chr19:38754846-38755699	NA	NA
cg25513635	-0.36814	0.411673	-10.6236	3.69493e-15	6.28607e-13	24.2192	0.595744	0.227603	-0.36814	19	18981378	F	II	GDF1	5'UTR	shore	5'UTR-shore	chr19:18979351-18981200	NA	NA
cg09626867	-0.369521	0.322191	-10.6234	3.69715e-15	6.28607e-13	24.2186	0.506951	0.13743	-0.369521	3	45053351	F	II	EXOSC7	Body	opensea	Body-opensea		TRUE	TRUE
cg27392775	-0.250325	0.764312	-10.6234	3.69742e-15	6.28607e-13	24.2185	0.889474	0.63915	-0.250325	1	202924293	F	II	ADIPOR1	5'UTR	shelf	5'UTR-shelf	chr1:202926879-202927476	NA	NA		rs34807359
cg19712603	-0.331773	0.23	-10.6219	3.71782e-15	6.31807e-13	24.2131	0.395886	0.0641139	-0.331773	13	53422777	F	I	PCDH8	TSS200	island	TSS200-island	chr13:53419897-53422872	TRUE	TRUE	high-CpG:52320770-52320779
cg05423393	-0.41852	0.344901	-10.6205	3.73707e-15	6.34809e-13	24.208	0.554161	0.135642	-0.41852	6	111888567	F	II	TRAF3IP2	Body	opensea	Body-opensea		NA	NA
cg22720790	-0.261484	0.688479	-10.6201	3.74244e-15	6.35328e-13	24.2065	0.819221	0.557737	-0.261484	19	58716032	R	II	ZNF274	Body	island	Body-island	chr19:58715220-58716033	NA	NA
cg11540692	-0.298519	0.409553	-10.6197	3.7478e-15	6.35378e-13	24.2051	0.558813	0.260294	-0.298519	6	100912072	R	II	SIM1	TSS1500	island	TSS1500-island	chr6:100912071-100913337	TRUE	TRUE			rs73494628
cg24818200	-0.275327	0.609149	-10.6196	3.74834e-15	6.35378e-13	24.205	0.746813	0.471486	-0.275327	5	140501365	R	II	PCDHB4	TSS1500	shore	TSS1500-shore	chr5:140502890-140503804	NA	NA
cg06002516	-0.226607	0.697501	-10.6193	3.75209e-15	6.35743e-13	24.204	0.810804	0.584197	-0.226607	12	57666521	R	II	R3HDM2	Body	opensea	Body-opensea		NA	TRUE
cg04539111	-0.220873	0.732768	-10.6159	3.79954e-15	6.42554e-13	24.1915	0.843204	0.622331	-0.220873	16	67997858	R	II	SLC12A4	Body	opensea	Body-opensea		NA	NA
cg03694713	-0.384908	0.285796	-10.6158	3.8003e-15	6.42554e-13	24.1913	0.47825	0.0933418	-0.384908	8	23564156	F	II	NKX2-6	TSS1500	island	TSS1500-island	chr8:23562475-23565175	NA	TRUE
cg11517269	-0.268172	0.605883	-10.6136	3.83019e-15	6.46789e-13	24.1835	0.73997	0.471797	-0.268172	6	28058789	R	II	ZSCAN12L1	TSS200	opensea	TSS200-opensea		NA	NA
cg03632704	-0.359568	0.37859	-10.6129	3.84102e-15	6.48344e-13	24.1807	0.558374	0.198806	-0.359568	5	87973439	R	II	LOC645323	Body	shore	Body-shore	chr5:87973951-87974294	NA	NA
cg19972648	0.347203	0.626	10.6118	3.85522e-15	6.50468e-13	24.1771	0.452399	0.799602	0.347203	10	79110632	R	II	KCNMA1	Body	opensea	Body-opensea		TRUE	TRUE
cg19866866	-0.370475	0.371702	-10.6108	3.86938e-15	6.52308e-13	24.1735	0.55694	0.186465	-0.370475	1	182026044	R	I	ZNF648	Body	island	Body-island	chr1:182025604-182026511	NA	NA
cg12082609	-0.307383	0.533634	-10.6082	3.90579e-15	6.57892e-13	24.1642	0.687325	0.379942	-0.307383	2	66671727	R	II	MEIS1	Body	shore	Body-shore	chr2:66672431-66673636	NA	NA
cg18461347	0.296044	0.607744	10.607	3.92238e-15	6.60131e-13	24.16	0.459722	0.755766	0.296044	7	78947094	R	II	MAGI2	Body	opensea	Body-opensea		TRUE	TRUE
cg11717507	-0.355296	0.275769	-10.6055	3.9447e-15	6.63609e-13	24.1543	0.453417	0.0981203	-0.355296	12	114838825	R	II	TBX5	Body	island	Body-island	chr12:114838312-114838889	NA	NA
cg25215498	-0.191598	0.666758	-10.6045	3.95898e-15	6.65556e-13	24.1508	0.762557	0.570959	-0.191598	3	179560139	R	II	PEX5L	Body	opensea	Body-opensea		NA	TRUE
cg07937271	-0.344627	0.423588	-10.6044	3.9596e-15	6.65556e-13	24.1506	0.595902	0.251275	-0.344627	4	13542719	R	II	NKX3-2	3'UTR	shore	3'UTR-shore	chr4:13543562-13546494	NA	TRUE
cg02627286	-0.189076	0.815103	-10.602	3.99406e-15	6.70551e-13	24.142	0.909641	0.720564	-0.189076	16	89590583	R	I	SPG7	Body	shore	Body-shore	chr16:89588816-89589058	NA	NA
cg26272623	-0.258032	0.472873	-10.602	3.99433e-15	6.70551e-13	24.1419	0.601889	0.343857	-0.258032	1	119532320	F	II	TBX15	TSS200	shore	TSS200-shore	chr1:119529819-119530712	NA	TRUE
cg07487731	-0.298812	0.444754	-10.6014	4.00333e-15	6.7178e-13	24.1397	0.59416	0.295347	-0.298812	5	140616495	F	II	PCDHB18	Body	shore	Body-shore	chr5:140615391-140616353	NA	NA
cg14184780	-0.150216	0.62402	-10.6008	4.01242e-15	6.72764e-13	24.1375	0.699127	0.548912	-0.150216	9	95475751	F	I	BICD2	Body	shore	Body-shore	chr9:95477296-95477708	NA	NA
cg05533037	0.280133	0.761017	10.6007	4.01255e-15	6.72764e-13	24.1374	0.62095	0.901083	0.280133	21	32202010	R	II	KRTAP7-1	1stExon	opensea	1stExon-opensea		NA	NA
cg17165841	-0.308086	0.28307	-10.5996	4.02849e-15	6.74872e-13	24.1335	0.437113	0.129027	-0.308086	2	207507001	R	II	LOC200726	TSS200	island	TSS200-island	chr2:207506774-207507422	NA	NA
cg08584759	-0.244164	0.605391	-10.5985	4.04508e-15	6.77368e-13	24.1294	0.727474	0.483309	-0.244164	10	11912126	F	I	C10orf47	Body	island	Body-island	chr10:11911554-11912432	NA	NA		rs17851505
cg15506609	-0.331418	0.489627	-10.5969	4.06889e-15	6.80785e-13	24.1236	0.655335	0.323918	-0.331418	7	27206073	R	I	HOXA9	TSS1500	island	TSS1500-island	chr7:27203915-27206462	NA	NA			rs77936575
cg21448057	-0.369588	0.334939	-10.5968	4.07061e-15	6.8079e-13	24.1232	0.519733	0.150145	-0.369588	13	84453836	R	II	SLITRK1	1stExon	island	1stExon-island	chr13:84453664-84453897	NA	TRUE
cg06155341	0.231497	0.691679	10.5962	4.07828e-15	6.81692e-13	24.1213	0.57593	0.807427	0.231497	11	66048759	R	II	CNIH2	Body	shore	Body-shore	chr11:66049750-66050229	NA	TRUE
cg14029001	-0.251656	0.554562	-10.5947	4.10158e-15	6.84825e-13	24.1157	0.68039	0.428734	-0.251656	6	41998500	F	I	CCND3	5'UTR	opensea	5'UTR-opensea		NA	TRUE
cg23985374	-0.187223	0.742617	-10.5929	4.12735e-15	6.88841e-13	24.1094	0.836229	0.649005	-0.187223	5	140240941	R	II	PCDHA6	Body	shore	Body-shore	chr5:140242073-140243007	NA	NA			rs79040493
cg10843343	0.159649	0.476209	10.5911	4.15509e-15	6.93183e-13	24.1028	0.396385	0.556033	0.159649	12	53298027	R	I	KRT8	Body	shore	Body-shore	chr12:53297442-53297824	TRUE	TRUE
cg16546442	-0.267383	0.42002	-10.5903	4.1672e-15	6.94623e-13	24.0999	0.553711	0.286329	-0.267383	4	111539907	R	II	PITX2	Body	island	Body-island	chr4:111539906-111540127	NA	TRUE
cg03740025	-0.130841	0.83894	-10.5894	4.18006e-15	6.96096e-13	24.0969	0.90436	0.773519	-0.130841	7	127340829	F	II	SND1	Body	opensea	Body-opensea		NA	TRUE		rs60006677
cg00084338	-0.35354	0.456386	-10.5894	4.18064e-15	6.96096e-13	24.0967	0.633156	0.279616	-0.35354	6	170595920	F	I	DLL1	Body	shore	Body-shore	chr6:170597246-170597499	NA	NA			rs7759322
cg21931656	0.132097	0.131856	10.5893	4.18124e-15	6.96096e-13	24.0966	0.0658075	0.197905	0.132097	11	72462963	F	II	ARAP1	5'UTR	shore	5'UTR-shore	chr11:72463092-72463717	NA	NA
cg13449377	-0.17849	0.80676	-10.589	4.18583e-15	6.96571e-13	24.0955	0.896005	0.717515	-0.17849	7	96631089	F	II	DLX6AS	Body	shore	Body-shore	chr7:96631383-96631800	NA	TRUE
cg21582373	-0.237395	0.565132	-10.5868	4.21923e-15	7.01837e-13	24.0876	0.683829	0.446434	-0.237395	11	31818474	F	II	PAX6	Body	shore	Body-shore	chr11:31820060-31821416	NA	NA
cg00585714	-0.227708	0.419928	-10.5857	4.23655e-15	7.04425e-13	24.0836	0.533782	0.306074	-0.227708	8	97156859	F	II	GDF6	Body	island	Body-island	chr8:97156763-97158030	NA	TRUE
cg15994467	-0.344413	0.527071	-10.5845	4.2541e-15	7.0705e-13	24.0795	0.699278	0.354864	-0.344413	12	52401523	F	II	GRASP	Body	island	Body-island	chr12:52400467-52401696	TRUE	NA		rs2603742
cg01109169	-0.340799	0.370229	-10.5841	4.26027e-15	7.07782e-13	24.078	0.540628	0.199829	-0.340799	2	71134630	F	II	VAX2	Body	island	Body-island	chr2:71134585-71134792	NA	TRUE
cg04650899	0.132533	0.137384	10.5836	4.26886e-15	7.08916e-13	24.076	0.0711174	0.203651	0.132533	17	48194835	R	I	SAMD14	Body	island	Body-island	chr17:48194634-48195085	TRUE	NA
cg22657492	-0.168477	0.755674	-10.5826	4.28411e-15	7.11153e-13	24.0725	0.839912	0.671435	-0.168477	5	137593488	R	I	GFRA3	Body	island	Body-island	chr5:137593335-137593584	NA	NA
cg18150584	-0.283503	0.47058	-10.5809	4.31024e-15	7.14831e-13	24.0665	0.612331	0.328829	-0.283503	1	23887816	F	II	ID3	TSS1500	shore	TSS1500-shore	chr1:23885682-23886212	NA	NA		rs57350441
cg23621013	0.281905	0.562908	10.5779	4.35754e-15	7.22071e-13	24.0556	0.421955	0.70386	0.281905	7	135433353	F	II	FAM180A	1stExon	opensea	1stExon-opensea		NA	TRUE
cg06544111	-0.436219	0.400975	-10.5773	4.36725e-15	7.23157e-13	24.0534	0.619084	0.182865	-0.436219	7	27281344	R	II	EVX1	TSS1500	shore	TSS1500-shore	chr7:27282086-27283136	NA	TRUE
cg07256668	-0.0940791	0.837882	-10.5759	4.38872e-15	7.26411e-13	24.0486	0.884922	0.790843	-0.0940791	11	64398137	F	I	NRXN2	Body	shore	Body-shore	chr11:64397644-64398016	NA	NA
cg18911817	0.206645	0.43424	10.5736	4.42568e-15	7.31623e-13	24.0402	0.330918	0.537563	0.206645	5	1010925	F	I	NKD2	Body	shore	Body-shore	chr5:1008715-1010039	NA	TRUE		rs6885390
cg14557690	0.271491	0.729461	10.5728	4.43922e-15	7.33558e-13	24.0372	0.593716	0.865206	0.271491	9	139978293	F	II	UAP1L1	3'UTR	shelf	3'UTR-shelf	chr9:139980377-139981887	TRUE	TRUE
cg17160439	-0.210487	0.706507	-10.5722	4.44779e-15	7.34321e-13	24.0353	0.811751	0.601263	-0.210487	11	64815744	F	II	NAALADL1	Body	shore	Body-shore	chr11:64815040-64815722	TRUE	NA
cg10180367	-0.131033	0.827995	-10.5722	4.44836e-15	7.34321e-13	24.0352	0.893512	0.762478	-0.131033	19	34808158	R	II	KIAA0355	Body	opensea	Body-opensea		NA	TRUE
cg16166968	-0.250047	0.614949	-10.5719	4.45319e-15	7.34655e-13	24.0341	0.739973	0.489926	-0.250047	1	120439036	R	II	ADAM30	1stExon	island	1stExon-island	chr1:120439013-120439220	NA	NA
cg14042308	0.253904	0.536179	10.5707	4.47291e-15	7.37605e-13	24.0297	0.409227	0.663131	0.253904	11	66104468	F	II	RIN1	TSS1500	shelf	TSS1500-shelf	chr11:66102024-66102279	NA	NA
cg16579438	0.172242	0.310042	10.5677	4.52084e-15	7.44569e-13	24.0191	0.223921	0.396163	0.172242	3	24537301	R	I	THRB	TSS1500	island	TSS1500-island	chr3:24535844-24537436	TRUE	NA
cg19416570	-0.252868	0.447293	-10.5675	4.5241e-15	7.44569e-13	24.0184	0.573727	0.320859	-0.252868	19	58715677	R	I	ZNF274	Body	island	Body-island	chr19:58715220-58716033	NA	NA
cg14911690	0.110727	0.139036	10.5675	4.52443e-15	7.44569e-13	24.0184	0.0836729	0.1944	0.110727	19	19729395	R	I	PBX4	1stExon	island	1stExon-island	chr19:19729127-19729814	NA	TRUE
cg24599107	-0.116573	0.8302	-10.5673	4.52709e-15	7.44689e-13	24.0178	0.888486	0.771913	-0.116573	1	161049443	F	I	PVRL4	Body	island	Body-island	chr1:161049346-161049737	NA	NA
cg01399319	-0.111365	0.885871	-10.5672	4.52888e-15	7.44689e-13	24.0174	0.941554	0.830189	-0.111365	1	1326204	R	II	CCNL2	Body	shelf	Body-shelf	chr1:1322644-1322924	NA	NA
cg23840027	-0.174309	0.765164	-10.5657	4.55325e-15	7.4819e-13	24.0121	0.852318	0.678009	-0.174309	1	29225533	R	II	EPB41	5'UTR	opensea	5'UTR-opensea		NA	TRUE
cg07345515	0.279146	0.605045	10.5648	4.56898e-15	7.5036e-13	24.0086	0.465472	0.744618	0.279146	6	32054771	F	II	TNXB	Body	shore	Body-shore	chr6:32055067-32055601	TRUE	TRUE
cg00929376	-0.254518	0.56823	-10.56	4.64784e-15	7.61675e-13	23.9917	0.695488	0.440971	-0.254518	1	25258236	F	II	RUNX3	TSS1500	island	TSS1500-island	chr1:25255527-25259005	NA	NA		rs3116868
cg10703826	-0.340114	0.310156	-10.56	4.64906e-15	7.61675e-13	23.9914	0.480213	0.140098	-0.340114	1	119532116	F	I	TBX15	1stExon	island	1stExon-island	chr1:119531991-119532196	NA	TRUE		rs73011341
cg22455694	-0.270844	0.337882	-10.56	4.64928e-15	7.61675e-13	23.9914	0.473304	0.20246	-0.270844	2	176974001	R	II	HOXD11	3'UTR	shore	3'UTR-shore	chr2:176971706-176972305	NA	NA
cg20050826	-0.296098	0.474507	-10.5592	4.66166e-15	7.6339e-13	23.9887	0.622556	0.326458	-0.296098	12	52995295	F	II	KRT72	1stExon	island	1stExon-island	chr12:52994772-52995312	NA	NA
cg18525486	-0.362986	0.388749	-10.5578	4.685e-15	7.66898e-13	23.9838	0.570242	0.207256	-0.362986	3	62357176	R	II	FEZF2	Body	island	Body-island	chr3:62356773-62357315	NA	NA
cg03928812	0.331371	0.590235	10.5573	4.69333e-15	7.67635e-13	23.982	0.424549	0.75592	0.331371	11	59634276	R	II	TCN1	TSS1500	opensea	TSS1500-opensea		NA	NA
cg16620283	-0.170908	0.83774	-10.5558	4.72002e-15	7.71072e-13	23.9764	0.923194	0.752286	-0.170908	2	203155849	F	II	SNORD11B	TSS200	opensea	TSS200-opensea		NA	NA
cg14349667	-0.322918	0.304745	-10.5558	4.72012e-15	7.71072e-13	23.9764	0.466204	0.143286	-0.322918	4	81189706	R	I	FGF5	Body	shore	Body-shore	chr4:81187494-81187913	NA	NA
cg12252069	-0.357637	0.46284	-10.5545	4.74117e-15	7.73881e-13	23.972	0.641658	0.284021	-0.357637	7	26897597	R	II	SKAP2	Body	opensea	Body-opensea		NA	TRUE
cg19370054	-0.396439	0.278039	-10.5514	4.79479e-15	7.81996e-13	23.9608	0.476258	0.0798191	-0.396439	2	98964186	F	II	CNGA3	5'UTR	island	5'UTR-island	chr2:98962873-98964187	NA	TRUE
cg14262937	-0.320633	0.293348	-10.5467	4.87658e-15	7.93719e-13	23.944	0.453664	0.133032	-0.320633	6	154360351	R	II	OPRM1	TSS200	shore	TSS200-shore	chr6:154360586-154361008	NA	NA
cg04100397	-0.11633	0.842472	-10.5422	4.95715e-15	8.06179e-13	23.9278	0.900636	0.784307	-0.11633	2	110875551	F	II	MALL	TSS1500	shore	TSS1500-shore	chr2:110872945-110873587	NA	NA
cg11940285	-0.365899	0.285435	-10.5398	5.0003e-15	8.11877e-13	23.9192	0.468385	0.102486	-0.365899	3	129693385	F	I	TRH	5'UTR	island	5'UTR-island	chr3:129693127-129694841	NA	NA		rs9860093
cg18303242	0.323327	0.789257	10.5395	5.00517e-15	8.1234e-13	23.9182	0.627594	0.950921	0.323327	17	25879250	R	II	KSR1	5'UTR	opensea	5'UTR-opensea		NA	TRUE
cg24641186	-0.323306	0.487185	-10.5388	5.01775e-15	8.13723e-13	23.9157	0.648838	0.325531	-0.323306	6	50804147	R	II	TFAP2B	Body	opensea	Body-opensea		NA	NA
cg18110444	0.149711	0.161607	10.5378	5.03643e-15	8.16315e-13	23.912	0.0867516	0.236462	0.149711	2	136743460	F	I	DARS	TSS1500	island	TSS1500-island	chr2:136742687-136743595	NA	NA		rs2278683
cg27176870	0.0731456	0.0710489	10.5371	5.04967e-15	8.16915e-13	23.9094	0.0344761	0.107622	0.0731456	19	38754930	F	I	SPINT2	TSS200	island	TSS200-island	chr19:38754846-38755699	TRUE	NA		rs17554832
cg21635870	-0.260314	0.237046	-10.5343	5.10059e-15	8.2482e-13	23.8995	0.367203	0.106889	-0.260314	6	101847058	R	I	GRIK2	1stExon	island	1stExon-island	chr6:101846766-101847135	NA	NA
cg05350879	-0.129194	0.838826	-10.533	5.12471e-15	8.27961e-13	23.8948	0.903423	0.774229	-0.129194	4	88451223	F	II	SPARCL1	TSS1500	opensea	TSS1500-opensea		NA	NA			rs77416213
cg00456892	-0.253136	0.299371	-10.5329	5.12621e-15	8.27961e-13	23.8945	0.425939	0.172802	-0.253136	11	124629925	R	I	ESAM	Body	island	Body-island	chr11:124629723-124629926	NA	NA
cg00654888	-0.25237	0.466595	-10.5322	5.1393e-15	8.2974e-13	23.892	0.59278	0.34041	-0.25237	2	119603133	F	II	EN1	Body	island	Body-island	chr2:119602616-119604486	NA	NA		rs73948209
cg27246129	-0.299094	0.451033	-10.5316	5.15012e-15	8.31152e-13	23.8899	0.60058	0.301486	-0.299094	6	170595947	F	I	DLL1	Body	shore	Body-shore	chr6:170597246-170597499	NA	TRUE
cg18423469	0.266593	0.755744	10.5312	5.15824e-15	8.32128e-13	23.8883	0.622448	0.88904	0.266593	18	3726858	F	II	DLGAP1	Body	shelf	Body-shelf	chr18:3729123-3729406	NA	NA		rs74530565
cg17372758	0.275002	0.48313	10.5306	5.17006e-15	8.33363e-13	23.8861	0.345629	0.620631	0.275002	10	73976798	R	I	ASCC1	TSS1500	shore	TSS1500-shore	chr10:73975671-73976115	NA	NA
cg00629625	0.24765	0.662469	10.5304	5.17368e-15	8.33401e-13	23.8854	0.538644	0.786294	0.24765	20	44663630	F	II	SLC12A5	Body	shelf	Body-shelf	chr20:44660342-44660948	NA	NA
cg01383890	0.132974	0.130301	10.5303	5.17445e-15	8.33401e-13	23.8852	0.0638143	0.196788	0.132974	15	62358982	F	II	C2CD4A	TSS200	shore	TSS200-shore	chr15:62359827-62360995	NA	NA
cg17083575	-0.283034	0.551359	-10.5301	5.17818e-15	8.33666e-13	23.8845	0.692876	0.409842	-0.283034	7	4746131	F	II	FOXK1	Body	opensea	Body-opensea		NA	TRUE
cg07440775	-0.285384	0.443872	-10.5266	5.24538e-15	8.43807e-13	23.8717	0.586564	0.30118	-0.285384	10	26507383	R	II	GAD2	Body	island	Body-island	chr10:26504383-26507434	NA	NA
cg24348240	0.190904	0.283444	10.5239	5.29729e-15	8.51474e-13	23.862	0.187992	0.378896	0.190904	1	26611453	R	I	UBXN11	Body	opensea	Body-opensea		NA	NA
cg14006181	-0.250676	0.332729	-10.5237	5.29956e-15	8.51498e-13	23.8615	0.458067	0.207391	-0.250676	14	29254942	F	I	C14orf23	Body	island	Body-island	chr14:29254365-29255069	NA	NA		rs17631065
cg02457319	0.240743	0.543167	10.5229	5.31536e-15	8.53694e-13	23.8586	0.422795	0.663539	0.240743	9	138671108	F	II	KCNT1	Body	shore	Body-shore	chr9:138672734-138672970	NA	NA		rs71508813
cg12259792	-0.18541	0.448359	-10.5205	5.36187e-15	8.60475e-13	23.8499	0.541064	0.355654	-0.18541	17	40442580	F	II	STAT5A	Body	shore	Body-shore	chr17:40440188-40441014	NA	NA
cg08927006	-0.266981	0.304842	-10.5203	5.36669e-15	8.60903e-13	23.8491	0.438333	0.171352	-0.266981	10	100993556	R	I	HPSE2	Body	shore	Body-shore	chr10:100993820-100994188	NA	TRUE	low-CpG:100983425-100983697
cg24856726	-0.398336	0.275531	-10.5178	5.4142e-15	8.67482e-13	23.8403	0.474699	0.0763628	-0.398336	12	108169333	F	II	ASCL4	1stExon	island	1stExon-island	chr12:108168986-108169570	NA	TRUE
cg05452066	-0.153574	0.849251	-10.5157	5.45504e-15	8.72861e-13	23.8329	0.926038	0.772464	-0.153574	5	138298086	F	II	SIL1	Body	opensea	Body-opensea		NA	TRUE
cg21808448	-0.112191	0.857863	-10.5157	5.45648e-15	8.72861e-13	23.8326	0.913958	0.801767	-0.112191	1	39859609	F	II	MACF1	Body	opensea	Body-opensea		NA	TRUE
cg05277504	0.256341	0.761046	10.5117	5.53464e-15	8.84305e-13	23.8185	0.632876	0.889217	0.256341	17	79961614	F	I	ASPSCR1	Body	island	Body-island	chr17:79961577-79961857	TRUE	NA
cg11411705	-0.241584	0.455396	-10.5104	5.56112e-15	8.88181e-13	23.8138	0.576188	0.334604	-0.241584	10	82246287	F	II	TSPAN14	5'UTR	opensea	5'UTR-opensea		NA	TRUE
cg24895178	-0.235354	0.701696	-10.5092	5.58537e-15	8.91343e-13	23.8094	0.819373	0.584019	-0.235354	17	14207927	R	II	HS3ST3B1	Body	shore	Body-shore	chr17:14204168-14207702	NA	NA
cg01793445	0.276177	0.581755	10.5073	5.62478e-15	8.97076e-13	23.8025	0.443666	0.719844	0.276177	1	167632415	R	II	RCSD1	Body	opensea	Body-opensea		NA	TRUE
cg16692227	-0.15425	0.799115	-10.5072	5.62577e-15	8.97076e-13	23.8023	0.87624	0.72199	-0.15425	8	119567541	R	II	SAMD12	Body	opensea	Body-opensea		NA	TRUE
cg18181201	-0.420493	0.321986	-10.507	5.63149e-15	8.97632e-13	23.8013	0.532232	0.11174	-0.420493	1	242686709	R	II	PLD5	5'UTR	shore	5'UTR-shore	chr1:242686916-242687476	NA	NA
cg07454556	-0.113231	0.853435	-10.5068	5.63397e-15	8.9767e-13	23.8009	0.91005	0.796819	-0.113231	2	54754901	F	II	RPL23AP32	TSS1500	opensea	TSS1500-opensea		NA	NA
cg27360326	-0.347659	0.253701	-10.5066	5.63881e-15	8.98084e-13	23.8	0.42753	0.0798716	-0.347659	13	53422691	R	I	PCDH8	1stExon	island	1stExon-island	chr13:53419897-53422872	TRUE	TRUE
cg13300273	-0.39648	0.356072	-10.5061	5.64849e-15	8.98389e-13	23.7983	0.554312	0.157832	-0.39648	1	200842890	F	I	GPR25	1stExon	island	1stExon-island	chr1:200842196-200843388	NA	TRUE
cg23712018	-0.184835	0.382577	-10.5058	5.65556e-15	8.98965e-13	23.7971	0.474994	0.290159	-0.184835	6	30039132	F	I	RNF39	Body	island	Body-island	chr6:30038881-30039477	NA	NA			rs9261293
cg06211255	0.206487	0.353462	10.5056	5.65944e-15	8.99225e-13	23.7964	0.250219	0.456706	0.206487	11	65153842	R	II	FRMD8	TSS200	island	TSS200-island	chr11:65153726-65154606	NA	NA
cg15952370	0.285077	0.572486	10.5045	5.68114e-15	9.02314e-13	23.7926	0.429948	0.715025	0.285077	11	124190997	R	II	OR8D2	TSS1500	opensea	TSS1500-opensea		NA	NA
cg00298065	-0.237098	0.699872	-10.5038	5.69677e-15	9.04439e-13	23.7899	0.818421	0.581323	-0.237098	19	58715577	R	II	ZNF274	Body	island	Body-island	chr19:58715220-58716033	NA	NA
cg21338225	-0.343706	0.546817	-10.5027	5.71785e-15	9.07426e-13	23.7862	0.71867	0.374964	-0.343706	7	30179748	F	II	C7orf41	Body	shelf	Body-shelf	chr7:30174230-30176169	NA	NA
cg03026306	0.195945	0.207536	10.5021	5.73098e-15	9.0915e-13	23.7839	0.109563	0.305508	0.195945	18	21718767	F	II	CABYR	TSS200	shore	TSS200-shore	chr18:21718862-21719550	TRUE	NA		rs75141028
cg13224914	-0.126903	0.84596	-10.5001	5.7737e-15	9.15564e-13	23.7766	0.909412	0.782509	-0.126903	10	12750368	F	II	CAMK1D	Body	opensea	Body-opensea		NA	TRUE		rs1007553
cg10723711	0.184752	0.330085	10.4993	5.78999e-15	9.17784e-13	23.7738	0.237708	0.422461	0.184752	17	7348379	F	I	CHRNB1	TSS200	island	TSS200-island	chr17:7348274-7348830	TRUE	NA	high-CpG:7289048-7289566		rs76736363
cg24006721	-0.227765	0.389431	-10.4976	5.82466e-15	9.22915e-13	23.7678	0.503314	0.275549	-0.227765	1	25258225	F	I	RUNX3	TSS1500	island	TSS1500-island	chr1:25255527-25259005	NA	NA		rs3116868
cg27214774	-0.156378	0.796522	-10.4974	5.82876e-15	9.23005e-13	23.7671	0.874711	0.718334	-0.156378	20	49253710	F	II	FAM65C	TSS1500	opensea	TSS1500-opensea		NA	NA
cg17863076	0.243431	0.573435	10.4969	5.83989e-15	9.24232e-13	23.7653	0.451719	0.69515	0.243431	2	79312664	R	II	REG1B	Body	opensea	Body-opensea		NA	NA
cg15665400	0.23381	0.214736	10.4958	5.86367e-15	9.27629e-13	23.7612	0.097831	0.331641	0.23381	2	133428652	F	II	LYPD1	TSS200	island	TSS200-island	chr2:133426652-133428870	TRUE	NA		rs2709538
cg12346967	0.292508	0.755263	10.4947	5.88625e-15	9.30467e-13	23.7574	0.609009	0.901517	0.292508	21	32185331	F	II	KRTAP8-1	1stExon	opensea	1stExon-opensea		NA	NA		rs74429119
cg00184452	-0.237448	0.42197	-10.4945	5.89093e-15	9.30838e-13	23.7566	0.540694	0.303246	-0.237448	1	50887477	F	II	DMRTA2	5'UTR	island	5'UTR-island	chr1:50884228-50891471	NA	NA
cg18121003	-0.351335	0.300796	-10.4924	5.93551e-15	9.37144e-13	23.7491	0.476463	0.125128	-0.351335	11	86085757	F	I	CCDC81	TSS200	island	TSS200-island	chr11:86085693-86086006	NA	TRUE
cg05942022	0.292231	0.702033	10.4879	6.03405e-15	9.51952e-13	23.7328	0.555918	0.848148	0.292231	1	43402591	F	II	SLC2A1	Body	opensea	Body-opensea		TRUE	TRUE		rs78925955
cg00621646	0.259862	0.642905	10.4869	6.05626e-15	9.5508e-13	23.7292	0.512974	0.772836	0.259862	11	123849141	R	II	OR10S1	TSS1500	opensea	TSS1500-opensea		NA	NA
cg15628956	0.176275	0.143164	10.4846	6.10714e-15	9.62346e-13	23.7209	0.0550269	0.231302	0.176275	12	53448234	R	II	TENC1	Body	island	Body-island	chr12:53448008-53448406	NA	NA
cg09732036	0.275862	0.704413	10.482	6.16462e-15	9.70619e-13	23.7116	0.566482	0.842344	0.275862	20	9511102	F	II	C20orf103	3'UTR	opensea	3'UTR-opensea		NA	NA
cg04917391	0.213865	0.382128	10.4818	6.16909e-15	9.70619e-13	23.7109	0.275195	0.48906	0.213865	4	40859259	F	I	APBB2	Body	shore	Body-shore	chr4:40858884-40859162	TRUE	TRUE	high-CpG:40553838-40554026
cg06476693	0.25564	0.713236	10.4803	6.20146e-15	9.74145e-13	23.7057	0.585415	0.841056	0.25564	11	130283454	F	II	ADAMTS8	Body	opensea	Body-opensea		TRUE	TRUE
cg26025557	-0.144466	0.855624	-10.4789	6.23273e-15	9.78289e-13	23.7007	0.927857	0.783391	-0.144466	3	42842344	F	II	HIGD1A	Body	shelf	Body-shelf	chr3:42845436-42846355	NA	NA
cg20975733	0.257837	0.584476	10.4782	6.24841e-15	9.80367e-13	23.6982	0.455558	0.713394	0.257837	15	87155056	F	II	AGBL1	Body	opensea	Body-opensea		NA	TRUE
cg14604681	-0.254668	0.481555	-10.4772	6.27178e-15	9.83649e-13	23.6945	0.608889	0.354222	-0.254668	2	63283355	R	II	OTX1	Body	shore	Body-shore	chr2:63283936-63284147	NA	NA
cg12556823	0.286644	0.811697	10.4771	6.2751e-15	9.83784e-13	23.694	0.668375	0.955019	0.286644	6	21023485	F	II	CDKAL1	Body	opensea	Body-opensea		NA	TRUE
cg21627409	-0.305133	0.313492	-10.4743	6.33743e-15	9.92392e-13	23.6842	0.466059	0.160925	-0.305133	5	140810106	F	I	PCDHGA4	Body	shore	Body-shore	chr5:140810494-140812617	TRUE	NA	low-CpG:140790256-140790651
cg00963169	-0.287773	0.216621	-10.4726	6.37663e-15	9.98139e-13	23.6781	0.360507	0.072734	-0.287773	1	50513927	F	I	ELAVL4	Body	island	Body-island	chr1:50513644-50514320	NA	TRUE
cg01515508	-0.149356	0.819332	-10.4712	6.41025e-15	1.00262e-12	23.6728	0.89401	0.744654	-0.149356	1	10728270	R	I	CASZ1	Body	shelf	Body-shelf	chr1:10725187-10725617	NA	NA
cg08781738	-0.142954	0.836936	-10.4711	6.4132e-15	1.00269e-12	23.6724	0.908413	0.765459	-0.142954	8	117876328	R	II	RAD21	Body	opensea	Body-opensea		NA	TRUE
cg16758800	-0.315768	0.451623	-10.4708	6.41838e-15	1.00279e-12	23.6716	0.609507	0.293739	-0.315768	7	96631902	R	II	DLX6AS	Body	shore	Body-shore	chr7:96631383-96631800	NA	NA
cg24164786	-0.209808	0.69397	-10.4708	6.41887e-15	1.00279e-12	23.6715	0.798874	0.589066	-0.209808	14	75018906	F	II	LTBP2	Body	opensea	Body-opensea		NA	TRUE
cg25166437	-0.246572	0.487833	-10.4699	6.44026e-15	1.00574e-12	23.6682	0.611119	0.364547	-0.246572	17	1549284	F	II	SCARF1	TSS1500	shore	TSS1500-shore	chr17:1546742-1547324	NA	NA		rs78988476
cg06155414	-0.15939	0.800661	-10.4692	6.45746e-15	1.00778e-12	23.6656	0.880356	0.720966	-0.15939	13	97893311	R	II	MBNL2	5'UTR	opensea	5'UTR-opensea		NA	TRUE
cg02875879	-0.129514	0.831955	-10.4691	6.45832e-15	1.00778e-12	23.6654	0.896712	0.767198	-0.129514	4	113569394	R	II	MIR302A	Body	opensea	Body-opensea		NA	NA
cg18872604	0.097182	0.228491	10.4687	6.46758e-15	1.00824e-12	23.664	0.1799	0.277082	0.097182	11	64002754	R	I	VEGFB	Body	shore	Body-shore	chr11:64001572-64002712	TRUE	NA
cg22454022	0.197581	0.268425	10.468	6.48506e-15	1.01038e-12	23.6613	0.169635	0.367215	0.197581	8	69646661	F	II	C8orf34	Body	opensea	Body-opensea		NA	TRUE
cg17353412	-0.32938	0.465843	-10.4664	6.52138e-15	1.01564e-12	23.6558	0.630533	0.301154	-0.32938	7	27141774	R	I	HOXA2	1stExon	shore	1stExon-shore	chr7:27143181-27143479	NA	NA
cg05318454	0.285497	0.462834	10.4648	6.56107e-15	1.02103e-12	23.6498	0.320086	0.605583	0.285497	19	46117805	R	II	EML2	Body	shore	Body-shore	chr19:46119454-46119815	TRUE	TRUE
cg09578475	-0.376115	0.362389	-10.4646	6.56439e-15	1.02115e-12	23.6493	0.550446	0.174331	-0.376115	19	9473688	F	I	ZNF177	TSS200	island	TSS200-island	chr19:9473589-9474001	NA	NA
cg19456540	-0.350086	0.223252	-10.464	6.57816e-15	1.02289e-12	23.6472	0.398295	0.0482093	-0.350086	14	60976285	F	I	SIX6	1stExon	island	1stExon-island	chr14:60975732-60978180	NA	TRUE
cg10745499	-0.287357	0.525921	-10.4636	6.58808e-15	1.02404e-12	23.6457	0.6696	0.382243	-0.287357	6	100906685	F	II	SIM1	Body	island	Body-island	chr6:100905952-100906686	NA	NA
cg09159452	-0.309355	0.67947	-10.4622	6.62201e-15	1.02817e-12	23.6406	0.834148	0.524793	-0.309355	7	2609861	R	I	IQCE	Body	opensea	Body-opensea		NA	NA
cg08844900	-0.150388	0.666166	-10.4575	6.73587e-15	1.04417e-12	23.6237	0.74136	0.590971	-0.150388	3	129326790	R	II	PLXND1	TSS1500	shore	TSS1500-shore	chr3:129323915-129325332	NA	NA
cg04097131	-0.219892	0.780485	-10.4573	6.74221e-15	1.04475e-12	23.6228	0.890431	0.670539	-0.219892	6	15298461	F	II	JARID2	Body	opensea	Body-opensea		NA	TRUE
cg16783744	-0.306908	0.280002	-10.4552	6.79193e-15	1.05164e-12	23.6155	0.433456	0.126548	-0.306908	8	105478855	R	I	DPYS	Body	island	Body-island	chr8:105478672-105479340	NA	NA
cg09627520	-0.201886	0.680874	-10.4549	6.79963e-15	1.05243e-12	23.6144	0.781816	0.579931	-0.201886	3	58410836	R	II	PXK	3'UTR	opensea	3'UTR-opensea		NA	NA
cg07895132	-0.285045	0.481359	-10.4544	6.81266e-15	1.05335e-12	23.6125	0.623882	0.338837	-0.285045	17	33825172	R	I	SLFN12L	Body	opensea	Body-opensea		NA	NA
cg03789645	-0.41073	0.300448	-10.4543	6.81449e-15	1.05335e-12	23.6122	0.505813	0.0950829	-0.41073	7	148394842	R	II	CUL1	TSS1500	shore	TSS1500-shore	chr7:148395430-148397002	NA	NA			rs6959365
cg16526732	0.2727	0.66369	10.4542	6.81611e-15	1.05335e-12	23.612	0.52734	0.80004	0.2727	12	95598159	R	II	FGD6	Body	opensea	Body-opensea		NA	TRUE
cg26692873	-0.13062	0.823864	-10.4536	6.83238e-15	1.05505e-12	23.6096	0.889174	0.758554	-0.13062	6	25417079	F	II	LRRC16A	Body	opensea	Body-opensea		NA	TRUE		rs56139105
cg12592365	0.354925	0.566404	10.4512	6.89107e-15	1.0633e-12	23.6011	0.388942	0.743867	0.354925	17	78765948	F	II	RPTOR	Body	opensea	Body-opensea		TRUE	TRUE		rs61521042	rs75467749
cg16080125	-0.148237	0.589783	-10.4492	6.94143e-15	1.07066e-12	23.5939	0.663902	0.515664	-0.148237	7	2774654	R	I	GNA12	Body	island	Body-island	chr7:2774444-2774655	NA	NA
cg07318128	-0.19573	0.805476	-10.4484	6.96144e-15	1.07333e-12	23.591	0.903341	0.707611	-0.19573	17	46683806	F	II	HOXB6	TSS1500	shore	TSS1500-shore	chr17:46685244-46685449	NA	NA		rs9903182
cg16528895	-0.333188	0.513602	-10.4464	7.01212e-15	1.08031e-12	23.5838	0.680196	0.347008	-0.333188	2	108994311	R	II	SULT1C4	TSS200	opensea	TSS200-opensea		NA	TRUE			rs6739225
cg01340163	-0.221928	0.575372	-10.4438	7.08022e-15	1.08913e-12	23.5743	0.686337	0.464408	-0.221928	4	55990582	F	II	KDR	Body	shore	Body-shore	chr4:55991402-55992171	NA	NA
cg20725239	0.262069	0.694441	10.4428	7.10579e-15	1.09264e-12	23.5707	0.563407	0.825475	0.262069	11	124805963	R	II	HEPACAM	5'UTR	opensea	5'UTR-opensea		NA	NA	low-CpG:124311077-124311574
cg27399481	-0.122302	0.821037	-10.4402	7.17146e-15	1.10232e-12	23.5616	0.882188	0.759886	-0.122302	17	78069245	R	I	CCDC40	Body	opensea	Body-opensea		NA	NA
cg05485137	-0.297751	0.309988	-10.4399	7.18094e-15	1.10335e-12	23.5602	0.458863	0.161112	-0.297751	10	28035864	R	I	MKX	TSS1500	shore	TSS1500-shore	chr10:28030182-28035211	NA	NA
cg14082127	-0.357593	0.333635	-10.4374	7.24495e-15	1.11191e-12	23.5514	0.512432	0.154839	-0.357593	6	101847349	F	II	GRIK2	Body	shore	Body-shore	chr6:101846766-101847135	NA	NA
cg05425602	-0.237458	0.767454	-10.4372	7.25e-15	1.11226e-12	23.5508	0.886183	0.648726	-0.237458	8	135812896	F	II	MIR30B	TSS200	opensea	TSS200-opensea		NA	NA		rs71834472
cg00018128	-0.30159	0.291815	-10.4366	7.26684e-15	1.11441e-12	23.5485	0.442609	0.14102	-0.30159	2	162275746	F	I	TBR1	Body	shore	Body-shore	chr2:162275161-162275596	NA	NA
cg00525823	-0.288744	0.362412	-10.4364	7.2721e-15	1.11479e-12	23.5477	0.506784	0.21804	-0.288744	18	11148510	F	II	FAM38B	Body	island	Body-island	chr18:11148307-11149936	NA	NA
cg12233363	-0.261796	0.324022	-10.4354	7.29723e-15	1.11779e-12	23.5443	0.45492	0.193124	-0.261796	6	100913030	R	I	SIM1	TSS1500	island	TSS1500-island	chr6:100912071-100913337	TRUE	NA
cg08942939	-0.396831	0.333746	-10.4334	7.35052e-15	1.12509e-12	23.5371	0.532161	0.135331	-0.396831	1	119532542	F	II	TBX15	TSS1500	shore	TSS1500-shore	chr1:119529819-119530712	NA	NA
cg12467749	-0.365359	0.25491	-10.4332	7.3572e-15	1.12569e-12	23.5362	0.437589	0.0722299	-0.365359	7	35294430	R	II	TBX20	TSS1500	island	TSS1500-island	chr7:35292985-35294674	NA	NA
cg13445177	0.300108	0.596117	10.4328	7.36801e-15	1.12691e-12	23.5347	0.446063	0.74617	0.300108	1	151967021	R	II	S100A10	TSS1500	shore	TSS1500-shore	chr1:151965657-151966387	NA	NA
cg02388453	-0.293909	0.636495	-10.4325	7.37528e-15	1.12759e-12	23.5338	0.783449	0.489541	-0.293909	15	37084662	R	I	C15orf41	Body	opensea	Body-opensea		NA	TRUE
cg23684410	0.314624	0.440226	10.4303	7.43427e-15	1.13574e-12	23.5259	0.282914	0.597538	0.314624	11	116897558	R	II	SIK3	Body	opensea	Body-opensea		NA	TRUE
cg06564232	-0.358838	0.370389	-10.4298	7.44825e-15	1.13745e-12	23.524	0.549807	0.19097	-0.358838	6	50810993	F	II	TFAP2B	Body	island	Body-island	chr6:50810642-50810994	NA	NA		rs78820711
cg16443812	-0.375984	0.261659	-10.4293	7.46048e-15	1.13888e-12	23.5224	0.449651	0.0736667	-0.375984	22	50987294	R	II	KLHDC7B	1stExon	island	1stExon-island	chr22:50984972-50988141	NA	NA			rs5770886
cg25515317	-0.118374	0.881782	-10.4261	7.54787e-15	1.15134e-12	23.5108	0.940969	0.822595	-0.118374	7	116164108	R	II	CAV1	TSS1500	shore	TSS1500-shore	chr7:116164703-116166735	NA	TRUE
cg10055566	-0.245483	0.552416	-10.425	7.57807e-15	1.15551e-12	23.5069	0.675157	0.429674	-0.245483	6	28227220	F	II	NKAPL	1stExon	island	1stExon-island	chr6:28226979-28227483	NA	NA
cg03362667	-0.0934924	0.878201	-10.4247	7.58595e-15	1.15627e-12	23.5058	0.924948	0.831455	-0.0934924	15	85928046	F	II	AKAP13	5'UTR	shelf	5'UTR-shelf	chr15:85923604-85924680	NA	NA
cg17911539	-0.178813	0.539655	-10.4227	7.64257e-15	1.16313e-12	23.4985	0.629062	0.450248	-0.178813	3	126260814	F	I	CHST13	Body	island	Body-island	chr3:126260488-126261356	TRUE	NA		rs34311016
cg06952307	-0.328195	0.301517	-10.4207	7.69936e-15	1.17088e-12	23.4911	0.465615	0.13742	-0.328195	17	47287974	R	II	ABI3	5'UTR	opensea	5'UTR-opensea		NA	TRUE
cg24881420	-0.268611	0.335449	-10.42	7.71814e-15	1.1733e-12	23.4887	0.469755	0.201143	-0.268611	5	170735754	F	I	TLX3	TSS1500	island	TSS1500-island	chr5:170735169-170739863	NA	NA		rs3822663
cg01746044	0.192183	0.228017	10.4185	7.75989e-15	1.17875e-12	23.4833	0.131925	0.324109	0.192183	22	30234775	F	II	ASCC2	TSS1500	shore	TSS1500-shore	chr22:30233923-30234399	NA	NA
cg07560510	-0.329792	0.236224	-10.4182	7.76845e-15	1.1796e-12	23.4823	0.40112	0.0713277	-0.329792	8	86350592	F	II	CA3	TSS1500	shore	TSS1500-shore	chr8:86350765-86351196	NA	TRUE
cg02996583	-0.200051	0.705644	-10.4172	7.79572e-15	1.18329e-12	23.4788	0.805669	0.605618	-0.200051	8	142237188	R	I	SLC45A4	Body	island	Body-island	chr8:142237037-142237360	NA	NA			rs11783506
cg00913879	-0.183719	0.7683	-10.4164	7.819e-15	1.18593e-12	23.4758	0.860159	0.67644	-0.183719	17	76421538	R	II	DNAH17	Body	island	Body-island	chr17:76421441-76421766	NA	NA
cg18242103	-0.338023	0.396186	-10.4147	7.86644e-15	1.19267e-12	23.4698	0.565198	0.227175	-0.338023	14	52734253	F	II	PTGDR	TSS200	island	TSS200-island	chr14:52734207-52735486	NA	NA
cg06275642	-0.258049	0.435569	-10.4104	7.99042e-15	1.21101e-12	23.4543	0.564593	0.306545	-0.258049	2	68546038	F	II	CNRIP1	Body	shore	Body-shore	chr2:68546339-68547111	TRUE	NA		rs72835646
cg05382956	-0.343354	0.406521	-10.4098	8.00812e-15	1.21323e-12	23.4521	0.578198	0.234844	-0.343354	11	10627849	F	II	MRVI1	Body	opensea	Body-opensea		NA	TRUE
cg21591742	-0.377262	0.33139	-10.4086	8.04468e-15	1.21831e-12	23.4476	0.520021	0.142759	-0.377262	2	176980998	R	II	HOXD10	TSS1500	island	TSS1500-island	chr2:176980765-176981423	TRUE	NA
cg06365535	-0.304063	0.440931	-10.4063	8.11239e-15	1.2281e-12	23.4393	0.592962	0.288899	-0.304063	17	59534102	F	I	TBX4	Body	island	Body-island	chr17:59531723-59535254	NA	NA
cg13212186	0.300248	0.684956	10.4056	8.13224e-15	1.23064e-12	23.4369	0.534832	0.83508	0.300248	6	31166504	F	II	HCG27	Body	shore	Body-shore	chr6:31165412-31165923	NA	NA		rs9404982
cg02637537	-0.229706	0.671076	-10.404	8.17929e-15	1.23683e-12	23.4311	0.785929	0.556223	-0.229706	8	22447181	R	I	PDLIM2	Body	opensea	Body-opensea		NA	NA
cg14933439	0.273179	0.680947	10.4016	8.25059e-15	1.2462e-12	23.4225	0.544358	0.817537	0.273179	16	49407794	R	II	C16orf78	TSS200	opensea	TSS200-opensea		NA	NA
cg03714110	-0.296344	0.367436	-10.4012	8.26182e-15	1.247e-12	23.4212	0.515608	0.219264	-0.296344	5	92923623	F	II	NR2F1	Body	island	Body-island	chr5:92923487-92924497	NA	NA
cg23238119	-0.200759	0.655962	-10.4006	8.28079e-15	1.24935e-12	23.4189	0.756341	0.555583	-0.200759	6	74009041	F	I	C6orf147	Body	island	Body-island	chr6:74008820-74009456	NA	TRUE
cg19241878	0.25629	0.658884	10.3999	8.30234e-15	1.25213e-12	23.4163	0.530738	0.787029	0.25629	17	48846189	R	II	C17orf73	TSS1500	opensea	TSS1500-opensea		NA	NA
cg08379987	-0.249916	0.515286	-10.3997	8.30849e-15	1.25258e-12	23.4156	0.640244	0.390327	-0.249916	13	31507139	F	I	C13orf26	Body	opensea	Body-opensea		NA	TRUE		rs74043598
cg02205391	0.19188	0.24151	10.3993	8.31904e-15	1.25367e-12	23.4143	0.14557	0.33745	0.19188	6	31762409	R	II	VARS	Body	shore	Body-shore	chr6:31763240-31763905	NA	NA
cg05171693	-0.103022	0.901942	-10.3992	8.32195e-15	1.25367e-12	23.414	0.953453	0.850431	-0.103022	7	1117775	R	II	C7orf50	Body	shelf	Body-shelf	chr7:1119980-1120248	NA	NA
cg26612727	-0.245982	0.611974	-10.3962	8.41281e-15	1.26635e-12	23.4032	0.734965	0.488983	-0.245982	17	38024636	F	II	ZPBP2	1stExon	island	1stExon-island	chr17:38024145-38024637	NA	NA
cg07928083	-0.209292	0.327464	-10.3961	8.41562e-15	1.26635e-12	23.4029	0.43211	0.222818	-0.209292	15	60295312	R	I	FOXB1	TSS1500	shore	TSS1500-shore	chr15:60296135-60298520	NA	NA
cg26589669	0.202967	0.311939	10.3951	8.44712e-15	1.27062e-12	23.3992	0.210455	0.413422	0.202967	10	106028206	R	II	GSTO2	TSS1500	shore	TSS1500-shore	chr10:106028542-106029047	NA	NA
cg03234661	-0.0746778	0.927836	-10.3949	8.45456e-15	1.27126e-12	23.3983	0.965175	0.890497	-0.0746778	14	70265290	R	II	SLC10A1	TSS1500	opensea	TSS1500-opensea		NA	TRUE
cg09086835	-0.260681	0.268382	-10.3919	8.54695e-15	1.28434e-12	23.3875	0.398722	0.138041	-0.260681	15	89922345	F	I	LOC254559	Body	island	Body-island	chr15:89920793-89922768	NA	TRUE
cg26993251	0.124788	0.126652	10.3919	8.54798e-15	1.28434e-12	23.3874	0.0642579	0.189046	0.124788	11	63934014	F	I	MACROD1	TSS1500	island	TSS1500-island	chr11:63932990-63934070	NA	NA
cg08500704	-0.258203	0.683766	-10.3915	8.55993e-15	1.28487e-12	23.386	0.812867	0.554664	-0.258203	6	100060453	R	II	PRDM13	Body	shore	Body-shore	chr6:100060979-100062657	NA	NA
cg08623277	-0.32964	0.480568	-10.3913	8.5643e-15	1.28487e-12	23.3855	0.645388	0.315749	-0.32964	2	206004876	F	II	PARD3B	Body	opensea	Body-opensea		NA	TRUE
cg22282405	-0.351246	0.336628	-10.3902	8.60041e-15	1.2898e-12	23.3814	0.51225	0.161005	-0.351246	6	50810682	F	I	TFAP2B	Body	island	Body-island	chr6:50810642-50810994	NA	NA
cg06523556	0.350686	0.433992	10.3891	8.63515e-15	1.29453e-12	23.3774	0.258649	0.609335	0.350686	8	42623786	F	II	CHRNA6	TSS200	opensea	TSS200-opensea		NA	NA			rs56376656
cg04590119	0.296314	0.517485	10.3888	8.64254e-15	1.29466e-12	23.3765	0.369328	0.665642	0.296314	7	136563350	F	II	CHRM2	5'UTR	opensea	5'UTR-opensea		NA	TRUE		rs35641096
cg06534752	-0.296387	0.320779	-10.3871	8.69838e-15	1.30157e-12	23.3701	0.468972	0.172586	-0.296387	20	35448345	F	II	C20orf117	Body	shelf	Body-shelf	chr20:35443916-35444587	NA	TRUE
cg17588293	-0.257865	0.45042	-10.3863	8.72162e-15	1.30456e-12	23.3675	0.579353	0.321488	-0.257865	1	154986238	F	I	ZBTB7B	5'UTR	shelf	5'UTR-shelf	chr1:154989749-154990234	NA	NA
cg13261883	-0.296734	0.606995	-10.3858	8.73789e-15	1.30651e-12	23.3656	0.755362	0.458627	-0.296734	7	3988772	R	I	SDK1	Body	opensea	Body-opensea		NA	TRUE
cg16703762	-0.305211	0.474651	-10.384	8.79525e-15	1.31385e-12	23.3591	0.627256	0.322046	-0.305211	5	76932047	F	II	OTP	Body	shore	Body-shore	chr5:76932317-76933523	NA	NA
cg19209049	0.0815058	0.0952513	10.384	8.79686e-15	1.31385e-12	23.359	0.0544984	0.136004	0.0815058	11	69454829	F	II	CCND1	TSS1500	island	TSS1500-island	chr11:69451136-69458596	NA	NA
cg16832407	-0.313671	0.462599	-10.3836	8.8076e-15	1.31448e-12	23.3577	0.619434	0.305763	-0.313671	9	73736539	R	II	TRPM3	TSS200	opensea	TSS200-opensea		NA	NA			rs59612871
cg19243533	-0.178282	0.735554	-10.3828	8.8352e-15	1.31811e-12	23.3546	0.824695	0.646414	-0.178282	1	43205605	R	II	CLDN19	1stExon	shore	1stExon-shore	chr1:43204115-43204323	NA	NA
cg18613031	-0.0982993	0.883264	-10.3821	8.85704e-15	1.32081e-12	23.3522	0.932413	0.834114	-0.0982993	10	45967496	F	II	2019-03-08	Body	opensea	Body-opensea		NA	TRUE	low-CpG:45287485-45287519	rs17451757
cg09932758	-0.194661	0.764328	-10.382	8.85998e-15	1.32081e-12	23.3519	0.861659	0.666998	-0.194661	12	58022542	R	II	B4GALNT1	Body	shore	Body-shore	chr12:58021294-58022037	NA	NA
cg05174942	0.410852	0.733152	10.3819	8.86321e-15	1.32081e-12	23.3515	0.527726	0.938578	0.410852	5	140098392	R	II	VTRNA1-2	TSS200	opensea	TSS200-opensea		TRUE	NA			rs73273339
cg07366188	-0.144837	0.85799	-10.3809	8.89503e-15	1.32407e-12	23.3479	0.930408	0.785571	-0.144837	17	76220929	F	II	BIRC5	3'UTR	opensea	3'UTR-opensea		NA	NA
cg26348348	0.278649	0.38468	10.3806	8.90594e-15	1.32471e-12	23.3467	0.245355	0.524004	0.278649	2	133428993	F	I	LYPD1	1stExon	shore	1stExon-shore	chr2:133426652-133428870	TRUE	NA
cg03286774	-0.175955	0.758976	-10.3788	8.96337e-15	1.3318e-12	23.3404	0.846954	0.670998	-0.175955	16	89590357	R	I	SPG7	Body	shore	Body-shore	chr16:89588816-89589058	NA	NA
cg03818576	0.306513	0.700807	10.3787	8.96685e-15	1.3318e-12	23.34	0.54755	0.854063	0.306513	11	40312660	F	II	LRRC4C	5'UTR	opensea	5'UTR-opensea		NA	TRUE
cg02757432	-0.297255	0.313454	-10.3787	8.96686e-15	1.3318e-12	23.34	0.462082	0.164827	-0.297255	10	125426048	F	II	GPR26	1stExon	island	1stExon-island	chr10:125425495-125426642	NA	TRUE
cg25314624	0.273168	0.778825	10.3785	8.97128e-15	1.33196e-12	23.3395	0.642241	0.915409	0.273168	10	95256917	F	II	CEP55	5'UTR	shore	5'UTR-shore	chr10:95256133-95256562	NA	NA
cg16434331	0.414894	0.630222	10.3779	8.99207e-15	1.33406e-12	23.3372	0.422775	0.837669	0.414894	17	70712540	R	II	SLC39A11	Body	opensea	Body-opensea		TRUE	TRUE
cg02524983	0.211616	0.312694	10.3737	9.13198e-15	1.35166e-12	23.3219	0.206886	0.418502	0.211616	3	188012918	F	I	LPP	5'UTR	opensea	5'UTR-opensea		NA	NA		rs9832929
cg09527270	-0.199154	0.702882	-10.3736	9.1343e-15	1.35166e-12	23.3216	0.802459	0.603305	-0.199154	2	25390385	F	I	POMC	5'UTR	shore	5'UTR-shore	chr2:25391072-25391875	NA	NA		rs35626084
cg12304937	0.28206	0.534378	10.3699	9.25618e-15	1.36767e-12	23.3085	0.393348	0.675408	0.28206	7	680013	R	II	PRKAR1B	Body	shelf	Body-shelf	chr7:675569-676095	NA	NA
cg14593033	0.152676	0.268334	10.3692	9.28237e-15	1.37104e-12	23.3057	0.191997	0.344672	0.152676	17	56296980	F	II	MKS1	TSS200	shore	TSS200-shore	chr17:56296488-56296842	NA	TRUE
cg14415844	0.119098	0.147336	10.3656	9.40317e-15	1.38837e-12	23.2929	0.0877873	0.206886	0.119098	14	91884659	F	II	CCDC88C	TSS1500	island	TSS1500-island	chr14:91883672-91885367	TRUE	TRUE
cg12520549	-0.208703	0.242492	-10.3642	9.45234e-15	1.39511e-12	23.2877	0.346843	0.138141	-0.208703	2	162280741	R	I	TBR1	3'UTR	shore	3'UTR-shore	chr2:162279835-162280709	TRUE	TRUE
cg02865033	-0.159786	0.780549	-10.3631	9.49065e-15	1.40025e-12	23.2837	0.860442	0.700656	-0.159786	16	31235535	R	II	TRIM72	Body	island	Body-island	chr16:31235525-31236104	NA	NA
cg18954541	-0.19821	0.330928	-10.3627	9.50415e-15	1.40173e-12	23.2823	0.430033	0.231823	-0.19821	20	45279985	F	I	SLC13A3	1stExon	island	1stExon-island	chr20:45279781-45280169	NA	NA		rs73598391
cg14235768	-0.246775	0.595905	-10.3616	9.53969e-15	1.40593e-12	23.2786	0.719293	0.472518	-0.246775	2	71132250	R	II	VAX2	Body	island	Body-island	chr2:71131200-71132256	NA	NA
cg13476932	-0.120866	0.819341	-10.3607	9.57235e-15	1.41023e-12	23.2752	0.879774	0.758908	-0.120866	1	6260373	R	II	RPL22	TSS1500	shore	TSS1500-shore	chr1:6259178-6259883	NA	NA
cg12304520	-0.392521	0.50077	-10.3589	9.6357e-15	1.41904e-12	23.2686	0.69703	0.304509	-0.392521	5	140810123	R	II	PCDHGA4	Body	shore	Body-shore	chr5:140810494-140812617	TRUE	NA	low-CpG:140790256-140790651
cg02530321	0.213597	0.360549	10.3575	9.68403e-15	1.42443e-12	23.2637	0.25375	0.467347	0.213597	20	43103795	F	II	TTPAL	TSS1500	shore	TSS1500-shore	chr20:43104406-43104654	NA	NA		rs77107330	rs73279652
cg18229521	-0.348317	0.252856	-10.3574	9.68652e-15	1.42443e-12	23.2634	0.427014	0.0786973	-0.348317	14	92790285	R	I	SLC24A4	1stExon	island	1stExon-island	chr14:92789494-92790712	TRUE	NA
cg00529958	-0.256749	0.302686	-10.3567	9.71117e-15	1.42701e-12	23.2609	0.43106	0.174311	-0.256749	13	100624288	R	I	ZIC5	TSS200	island	TSS200-island	chr13:100620241-100624348	NA	NA
cg08857729	-0.332795	0.273262	-10.3563	9.72654e-15	1.42851e-12	23.2593	0.43966	0.106865	-0.332795	1	67217826	F	I	TCTEX1D1	TSS1500	shore	TSS1500-shore	chr1:67218079-67218293	NA	TRUE			rs61780944
cg16330965	0.215705	0.597213	10.3563	9.72854e-15	1.42851e-12	23.2591	0.489361	0.705066	0.215705	15	66790390	F	II	SNAPC5	TSS1500	shore	TSS1500-shore	chr15:66789933-66790248	NA	NA
cg04948438	0.299818	0.71525	10.3551	9.77085e-15	1.43315e-12	23.2548	0.565341	0.865159	0.299818	10	99301906	F	II	UBTD1	Body	opensea	Body-opensea		TRUE	TRUE			rs80130945
cg13784235	-0.414122	0.349398	-10.3529	9.84715e-15	1.4417e-12	23.2471	0.556459	0.142337	-0.414122	6	108495865	F	II	NR2E1	Body	island	Body-island	chr6:108495654-108495986	TRUE	NA		rs41287534
cg24988255	-0.345507	0.413403	-10.3526	9.85936e-15	1.44296e-12	23.2459	0.586156	0.240649	-0.345507	7	27225396	F	II	HOXA11AS	Body	island	Body-island	chr7:27225050-27225629	NA	NA			rs61741589
cg02983090	0.278515	0.244912	10.3524	9.8656e-15	1.44335e-12	23.2452	0.105654	0.384169	0.278515	16	27437892	R	II	IL21R	TSS1500	opensea	TSS1500-opensea		TRUE	TRUE
cg06575035	-0.212848	0.665289	-10.3516	9.89335e-15	1.44635e-12	23.2425	0.771713	0.558866	-0.212848	5	140744449	R	II	PCDHGA4	Body	island	Body-island	chr5:140743961-140744642	NA	NA
cg21811143	-0.363695	0.260475	-10.3507	9.92623e-15	1.45063e-12	23.2392	0.442322	0.0786273	-0.363695	2	119599748	F	II	EN1	3'UTR	island	3'UTR-island	chr2:119599458-119600966	NA	NA		rs55990007
cg03804083	0.280954	0.669421	10.3504	9.93865e-15	1.45192e-12	23.2379	0.528944	0.809898	0.280954	3	168891416	R	II	MECOM	Body	opensea	Body-opensea		NA	TRUE
cg05667197	0.253973	0.579874	10.3489	9.99276e-15	1.45929e-12	23.2325	0.452888	0.706861	0.253973	7	142828903	F	II	PIP	TSS1500	opensea	TSS1500-opensea		NA	NA
cg05047401	-0.301898	0.461385	-10.3481	1.00197e-14	1.46269e-12	23.2299	0.612335	0.310436	-0.301898	1	156131213	F	I	SEMA4A	Body	opensea	Body-opensea		TRUE	TRUE
cg26361533	0.317826	0.343787	10.348	1.00268e-14	1.46297e-12	23.2292	0.184874	0.5027	0.317826	12	2445561	F	II	CACNA1C	Body	opensea	Body-opensea		TRUE	TRUE
cg11899535	-0.372766	0.333418	-10.3479	1.00289e-14	1.46297e-12	23.229	0.519801	0.147035	-0.372766	7	70598282	R	II	WBSCR17	Body	island	Body-island	chr7:70596228-70598382	TRUE	NA
cg00445405	-0.298663	0.537645	-10.3477	1.00367e-14	1.46358e-12	23.2282	0.686976	0.388314	-0.298663	2	63281844	R	II	OTX1	Body	shore	Body-shore	chr2:63282514-63283122	NA	NA
cg18336674	-0.266009	0.459778	-10.3475	1.00421e-14	1.46383e-12	23.2277	0.592782	0.326773	-0.266009	5	170735264	R	I	TLX3	TSS1500	island	TSS1500-island	chr5:170735169-170739863	NA	NA
cg20528837	-0.172298	0.758869	-10.3459	1.01009e-14	1.47175e-12	23.2219	0.845018	0.672719	-0.172298	3	45052889	R	II	EXOSC7	3'UTR	opensea	3'UTR-opensea		TRUE	TRUE
cg04967578	-0.372493	0.483982	-10.3459	1.01038e-14	1.47175e-12	23.2216	0.670229	0.297736	-0.372493	18	13641894	R	II	C18orf1	Body	island	Body-island	chr18:13641584-13642415	NA	NA
cg02263932	-0.314121	0.386926	-10.3452	1.01273e-14	1.47423e-12	23.2193	0.543987	0.229865	-0.314121	20	50109099	R	II	NFATC2	Body	island	Body-island	chr20:50108795-50109456	NA	NA
cg23685969	0.320585	0.623305	10.3452	1.01282e-14	1.47423e-12	23.2192	0.463013	0.783598	0.320585	10	73976821	F	II	ASCC1	TSS1500	shore	TSS1500-shore	chr10:73975671-73976115	NA	NA
cg07788092	-0.370338	0.35247	-10.3442	1.01647e-14	1.47848e-12	23.2156	0.537639	0.167301	-0.370338	19	9473691	F	II	ZNF177	TSS200	island	TSS200-island	chr19:9473589-9474001	NA	NA
cg16348470	-0.339899	0.267238	-10.3433	1.01962e-14	1.48252e-12	23.2125	0.437187	0.097288	-0.339899	1	34642609	R	I	C1orf94	5'UTR	island	5'UTR-island	chr1:34642382-34643024	NA	NA
cg07207982	-0.335644	0.630587	-10.3413	1.02725e-14	1.49252e-12	23.2052	0.798409	0.462765	-0.335644	6	34984930	R	II	ANKS1A	Body	opensea	Body-opensea		NA	NA	low-CpG:35092779-35093041
cg12064195	-0.12224	0.821956	-10.3406	1.02993e-14	1.49526e-12	23.2026	0.883076	0.760836	-0.12224	22	47367756	F	II	TBC1D22A	Body	shelf	Body-shelf	chr22:47370112-47370343	NA	TRUE			rs35223355
cg05287314	0.168626	0.230314	10.3403	1.03102e-14	1.49583e-12	23.2015	0.146	0.314627	0.168626	20	822198	F	II	FAM110A	5'UTR	island	5'UTR-island	chr20:821674-822500	NA	NA
cg11736940	-0.239755	0.49775	-10.3392	1.03503e-14	1.50002e-12	23.1977	0.617627	0.377872	-0.239755	1	155265026	F	II	PKLR	Body	island	Body-island	chr1:155264318-155265536	NA	NA
cg15374686	-0.216607	0.581661	-10.3382	1.03887e-14	1.50396e-12	23.194	0.689965	0.473358	-0.216607	1	110694263	F	II	SLC6A17	5'UTR	island	5'UTR-island	chr1:110692988-110694264	NA	TRUE
cg18711535	0.291498	0.576659	10.3362	1.04646e-14	1.51222e-12	23.1868	0.430909	0.722408	0.291498	15	64736348	F	II	TRIP4	Body	opensea	Body-opensea		TRUE	TRUE		rs57400052
cg00804803	-0.165404	0.831372	-10.3361	1.04697e-14	1.5124e-12	23.1863	0.914074	0.74867	-0.165404	1	10601595	R	I	PEX14	Body	opensea	Body-opensea		NA	NA
cg10292376	-0.254259	0.463525	-10.3338	1.05574e-14	1.52398e-12	23.178	0.590654	0.336395	-0.254259	12	52995070	F	II	KRT72	1stExon	island	1stExon-island	chr12:52994772-52995312	NA	NA
cg09803959	0.357442	0.382087	10.3297	1.07147e-14	1.54445e-12	23.1634	0.203366	0.560808	0.357442	17	78865514	F	II	RPTOR	Body	shore	Body-shore	chr17:78863569-78863813	NA	TRUE		rs2289764
cg15513620	-0.255532	0.334753	-10.3295	1.07247e-14	1.54533e-12	23.1624	0.462519	0.206987	-0.255532	1	120174873	R	II	ZNF697	5'UTR	opensea	5'UTR-opensea		NA	TRUE
cg27319917	-0.375068	0.477495	-10.3289	1.07463e-14	1.54734e-12	23.1604	0.665029	0.289961	-0.375068	16	48592694	F	II	N4BP1	Body	opensea	Body-opensea		NA	TRUE
cg12455762	0.193865	0.32679	10.3282	1.07736e-14	1.55071e-12	23.1579	0.229858	0.423723	0.193865	4	40859095	F	I	APBB2	Body	island	Body-island	chr4:40858884-40859162	TRUE	NA	high-CpG:40553838-40554026
cg15031753	-0.140841	0.852271	-10.3277	1.07932e-14	1.55242e-12	23.1561	0.922691	0.781851	-0.140841	4	184938291	R	II	STOX2	Body	opensea	Body-opensea		NA	TRUE
cg19194373	-0.307717	0.280743	-10.3275	1.08005e-14	1.55244e-12	23.1554	0.434602	0.126885	-0.307717	20	57875703	R	I	EDN3	5'UTR	island	5'UTR-island	chr20:57875317-57876126	NA	TRUE
cg20985269	0.27341	0.706195	10.3269	1.08247e-14	1.55499e-12	23.1532	0.56949	0.8429	0.27341	1	158576809	R	II	OR10Z1	1stExon	opensea	1stExon-opensea		NA	NA
cg25788793	0.278618	0.380627	10.3269	1.08266e-14	1.55499e-12	23.1531	0.241318	0.519936	0.278618	4	10034580	F	II	SLC2A9	5'UTR	opensea	5'UTR-opensea		NA	TRUE
cg05445490	0.259753	0.668113	10.3259	1.08631e-14	1.55968e-12	23.1497	0.538236	0.797989	0.259753	11	131893019	F	II	NTM	Body	opensea	Body-opensea		NA	TRUE
cg07862488	-0.305385	0.40272	-10.3254	1.08824e-14	1.56157e-12	23.1479	0.555413	0.250028	-0.305385	14	60977054	R	II	SIX6	Body	island	Body-island	chr14:60975732-60978180	NA	NA
cg20847580	-0.226227	0.47069	-10.3254	1.08841e-14	1.56157e-12	23.1478	0.583803	0.357576	-0.226227	6	41528750	F	I	FOXP4	5'UTR	island	5'UTR-island	chr6:41528266-41528900	TRUE	NA
cg17670263	0.24433	0.606883	10.3239	1.0945e-14	1.56957e-12	23.1423	0.484718	0.729048	0.24433	19	54210233	F	II	MIR520C	TSS1500	opensea	TSS1500-opensea		NA	NA
cg23741006	0.25001	0.412835	10.3238	1.09477e-14	1.56957e-12	23.142	0.28783	0.537839	0.25001	11	59634191	F	II	TCN1	TSS200	opensea	TSS200-opensea		NA	NA
cg11071207	-0.321979	0.325551	-10.3228	1.09869e-14	1.57274e-12	23.1385	0.486541	0.164562	-0.321979	1	110611218	R	II	ALX3	Body	island	Body-island	chr1:110610265-110613303	NA	TRUE
cg05088898	-0.327257	0.373028	-10.3227	1.09933e-14	1.57274e-12	23.1379	0.536657	0.2094	-0.327257	10	120489294	F	II	C10orf46	Body	opensea	Body-opensea		NA	NA
cg02519751	-0.331022	0.525557	-10.3227	1.09933e-14	1.57274e-12	23.1379	0.691067	0.360046	-0.331022	3	147126753	R	I	ZIC1	TSS1500	shore	TSS1500-shore	chr3:147126988-147128999	TRUE	NA
cg07877559	-0.324298	0.316674	-10.3204	1.10844e-14	1.58407e-12	23.1297	0.478823	0.154526	-0.324298	5	11903299	F	II	CTNND2	Body	shore	Body-shore	chr5:11903550-11904703	NA	NA
cg04534765	-0.32513	0.252311	-10.3202	1.10918e-14	1.58456e-12	23.1291	0.414876	0.0897464	-0.32513	18	74962369	F	I	GALR1	1stExon	island	1stExon-island	chr18:74961556-74963822	NA	TRUE
cg14185201	0.221144	0.461297	10.3184	1.11664e-14	1.59408e-12	23.1224	0.350725	0.571869	0.221144	14	79162188	F	II	NRXN3	Body	opensea	Body-opensea		NA	NA
cg09465142	-0.307589	0.394101	-10.3179	1.11864e-14	1.59637e-12	23.1206	0.547896	0.240307	-0.307589	20	50109375	R	II	NFATC2	Body	island	Body-island	chr20:50108795-50109456	NA	NA
cg00665650	0.203654	0.358492	10.3164	1.12481e-14	1.60404e-12	23.1152	0.256665	0.460319	0.203654	5	138676787	F	II	PAIP2	TSS1500	shore	TSS1500-shore	chr5:138677333-138678248	NA	NA
cg24504361	0.237196	0.503107	10.3142	1.13365e-14	1.61434e-12	23.1074	0.384509	0.621704	0.237196	12	53297987	R	II	KRT8	Body	shore	Body-shore	chr12:53297442-53297824	TRUE	TRUE
cg18990042	-0.255203	0.519585	-10.3139	1.13488e-14	1.61552e-12	23.1063	0.647186	0.391983	-0.255203	12	48399169	R	II	COL2A1	TSS1500	island	TSS1500-island	chr12:48399168-48399372	NA	NA
cg10364040	-0.393101	0.302444	-10.3135	1.13682e-14	1.61771e-12	23.1046	0.498995	0.105894	-0.393101	2	176981064	F	I	HOXD10	TSS1500	island	TSS1500-island	chr2:176980765-176981423	TRUE	NA
cg00144335	-0.228177	0.679324	-10.3121	1.1423e-14	1.62492e-12	23.0999	0.793412	0.565235	-0.228177	4	107176	R	II	ZNF718	Body	island	Body-island	chr4:107146-107898	NA	NA
cg01807825	0.239828	0.666388	10.3119	1.14347e-14	1.62601e-12	23.0989	0.546474	0.786301	0.239828	4	80329368	R	II	GK2	1stExon	opensea	1stExon-opensea		NA	NA
cg03294491	0.203153	0.426257	10.3087	1.15686e-14	1.64289e-12	23.0873	0.32468	0.527833	0.203153	18	45458243	F	II	SMAD2	TSS1500	shore	TSS1500-shore	chr18:45456484-45458024	NA	NA
cg23633856	-0.285767	0.551423	-10.3077	1.16079e-14	1.64713e-12	23.0839	0.694306	0.40854	-0.285767	1	170636363	R	II	PRRX1	Body	shelf	Body-shelf	chr1:170633274-170634178	NA	NA			rs4656219
cg10423607	0.294153	0.348579	10.307	1.16378e-14	1.65079e-12	23.0814	0.201503	0.495655	0.294153	8	68418480	F	II	CPA6	Body	opensea	Body-opensea		NA	TRUE
cg08296903	-0.173061	0.810901	-10.305	1.17252e-14	1.66162e-12	23.074	0.897431	0.72437	-0.173061	16	14029456	F	II	ERCC4	Body	opensea	Body-opensea		NA	NA		rs55736359
cg24154839	-0.289791	0.244096	-10.3042	1.17568e-14	1.66402e-12	23.0713	0.388992	0.0992012	-0.289791	4	46995741	F	I	GABRA4	TSS200	island	TSS200-island	chr4:46995128-46995872	NA	NA
cg06786219	-0.312077	0.201681	-10.3026	1.18268e-14	1.67168e-12	23.0654	0.35772	0.0456429	-0.312077	3	124499653	F	II	ITGB5	Body	opensea	Body-opensea		TRUE	TRUE		rs3772827
cg05581451	-0.219548	0.31594	-10.3022	1.18419e-14	1.67323e-12	23.0641	0.425714	0.206166	-0.219548	4	111553999	R	I	PITX2	Body	island	Body-island	chr4:111553079-111554210	NA	NA
cg18728264	0.220866	0.500572	10.3007	1.19092e-14	1.68156e-12	23.0585	0.390139	0.611005	0.220866	11	118766491	F	I	CXCR5	1stExon	opensea	1stExon-opensea		NA	TRUE
cg14036402	0.311648	0.448241	10.2994	1.19637e-14	1.68865e-12	23.054	0.292417	0.604064	0.311648	1	15743671	R	II	EFHD2	Body	opensea	Body-opensea		TRUE	TRUE
cg03255182	-0.258654	0.328917	-10.2972	1.2061e-14	1.70179e-12	23.046	0.458244	0.199591	-0.258654	12	54423566	F	I	HOXC4	5'UTR	island	5'UTR-island	chr12:54423427-54423712	NA	NA			rs61736613
cg16915316	-0.25021	0.418947	-10.295	1.21586e-14	1.71374e-12	23.038	0.544052	0.293842	-0.25021	12	58237272	R	II	CTDSP2	Body	shore	Body-shore	chr12:58238840-58241046	NA	NA
cg16888658	0.323589	0.511532	10.2947	1.21721e-14	1.71505e-12	23.0369	0.349738	0.673326	0.323589	2	25142117	F	II	ADCY3	TSS200	shore	TSS200-shore	chr2:25142472-25143689	NA	NA
cg02558362	-0.272188	0.464655	-10.294	1.22024e-14	1.71872e-12	23.0344	0.600749	0.32856	-0.272188	13	36052605	R	II	MIR548F5	Body	island	Body-island	chr13:36052553-36053119	NA	NA
cg13721134	-0.304066	0.289312	-10.2918	1.22989e-14	1.72987e-12	23.0266	0.441345	0.137279	-0.304066	8	86350390	F	II	CA3	TSS1500	shore	TSS1500-shore	chr8:86350765-86351196	NA	TRUE
cg00486340	-0.295409	0.299081	-10.2913	1.23228e-14	1.73201e-12	23.0247	0.446786	0.151377	-0.295409	4	4860026	F	II	MSX1	TSS1500	island	TSS1500-island	chr4:4859632-4860191	NA	NA
cg13720362	-0.251933	0.488738	-10.2903	1.23706e-14	1.73813e-12	23.0208	0.614704	0.362771	-0.251933	6	108492271	R	II	NR2E1	Body	shore	Body-shore	chr6:108485671-108490539	NA	NA
cg15312264	-0.321005	0.34878	-10.2884	1.2455e-14	1.74936e-12	23.0141	0.509282	0.188277	-0.321005	14	55907299	R	I	TBPL2	TSS200	island	TSS200-island	chr14:55907197-55907433	NA	NA
cg01946784	-0.148021	0.807601	-10.288	1.24711e-14	1.75102e-12	23.0128	0.881611	0.73359	-0.148021	2	121991815	F	II	TFCP2L1	Body	opensea	Body-opensea		NA	NA
cg07436074	0.193879	0.545198	10.2876	1.24924e-14	1.7534e-12	23.0111	0.448258	0.642138	0.193879	6	162071140	R	II	PARK2	Body	shelf	Body-shelf	chr6:162066917-162067689	NA	NA			rs74766886
cg14266527	-0.186501	0.787997	-10.287	1.2516e-14	1.75609e-12	23.0092	0.881247	0.694746	-0.186501	4	151501298	F	II	LRBA	Body	island	Body-island	chr4:151500763-151501299	NA	NA
cg10624729	-0.178094	0.764102	-10.2864	1.2544e-14	1.75879e-12	23.007	0.853149	0.675055	-0.178094	1	78298207	F	II	FAM73A	Body	opensea	Body-opensea		NA	TRUE
cg01271812	-0.285313	0.567567	-10.286	1.25619e-14	1.76007e-12	23.0056	0.710224	0.42491	-0.285313	2	66671478	R	II	MEIS1	Body	shore	Body-shore	chr2:66672431-66673636	NA	NA
cg25986240	0.255215	0.606328	10.2848	1.26202e-14	1.76762e-12	23.001	0.478721	0.733936	0.255215	4	9926439	R	II	SLC2A9	Body	opensea	Body-opensea		NA	TRUE
cg26686927	-0.111891	0.819296	-10.2836	1.26757e-14	1.77416e-12	22.9967	0.875242	0.763351	-0.111891	3	195599256	R	II	TNK2	Body	island	Body-island	chr3:195599024-195599392	TRUE	NA
cg26531231	0.32509	0.775891	10.2777	1.29515e-14	1.80959e-12	22.9753	0.613346	0.938436	0.32509	4	40336255	R	II	CHRNA9	TSS1500	opensea	TSS1500-opensea		TRUE	TRUE
cg19294311	0.188678	0.239113	10.2776	1.29567e-14	1.80969e-12	22.9749	0.144774	0.333452	0.188678	15	62358920	F	II	C2CD4A	TSS1500	shore	TSS1500-shore	chr15:62359827-62360995	NA	NA
cg17707140	-0.309363	0.425173	-10.2771	1.2977e-14	1.8119e-12	22.9734	0.579855	0.270491	-0.309363	4	111559355	R	II	PITX2	TSS1500	shore	TSS1500-shore	chr4:111560563-111560808	NA	NA
cg25278144	0.291375	0.626664	10.2767	1.29973e-14	1.8141e-12	22.9718	0.480977	0.772352	0.291375	17	77962240	R	II	TBC1D16	Body	shelf	Body-shelf	chr17:77965805-77966296	TRUE	NA
cg26537568	-0.181817	0.704389	-10.2764	1.30097e-14	1.81519e-12	22.9709	0.795297	0.61348	-0.181817	20	32304371	R	II	PXMP4	Body	shelf	Body-shelf	chr20:32307817-32308120	NA	NA
cg27480727	-0.312455	0.444128	-10.276	1.30322e-14	1.81757e-12	22.9692	0.600356	0.287901	-0.312455	2	223164831	R	II	PAX3	TSS1500	shore	TSS1500-shore	chr2:223162946-223163912	NA	TRUE
cg08065657	-0.349878	0.33953	-10.2759	1.30358e-14	1.81757e-12	22.9689	0.514469	0.164591	-0.349878	19	52223099	R	II	HAS1	Body	island	Body-island	chr19:52222423-52223208	NA	NA
cg18334734	-0.376868	0.353559	-10.2742	1.3116e-14	1.82698e-12	22.9628	0.541993	0.165125	-0.376868	5	87959611	F	II	LOC645323	Body	shelf	Body-shelf	chr5:87955638-87955864	NA	NA
cg20730770	-0.335256	0.472812	-10.2742	1.3117e-14	1.82698e-12	22.9627	0.64044	0.305184	-0.335256	5	140563241	R	II	PCDHB16	1stExon	shore	1stExon-shore	chr5:140563510-140564361	NA	NA
cg00073460	0.291717	0.499557	10.274	1.31253e-14	1.82751e-12	22.9621	0.353699	0.645415	0.291717	6	149806502	F	II	ZC3H12D	TSS1500	opensea	TSS1500-opensea		NA	NA
cg04590790	0.320598	0.649593	10.2724	1.32014e-14	1.83747e-12	22.9564	0.489294	0.809892	0.320598	5	7770690	R	II	ADCY2	Body	opensea	Body-opensea		NA	TRUE
cg16666329	-0.287257	0.272472	-10.271	1.3272e-14	1.84665e-12	22.9511	0.416101	0.128844	-0.287257	5	76932526	F	II	OTP	Body	island	Body-island	chr5:76932317-76933523	NA	NA
cg22160448	-0.243887	0.593254	-10.2708	1.32808e-14	1.84723e-12	22.9504	0.715197	0.47131	-0.243887	5	170734856	F	I	TLX3	TSS1500	shore	TSS1500-shore	chr5:170735169-170739863	NA	TRUE
cg18930354	-0.281378	0.239522	-10.2694	1.33492e-14	1.8561e-12	22.9453	0.380211	0.0988327	-0.281378	3	147109629	F	II	ZIC4	Body	island	Body-island	chr3:147108511-147111703	NA	NA
cg26777456	-0.312448	0.438127	-10.2686	1.33888e-14	1.86031e-12	22.9424	0.594351	0.281903	-0.312448	12	54454250	R	II	FLJ12825	Body	island	Body-island	chr12:54454249-54454458	NA	TRUE
cg16281600	0.254155	0.617239	10.2685	1.33935e-14	1.86032e-12	22.942	0.490161	0.744316	0.254155	5	152869431	R	II	GRIA1	TSS1500	opensea	TSS1500-opensea		NA	NA
cg13364230	-0.293477	0.31848	-10.2639	1.36166e-14	1.88934e-12	22.9257	0.465219	0.171741	-0.293477	1	35258779	F	II	GJA4	5'UTR	island	5'UTR-island	chr1:35258564-35258791	NA	NA
cg04119529	-0.152176	0.687869	-10.2638	1.36223e-14	1.88945e-12	22.9252	0.763957	0.611781	-0.152176	16	2094667	F	I	NTHL1	Body	shelf	Body-shelf	chr16:2097465-2098365	NA	NA
cg01561869	-0.245737	0.662496	-10.2631	1.36562e-14	1.89213e-12	22.9228	0.785364	0.539628	-0.245737	5	140725147	F	II	PCDHGA2	Body	island	Body-island	chr5:140725051-140725891	NA	NA
cg10743390	-0.252629	0.533193	-10.263	1.36603e-14	1.89213e-12	22.9225	0.659507	0.406878	-0.252629	19	30020728	R	II	VSTM2B	Body	island	Body-island	chr19:30015781-30021367	NA	NA
cg09364733	-0.173024	0.770349	-10.2626	1.36823e-14	1.89452e-12	22.9209	0.856861	0.683836	-0.173024	13	33163175	F	II	PDS5B	5'UTR	shore	5'UTR-shore	chr13:33161192-33161835	NA	NA
cg07820868	-0.333188	0.456014	-10.2615	1.37383e-14	1.90162e-12	22.9168	0.622608	0.28942	-0.333188	1	119528638	F	II	TBX15	5'UTR	shore	5'UTR-shore	chr1:119529819-119530712	NA	NA
cg01884917	-0.216218	0.714701	-10.2575	1.39394e-14	1.92614e-12	22.9024	0.82281	0.606592	-0.216218	17	1038155	R	I	ABR	Body	opensea	Body-opensea		NA	NA
cg08812189	-0.387383	0.311038	-10.2553	1.40509e-14	1.93953e-12	22.8945	0.50473	0.117347	-0.387383	3	147110367	R	II	ZIC4	Body	island	Body-island	chr3:147108511-147111703	TRUE	TRUE
cg05167251	-0.316568	0.280367	-10.2543	1.41031e-14	1.94533e-12	22.8908	0.438651	0.122083	-0.316568	2	176987465	R	I	HOXD9	5'UTR	island	5'UTR-island	chr2:176986424-176988291	TRUE	TRUE	high-CpG:176695692-176695717
cg15473218	0.225721	0.701694	10.2533	1.41523e-14	1.95084e-12	22.8874	0.588833	0.814554	0.225721	19	18109045	F	I	KCNN1	Body	island	Body-island	chr19:18108894-18109272	TRUE	NA
cg20792062	-0.300996	0.320536	-10.2528	1.41801e-14	1.954e-12	22.8854	0.471035	0.170038	-0.300996	12	5153288	F	II	KCNA5	5'UTR	island	5'UTR-island	chr12:5153012-5154346	NA	TRUE
cg07536910	-0.361525	0.309992	-10.252	1.4224e-14	1.95833e-12	22.8824	0.490754	0.129229	-0.361525	2	176948105	R	I	EVX2	1stExon	island	1stExon-island	chr2:176944087-176948446	NA	NA
cg09535924	-0.222173	0.442677	-10.2519	1.42262e-14	1.95833e-12	22.8822	0.553764	0.331591	-0.222173	2	66671659	F	I	MEIS1	Body	shore	Body-shore	chr2:66672431-66673636	NA	NA
cg11345143	-0.110866	0.818088	-10.2497	1.43431e-14	1.97374e-12	22.8741	0.873521	0.762655	-0.110866	13	20989349	R	II	CRYL1	Body	island	Body-island	chr13:20989007-20989836	NA	NA
cg03944843	0.259267	0.350736	10.2484	1.44087e-14	1.98209e-12	22.8696	0.221103	0.480369	0.259267	1	24307429	F	II	SFRS13A	TSS1500	shore	TSS1500-shore	chr1:24306363-24307017	NA	NA		rs75703238
cg16732787	-0.288387	0.614711	-10.247	1.44825e-14	1.98952e-12	22.8645	0.758904	0.470517	-0.288387	1	228785992	R	II	DUSP5P	Body	island	Body-island	chr1:228785986-228786204	NA	NA
cg19533977	0.33177	0.285253	10.2466	1.45038e-14	1.99175e-12	22.863	0.119368	0.451137	0.33177	17	57719682	F	II	CLTC	Body	opensea	Body-opensea		NA	TRUE
cg06578276	0.266186	0.441377	10.2461	1.45322e-14	1.99429e-12	22.8611	0.308284	0.57447	0.266186	17	79068856	F	II	BAIAP2	Body	opensea	Body-opensea		NA	TRUE		rs4969385
cg22774211	-0.192058	0.651771	-10.2424	1.47297e-14	2.01932e-12	22.8477	0.7478	0.555742	-0.192058	1	120439014	R	II	ADAM30	1stExon	island	1stExon-island	chr1:120439013-120439220	NA	NA
cg05343689	-0.166661	0.723602	-10.2419	1.47572e-14	2.02205e-12	22.8459	0.806933	0.640272	-0.166661	11	75852437	F	I	UVRAG	Body	opensea	Body-opensea		NA	NA		rs636420
cg24463290	-0.143346	0.785123	-10.2418	1.47597e-14	2.02205e-12	22.8457	0.856796	0.713449	-0.143346	10	114922641	F	II	TCF7L2	Body	shelf	Body-shelf	chr10:114925522-114925751	NA	TRUE
cg22400015	-0.224365	0.439111	-10.2413	1.47897e-14	2.02546e-12	22.8437	0.551293	0.326929	-0.224365	2	220196714	R	I	RESP18	Body	island	Body-island	chr2:220196431-220196768	TRUE	NA
cg22734676	-0.0990236	0.871399	-10.2387	1.49287e-14	2.04311e-12	22.8344	0.920911	0.821887	-0.0990236	4	185139478	R	II	ENPP6	TSS1500	opensea	TSS1500-opensea		NA	NA
cg03051880	-0.218891	0.606783	-10.2313	1.53398e-14	2.09638e-12	22.8075	0.716228	0.497337	-0.218891	6	119662024	F	II	MAN1A1	Body	opensea	Body-opensea		NA	TRUE
cg02150354	-0.229559	0.46428	-10.2312	1.53442e-14	2.09638e-12	22.8072	0.57906	0.349501	-0.229559	5	92914202	F	II	FLJ42709	Body	shore	Body-shore	chr5:92914770-92917337	NA	NA
cg05937737	-0.306177	0.39028	-10.2299	1.54173e-14	2.10495e-12	22.8025	0.543368	0.237191	-0.306177	3	170303540	F	I	SLC7A14	5'UTR	island	5'UTR-island	chr3:170303532-170303768	NA	NA
cg19926444	-0.314795	0.463728	-10.2291	1.54644e-14	2.11065e-12	22.7994	0.621125	0.30633	-0.314795	19	12624742	F	I	ZNF709	TSS200	shore	TSS200-shore	chr19:12624273-12624477	NA	NA		rs61372517	rs62113566
cg04521004	-0.338668	0.39884	-10.2288	1.5476e-14	2.11152e-12	22.7987	0.568174	0.229506	-0.338668	3	157821262	R	II	SHOX2	Body	island	Body-island	chr3:157821232-157821604	NA	NA
cg10997718	-0.344445	0.362973	-10.2273	1.55609e-14	2.12238e-12	22.7933	0.535195	0.19075	-0.344445	2	162275690	F	II	TBR1	Body	shore	Body-shore	chr2:162273294-162273725	NA	NA
cg10749822	-0.202163	0.465797	-10.2258	1.56484e-14	2.13286e-12	22.7877	0.566879	0.364716	-0.202163	11	44332913	R	II	ALX4	TSS1500	shore	TSS1500-shore	chr11:44330542-44331761	TRUE	NA
cg13748794	-0.0930209	0.895428	-10.2256	1.56615e-14	2.13392e-12	22.7869	0.941938	0.848918	-0.0930209	6	151413946	R	II	MTHFD1L	3'UTR	shore	3'UTR-shore	chr6:151412003-151412339	NA	NA
cg26550787	-0.13944	0.814183	-10.223	1.58101e-14	2.15344e-12	22.7775	0.883903	0.744463	-0.13944	3	120369337	R	II	HGD	Body	opensea	Body-opensea		NA	TRUE
cg00347620	-0.196989	0.451902	-10.2227	1.58257e-14	2.15483e-12	22.7765	0.550397	0.353408	-0.196989	12	115109730	R	I	TBX3	Body	island	Body-island	chr12:115109503-115110061	NA	NA
cg12290311	-0.321826	0.648317	-10.2209	1.59314e-14	2.16775e-12	22.7699	0.80923	0.487404	-0.321826	5	39424119	F	II	DAB2	5'UTR	shore	5'UTR-shore	chr5:39424892-39425320	NA	NA		rs60805730
cg07010146	0.254957	0.692626	10.2204	1.59586e-14	2.17071e-12	22.7682	0.565147	0.820104	0.254957	10	105239205	R	II	CALHM3	TSS1500	opensea	TSS1500-opensea		TRUE	NA
cg04305653	-0.113992	0.851299	-10.2203	1.59683e-14	2.1713e-12	22.7676	0.908296	0.794303	-0.113992	22	47272422	F	II	TBC1D22A	Body	opensea	Body-opensea		NA	NA			rs57689440
cg23502378	-0.0774779	0.889372	-10.2201	1.59808e-14	2.17226e-12	22.7669	0.928111	0.850633	-0.0774779	6	157877218	F	II	ZDHHC14	Body	opensea	Body-opensea		NA	TRUE
cg12764034	-0.322673	0.291476	-10.2162	1.62092e-14	2.20249e-12	22.7528	0.452813	0.13014	-0.322673	1	75602846	F	I	LHX8	Body	island	Body-island	chr1:75601998-75602878	NA	NA
cg13741211	-0.11507	0.831397	-10.2161	1.62142e-14	2.20249e-12	22.7525	0.888933	0.773862	-0.11507	7	98607297	F	II	TRRAP	Body	shore	Body-shore	chr7:98608993-98609222	NA	NA		rs178152
cg15328703	0.280881	0.746397	10.2157	1.62371e-14	2.20449e-12	22.7511	0.605957	0.886837	0.280881	12	126142896	F	II	TMEM132B	3'UTR	opensea	3'UTR-opensea		NA	NA		rs740329
cg01117384	0.350921	0.586705	10.2126	1.64234e-14	2.22712e-12	22.7398	0.411245	0.762166	0.350921	20	56274096	F	II	PMEPA1	5'UTR	opensea	5'UTR-opensea		TRUE	NA
cg05368724	0.30799	0.711371	10.2124	1.64312e-14	2.22743e-12	22.7393	0.557376	0.865366	0.30799	2	97561669	R	II	FAM178B	5'UTR	opensea	5'UTR-opensea		TRUE	NA
cg17546247	-0.24635	0.559232	-10.2111	1.65139e-14	2.23789e-12	22.7343	0.682407	0.436057	-0.24635	3	147125714	F	II	ZIC4	TSS1500	shore	TSS1500-shore	chr3:147126988-147128999	NA	TRUE
cg11268834	-0.365207	0.437943	-10.2101	1.65719e-14	2.24423e-12	22.7308	0.620546	0.255339	-0.365207	2	224824500	R	II	MRPL44	Body	shore	Body-shore	chr2:224821928-224822575	NA	NA
cg00454770	0.253899	0.336109	10.2096	1.66045e-14	2.24789e-12	22.7289	0.20916	0.463059	0.253899	10	116286974	F	II	ABLIM1	Body	opensea	Body-opensea		TRUE	TRUE
cg16982077	-0.14168	0.753523	-10.2074	1.67386e-14	2.26527e-12	22.7209	0.824363	0.682683	-0.14168	5	138842197	F	II	ECSCR	1stExon	opensea	1stExon-opensea		NA	TRUE
cg19693031	-0.34007	0.647953	-10.2063	1.68067e-14	2.27354e-12	22.7169	0.817988	0.477918	-0.34007	1	145441552	F	II	TXNIP	3'UTR	opensea	3'UTR-opensea		NA	NA
cg18241962	-0.219723	0.368248	-10.2062	1.6811e-14	2.27354e-12	22.7166	0.47811	0.258387	-0.219723	17	75385432	R	I	2019-09-09	5'UTR	opensea	5'UTR-opensea		TRUE	NA
cg19267254	0.253836	0.370476	10.2059	1.68288e-14	2.27471e-12	22.7156	0.243558	0.497394	0.253836	1	15828075	R	II	CASP9	Body	opensea	Body-opensea		TRUE	NA
cg21974506	0.319506	0.610419	10.2059	1.6831e-14	2.27471e-12	22.7154	0.450666	0.770172	0.319506	6	33141291	R	I	COL11A2	Body	opensea	Body-opensea		NA	NA		rs2855430
cg19718882	-0.316702	0.309855	-10.2026	1.70316e-14	2.29949e-12	22.7037	0.468206	0.151504	-0.316702	11	32458714	R	II	WIT1	Body	shore	Body-shore	chr11:32459422-32459878	NA	NA
cg02919422	-0.308677	0.416863	-10.2021	1.70612e-14	2.30271e-12	22.702	0.571201	0.262524	-0.308677	8	55370544	R	II	SOX17	5'UTR	island	5'UTR-island	chr8:55370170-55372525	TRUE	NA
cg10541864	-0.365923	0.308117	-10.2017	1.7092e-14	2.30446e-12	22.7002	0.491079	0.125156	-0.365923	4	174450722	F	I	HAND2	5'UTR	island	5'UTR-island	chr4:174450046-174451469	TRUE	NA
cg15812753	-0.187321	0.425964	-10.2016	1.7096e-14	2.30446e-12	22.7	0.519624	0.332303	-0.187321	2	177029813	F	I	HOXD3	5'UTR	island	5'UTR-island	chr2:177029413-177029941	NA	NA
cg07507218	-0.101057	0.859505	-10.2015	1.71029e-14	2.30446e-12	22.6996	0.910033	0.808976	-0.101057	6	32085535	R	II	ATF6B	Body	opensea	Body-opensea		NA	NA
cg04044203	-0.308006	0.640222	-10.2003	1.71738e-14	2.31246e-12	22.6954	0.794224	0.486219	-0.308006	11	124631218	F	II	ESAM	Body	shore	Body-shore	chr11:124632063-124633239	TRUE	NA
cg26624021	-0.142956	0.820413	-10.1986	1.72863e-14	2.32641e-12	22.689	0.891891	0.748935	-0.142956	16	56995739	R	II	CETP	TSS200	opensea	TSS200-opensea		NA	TRUE			rs35634210
cg10805254	-0.244616	0.655874	-10.1985	1.7289e-14	2.32641e-12	22.6888	0.778182	0.533566	-0.244616	3	72433837	F	II	RYBP	Body	opensea	Body-opensea		NA	TRUE
cg14188840	-0.24011	0.672274	-10.198	1.73188e-14	2.32885e-12	22.6871	0.792329	0.552219	-0.24011	7	27220398	F	I	HOXA10	TSS1500	shore	TSS1500-shore	chr7:27219309-27219750	NA	NA
cg26814075	-0.233415	0.463925	-10.1974	1.73595e-14	2.33335e-12	22.6848	0.580633	0.347218	-0.233415	7	127881298	R	I	LEP	TSS200	island	TSS200-island	chr7:127880750-127881375	NA	NA
cg05512111	0.192279	0.461533	10.1961	1.7445e-14	2.34268e-12	22.6799	0.365393	0.557672	0.192279	3	118734756	R	I	IGSF11	Body	opensea	Body-opensea		NA	TRUE
cg22635491	-0.348861	0.329798	-10.1945	1.75475e-14	2.35565e-12	22.6741	0.504228	0.155367	-0.348861	12	115109934	R	I	TBX3	Body	island	Body-island	chr12:115109503-115110061	NA	NA
cg26709285	-0.250826	0.322585	-10.1936	1.7605e-14	2.36178e-12	22.6709	0.447999	0.197172	-0.250826	20	48099146	R	I	KCNB1	1stExon	island	1stExon-island	chr20:48098512-48099560	NA	NA
cg00033909	0.297389	0.550868	10.1904	1.78088e-14	2.38513e-12	22.6594	0.402173	0.699563	0.297389	7	9674902	F	II	PER4	Body	opensea	Body-opensea		NA	NA
cg04720330	0.139221	0.197378	10.1895	1.78692e-14	2.3914e-12	22.6561	0.127767	0.266988	0.139221	11	2949813	R	I	PHLDA2	3'UTR	island	3'UTR-island	chr11:2949788-2951756	NA	NA
cg25083091	-0.130592	0.836511	-10.1894	1.78735e-14	2.3914e-12	22.6558	0.901807	0.771215	-0.130592	8	10646690	F	II	PINX1	Body	opensea	Body-opensea		TRUE	TRUE		rs4841442
cg08790487	-0.0843303	0.868359	-10.1892	1.78907e-14	2.3921e-12	22.6549	0.910524	0.826194	-0.0843303	5	179135308	F	II	CANX	Body	opensea	Body-opensea		NA	NA	low-CpG:179067868-179067929	rs79378421
cg26799209	-0.387964	0.284777	-10.1885	1.79336e-14	2.39704e-12	22.6525	0.478759	0.0907954	-0.387964	8	72754953	R	II	MSC	Body	shore	Body-shore	chr8:72755783-72756667	TRUE	NA
cg02828785	-0.13863	0.827493	-10.184	1.82326e-14	2.43192e-12	22.6361	0.896807	0.758178	-0.13863	12	12846546	R	II	GPR19	5'UTR	shelf	5'UTR-shelf	chr12:12849067-12849270	NA	NA
cg17386213	-0.30118	0.243384	-10.1839	1.8237e-14	2.43192e-12	22.6359	0.393974	0.0927943	-0.30118	6	108488335	F	I	NR2E1	Body	island	Body-island	chr6:108485671-108490539	NA	NA		rs217540
cg23370512	0.225225	0.545474	10.1837	1.82523e-14	2.43297e-12	22.635	0.432862	0.658087	0.225225	11	61334385	F	II	SYT7	Body	shore	Body-shore	chr11:61335112-61335340	NA	NA
cg16463460	-0.298931	0.52108	-10.1835	1.82631e-14	2.43297e-12	22.6345	0.670546	0.371615	-0.298931	11	32454718	R	II	WT1	Body	shore	Body-shore	chr11:32454874-32457311	NA	NA
cg08995609	0.214058	0.188394	10.1816	1.83895e-14	2.44899e-12	22.6276	0.0813655	0.295423	0.214058	11	66104115	F	II	RIN1	TSS200	shore	TSS200-shore	chr11:66102024-66102279	NA	TRUE
cg01304894	-0.131246	0.832114	-10.1802	1.8485e-14	2.46008e-12	22.6225	0.897737	0.766491	-0.131246	16	70715140	R	II	MTSS1L	Body	shore	Body-shore	chr16:70713461-70714379	TRUE	TRUE
cg06179765	-0.239157	0.166856	-10.1796	1.85267e-14	2.46399e-12	22.6202	0.286435	0.0472778	-0.239157	7	23287352	F	I	GPNMB	Body	island	Body-island	chr7:23287221-23287508	TRUE	TRUE		rs80356239
cg24375409	-0.370583	0.346004	-10.179	1.85698e-14	2.46891e-12	22.6179	0.531295	0.160712	-0.370583	1	38200920	F	I	EPHA10	Body	island	Body-island	chr1:38200919-38201200	NA	NA
cg10191399	-0.09719	0.836723	-10.1784	1.86051e-14	2.47278e-12	22.616	0.885318	0.788128	-0.09719	16	81727056	F	I	CMIP	Body	opensea	Body-opensea		TRUE	TRUE
cg09969277	-0.325995	0.243525	-10.1779	1.86419e-14	2.47684e-12	22.6141	0.406523	0.0805281	-0.325995	15	89922328	F	I	LOC254559	Body	island	Body-island	chr15:89920793-89922768	NA	TRUE
cg12805865	0.249647	0.65176	10.1775	1.86707e-14	2.47915e-12	22.6126	0.526937	0.776584	0.249647	11	27061899	F	II	BBOX1	TSS1500	opensea	TSS1500-opensea		NA	NA
cg09880291	-0.266956	0.687596	-10.1774	1.86772e-14	2.47915e-12	22.6122	0.821074	0.554118	-0.266956	7	27184109	F	II	HOXA5	TSS1500	island	TSS1500-island	chr7:27182613-27185562	NA	NA
cg16536855	-0.264902	0.689903	-10.1773	1.8684e-14	2.47915e-12	22.6119	0.822354	0.557452	-0.264902	10	71038317	R	II	HK1	5'UTR	opensea	5'UTR-opensea		NA	TRUE			rs75401236
cg18731327	-0.308606	0.316408	-10.1734	1.89528e-14	2.51398e-12	22.5977	0.470711	0.162105	-0.308606	3	147114352	F	II	ZIC4	Body	island	Body-island	chr3:147113608-147114479	NA	NA
cg19163395	0.237808	0.39212	10.1729	1.89843e-14	2.51733e-12	22.596	0.273216	0.511025	0.237808	17	42164433	R	I	HDAC5	Body	opensea	Body-opensea		NA	TRUE
cg02022808	-0.331171	0.391306	-10.1727	1.90002e-14	2.51859e-12	22.5952	0.556892	0.225721	-0.331171	5	140744914	R	II	PCDHGA4	Body	shore	Body-shore	chr5:140745531-140745893	NA	NA
cg26796341	-0.226112	0.560887	-10.1726	1.90064e-14	2.51859e-12	22.5949	0.673943	0.447831	-0.226112	6	100905691	R	II	SIM1	Body	island	Body-island	chr6:100905444-100905697	NA	NA
cg21298174	-0.304392	0.50289	-10.1722	1.90325e-14	2.52122e-12	22.5935	0.655086	0.350694	-0.304392	19	12624694	F	II	ZNF709	TSS200	shore	TSS200-shore	chr19:12624273-12624477	NA	NA
cg02631126	-0.215355	0.526969	-10.1688	1.92744e-14	2.55158e-12	22.581	0.634646	0.419291	-0.215355	6	28058918	F	I	ZSCAN12L1	TSS200	opensea	TSS200-opensea		NA	NA		rs35902873
[truncated: 104,609 more rows]
